# Supplementary material for: Pd(ii) catalyzed ortho C–H iodination of phenylcarbamates at room temperature using cyclic hypervalent iodine reagents
Source: Royal Society of Chemistry journal article supplement (doi:10.1039/c5cc02533h), 2015-01-01

## Supporting Information

*Department of Pharmacology and Pharmaceutical Sciences, School of life sciences and School of Medicine, Tsinghua University, Beijing 100084, China*  
[yrao@mail.tsinghua.edu.cn](mailto:yrao@mail.tsinghua.edu.cn)

### SUPPORTING INFORMATION

| <b>Table of Contents</b>                                                                     | <b>Page</b> |
|----------------------------------------------------------------------------------------------|-------------|
| <b>Materials and Methods</b>                                                                 | <b>S2</b>   |
| <b>Optimization of the reaction conditions.</b>                                              | <b>S2</b>   |
| <b>General procedure for synthesis of carbamates</b>                                         | <b>S4</b>   |
| <b>General procedure for palladium-catalyzed the synthesis of Ortho-iodinated carbamates</b> | <b>S4</b>   |
| <b>Mechanistic study</b>                                                                     | <b>S5</b>   |
| <b>Applications</b>                                                                          | <b>S9</b>   |
| <b>References</b>                                                                            | <b>S11</b>  |
| <b>Data of products</b>                                                                      | <b>S12</b>  |

## Materials and Methods

All commercial materials (Alfa Aesar, Aladdin, J&K Chemical LTD.) were used without further purification. All solvents were analytical grade. The  $^1\text{H}$ -NMR and  $^{13}\text{C}$ -NMR spectra were recorded on a Bruker 400 MHz spectrometer in  $\text{CDCl}_3$  using TMS or solvent peak as a standard. All  $^{13}\text{C}$ -NMR spectra were recorded with complete proton decoupling. Low-resolution mass spectral analyses were performed with a Waters AQUITY UPLC<sup>TM</sup>/MS. All reactions were carried out in oven-dried sealed tube. Analytical TLC was performed on Yantai Chemical Industry Research Institute silica gel 60 F254 plates and flash column chromatography was performed on Qingdao Haiyang Chemical Co. Ltd silica gel 60 (200-300 mesh). The rotavapor was BUCHI's Rotavapor R-3.

### Optimization of the reaction conditions.

#### I Effects of various hypervalent iodine reagents

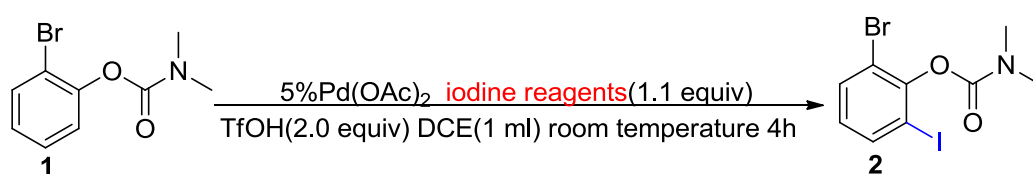

| entry | catalyst             | iodine reagents                       | conditions    | yield(%) <sup>a</sup> |
|-------|----------------------|---------------------------------------|---------------|-----------------------|
| 1     | Pd(OAc) <sub>2</sub> | Togni's reagents II                   | TfOH, DCE, rt | 20                    |
| 2     | Pd(OAc) <sub>2</sub> | Togni's reagents                      | TfOH, DCE, rt | NR                    |
| 3     | Pd(OAc) <sub>2</sub> | PhI(OAc) <sub>2</sub>                 | TfOH, DCE, rt | NR                    |
| 4     | Pd(OAc) <sub>2</sub> | I(III)-OMe                            | TfOH, DCE, rt | 70 <sup>b</sup>       |
| 5     | Pd(OAc) <sub>2</sub> | I(III)-OAc                            | TfOH, DCE, rt | 32                    |
| 6     | Pd(OAc) <sub>2</sub> | I(III)-OH                             | TfOH, DCE, rt | 47                    |
| 7     | Pd(OAc) <sub>2</sub> | I(III)-OTs                            | TfOH, DCE, rt | 37                    |
| 8     | Pd(OAc) <sub>2</sub> | DMP                                   | TfOH, DCE, rt | 43                    |
| 9     | Pd(OAc) <sub>2</sub> | NaIO <sub>3</sub>                     | TfOH, DCE, rt | 32                    |
| 10    | Pd(OAc) <sub>2</sub> | KIO <sub>3</sub>                      | TfOH, DCE, rt | 26                    |
| 11    | Pd(OAc) <sub>2</sub> | NaIO <sub>4</sub>                     | TfOH, DCE, rt | 26                    |
| 12    | Pd(OAc) <sub>2</sub> | KIO <sub>4</sub>                      | TfOH, DCE, rt | 30                    |
| 13    | Pd(OAc) <sub>2</sub> | NIS                                   | TfOH, DCE, rt | 10%+62%SP             |
| 14    | Pd(OAc) <sub>2</sub> | I <sub>2</sub> +PhI(OAc) <sub>2</sub> | TfOH, DCE, rt | 78%SP                 |
| 15    | Pd(OAc) <sub>2</sub> | I <sub>2</sub>                        | TfOH, DCE, rt | NR                    |
| 16    | Pd(OAc) <sub>2</sub> | [Hydroxy(tosyloxy)iodo]benzene        | TfOH, DCE, rt | n.t.                  |
| 17    | Pd(OAc) <sub>2</sub> | Diphenyliodonium iodide               | TfOH, DCE, rt | NR                    |
| 18    | Pd(OAc) <sub>2</sub> | Diphenyliodonium chloride             | TfOH, DCE, rt | NR                    |

<sup>a</sup>NMR yield using 4-Nitrobenzaldehyde as internal standard. <sup>b</sup>Isolated yield.

DCE=1,2-dichloroethane. TfOH=trifluoromethanesulfonic acid.

n.t. meant no target product.

SP was para-iodinated product of **1**

#### II Effects of reaction temperature

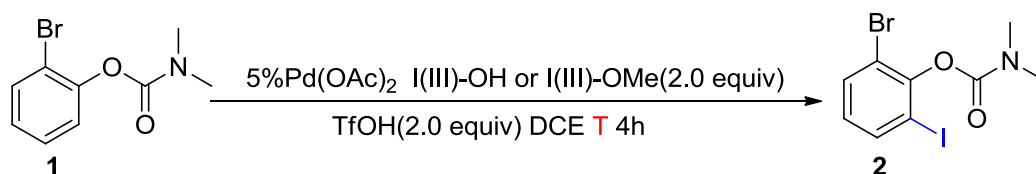

| entry | catalyst             | iodine reagents | conditions      | yield(%) <sup>a</sup> |
|-------|----------------------|-----------------|-----------------|-----------------------|
| 1     | Pd(OAc) <sub>2</sub> | I(III)-OH       | TfOH, DCE, 40°C | 60                    |
| 2     | Pd(OAc) <sub>2</sub> | I(III)-OH       | TfOH, DCE, 60°C | 37                    |
| 3     | Pd(OAc) <sub>2</sub> | I(III)-OH       | TfOH, DCE, 80°C | <10%                  |
| 4     | Pd(OAc) <sub>2</sub> | I(III)-OMe      | TfOH, DCE, 40°C | 68                    |
| 5     | Pd(OAc) <sub>2</sub> | I(III)-OMe      | TfOH, DCE, 60°C | 45                    |
| 6     | Pd(OAc) <sub>2</sub> | I(III)-OMe      | TfOH, DCE, 80°C | 30                    |

<sup>a</sup>Conversion ratio determined by <sup>1</sup>H NMR using 4-Nitrobenzaldehyde as internal standard.

### III Effects of solvents

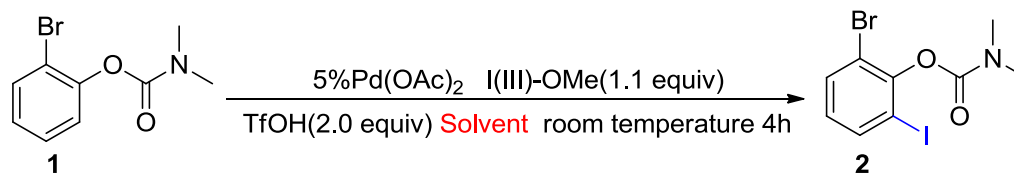

| entry | catalyst             | iodine reagents | conditions                 | yield(%) <sup>a</sup> |
|-------|----------------------|-----------------|----------------------------|-----------------------|
| 1     | Pd(OAc) <sub>2</sub> | I(III)-OMe      | TfOH, Toluene, rt          | NR                    |
| 2     | Pd(OAc) <sub>2</sub> | I(III)-OMe      | TfOH, MeOH, rt             | NR                    |
| 3     | Pd(OAc) <sub>2</sub> | I(III)-OMe      | TfOH, EtOH, rt             | NR                    |
| 4     | Pd(OAc) <sub>2</sub> | I(III)-OMe      | TfOH, DMSO, rt             | NR                    |
| 5     | Pd(OAc) <sub>2</sub> | I(III)-OMe      | TfOH, TFEA, rt             | 30                    |
| 6     | Pd(OAc) <sub>2</sub> | I(III)-OMe      | TfOH, TFEA:DCE=0.2:0.8, rt | 50                    |
| 7     | Pd(OAc) <sub>2</sub> | I(III)-OMe      | TfOH, TFEA:DCE=0.4:0.6, rt | 60                    |

<sup>a</sup>Conversion ratio determined by <sup>1</sup>H NMR using 4-Nitroaldehyde as internal standard.

### IV Effects of TfOH

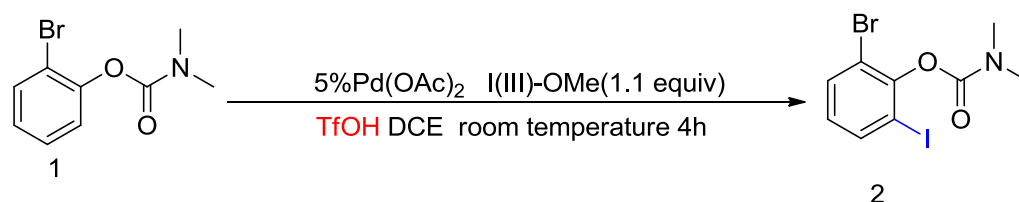

| entry | catalyst             | iodine reagents | conditions           | yield(%) <sup>a</sup> |
|-------|----------------------|-----------------|----------------------|-----------------------|
| 1     | Pd(OAc) <sub>2</sub> | I(III)-OMe      | no TfOH, DCE, rt     | NR                    |
| 2     | Pd(OAc) <sub>2</sub> | I(III)-OMe      | 0.5 eq TfOH, DCE, rt | NR                    |
| 3     | Pd(OAc) <sub>2</sub> | I(III)-OMe      | 1.0 eq TfOH, DCE, rt | 66                    |
| 4     | Pd(OAc) <sub>2</sub> | I(III)-OMe      | 1.5 eq TfOH, DCE, rt | 68                    |
| 5     | Pd(OAc) <sub>2</sub> | I(III)-OMe      | 2.0 eq TfOH, DCE, rt | 70 <sup>b</sup>       |
| 6     | Pd(OAc) <sub>2</sub> | I(III)-OMe      | 3.0 eq TfOH, DCE, rt | 62                    |

<sup>a</sup>Conversion ratio determined by <sup>1</sup>H NMR using 4-Nitrobenzaldehyde as internal standard.

<sup>b</sup>Isolated yield

## V Effects of other factors

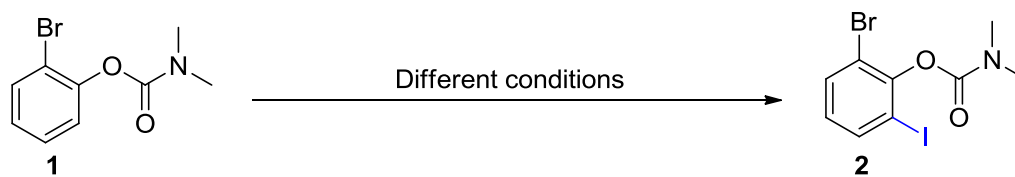

| entry | catalyst                                                  | iodine reagents                        | conditions                                  | yield(%) <sup>a</sup> |
|-------|-----------------------------------------------------------|----------------------------------------|---------------------------------------------|-----------------------|
| 1     | Pd(OAc) <sub>2</sub>                                      | I <sub>2</sub> + PhI(OAc) <sub>2</sub> | K <sub>2</sub> CO <sub>3</sub> , DMF, 100°C | NR <sup>c</sup>       |
| 2     | Pd(OAc) <sub>2</sub>                                      | I <sub>2</sub>                         | CsOAc, NaHCO <sub>3</sub> , 65°C            | NR <sup>d</sup>       |
| 3     | [Rh(Cp*Cl <sub>2</sub> ) <sub>2</sub> ]                   | NIS                                    | AgSbF <sub>6</sub> , PivOH, 120°C           | 8                     |
| 4     | Pd(OAc) <sub>2</sub>                                      | NIS                                    | AcOH, 100°C                                 | NR <sup>e</sup>       |
| 5     | [Rh(Cp*Cl <sub>2</sub> ) <sub>2</sub> ]                   | I(III)-OMe                             | TfOH, DCE, rt                               | NR                    |
| 6     | PdCl <sub>2</sub>                                         | I(III)-OMe                             | TfOH, DCE, rt                               | NR                    |
| 7     | no Pd(OAc) <sub>2</sub>                                   | I(III)-OMe                             | TfOH, DCE, rt                               | NR                    |
| 8     | [Ru(p-cymene) <sub>2</sub> Cl <sub>2</sub> ] <sub>2</sub> | I(III)-OMe                             | TfOH, DCE, rt                               | trace                 |

<sup>a</sup>Conversion ratio determined by <sup>1</sup>H NMR using 4-Nitrobenzaldehyde as internal standard.

<sup>c</sup>DMF as the solvent, 36h. <sup>d</sup>t-AmOH/DMF, 20h. <sup>e</sup>AcOH as the solvent, 12h.

## General procedure

### I Synthesis of carbamates<sup>[1]</sup>

A mixture of the phenol (1.0 equiv) and Me<sub>2</sub>NCOCl (1.5 equiv) and K<sub>2</sub>CO<sub>3</sub> (1.5 equiv) in MeCN was refluxed for 6 h. The reaction mixture was cooled to room temperature and concentrated under a vacuum. The residue was dissolved in H<sub>2</sub>O and extracted with dichloroethane. The organic fractions were combined and then washed successively with 1 N NaOH and water. Finally the organic layer was separated, dried over anhydrous Na<sub>2</sub>SO<sub>4</sub>, and concentrated under a vacuum to yield the corresponding carbamates.

### II Synthesis of iodinated carbamates

Substituted carbamates (1.0 equiv), I-OMe or I-OTs (1.1-2.0 equiv), Pd(OAc)<sub>2</sub> (0.05 equiv) were dissolved in commercial dichloroethane in a 15 mL sealed tube. Following that, TfOH (0.5~3.0 equiv) was added into the reaction solution. Then the reaction mixture was stirred at room temperature for 1.5-18.5 h. The reaction was monitored by TLC. After completion of the reaction, saturated NaHCO<sub>3</sub> was added to quench the reaction. The reaction mixture was diluted with dichloromethane and washed once with saturated aqueous NaHCO<sub>3</sub>. Then organic layer was dried over anhydrous Na<sub>2</sub>SO<sub>4</sub> and concentrated on rotavapor under reduced pressure. Finally the residue was purified by silical gel column chromatography to give corresponding iodinated products.

### III Synthesis of 1-Methoxy-1,2-benziodoxol-3-(1H)-one<sup>[2,3]</sup>

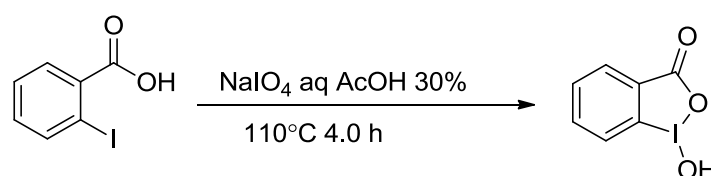

Step 1: Following the literature's method, in a 100mL round-bottom flask, 2-iodobenzoic acid (5 g, 20 mmol) and NaIO<sub>4</sub> (4.53 g, 21 mmol, as oxidant) were

added into 30% HOAc/H<sub>2</sub>O solution (30 mL). Then the reaction was heated up to 110 °C and stirred for 4 h under reflux. After that, the flask was cooled down to room temperature and ice water (ca. 50 mL) was purged into the bottle. The mixture was kept stirring until the crystal precipitated (about 10min). The crystals were filtered, washed with ice water, and dried in vacuo.

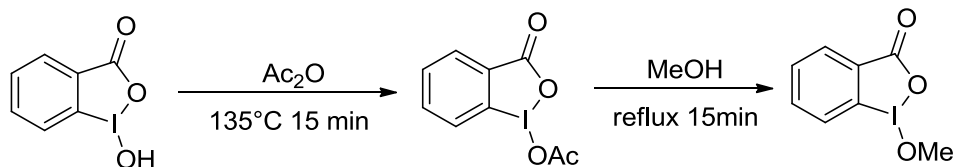

Step 2: In a 100 mL round-bottom flask, 1-hydroxy-1,2-benziodoxol-3-(1H)-one was subjected into Ac<sub>2</sub>O (14 mL) and the system was quickly heated up to 135° C until the solid is completely dissolved. Then, the flask was cooled down to room temperature and put into a refrigerator under -20° C until the crystals precipitated from the solution. Subsequently, the solid was filtered and washed with water for 3 times. Finally, the product was dried in vacuo to afford a white solid. After heating the above-obtained solid in MeOH (35 mL) to reflux for 15 min until a clear, colorless solution was obtained and cooling to ambient temperature followed by crystallization at -20° C, filtration, washing with a minimal amount of MeOH, and drying under vacuum, the desired product was obtained as white crystals.

<sup>1</sup>H NMR (300 MHz, CDCl<sub>3</sub>): δ (ppm) 4.26 (s, 3H), 7.64 – 7.76 (m, 2H), 7.88 (t, *J* = 7.7 Hz, 1H), 8.24 (d, *J* = 7.7 Hz, 1H)

#### IV Synthesis of 1-(p-Toluenesulfonyloxy)-1,2-benziodoxol-3(1H)-one<sup>[4]</sup>

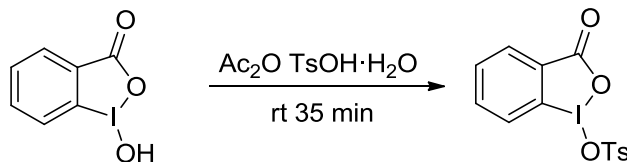

To a stirred mixture of 2-iodosylbenzoic acid (3.17 g, 12 mmol) in acetic anhydride (6 mL), TsOH·H<sub>2</sub>O (4.56 g, 24 mmol) was added at room temperature. After 5 min stirring a slightly exothermic reaction began, and the mixture turned into a clear solution. The solution was additionally stirred for 30 min until a white microcrystalline precipitate formed. Then the reaction mixture was diluted with dry ether (20 mL), the precipitate was filtered, washed with anhydrous ether (3x20 mL), and dried in vacuo to afford analytically pure product yield 3.90 g (79%).

<sup>1</sup>H NMR (CDCl<sub>3</sub>/CF<sub>3</sub>COOH, 20:1): δ (ppm) 8.30 (d, 1H, *J* = 8 Hz), 8.09 (t, 1H, *J* = 8 Hz), 7.94 (d, 1H, *J* = 8 Hz), 7.80 (t, 1H, *J* = 8 Hz), 7.71 (d, 2H, *J* = 8 Hz), 7.29 (d, 2H, *J* = 8 Hz), 2.40 (s, 3H).

#### V Mechanism studies

In NMR tube, I(III)-OMe (0.055 mmol, 15 mg) was dissolved in CDCl<sub>3</sub> (0.4 mL), then TfOH (0.1 mmol, 9 μL) was added. After 1.0 h, the reaction mixture directly monitored by <sup>1</sup>H NMR.

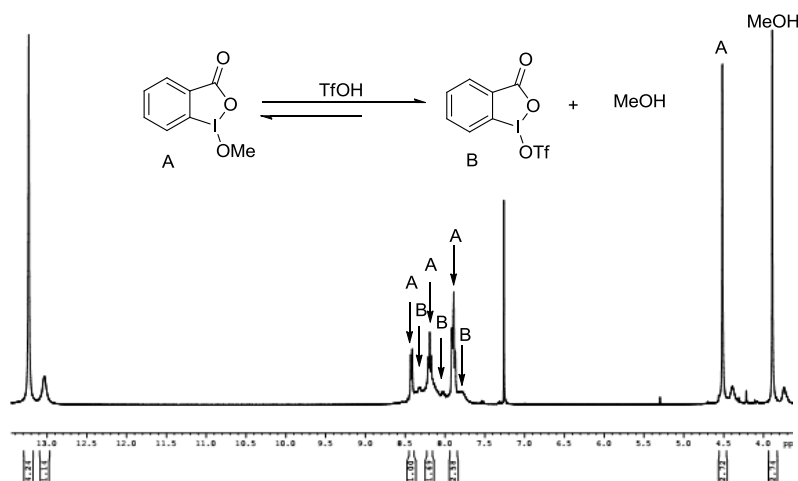

Then 1 uL of MeOH was added to confirm the peak of methanol.

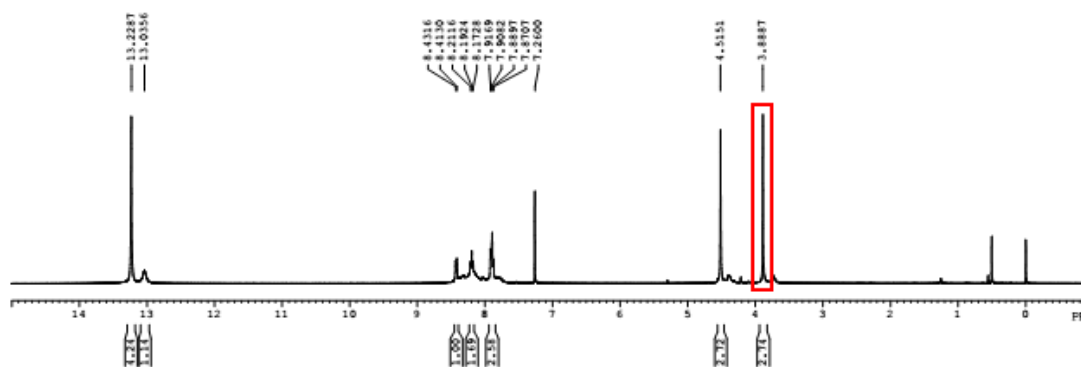

Add MeOH(1uL)

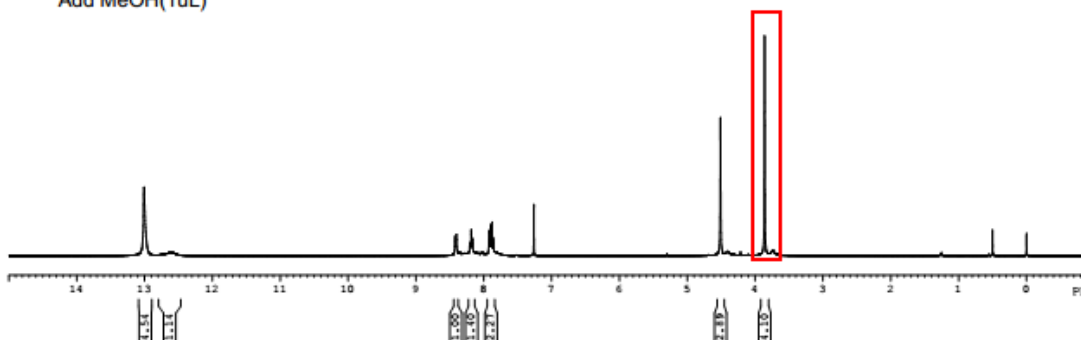

In NMR tube, 2-fluorophenyl dimethylcarbamate (0.05 mmol, 9 mg), I-OMe (1.1 equiv, 15 mg) and Pd(OAc)<sub>2</sub> (0.05 equiv, 0.6 mg) were dissolved in CDCl<sub>3</sub>. Following that, TfOH (2.0 equiv, 9 uL) was added into the reaction solution. The reaction mixtures was monitored by <sup>1</sup>H NMR at different time points.

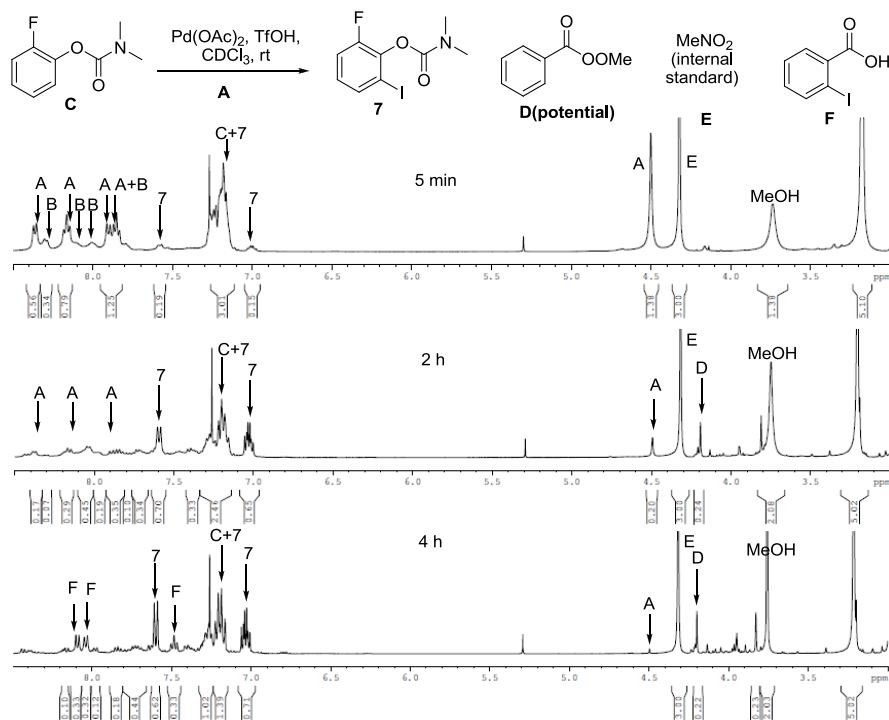

## VI Intermolecular Competition Experiments

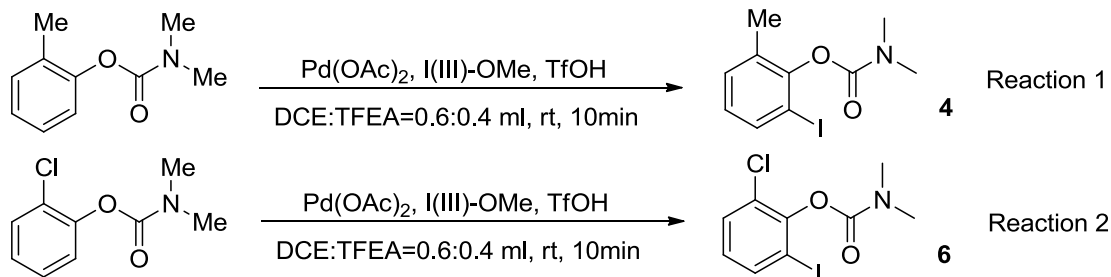

To two separated sealed tubes, following the general procedure **I**, o-tolyl dimethylcarbamate (36 mg, 0.20 mmol) or 2-chlorophenyl dimethylcarbamate (40 mg, 0.20 mmol),  $\text{Pd}(\text{OAc})_2$  (2.3 mg, 0.01 mmol), I-OMe (61 mg, 0.22 mmol), TfOH (1.0 equiv, 18  $\mu\text{L}$ ) and DCE:TFEA = 0.6:0.4 ml was added. The mixture was stirred at room temperature. After 10 min, two reactions were quenched and added 4-nitrobenzaldehyde as internal standard. Then, the mixture was washed once with saturated aqueous  $\text{NaHCO}_3$  and extracted with dichloromethane and concentrated on rotavapor under reduced pressure. The conversion ratio was determined by crude <sup>1</sup>H-NMR. The ratio of (**4**) to (**6**) was 10.3.

## VII Procedure for preliminary mechanistic study

1. Preparation of 2-deuterio phenyl dimethylcarbamate<sup>[5, 6,7]</sup>.

In an oven-dried 100-mL round-bottomed flask, a solution of 2-bromophenol (1g, 5.78 mmol) and  $\text{Et}_2\text{O}$  (15 mL) were cooled to 0 °C. After 5 min, t-BuLi (1.6 M, 8 mL, 12.7 mmol) was added dropwise over 10 min. The mixture was stirred for 3.5 h at 0 °C. Then,  $\text{D}_2\text{O}$  (500 mg, 24.9 mmol) was added via syringe. The mixture was then warmed to room temperature slowly overnight. The cloudy, white mixture was diluted

with H<sub>2</sub>O (20 mL). The layers were separated. The organic layer was washed with H<sub>2</sub>O (20 mL x 3), dried (Na<sub>2</sub>SO<sub>4</sub>), filtered and concentrated.

Following the general procedure I, the above compounds without further purification (5.78 mmol, 1.0 equiv), K<sub>2</sub>CO<sub>3</sub> (1.2 g, 8.68 mmol), dimethylcarbamoyl chloride (6.4 mL, 6.94 mmol) and MeCN (15 mL) was added. The reaction mixture was refluxed for 4h. After completion of the reaction, the residue was purified by silical gel column chromatography (Petroleum ether: Ethyl acetate = 10:1). Finally, desired product (670 mg) was isolated in 70% yield.

<sup>1</sup>H NMR (400 MHz, CDCl<sub>3</sub>) δ (ppm) 7.37-7.34 (m, 2H), 7.19 (t, *J* = 7.40 Hz, 1H), 7.11 (d, *J* = 8.40 Hz, 1H), 3.10 (s, 3H), 3.01 (s, 3H); <sup>13</sup>C NMR (100 MHz, CDCl<sub>3</sub>) δ (ppm) 155.0, 151.6, 129.3, 129.2, 125.2, 121.8, 121.6 (*J*<sub>C-D</sub> = 24.5 Hz), 36.8, 36.5; LRMS (ESI) calcd for C<sub>9</sub>H<sub>11</sub>DNO<sub>2</sub> [M+H]<sup>+</sup>: 167.09, found 167.12

## 2. Intramolecular experiments

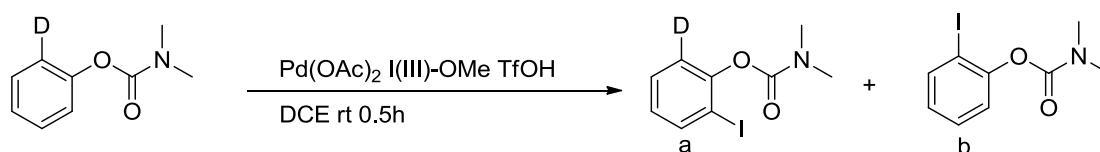

Following the general procedure I, to a 15 mL sealed tube, 2-deuterio phenyl dimethylcarbamate (33 mg, 0.20 mmol), I-OMe (61 mg, 0.22 mmol), Pd(OAc)<sub>2</sub> (2.3 mg, 0.01 mmol) and TfOH (0.5 equiv, 9 uL) in DCE (1 ml) was stirred at room temperature for 0.5 h. Then the mixture was quenched, washed once with saturated aqueous NaHCO<sub>3</sub>, extracted by dichloromethane and concentrated on rotavapor under reduced pressure. The conversion ratio was determined by crude <sup>1</sup>H-NMR. <sup>1</sup>H-NMR showed *k*<sub>H</sub>/*k*<sub>D</sub> = 1.0.

## VIII Deprotection of products in one pot.

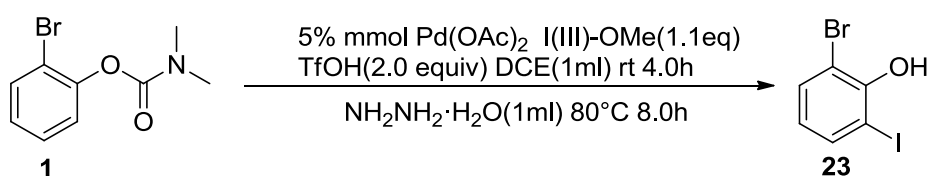

After the completion of the first step, without purification, hydrazine hydride (1.0 mL) was added to the mixture as solvent and stirred at 80°C until the reaction finished. When the deprotection was finished, the mixture was acidified by conc. HCl, washed by water and extracted by dichloromethane. Then organic layer was dried over anhydrous Na<sub>2</sub>SO<sub>4</sub> and concentrated on rotavapor under reduced pressure. Finally the residue was purified by silical gel column chromatography to give corresponding deprotected products. The yield was 50%.

<sup>1</sup>H NMR (400 MHz, CDCl<sub>3</sub>) δ (ppm) 7.65 (d, *J* = 7.88 Hz, 1H), 7.46 (d, *J* = 7.96 Hz, 1H), 6.56 (t, *J* = 7.92 Hz, 1H), 5.90 (s, 1H); <sup>13</sup>C-NMR (100 MHz, CDCl<sub>3</sub>) δ (ppm) 151.6, 138.7, 132.9, 123.5, 108.8, 83.4; LRMS (ESI) calcd for C<sub>6</sub>H<sub>4</sub>BrIO [M-H]<sup>-</sup>: 297.90, found 296.92

## IX Applications

### 1. Sequential Suzuki coupling and C-H iodination reactions



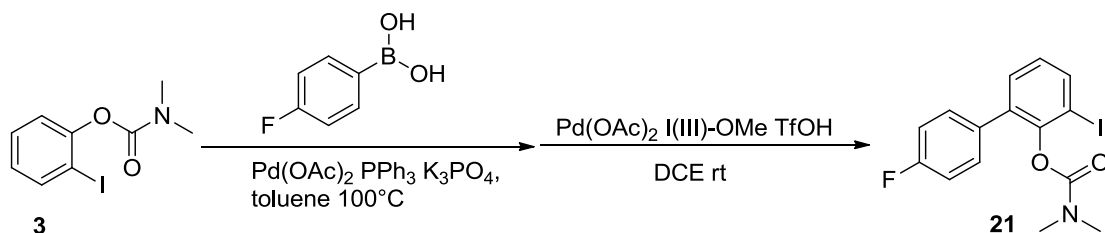

In an oven-dried 25-mL round-bottom flask, a mixture of compound **3** (150 mg, 0.5 mmol), (4-fluorophenyl)boronic acid (139 mg, 1.0 mmol), Pd(OAc)<sub>2</sub> (2.3 mg, 0.01 mmol), PPh<sub>3</sub> (6 mg, 0.02 mmol), K<sub>3</sub>PO<sub>4</sub> (213 mg, 1.0 mmol) was dissolved in toluene (1 ml) under argon. The mixture was stirred overnight at 100 °C. After completion of the reaction, the residue was purified by silical gel column chromatography (Petroleum ether: Ethyl acetate = 10:1). The Suzuki coupling product was isolated in 67% yield as white solid.

Then Following the general procedure **II**, a mixture of 4'-fluoro-[1,1'-biphenyl]-2-yl dimethylcarbamate (26 mg, 0.10 mmol), I-OMe (31 mg, 0.22 mmol), Pd(OAc)<sub>2</sub> (1.2 mg, 0.01 mmol) and TfOH (1.5 equiv, 14 uL) in DCE (1 ml) was stirred at room temperature for 2.0 h. After completion of the reaction, the residue was purified by silical gel column chromatography (Petroleum ether: Ethyl acetate = 9:1). Finally, compound **21** (25 mg) was isolated in 65% yield as a colorless oil. <sup>1</sup>H NMR (400 MHz, CDCl<sub>3</sub>) δ (ppm) 7.80 (d, *J* = 8.00 Hz, 1H), 7.38 (dd, *J* = 7.20, 6.00 Hz, 2H), 7.30 (d, *J* = 7.60 Hz, 1H), 7.08 (t, *J* = 8.4 Hz, 2H), 7.01 (t, *J* = 8.00 Hz, 1H), 3.00 (s, 3H), 2.88 (s, 3H); <sup>19</sup>F-NMR (400 MHz, CDCl<sub>3</sub>) -114.66 (s, 3F); <sup>13</sup>C NMR (100 MHz, CDCl<sub>3</sub>) δ (ppm) 162.5 (d, *J*<sub>C-F</sub> = 239 Hz, 1C), 153.1, 149.0, 138.7, 136.2, 133.7 (d, *J*<sub>C-F</sub> = 3 Hz, 1C), 131.0, 130.7 (d, *J*<sub>C-F</sub> = 8 Hz, 2C), 127.6, 115.2 (d, *J*<sub>C-F</sub> = 22 Hz, 2C), 93.2, 37.0, 36.7; LRMS (ESI) calcd for C<sub>15</sub>H<sub>13</sub>FINO<sub>2</sub> [M+H]<sup>+</sup>: 386.18, found 385.90

## 2. sp<sup>3</sup> C-H arylation reaction<sup>[8]</sup>

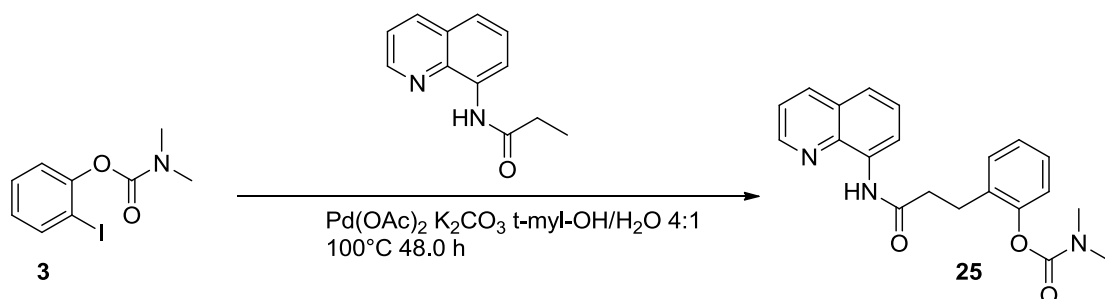

In an oven-dried 25-mL round-bottom flask, a mixture of compound **3** (87 mg, 0.3 mmol), N-(quinolin-8-yl)propionamide (20 mg, 0.1 mmol), K<sub>2</sub>CO<sub>3</sub> (7 mg, 0.25 mmol) were dissolved in 2-Methyl-2-butanol:H<sub>2</sub>O=0.8:0.2 ml. The mixture was stirred for 48 h at 100 °C. After completion of the reaction, the residue was purified by silical gel column chromatography (Petroleum ether: Ethyl acetate = 4:1). Finally, compound **25** (22 mg) was isolated in 60% yield as a colorless oil. <sup>1</sup>H NMR (400 MHz, CDCl<sub>3</sub>) δ (ppm) 8.80-8.75 (m, 2H), 8.13 (d, *J* = 8.20 Hz, 1H), 7.55-7.48 (m, 2H), 7.44-7.41 (m, 1H), 7.32 (d, *J* = 7.36 Hz, 1H), 7.25-7.21 (m, 1H), 7.16-7.10 (m, 2H), 3.16 (s, 3H), 3.10 (t, *J* = 8.32 Hz, 2H), 3.02 (s, 3H), 2.84 (t, *J* = 7.44 Hz, 2H); <sup>13</sup>C NMR (100 MHz, CDCl<sub>3</sub>) δ (ppm) 170.8, 154.9, 149.8, 148.2, 138.3, 136.4, 134.5, 132.9, 130.0, 128.0,

127.5, 127.4, 125.8, 122.9, 121.7, 121.5, 116.6, 38.5, 36.9, 36.6, 26.2; LRMS (ESI) calcd for C<sub>21</sub>H<sub>21</sub>N<sub>3</sub>O<sub>3</sub> [M+H]<sup>+</sup>: 364.42, found 363.38

### 3. Cyanation reaction<sup>[9]</sup>

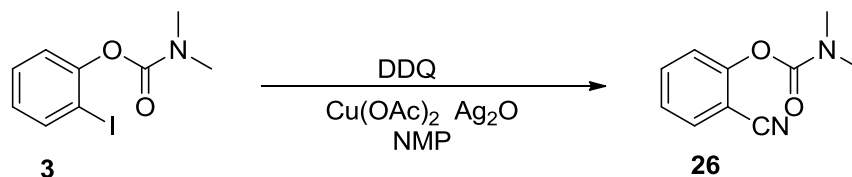

Under air, a reaction tube was charged with compound **3** (58 mg, 0.2 mmol), DDQ (45.2mg, 0.2 mmol), Cu(OAc)<sub>2</sub> (36.3 mg, 0.2 mol), Ag<sub>2</sub>O (46.3 mg, 0.3 mmol) and NMP (2mL). The mixture was stirred at 120 °C for 22 h. After the completion of the reaction, the reaction mixture was diluted with dichloromethane and washed once with saturated aqueous NaHCO<sub>3</sub>. Then organic layer was dried over anhydrous Na<sub>2</sub>SO<sub>4</sub> and concentrated on rotavapor under reduced pressure. Finally the residue was purified by silical gel column chromatography to give compound **26** (32 mg) in 85% yield as a colorless oil. <sup>1</sup>H NMR (400 MHz, CDCl<sub>3</sub>) δ (ppm) 7.65-7.58 (m, 2H), 7.40 (d, *J* = 8.32 Hz, 1H), 6.89 (d, *J* = 7.76 Hz, 1H), 3.18 (s, 3H), 3.04 (s, 3H); <sup>13</sup>C NMR (100 MHz, CDCl<sub>3</sub>) δ (ppm) 153.4, 153.3, 134.0, 133.1, 125.6, 123.5, 115.7, 106.9, 37.1, 36.8; LRMS (ESI) calcd for C<sub>10</sub>H<sub>10</sub>N<sub>2</sub>O<sub>2</sub> [M+H]<sup>+</sup>: 191.21, found 191.66

### References

1. Alex, J.; Kenneth, M. N. *J. Org. Chem.* **2012**, *77*, 5600.
2. Wang, Y.; Zhang, L.; Yang, Y.; Zhang, P.; Du, Z.; Wang, C. *J. Am. Chem. Soc.* **2013**, *135*, 18048.
3. A. Togni et al. *Chemistry - A European Journal.* **2006**, *12*, 2583.
4. Viktor V. Zhdankin.; Chris J. Kuehl.; Alexei P. Krasutsky.; Jason T. Bolz.; Angela Simonsen. *J. Org. Chem.* **1996**, *61*, 6549.
5. John, J. T.; Irene, Q. E.; *J. Org. Chem.* **1984**, *49*, 5267.
6. Cong, Y. W.; Isabel, P.; Frank, G. *J. Am. Chem. Soc.* **2009**, *131*, 4194.
7. Danielle, M. S.; Srimoyee, D.; Mary, P. W. *Org. Lett.* **2011**, *13*, 3490.
8. Shabashov, D.; Daugulis, O. *J. Am. Chem. Soc.* **2010**, *132*, 3965.
9. Chen, F.; Jiang Cheng, J. *Chinese Journal of Chemistry.* **2013**, *31*, 449.

## Date of products

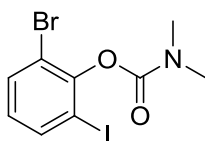

### 6-bromo-2-iodophenyl dimethylcarbamate (2)

Following the general procedure **II**, a mixture of 2-bromophenyl dimethylcarbamate (49 mg, 0.20 mmol), I-OMe (61 mg, 0.22 mmol), Pd(OAc)<sub>2</sub> (2.3 mg, 0.01 mmol) and TfOH (2.0 equiv, 36 uL) in DCE (1 ml) was stirred at room temperature for 4 h. After completion of the reaction, the residue was purified by silical gel column chromatography (Petroleum ether: Ethyl acetate = 9:1). Finally, compound **2** (52 mg) was isolated in 70% yield as a colorless oil. <sup>1</sup>H NMR (400 MHz, CDCl<sub>3</sub>) δ (ppm) 7.74 (d, *J* = 7.92 Hz, 1H), 7.56 (d, *J* = 8.00 Hz, 1H), 6.81 (t, *J* = 7.92 Hz, 1H), 3.20 (s, 3H), 3.06 (s, 3H); <sup>13</sup>C-NMR (100 MHz, CDCl<sub>3</sub>) δ (ppm) 152.4, 149.4, 138.4, 133.5, 128.4, 117.4, 92.8, 37.2, 36.9; LRMS (ESI) calcd for C<sub>9</sub>H<sub>9</sub>BrINO<sub>2</sub> [M+H]<sup>+</sup>: 370.99, found 371.71.

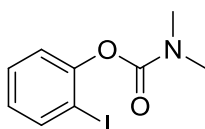

### 2-iodophenyl dimethylcarbamate (3)

Following the general procedure **II**, a mixture of phenyl dimethylcarbamate (33 mg, 0.20 mmol), I-OMe (61 mg, 0.22 mmol), Pd(OAc)<sub>2</sub> (2.3 mg, 0.01 mmol) and TfOH (0.5 equiv, 9 uL) in TFEA:DCE=0.2:0.8 ml was stirred at room temperature for 9.5 h. After completion of the reaction, the residue was purified by silical gel column chromatography (Petroleum ether: Ethyl acetate = 9:1). Finally, compound **3** (37 mg) was isolated in 64% yield as a colorless oil. <sup>1</sup>H NMR (400 MHz, CDCl<sub>3</sub>) δ (ppm) 7.80 (d, *J* = 7.88 Hz, 1H), 7.34 (t, *J* = 7.56 Hz, 1H), 7.19 (d, *J* = 8.00 Hz, 1H), 6.94 (t, *J* = 7.48 Hz, 1H), 3.19 (s, 3H), 3.04 (s, 3H); <sup>13</sup>C NMR (100 MHz, CDCl<sub>3</sub>) δ (ppm) 153.8, 151.8, 139.2, 129.4, 127.1, 123.5, 90.9, 37.0, 36.9; LRMS (ESI) calcd for C<sub>9</sub>H<sub>10</sub>INO<sub>2</sub> [M+H]<sup>+</sup>: 292.09, found 292.20.

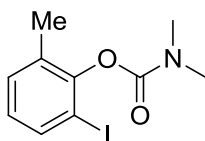

### 2-iodo-6-methylphenyl dimethylcarbamate (4)

Following the general procedure **II**, a mixture of o-tolyl dimethylcarbamate (36 mg, 0.20 mmol), I-OMe (61.0 mg, 0.22 mmol), Pd(OAc)<sub>2</sub> (2.3 mg, 0.01 mmol) and TfOH (0.5 equiv, 9 uL) in TFEA (1 ml) was stirred at room temperature for 4.5 h. After completion of the reaction, the residue was purified by silical gel column chromatography (Petroleum ether: Ethyl acetate = 9:1). Finally, compound **4** (39 mg) was isolated in 64% yield as a colorless oil. <sup>1</sup>H NMR (400 MHz, CDCl<sub>3</sub>) δ (ppm) 7.62 (d, *J* = 7.92 Hz, 1H), 7.17 (d, *J* = 7.56 Hz, 1H), 6.85 (t, *J* = 7.72 Hz, 1H), 3.20 (s, 3H), 3.05 (s, 3H), 2.24 (s, 3H); <sup>13</sup>C NMR (100 MHz, CDCl<sub>3</sub>) δ (ppm) 153.2, 150.3, 136.8,

132.9, 131.2, 127.3, 92.1, 37.0, 36.8, 17.4; LRMS (ESI) calcd for C<sub>10</sub>H<sub>12</sub>I<sub>2</sub>NO<sub>2</sub> [M+H]<sup>+</sup>: 306.12, found 306.29.

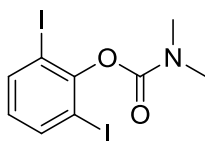

### 2,6-diiodophenyl dimethylcarbamate (5)

Following the general procedure **II**, a mixture of 2-iodophenyl dimethylcarbamate (29 mg, 0.10 mmol), I-OMe (31 mg, 0.11 mmol), Pd(OAc)<sub>2</sub> (1.2 mg, 0.005 mmol) and TfOH (2.0 equiv, 18 uL) in DCE (1 ml) was stirred at room temperature for 2 h. After completion of the reaction, the residue was purified by silical gel column chromatography (Petroleum ether: Ethyl acetate = 9:1). Finally, compound **5** (25 mg) was isolated in 60% yield as a white solid. <sup>1</sup>H NMR (400 MHz, CDCl<sub>3</sub>) δ (ppm) 7.78 (d, *J* = 7.88 Hz, 2H), 6.65 (t, *J* = 7.88 Hz, 1H), 3.21 (s, 3H), 3.07 (s, 3H); <sup>13</sup>C NMR (100 MHz, CDCl<sub>3</sub>) δ (ppm) 152.3, 151.9, 139.5, 128.9, 91.5, 37.2, 37.0; LRMS (ESI) calcd for C<sub>9</sub>H<sub>9</sub>I<sub>2</sub>NO<sub>2</sub> [M+H]<sup>+</sup>: 417.99, found 417.68.

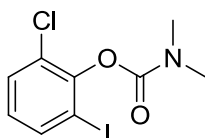

### 2-chloro-6-iodophenyl dimethylcarbamate (6)

Following the general procedure **II**, a mixture of 2-chlorophenyl dimethylcarbamate (40 mg, 0.20 mmol), I-OMe (61 mg, 0.22 mmol), Pd(OAc)<sub>2</sub> (2.3 mg, 0.01 mmol) and TfOH (2.0 equiv, 36 uL) in DCE (1 ml) was stirred at room temperature for 4 h. After completion of the reaction, the residue was purified by silical gel column chromatography (Petroleum ether: Ethyl acetate = 9:1). Finally, compound **6** (39 mg) was isolated in 60% yield as a colorless oil. <sup>1</sup>H NMR (400 MHz, CDCl<sub>3</sub>) δ (ppm) 7.70 (d, *J* = 7.92 Hz, 1H), 7.40 (d, *J* = 7.92 Hz, 1H), 6.89 (t, *J* = 8.00 Hz, 1H), 3.20 (s, 3H), 3.06 (s, 3H); <sup>13</sup>C NMR (100 MHz, CDCl<sub>3</sub>) δ (ppm) 152.5, 148.4, 137.6, 130.4, 128.4, 128.0, 93.0, 37.2, 36.9; LRMS (ESI) calcd for C<sub>9</sub>H<sub>9</sub>ClINO<sub>2</sub> [M+H]<sup>+</sup>: 326.54, found 325.81.

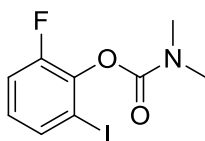

### 6-fluoro-2-iodophenyl dimethylcarbamate (7)

Following the general procedure **II**, a mixture of 2-fluorophenyl dimethylcarbamate (58 mg, 0.20 mmol), I-OMe (111 mg, 0.40 mmol), Pd(OAc)<sub>2</sub> (2.3 mg, 0.01 mmol) and TfOH (3.0 equiv, 54 uL) in DCE (1 ml) was stirred at room temperature for 12.0 h. After completion of the reaction, the residue was purified by silical gel column chromatography (Petroleum ether: Ethyl acetate = 9:1). Finally, compound **7** (62 mg) was isolated in 62% yield as a colorless solid. <sup>1</sup>H NMR (400 MHz, CDCl<sub>3</sub>) δ (ppm) 7.56 (d, *J* = 8.04 Hz, 1H), 7.15-7.11 (m, 1H), 6.93 (td, *J*<sub>1</sub> = 8.20 Hz, *J*<sub>2</sub> = 5.20 Hz, 1H), 3.19 (s, 3H), 3.05 (s, 3H); <sup>19</sup>F-NMR (400 MHz, CDCl<sub>3</sub>) -123.80 (s, 1F); <sup>13</sup>C NMR

(100 MHz, CDCl<sub>3</sub>)  $\delta$  (ppm) 154.9 (d,  $J_{C-F}$  = 252 Hz, 1C), 152.7, 140.4 (d,  $J_{C-F}$  = 14 Hz, 1C), 134.1 (d,  $J_{C-F}$  = 3 Hz, 1C), 128.0 (d,  $J_{C-F}$  = 7 Hz, 1C), 116.9 (d,  $J_{C-F}$  = 19 Hz, 1C), 92.7, 37.2, 36.9; LRMS (ESI) calcd for C<sub>9</sub>H<sub>9</sub>FINO<sub>2</sub> [M+H]<sup>+</sup>: 310.08, found 309.97.

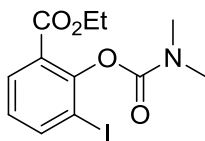

### Ethyl 2-((dimethylcarbamoyl)oxy)-3-iodobenzoate (**8**)

Following the general procedure **II**, a mixture of ethyl 2-((dimethylcarbamoyl)oxy)benzoate (52 mg, 0.20 mmol), I-OTs (92.0 mg, 0.22 mmol), Pd(OAc)<sub>2</sub> (13.8 mg, 0.06 mmol) and TfOH (0.5 equiv, 9  $\mu$ L) in DCE (1 ml) was stirred at 60 °C for 3.0 h. After completion of the reaction, the residue was purified by silical gel column chromatography (Petroleum ether: Ethyl acetate = 9:1). Finally, compound **8** (32 mg) was isolated in 45% yield as a colorless oil. <sup>1</sup>H NMR (400 MHz, CDCl<sub>3</sub>)  $\delta$  (ppm) 7.98-7.95 (m, 2H), 7.01 (t,  $J$  = 7.84 Hz, 1H), 4.31 (q,  $J$  = 7.16 Hz, 2H), 3.20 (s, 3H), 3.05 (s, 3H), 1.34 (t,  $J$  = 7.12 Hz, 3H); <sup>13</sup>C-NMR (100 MHz, CDCl<sub>3</sub>)  $\delta$  (ppm) 164.2, 153.3, 151.1, 143.2, 131.9, 127.0, 125.8, 94.1, 61.4, 37.0, 36.9, 14.2; LRMS (ESI) calcd for C<sub>12</sub>H<sub>14</sub>INO<sub>4</sub> [M+H]<sup>+</sup>: 364.16, found 364.25.

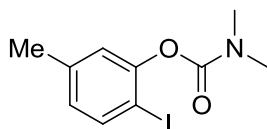

### 2-iodo-5-methylphenyl dimethylcarbamate (**9**)

Following the general procedure **II**, a mixture of m-tolyl dimethylcarbamate (36 mg, 0.20 mmol), I-OMe (61 mg, 0.22 mmol), Pd(OAc)<sub>2</sub> (2.3 mg, 0.01 mmol) in TFEA:DCE=0.4:0.6 ml was stirred at room temperature for 5.0 h. After completion of the reaction, the residue was purified by silical gel column chromatography (Petroleum ether: Ethyl acetate = 9:1). Finally, compound **9** (40 mg) was isolated in 66% yield as a colorless oil. <sup>1</sup>H NMR (400 MHz, CDCl<sub>3</sub>)  $\delta$  (ppm) 7.64 (d,  $J$  = 8.04 Hz, 1H), 7.01 (s, 1H), 6.76 (d,  $J$  = 7.96 Hz, 1H), 3.17 (s, 3H), 3.03 (s, 3H), 2.31 (s, 3H); <sup>13</sup>C NMR (100 MHz, CDCl<sub>3</sub>)  $\delta$  (ppm) 154.0, 151.6, 139.9, 138.7, 128.2, 124.2, 86.6, 37.0, 36.8, 21.1; LRMS (ESI) calcd for C<sub>10</sub>H<sub>12</sub>INO<sub>2</sub> [M+H]<sup>+</sup>: 306.12, found 306.19.

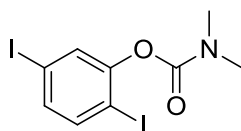

### 2,5-diiodophenyl dimethylcarbamate (**10**)

Following the general procedure **II**, a mixture of 3-iodophenyl dimethylcarbamate (58 mg, 0.20 mmol), I-OTs (92 mg, 0.22 mmol), Pd(OAc)<sub>2</sub> (2.3 mg, 0.01 mmol) and TfOH (1.0 equiv, 18  $\mu$ L) in TFEA (1 ml) was stirred at room temperature for 3.0 h. After completion of the reaction, the residue was purified by silical gel column chromatography (Petroleum ether: Ethyl acetate = 9:1). Finally, compound **10** (61 mg) was isolated in 73% yield as a white solid. <sup>1</sup>H NMR (400 MHz, CDCl<sub>3</sub>)  $\delta$  (ppm)

7.53(d,  $J = 1.92$  Hz, 1H), 7.49 (d,  $J = 8.32$  Hz, 1H), 7.25 (dd,  $J_1 = 8.32$  Hz,  $J_2 = 1.96$  Hz, 1H), 3.16 (s, 3H), 3.04 (s, 3H);  $^{13}\text{C}$  NMR (100 MHz,  $\text{CDCl}_3$ )  $\delta$  (ppm) 153.4, 152.3, 140.3, 136.2, 132.6, 93.2, 90.6, 37.0, 36.9; LRMS (ESI) calcd for  $\text{C}_9\text{H}_{10}\text{BrClINO}_2$   $[\text{M}+\text{H}]^+$ : 417.98, found 418.17.

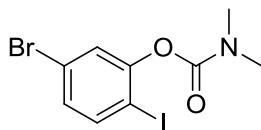

### 5-bromo-2-iodophenyl dimethylcarbamate (11)

Following the general procedure **II**, a mixture of 3-bromophenyl dimethylcarbamate (49 mg, 0.20 mmol), I-OMe (84 mg, 0.30 mmol),  $\text{Pd}(\text{OAc})_2$  (2.3 mg, 0.01 mmol) and TfOH (2.5 equiv, 45  $\mu\text{L}$ ) in DCE (1 ml) was stirred at room temperature for 6.0 h. After completion of the reaction, the residue was purified by silical gel column chromatography (Petroleum ether: Ethyl acetate = 9:1). Finally, compound **11** (55 mg) was isolated in 74% yield as a colorless oil.  $^1\text{H}$  NMR (400 MHz,  $\text{CDCl}_3$ )  $\delta$  (ppm) 7.63 (d,  $J = 8.44$  Hz, 1H), 7.37 (d,  $J = 2.04$  Hz, 1H), 7.08 (dd,  $J_1 = 8.44$  Hz,  $J_2 = 2.00$  Hz, 1H), 3.17 (s, 3H), 3.04 (s, 3H);  $^{13}\text{C}$ -NMR (100 MHz,  $\text{CDCl}_3$ )  $\delta$  (ppm) 153.3, 152.4, 139.9, 130.3, 126.9, 122.5, 89.2, 37.1, 36.9; LRMS (ESI) calcd for  $\text{C}_9\text{H}_9\text{BrINO}_2$   $[\text{M}+\text{H}]^+$ : 370.99, found 371.86.

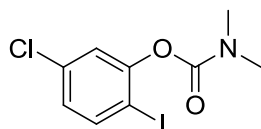

### 5-chloro-2-iodophenyl dimethylcarbamate (12)

Following the general procedure **II**, a mixture of 3-chlorophenyl dimethylcarbamate (40 mg, 0.20 mmol), I-OMe (61 mg, 0.22 mmol),  $\text{Pd}(\text{OAc})_2$  (2.3 mg, 0.01 mmol) and TfOH (2.0 equiv, 36  $\mu\text{L}$ ) in DCE (1 ml) was stirred at room temperature for 2.0 h. After completion of the reaction, the residue was purified by silical gel column chromatography (Petroleum ether: Ethyl acetate = 9:1). Finally, compound **12** (48 mg) was isolated in 74% yield as a colorless oil.  $^1\text{H}$  NMR (400 MHz,  $\text{CDCl}_3$ )  $\delta$  (ppm) 7.70(d,  $J = 8.48$  Hz, 1H), 7.23 (d,  $J = 2.20$  Hz, 1H), 6.94 (dd,  $J_1 = 8.48$  Hz,  $J_2 = 2.16$  Hz, 1H), 3.17 (s, 3H), 3.03 (s, 3H);  $^{13}\text{C}$  NMR (100 MHz,  $\text{CDCl}_3$ )  $\delta$  (ppm) 153.3, 152.4, 139.6, 135.0, 127.4, 124.0, 88.3, 37.0, 36.9; LRMS (ESI) calcd for  $\text{C}_9\text{H}_9\text{ClINO}_2$   $[\text{M}+\text{H}]^+$ : 326.54, found 325.71.

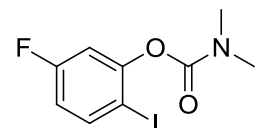

### 5-fluoro-2-iodophenyl dimethylcarbamate (13)

Following the general procedure **II**, a mixture of 3-fluorophenyl dimethylcarbamate (58 mg, 0.20 mmol), I-OMe (61 mg, 0.22 mmol),  $\text{Pd}(\text{OAc})_2$  (2.3 mg, 0.01 mmol) and TfOH (1.0 equiv, 18  $\mu\text{L}$ ) in TFEA:DCE=0.4:0.6 (1 ml) was stirred at room temperature for 11.5 h. After completion of the reaction, the residue was purified by silical gel column chromatography (Petroleum ether: Ethyl acetate = 9:1). Finally,

compound **13** (38 mg) was isolated in 62% yield as a colorless solid.  $^1\text{H}$  NMR (400 MHz,  $\text{CDCl}_3$ )  $\delta$  (ppm) 7.72 (dd,  $J = 8.76, 6.20$  Hz, 1H), 7.01 (dd,  $J_1 = 9.36$  Hz,  $J_2 = 2.80$  Hz, 1H), 6.73 (dd,  $J_1 = 8.56$  Hz,  $J_2 = 2.80$  Hz, 1H), 3.18 (s, 3H), 3.04 (s, 3H);  $^{19}\text{F}$ -NMR (400 MHz,  $\text{CDCl}_3$ ) -111.60 (s, 1F);  $^{13}\text{C}$  NMR (100 MHz,  $\text{CDCl}_3$ )  $\delta$  (ppm) 163.2 (d,  $J_{\text{C-F}} = 247$  Hz, 1C), 153.3, 152.6 (d,  $J_{\text{C-F}} = 11$  Hz, 1C), 139.3 (d,  $J_{\text{C-F}} = 9$  Hz, 1C), 114.6 (d,  $J_{\text{C-F}} = 22$  Hz, 1C), 111.7 (d,  $J_{\text{C-F}} = 25$  Hz, 1C), 83.9 (d,  $J_{\text{C-F}} = 4$  Hz, 1C), 37.0, 36.9; LRMS (ESI) calcd for  $\text{C}_9\text{H}_9\text{FINO}_2$   $[\text{M}+\text{H}]^+$ : 310.08, found 309.45.

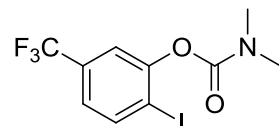

### 2-iodo-5-(trifluoromethyl)phenyl dimethylcarbamate (**14**)

Following the general procedure **II**, a mixture of 3-(trifluoromethyl)phenyl dimethylcarbamate (47 mg, 0.20 mmol), I-OMe (84 mg, 0.30 mmol),  $\text{Pd}(\text{OAc})_2$  (9.2 mg, 0.04 mmol) and TfOH (3.0 equiv, 54  $\mu\text{L}$ ) in DCE (1 ml) was stirred at rt for 4.0 h. After completion of the reaction, the residue was purified by silical gel column chromatography (Petroleum ether: Ethyl acetate = 9:1). Finally, compound **14** (42 mg) was isolated in 58% yield as a colorless oil.  $^1\text{H}$  NMR (400 MHz,  $\text{CDCl}_3$ )  $\delta$  (ppm) 7.93 (d,  $J = 8.24$  Hz, 1H), 7.46 (d,  $J = 1.24$  Hz, 1H), 7.19 (dd,  $J_1 = 8.20$  Hz,  $J_2 = 1.24$  Hz, 1H), 3.19 (s, 3H), 3.05 (s, 3H);  $^{19}\text{F}$ -NMR (400 MHz,  $\text{CDCl}_3$ ) -62.85 (s, 3F);  $^{13}\text{C}$  NMR (100 MHz,  $\text{CDCl}_3$ )  $\delta$  (ppm) 153.2, 152.2, 139.9, 132.1 (q,  $J_{\text{C-F}} = 33$  Hz, 1C), 123.6 (q,  $J_{\text{C-F}} = 4$  Hz, 1C), 123.5 (q,  $J_{\text{C-F}} = 271$  Hz, 1C), 120.5 (q,  $J_{\text{C-F}} = 4$  Hz, 1C), 95.5, 37.1, 36.9; LRMS (ESI) calcd for  $\text{C}_{10}\text{H}_9\text{F}_3\text{INO}_2$   $[\text{M}+\text{H}]^+$ : 360.09, found 359.52.

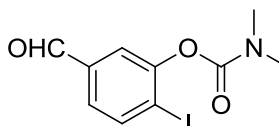

### 5-formyl-2-iodophenyl dimethylcarbamate (**15**)

Following the general procedure **II**, a mixture of 3-formylphenyl dimethylcarbamate (39 mg, 0.20 mmol), I-OTs (92 mg, 0.22 mmol),  $\text{Pd}(\text{OAc})_2$  (2.3 mg, 0.01 mmol) and TfOH (3.0 equiv, 54  $\mu\text{L}$ ) in TFEA (1 ml) was stirred at room temperature for 12.5h. After completion of the reaction, the residue was purified by silical gel column chromatography (Petroleum ether: Ethyl acetate = 9:1). Finally, compound **15** (19 mg) was isolated in 30% yield as a colorless oil.  $^1\text{H}$  NMR (400 MHz,  $\text{CDCl}_3$ )  $\delta$  (ppm) 9.94 (s, 1H), 8.00 (d,  $J = 8.08$  Hz, 1H), 7.67 (d,  $J = 1.72$  Hz, 1H), 7.44 (dd,  $J_1 = 8.08$  Hz,  $J_2 = 1.72$  Hz, 1H), 3.20 (s, 3H), 3.06 (s, 3H);  $^{13}\text{C}$  NMR (100 MHz,  $\text{CDCl}_3$ )  $\delta$  (ppm) 190.7, 153.4, 152.6, 140.2, 137.8, 127.1, 124.0, 99.6, 37.1, 36.9; LRMS (ESI) calcd for  $\text{C}_{10}\text{H}_9\text{INO}_3$   $[\text{M}+\text{H}]^+$ : 320.10, found 320.28.

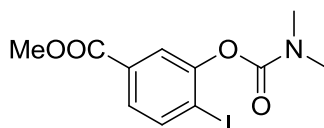

### Methyl 3-((dimethylcarbamoyl)oxy)-4-iodobenzoate (**16**)

Following the general procedure **II**, a mixture of methyl 3-((dimethylcarbamoyl)-

oxy)benzoate (45 mg, 0.20 mmol), I-OMe (84 mg, 0.30 mmol), Pd(OAc)<sub>2</sub> (4.6 mg, 0.02 mmol) and TfOH (2.5 equiv, 33 uL) in DCE (1 ml) was stirred at room temperature for 6.0 h. After completion of the reaction, the residue was purified by silical gel column chromatography (Petroleum ether: Ethyl acetate = 9:1). Finally, compound **16** (50 mg) was isolated in 71% yield as a colorless oil. <sup>1</sup>H NMR (400 MHz, CDCl<sub>3</sub>) δ (ppm) 7.89 (d, *J* = 8.24Hz, 1H), 7.81 (d, *J* = 1.76Hz, 1H), 7.59 (dd, *J*<sub>1</sub> = 8.20 Hz, *J*<sub>2</sub> = 1.76 Hz, 1H), 3.89 (s, 1H), 3.19 (s, 3H), 3.05 (s, 3H); <sup>13</sup>C NMR (100 MHz, CDCl<sub>3</sub>) δ (ppm) 166.0, 153.5, 152.0, 139.4, 131.8, 127.8, 124.2, 97.5, 52.5, 37.1, 36.9; LRMS (ESI) calcd for C<sub>11</sub>H<sub>12</sub>INO<sub>4</sub> [M+H]<sup>+</sup>: 350.13, found 350.21.

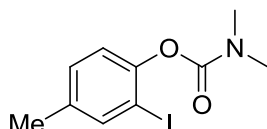

#### 2-iodo-4-methylphenyl dimethylcarbamate (**17**)

Following the general procedure **II**, a mixture of p-tolyl dimethylcarbamate (36 mg, 0.20 mmol), I-OMe (61.0 mg, 0.22 mmol), Pd(OAc)<sub>2</sub> (2.3 mg, 0.01 mmol) and TfOH (1.0 equiv, 18 uL) in TFEA (1 ml) was stirred at room temperature for 4.0 h. After completion of the reaction, the residue was purified by silical gel column chromatography (Petroleum ether: Ethyl acetate = 9:1). Finally, compound **17** (39 mg) was isolated in 64% yield as a colorless oil. <sup>1</sup>H NMR (400 MHz, CDCl<sub>3</sub>) δ (ppm) 7.61 (s, 1H), 7.13 (d, *J* = 8.24 Hz, 1H), 7.05(d, *J* = 8.20 Hz, 1H), 3.17 (s, 3H), 3.03 (s, 3H), 2.30 (s, 3H); <sup>13</sup>C NMR (100 MHz, CDCl<sub>3</sub>) δ (ppm) 154.1, 149.6, 139.4, 137.1, 130.1, 122.9, 90.6, 37.0, 36.8, 20.5; LRMS (ESI) calcd for C<sub>10</sub>H<sub>12</sub>INO<sub>2</sub> [M+H]<sup>+</sup>: 306.12, found 305.98.

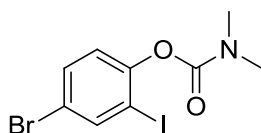

#### 4-bromo-2-iodophenyl dimethylcarbamate (**18**)

Following the general procedure **II**, a mixture of 4-bromophenyl dimethylcarbamate (49 mg, 0.20 mmol), I-OMe (61 mg, 0.22 mmol), Pd(OAc)<sub>2</sub> (2.3 mg, 0.01 mmol) and TfOH (1.0 equiv, 18 uL) in TFEA (1 ml) was stirred at room temperature for 8.0 h. After completion of the reaction, the residue was purified by silical gel column chromatography (Petroleum ether: Ethyl acetate = 9:1). Finally, compound **18** (41 mg) was isolated in 55% yield as a colorless oil. <sup>1</sup>H NMR (400 MHz, CDCl<sub>3</sub>) δ (ppm) 7.92 (d, *J* = 1.24 Hz, 1H), 7.45 (d, *J* = 8.64 Hz, 1H), 7.06 (d, *J* = 8.60 Hz, 1H), 3.17 (s, 3H), 3.02 (s, 3H); <sup>13</sup>C-NMR (100 MHz, CDCl<sub>3</sub>) δ (ppm) 153.4, 151.1, 141.0, 132.4, 124.5, 119.0, 91.7, 37.0, 36.9; LRMS (ESI) calcd for C<sub>9</sub>H<sub>9</sub>BrINO<sub>2</sub> [M+H]<sup>+</sup>: 370.99, found 371.71.

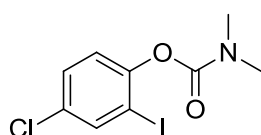

#### 4-chloro-2-iodophenyl dimethylcarbamate (**19**)



Following the general procedure **II**, a mixture of 4-chlorophenyl dimethylcarbamate (40mg, 0.20 mmol), I-OMe (61 mg, 0.22 mmol), Pd(OAc)<sub>2</sub> (2.3 mg, 0.01 mmol) and TfOH (1.5 equiv, 27 uL) in TFEA (1 ml) was stirred at room temperature for 4.0 h. After completion of the reaction, the residue was purified by silical gel column chromatography (Petroleum ether: Ethyl acetate = 9:1). Finally, compound **19** (35 mg) was isolated in 55% yield as a colorless oil. <sup>1</sup>H NMR (400 MHz, CDCl<sub>3</sub>) δ (ppm) 7.77 (s, 1H), 7.31 (d, *J* = 8.64 Hz, 1H), 7.11 (d, *J* = 8.68 Hz, 1H), 3.17 (s, 3H), 3.03 (s, 3H); <sup>13</sup>C-NMR (100 MHz, CDCl<sub>3</sub>) δ (ppm) 153.5, 150.6, 138.3, 131.4, 129.4, 124.0, 91.1, 37.0, 36.8; LRMS (ESI) calcd for C<sub>9</sub>H<sub>9</sub>ClINO<sub>2</sub> [M+H]<sup>+</sup>: 326.54, found 325.47.

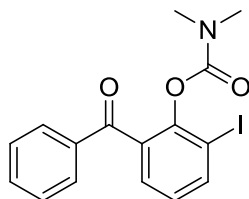

### 2-benzoyl-6-iodophenyl dimethylcarbamate **20a**

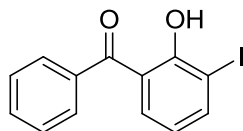

### (2-hydroxy-3-iodophenyl)(phenyl)methanone **20b**

Following the general procedure **II**, a mixture of 2-benzoylphenyl dimethylcarbamate (54 mg, 0.20 mmol), I-OMe (84 mg, 0.30 mmol), Pd(OAc)<sub>2</sub> (9.6 mg, 0.04 mmol) and TfOH (3.0 equiv, 54 uL) in DCE (1 ml) was stirred at room temperature for 4.0 h. After completion of the reaction, the residue was purified by silical gel column chromatography (Petroleum ether: Ethyl acetate = 9:1). Finally, compound **20a** (32 mg) was isolated in 41% yield and compound **20b** (15 mg) was isolated in 23% yield. **20a** <sup>1</sup>H NMR (400 MHz, CDCl<sub>3</sub>) δ (ppm) 7.98 (dd, *J*<sub>1</sub> = 7.88 Hz, *J*<sub>2</sub> = 1.04 Hz, 1H), 7.79 (d, *J* = 7.40 Hz, 2H), 7.57 (t, *J* = 7.36 Hz), 7.47-7.43 (m, 3H), 7.04 (t, *J* = 7.76 Hz), 2.88 (s, 3H), 2.82 (s, 3H); <sup>13</sup>C NMR (100 MHz, CDCl<sub>3</sub>) δ (ppm) 194.1, 152.8, 149.6, 142.0, 137.3, 133.7, 133.1, 130.6, 130.1, 128.4, 126.8, 93.2, 36.9, 36.5; LRMS (ESI) calcd for C<sub>16</sub>H<sub>14</sub>INO<sub>3</sub> [M+H]<sup>+</sup>: 396.20, found 396.28.

**20b** <sup>1</sup>H NMR (400 MHz, CDCl<sub>3</sub>) δ (ppm) 8.00 (d, *J* = 7.68 Hz, 1H), 7.67 (d, *J* = 7.52 Hz, 2H), 7.63-7.60 (m, 2H), 7.52 (t, *J* = 7.36 Hz, 2H), 6.69 (t, *J* = 7.80 Hz, 1H); <sup>13</sup>C NMR (100 MHz, CDCl<sub>3</sub>) δ (ppm) 201.3, 161.9, 145.8, 137.3, 134.0, 132.5, 129.4, 128.6, 120.5, 118.4, 86.6; LRMS (ESI) calcd for C<sub>13</sub>H<sub>9</sub>IO<sub>2</sub> [M-H]<sup>-</sup>: 323.11, found 322.89.

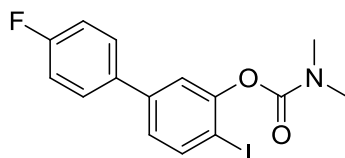

### 4'-fluoro-4-iodo-[1,1'-biphenyl]-3-yl dimethylcarbamate (**22**)

Following the general procedure **II**, a mixture of 4'-fluoro-[1,1'-biphenyl]-3-yl dimethylcarbamate (52 mg, 0.20 mmol), I-OMe (61 mg, 0.22 mmol), Pd(OAc)<sub>2</sub> (2.3 mg, 0.01 mmol) and TfOH (1.0 equiv, 18 uL) in TFEA:DCE=0.2:0.8 ml was stirred at

room temperature for 2.0 h. After completion of the reaction, the residue was purified by silical gel column chromatography (Petroleum ether: Ethyl acetate = 9:1). Finally, compound **22** (46 mg) was isolated in 60% yield as a colorless oil.  $^1\text{H}$  NMR (400 MHz,  $\text{CDCl}_3$ )  $\delta$  (ppm) 7.83 (d,  $J = 8.20$  Hz, 1H), 7.51 (dd,  $J_1 = 8.56$  Hz,  $J_2 = 5.36$  Hz, 2H), 7.37 (d,  $J = 1.96$  Hz, 1H), 7.13-7.08 (m, 3H), 3.21 (s, 3H), 3.06 (s, 3H);  $^{19}\text{F}$ -NMR (400 MHz,  $\text{CDCl}_3$ ) -114.6 (s, 1F);  $^{13}\text{C}$  NMR (100 MHz,  $\text{CDCl}_3$ )  $\delta$  (ppm) 162.9 (d,  $J_{\text{C-F}} = 245$  Hz, 1C), 153.8, 152.2, 142.0, 139.4, 135.6 (d,  $J_{\text{C-F}} = 3$  Hz, 1C), 128.8 (d,  $J_{\text{C-F}} = 8$  Hz, 2C), 125.7, 122.1, 115.9 (d,  $J_{\text{C-F}} = 22$  Hz, 2C), 89.3, 37.0, 36.9; LRMS (ESI) calcd for  $\text{C}_{15}\text{H}_{13}\text{FINO}_2$   $[\text{M}+\text{H}]^+$ : 386.18, found 386.29.

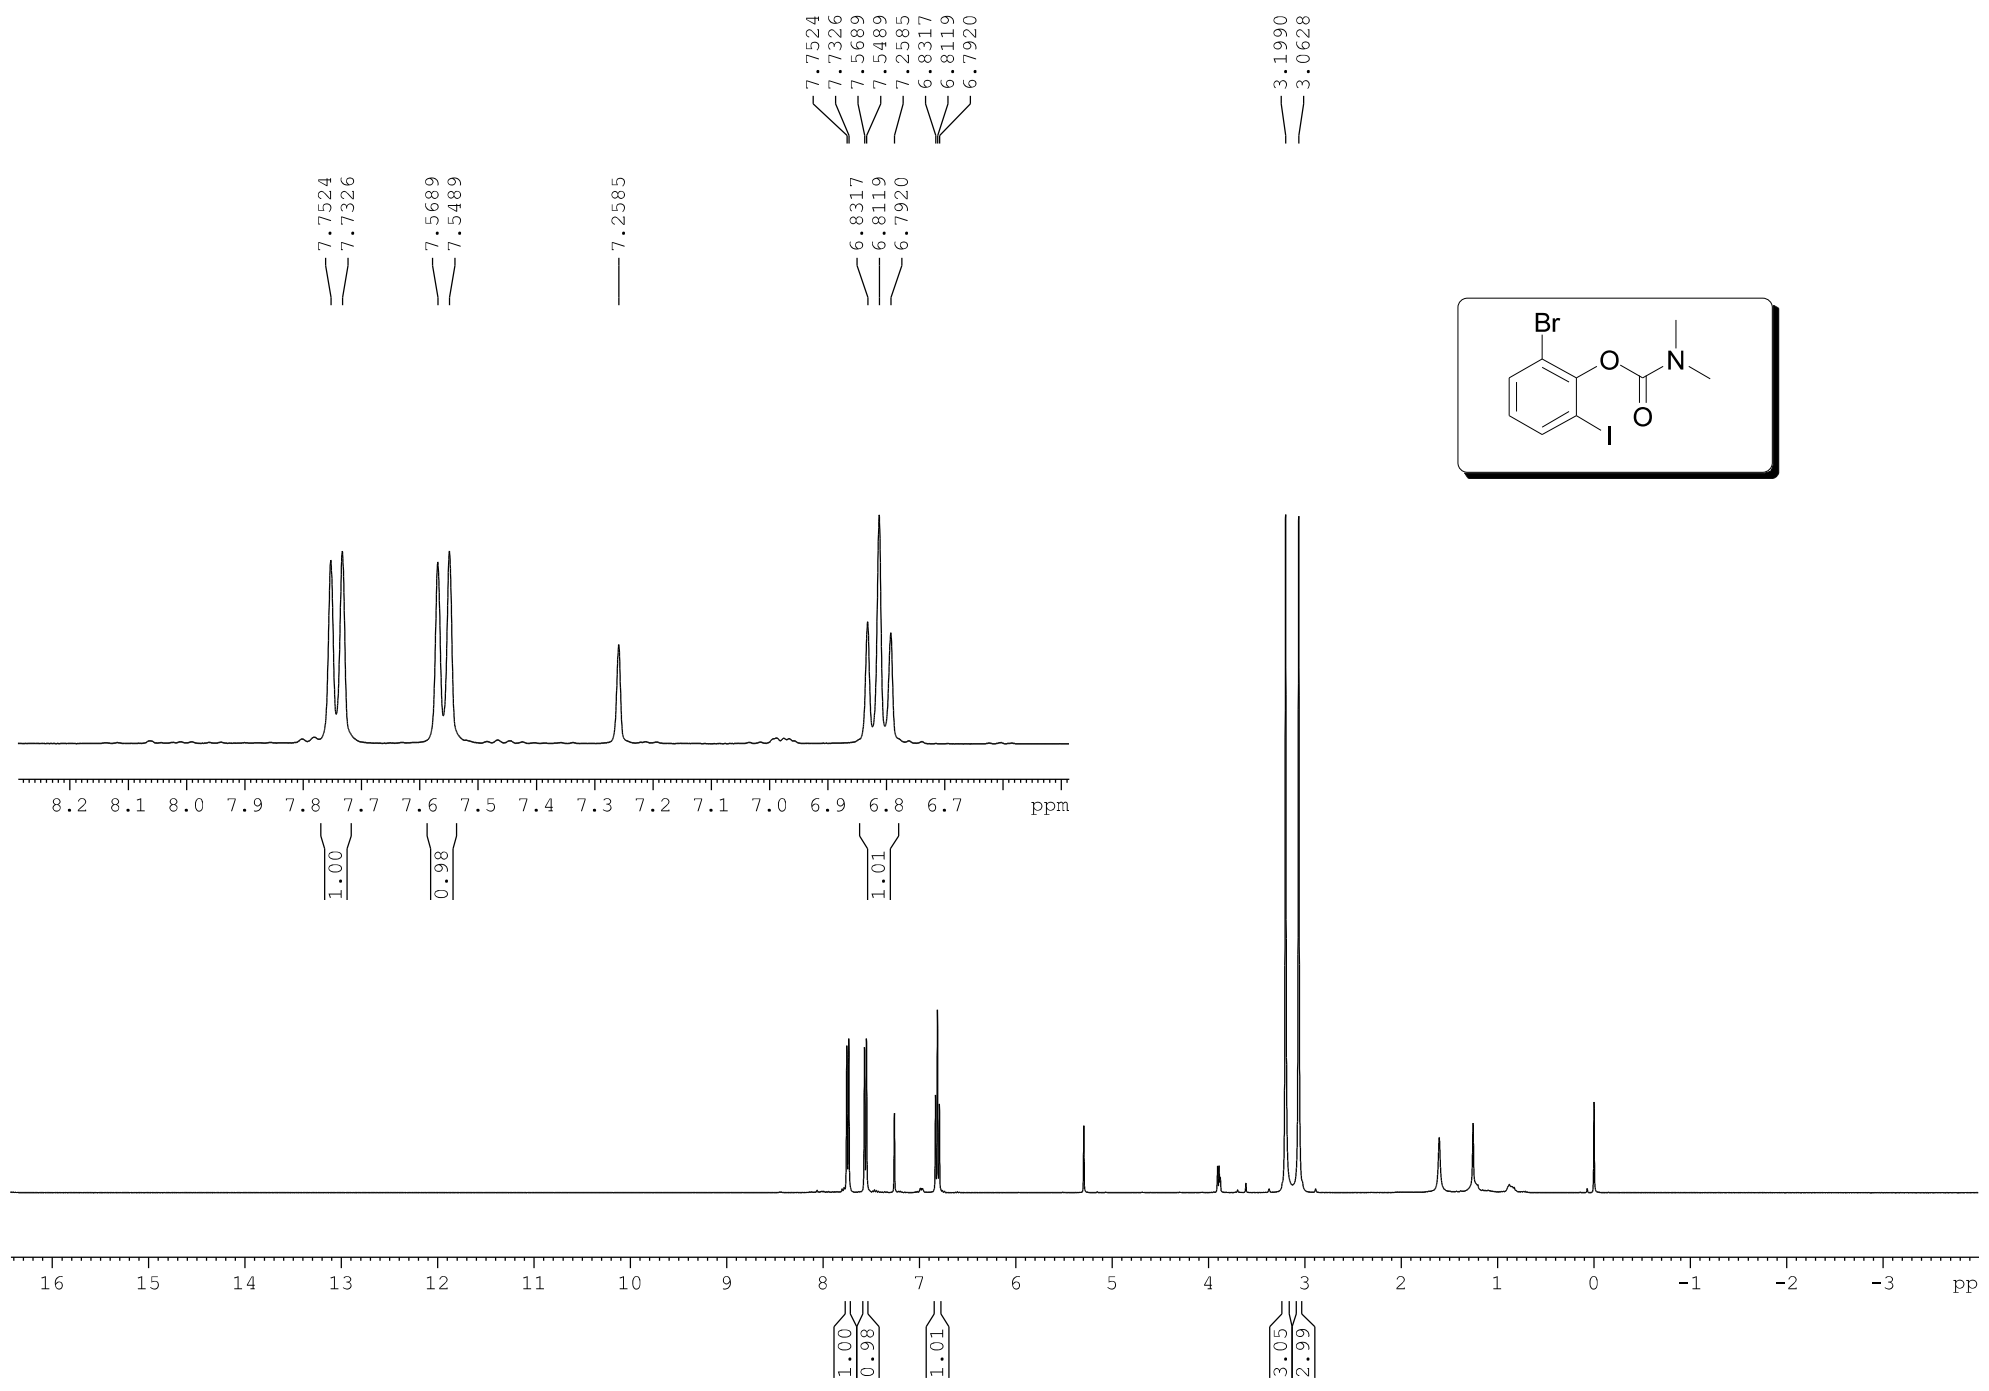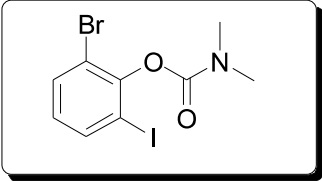

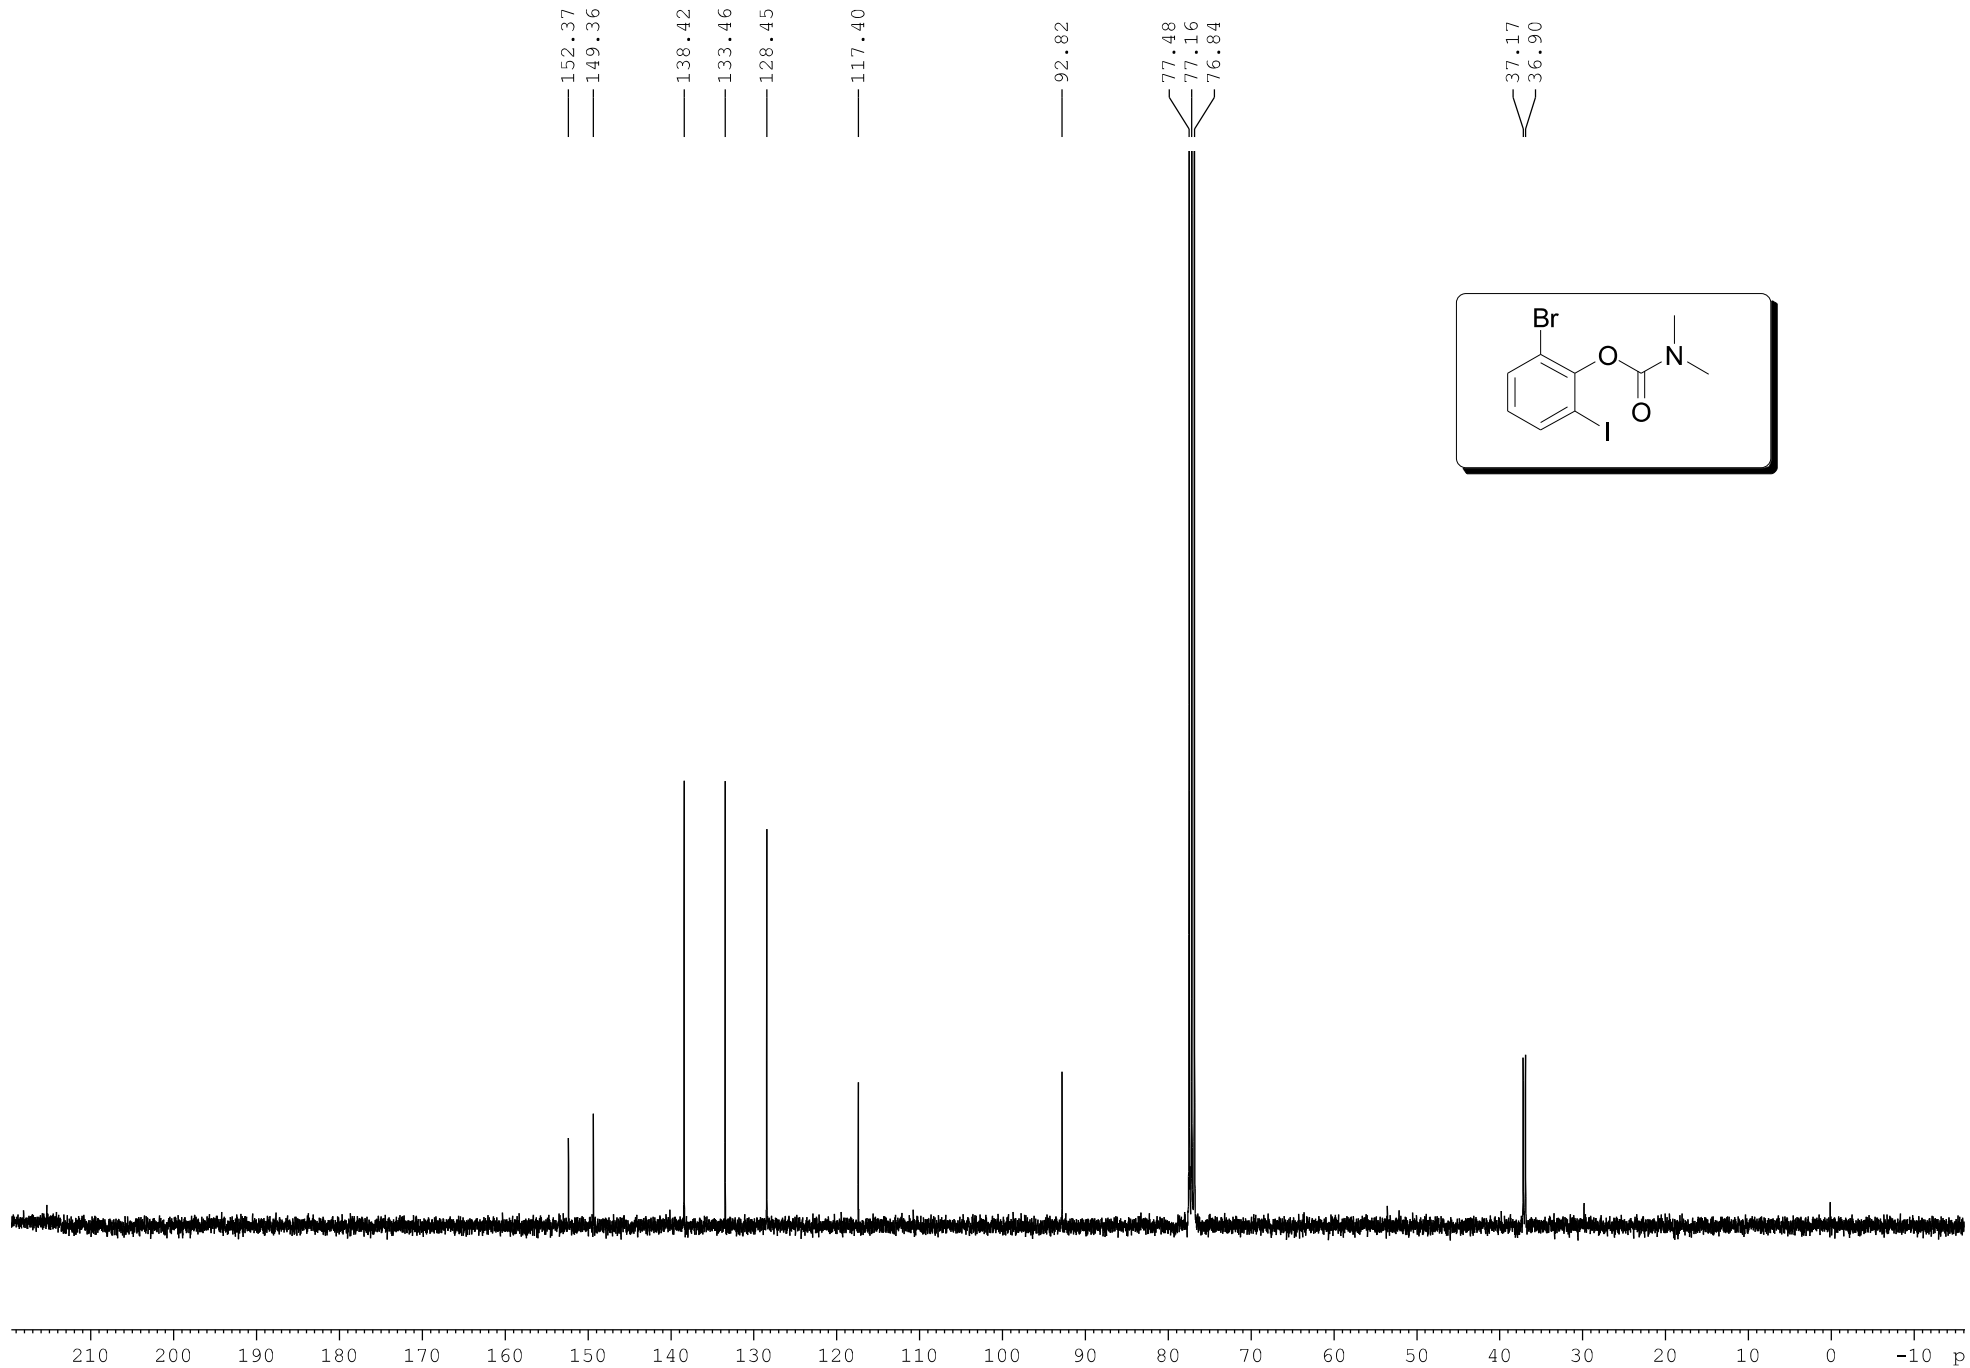

152.37  
149.36

138.42  
133.46  
128.45

117.40

92.82

77.48  
77.16  
76.84

37.17  
36.90

210 200 190 180 170 160 150 140 130 120 110 100 90 80 70 60 50 40 30 20 10 0 -10 p

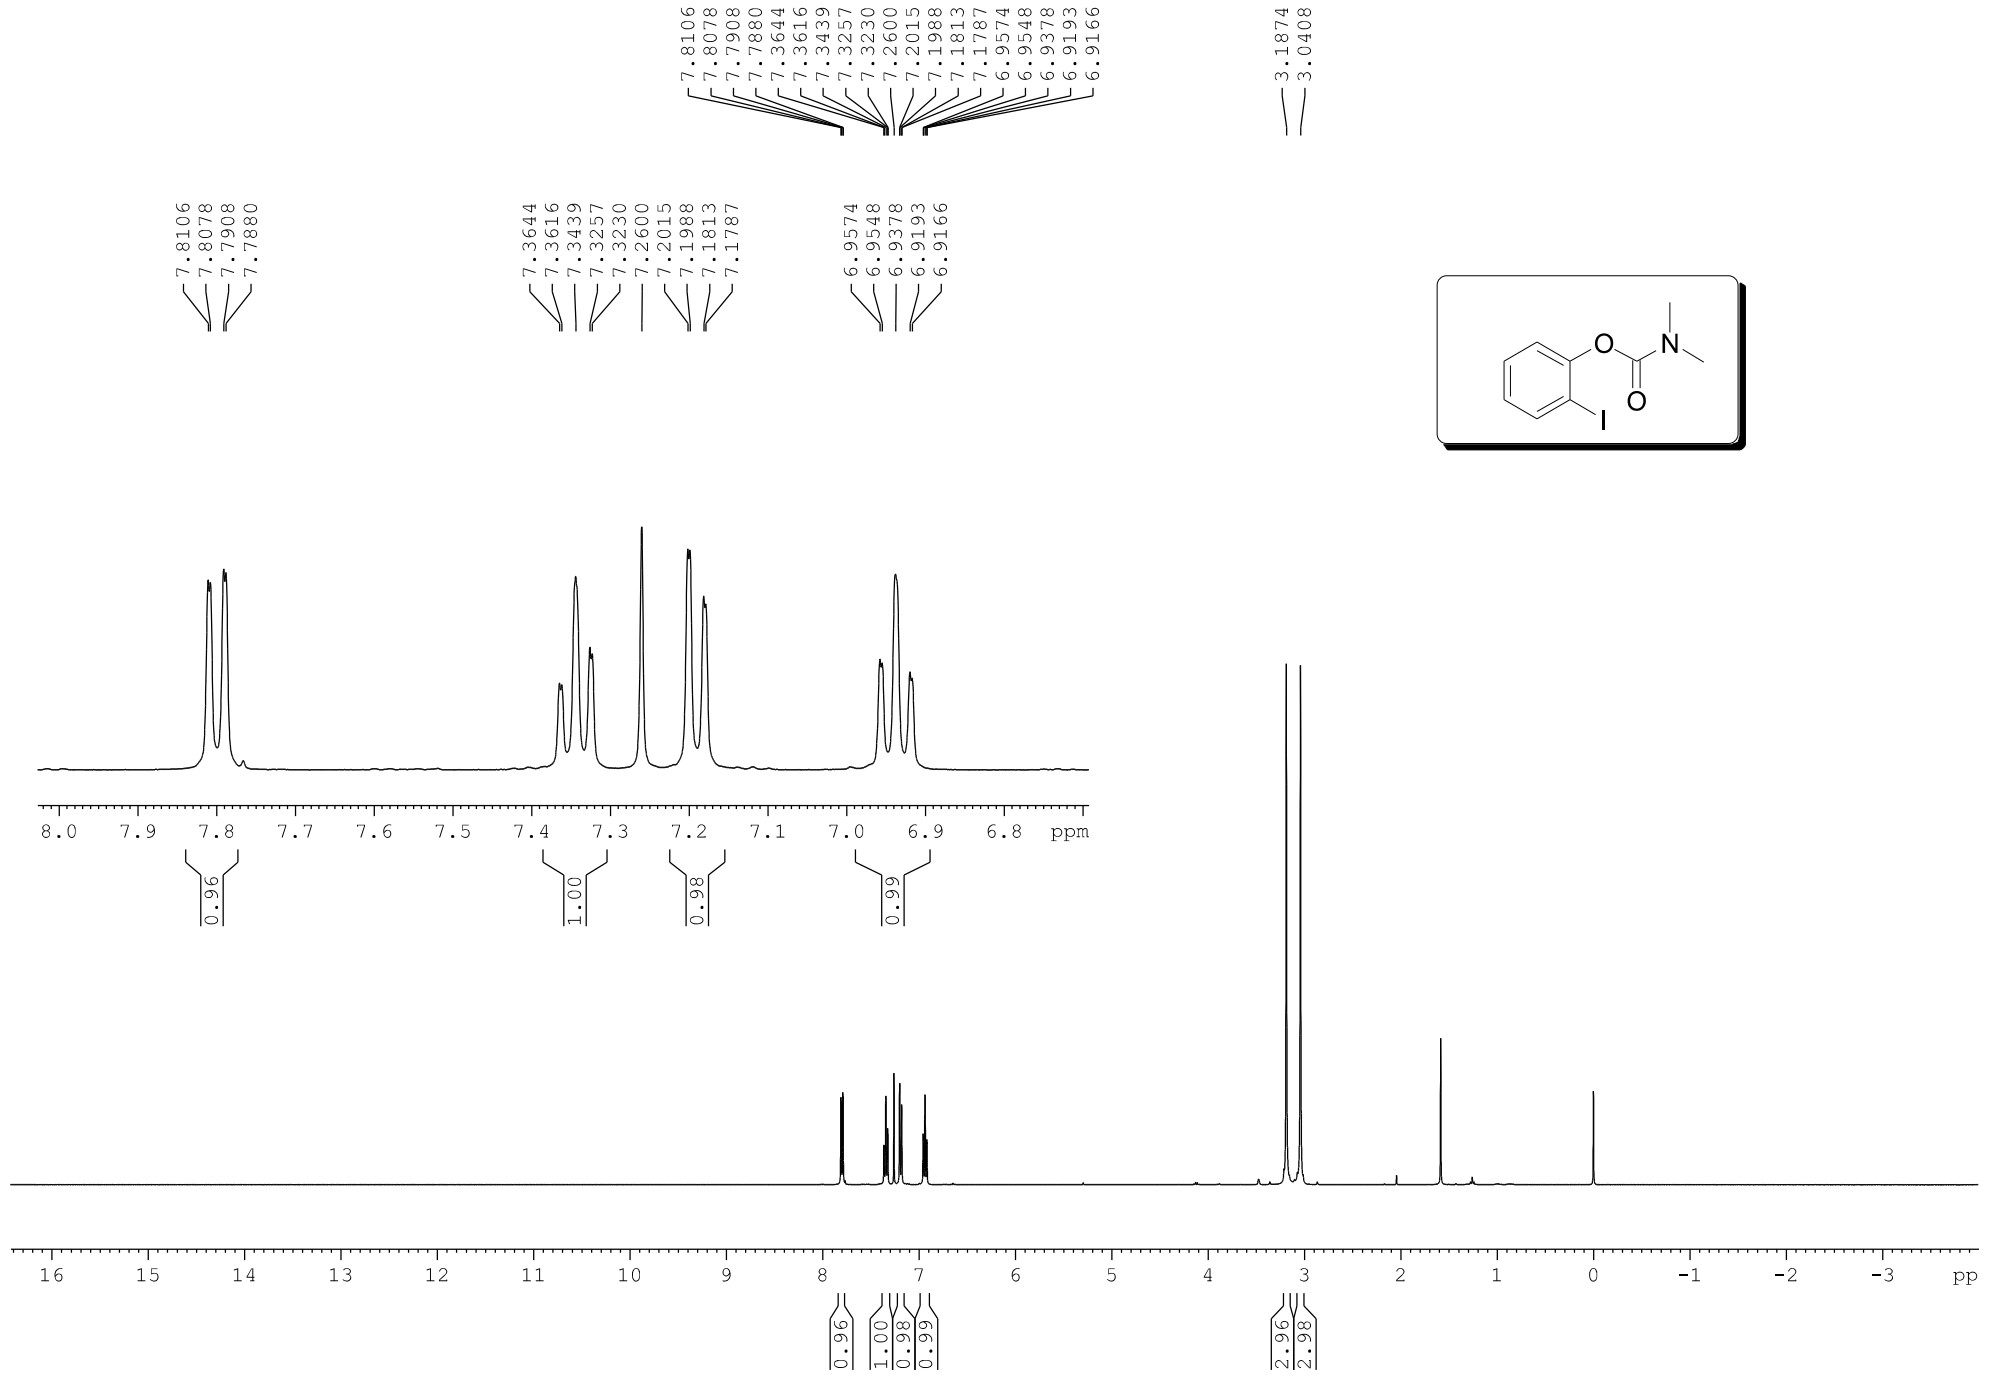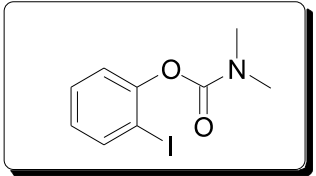

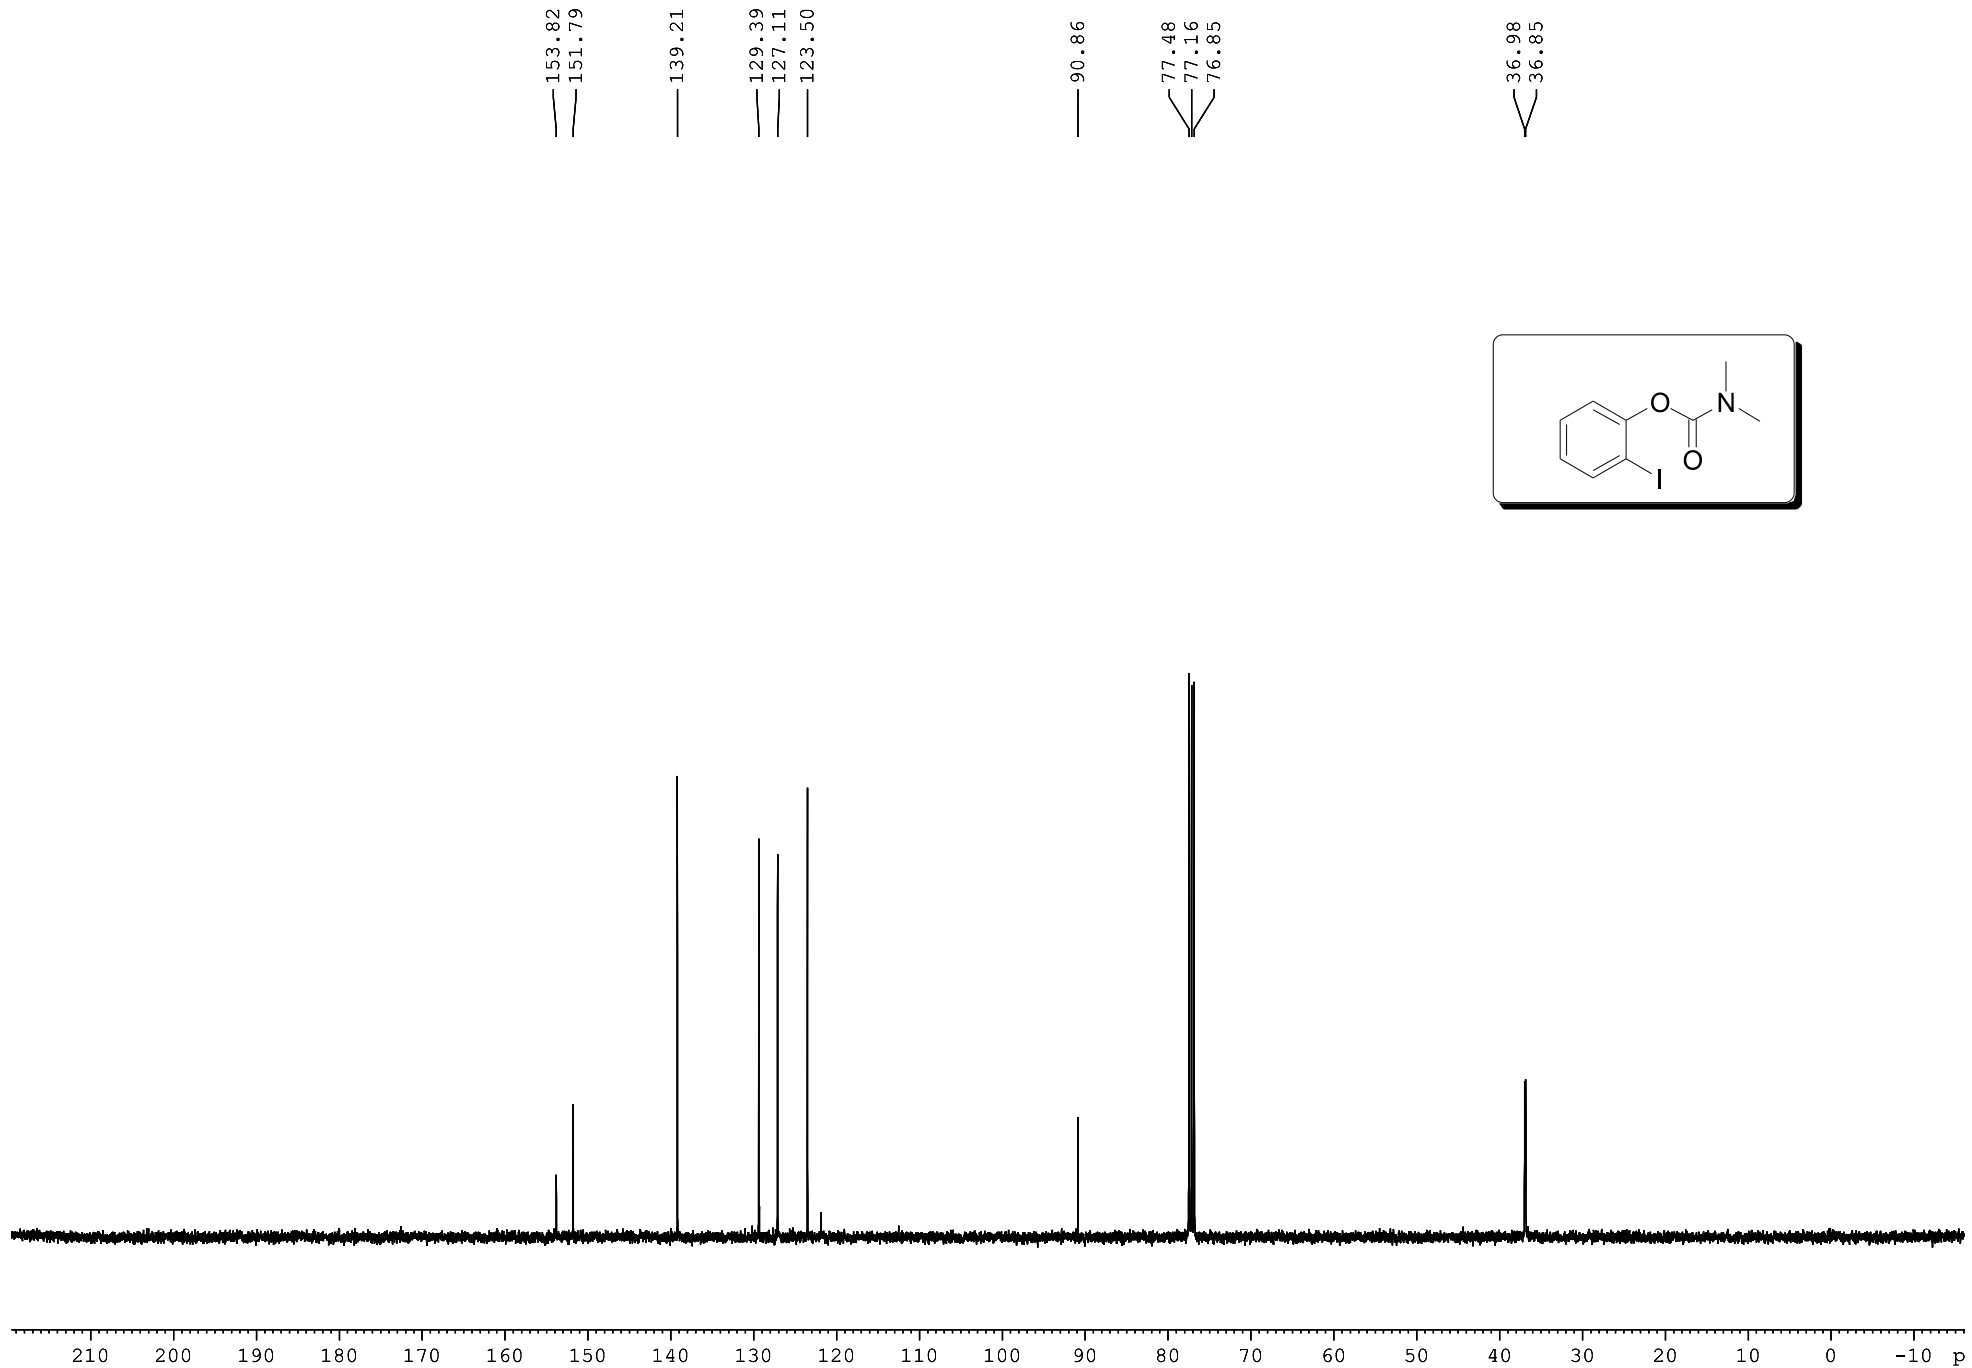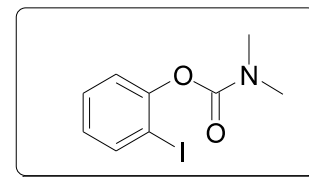

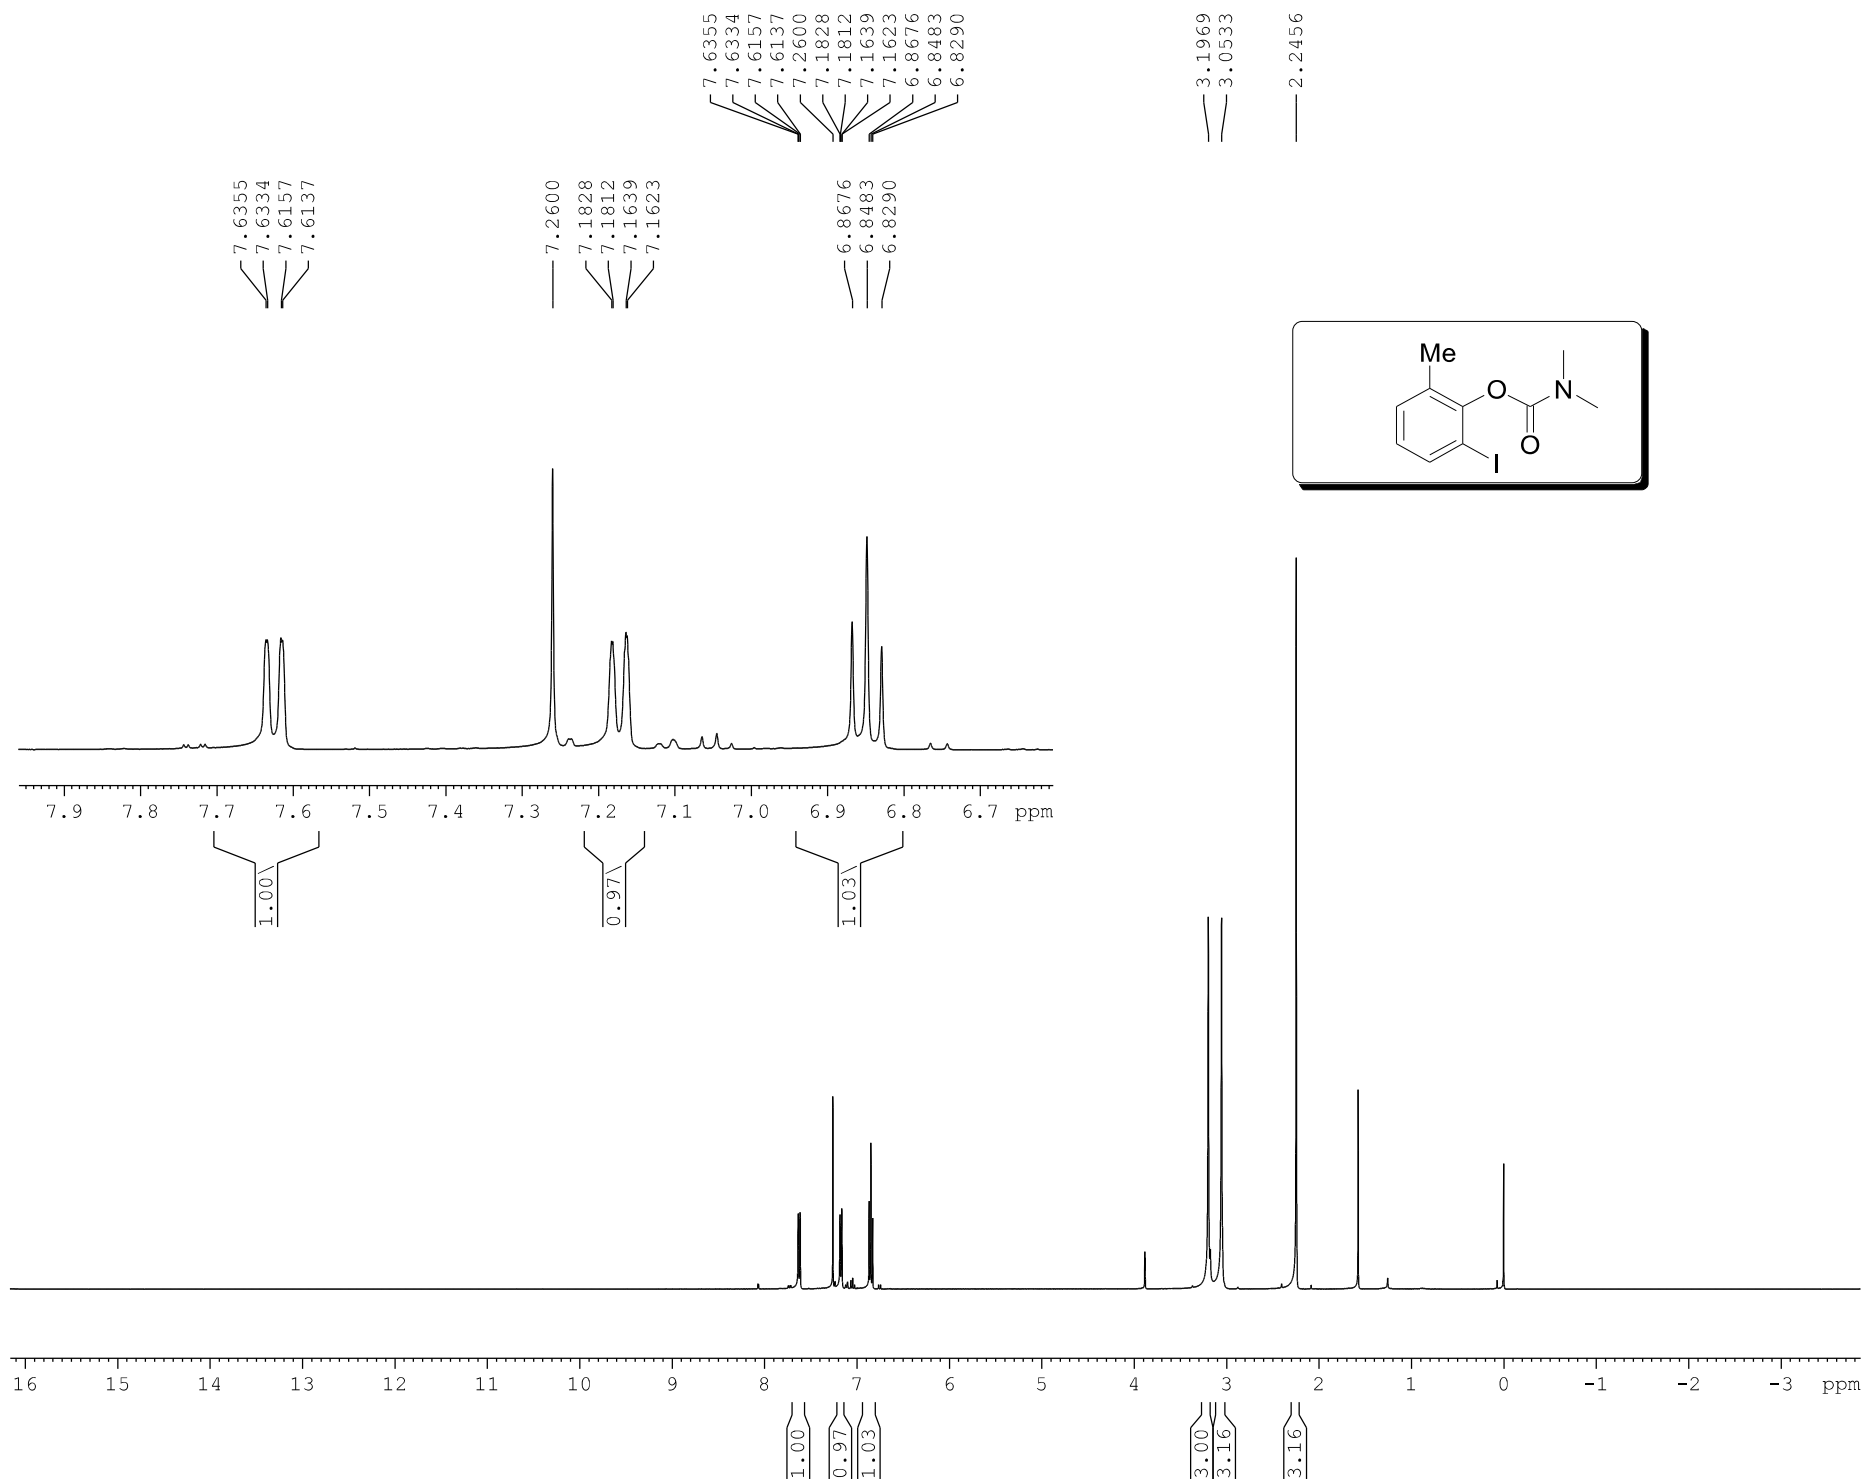

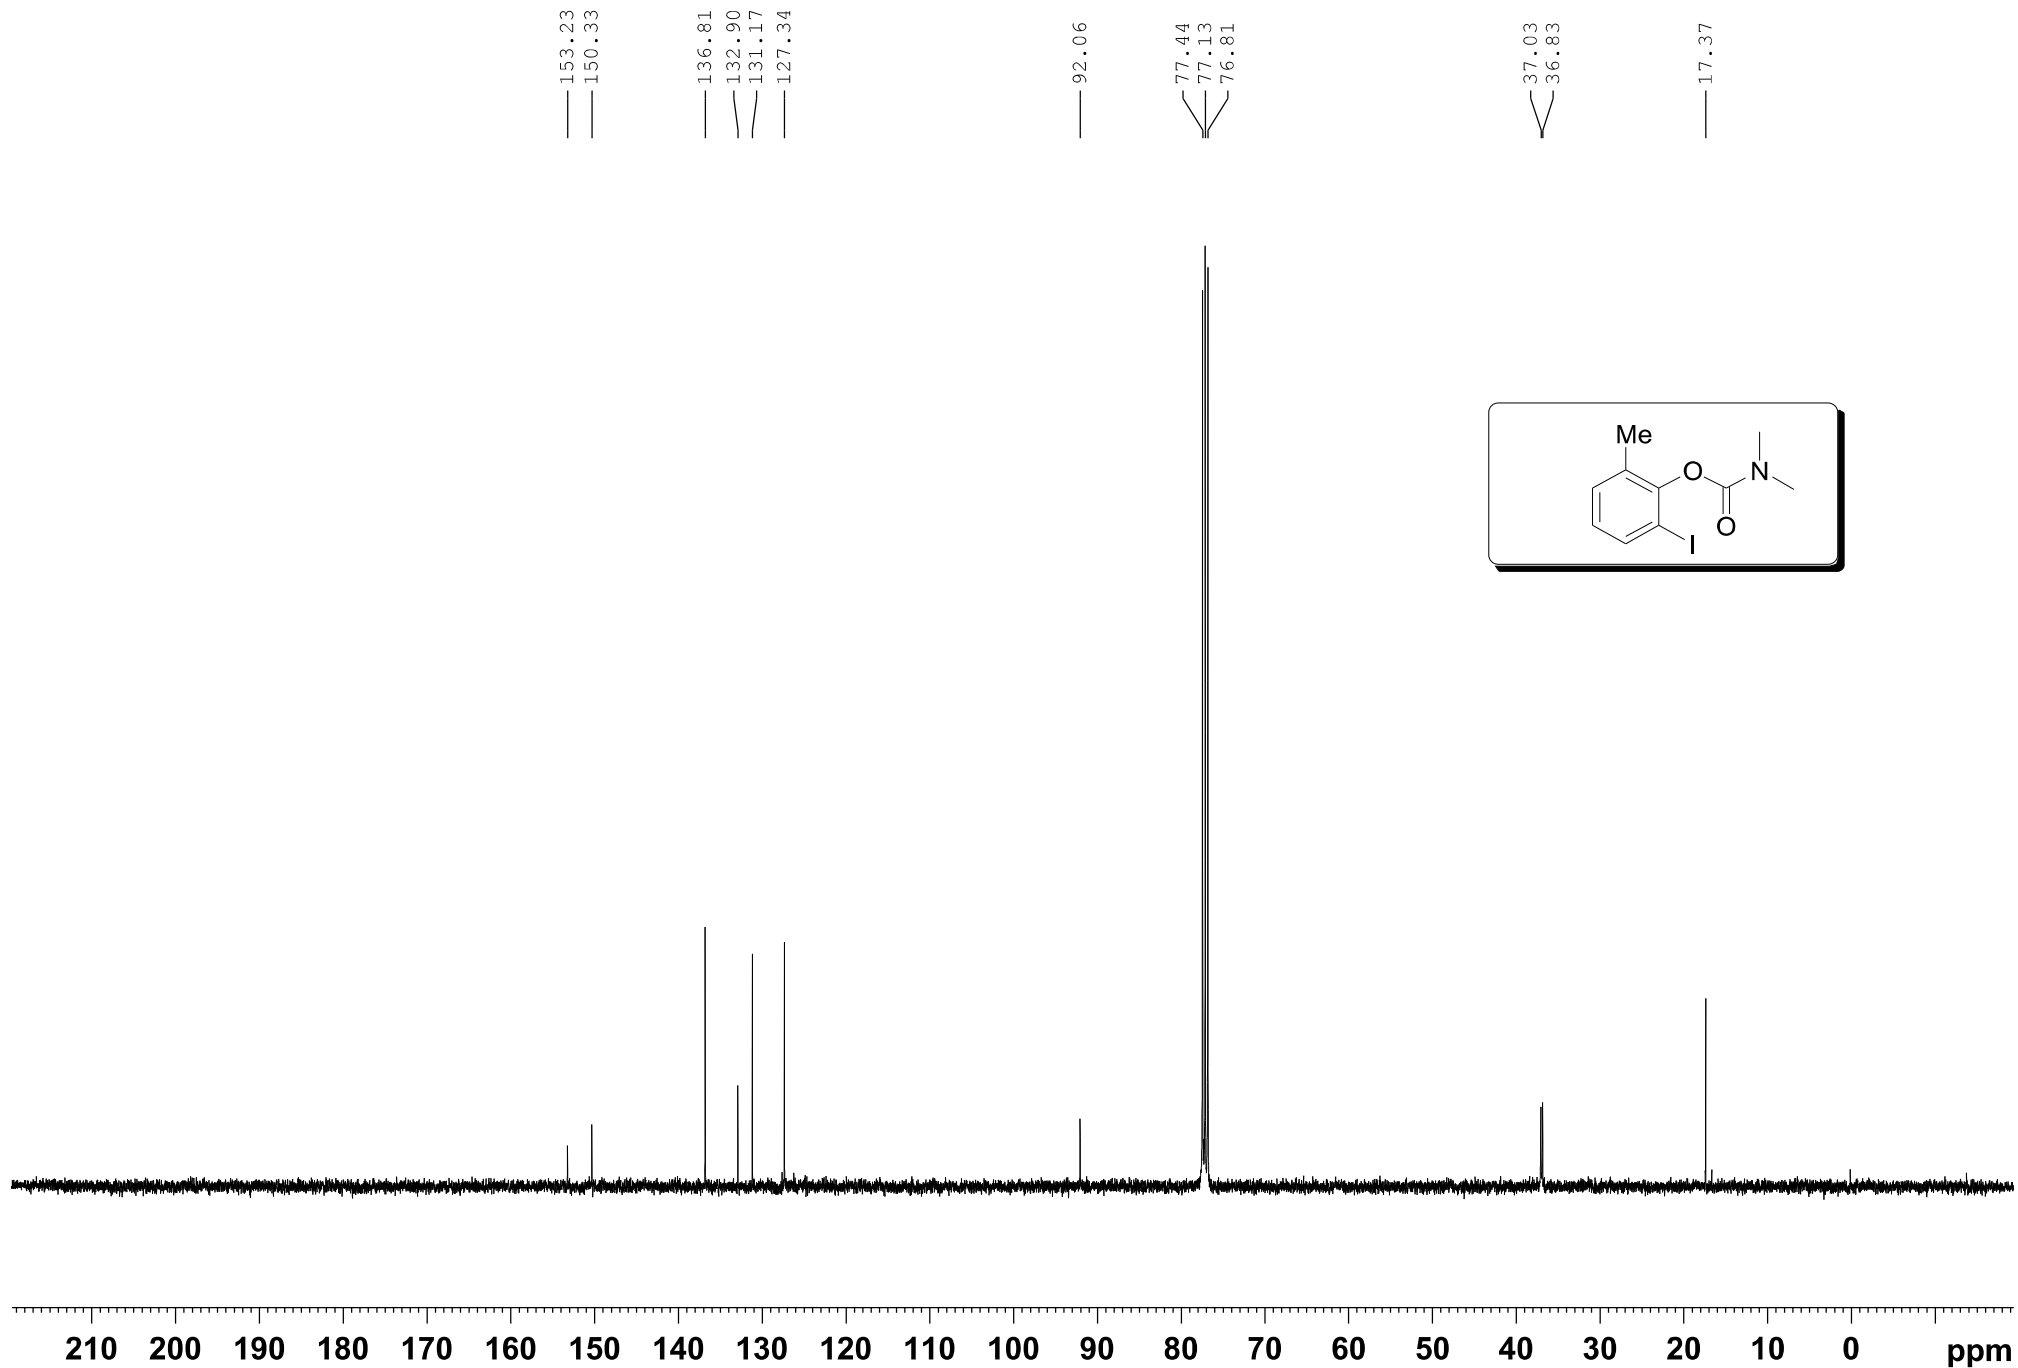



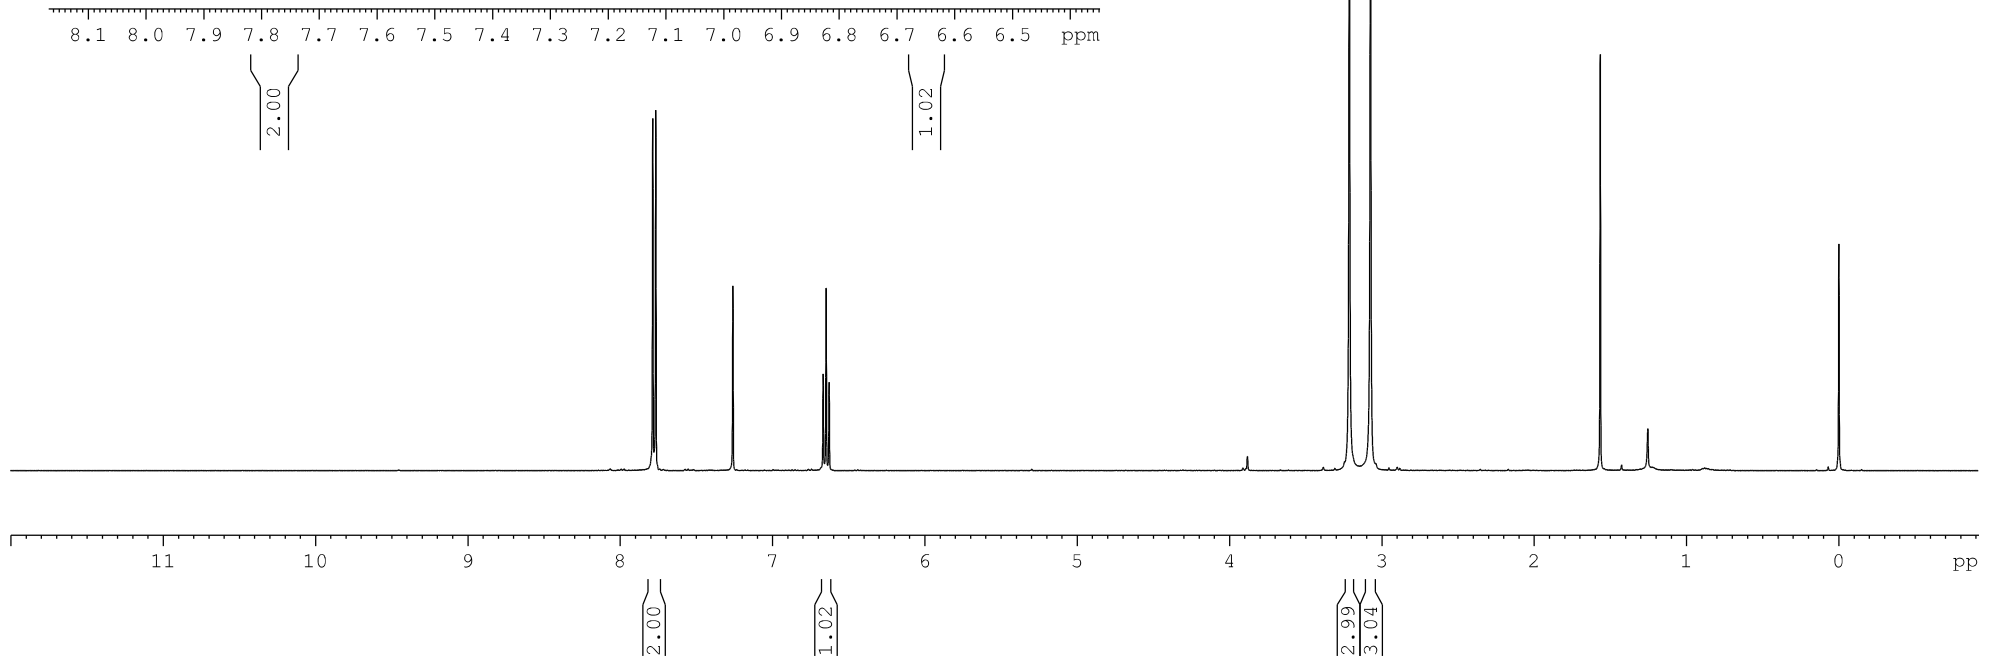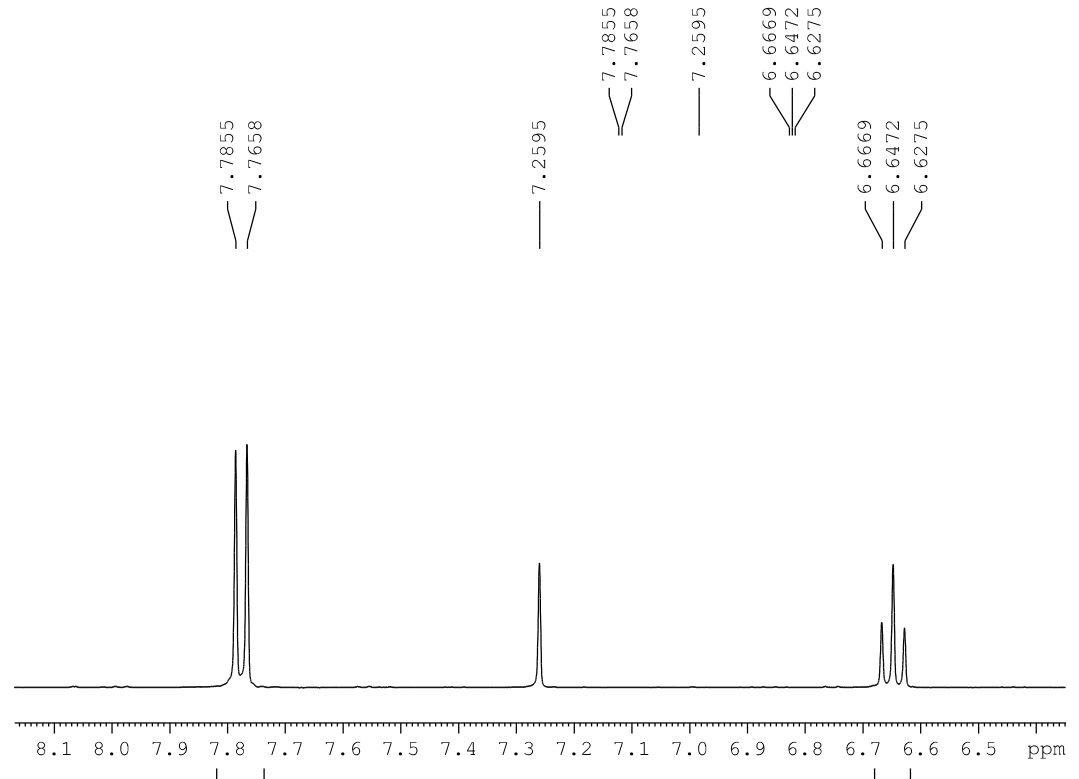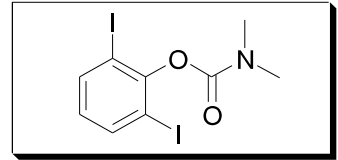

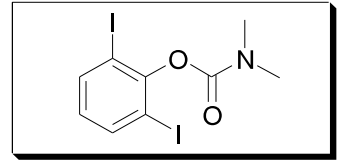

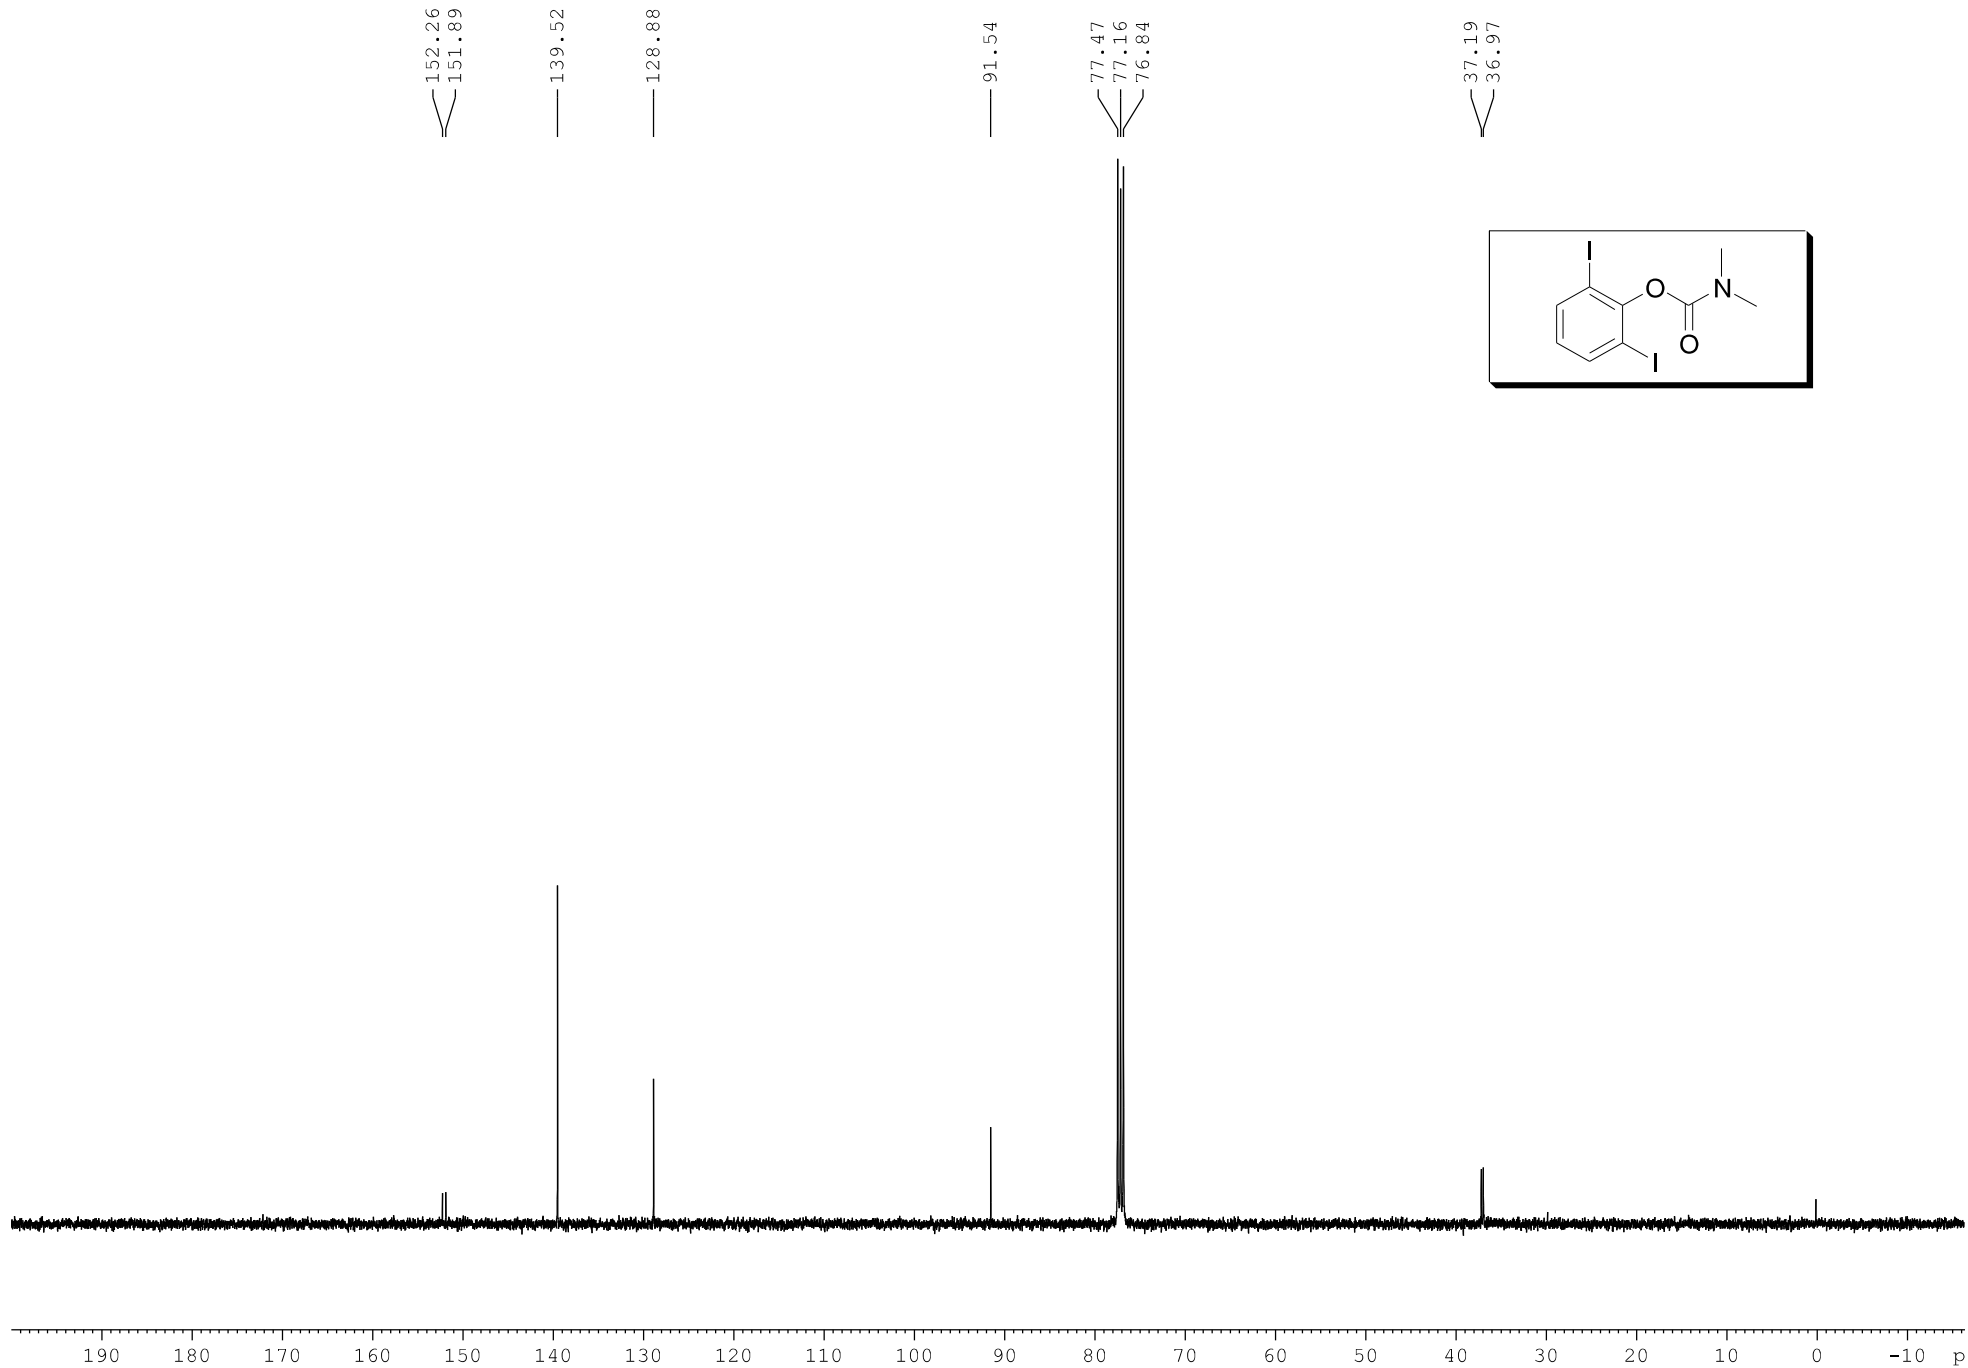

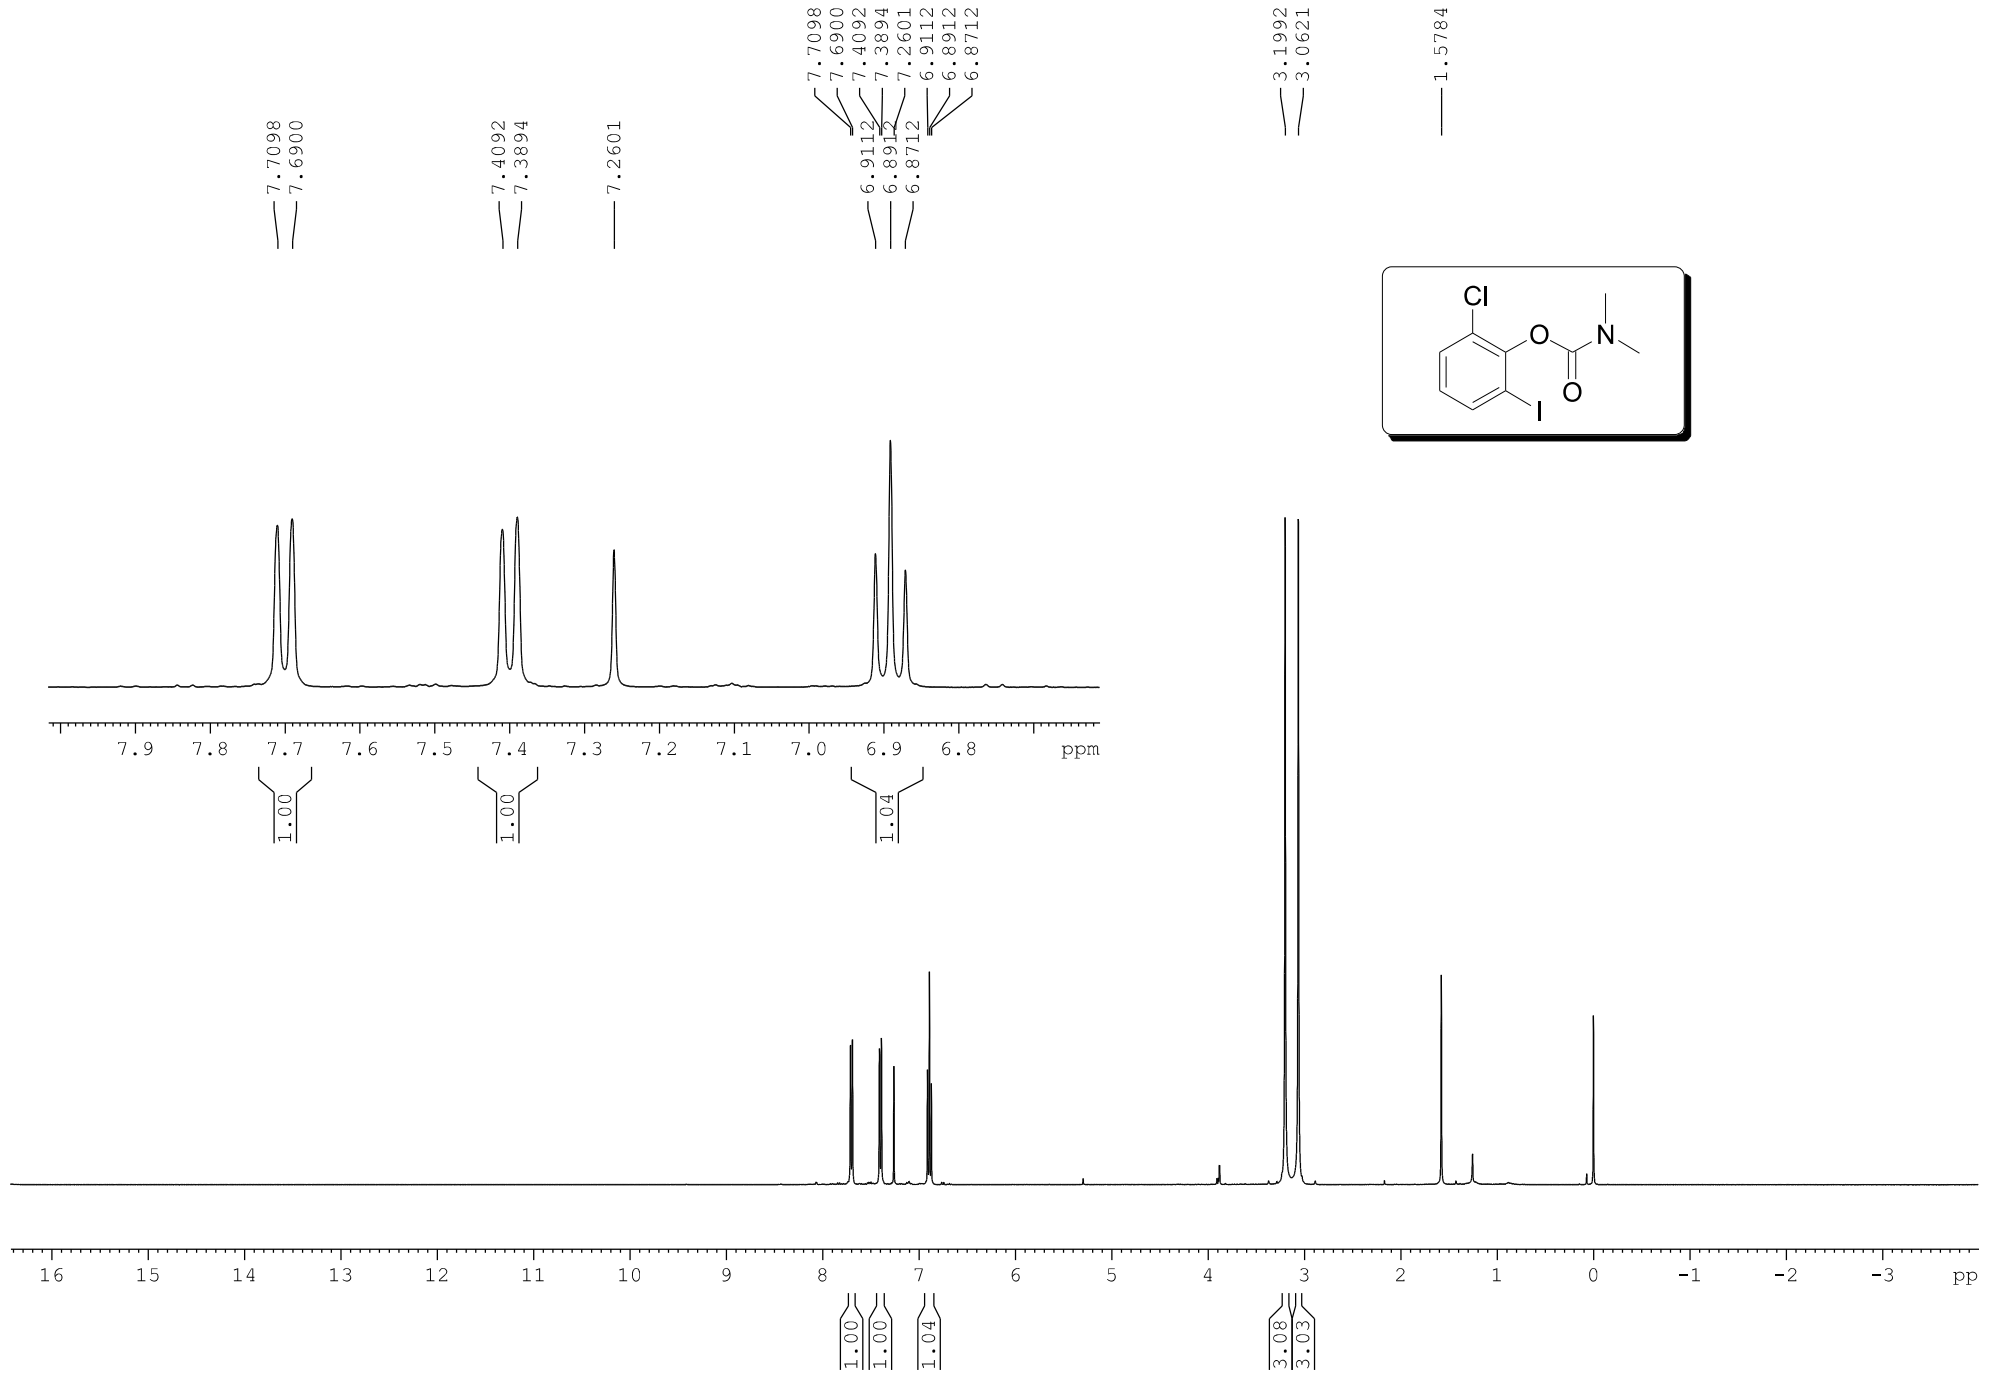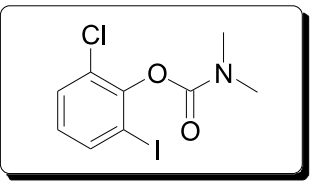

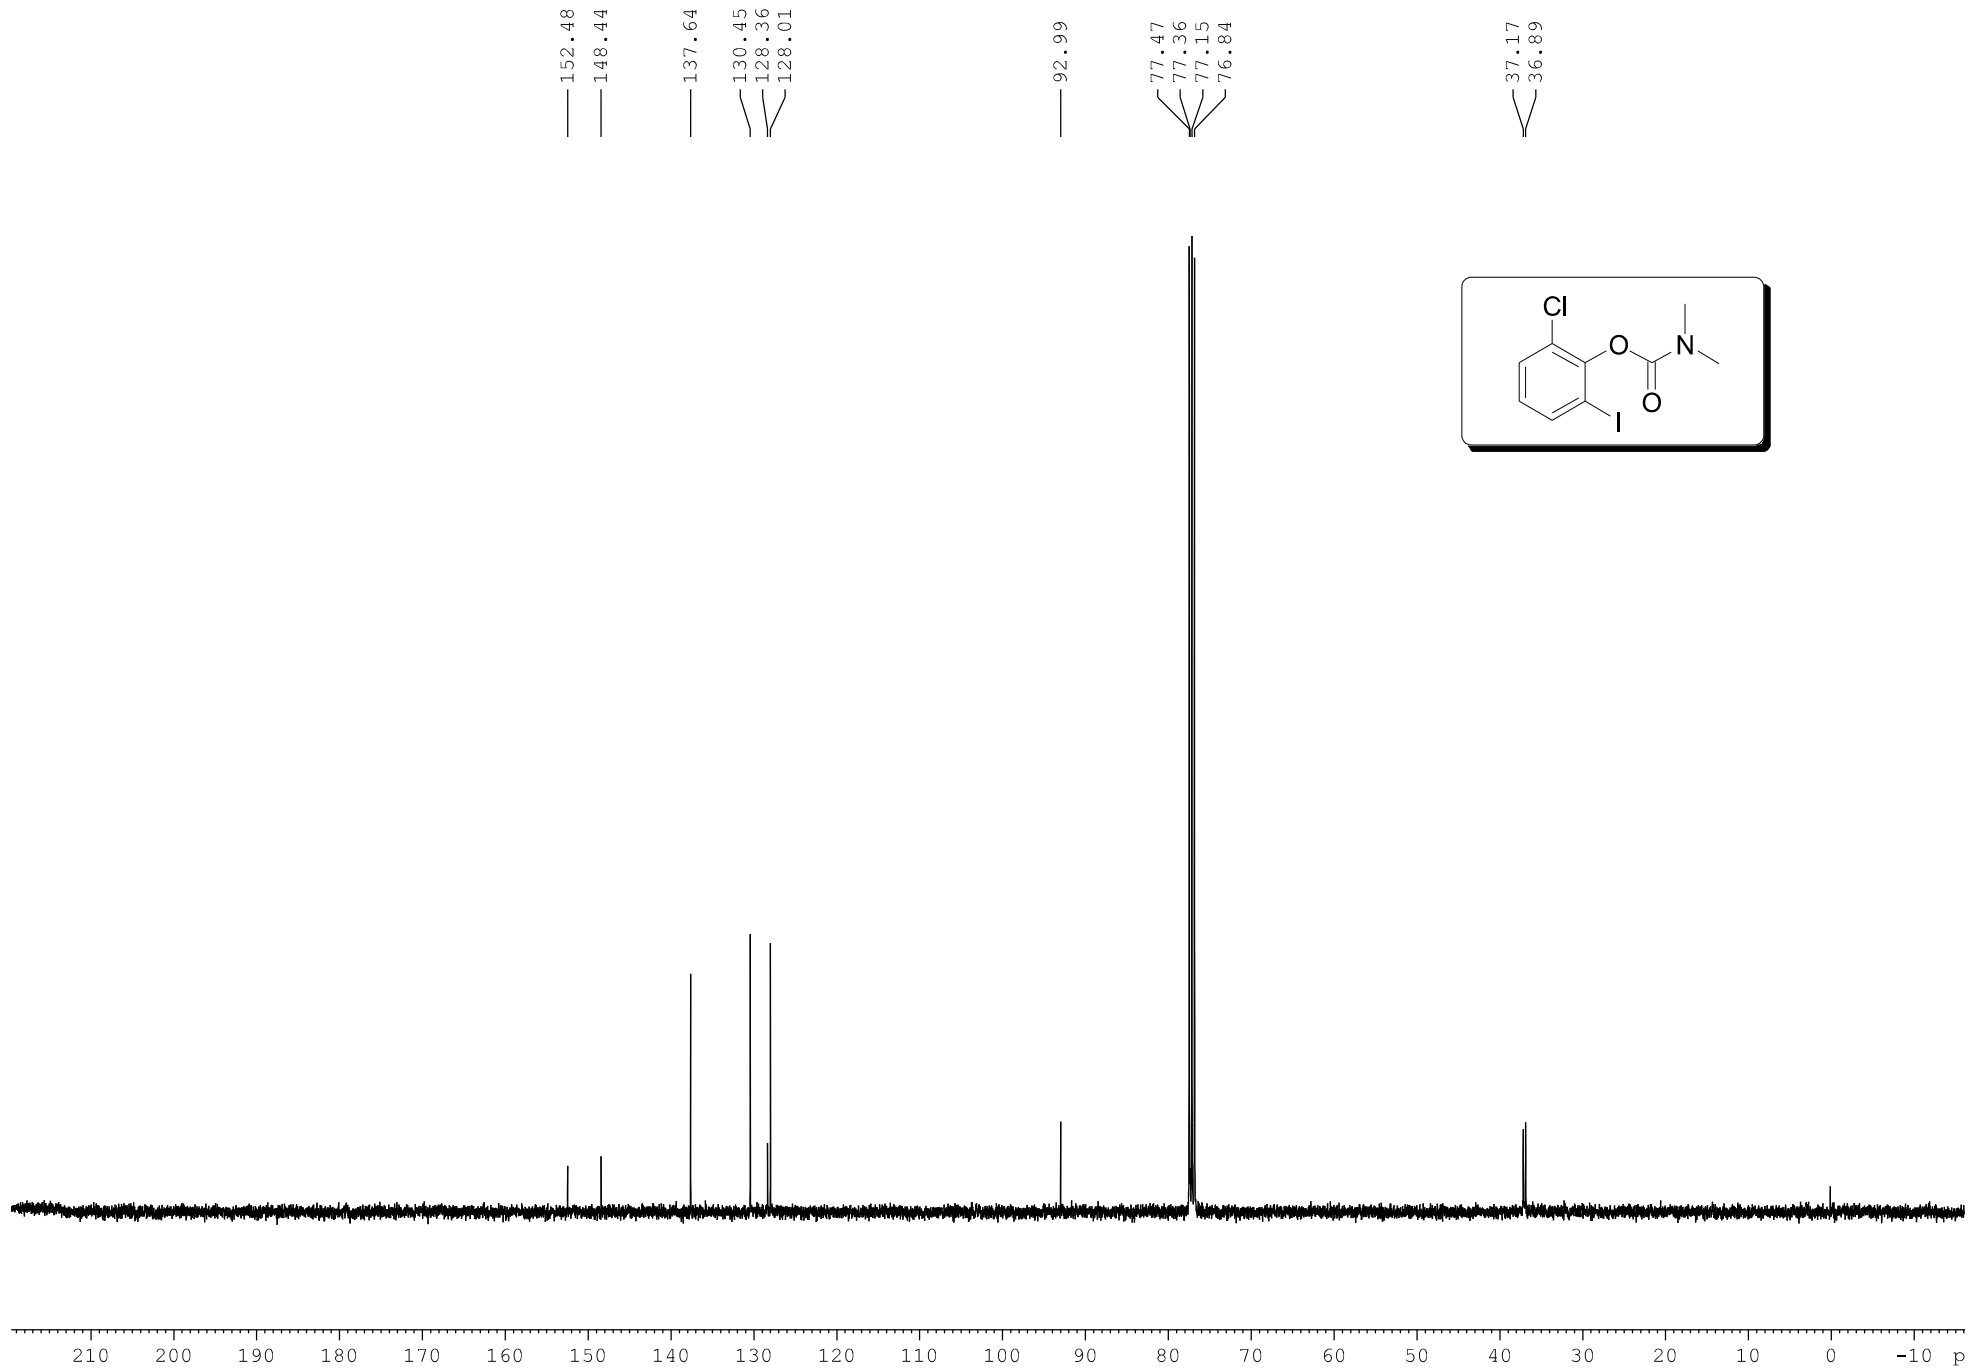

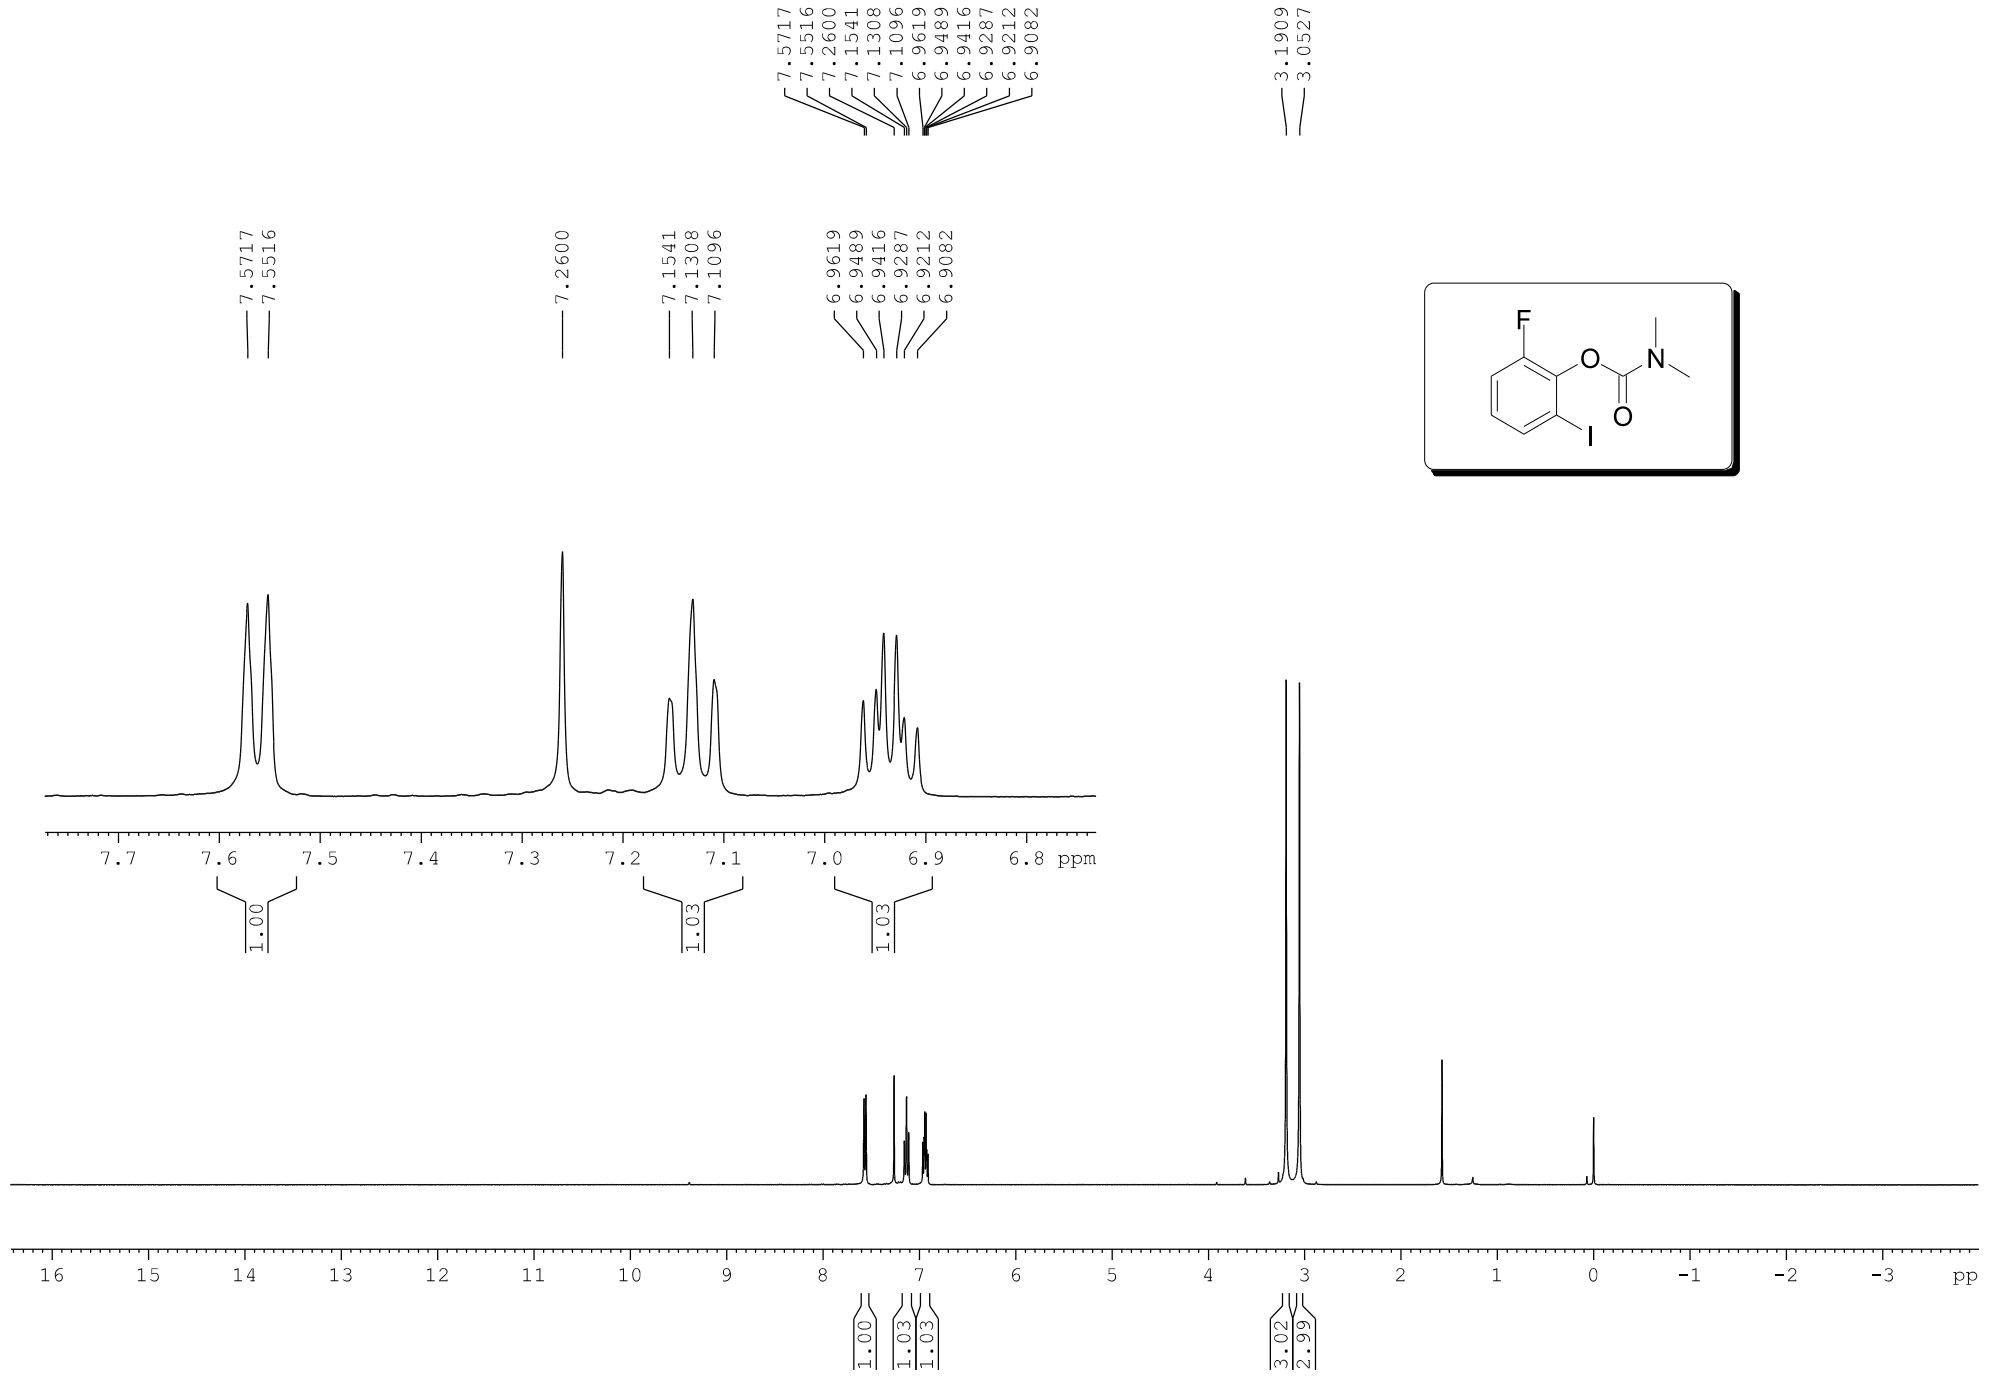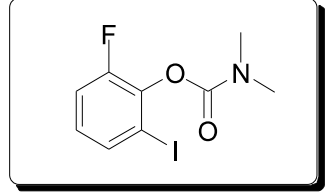

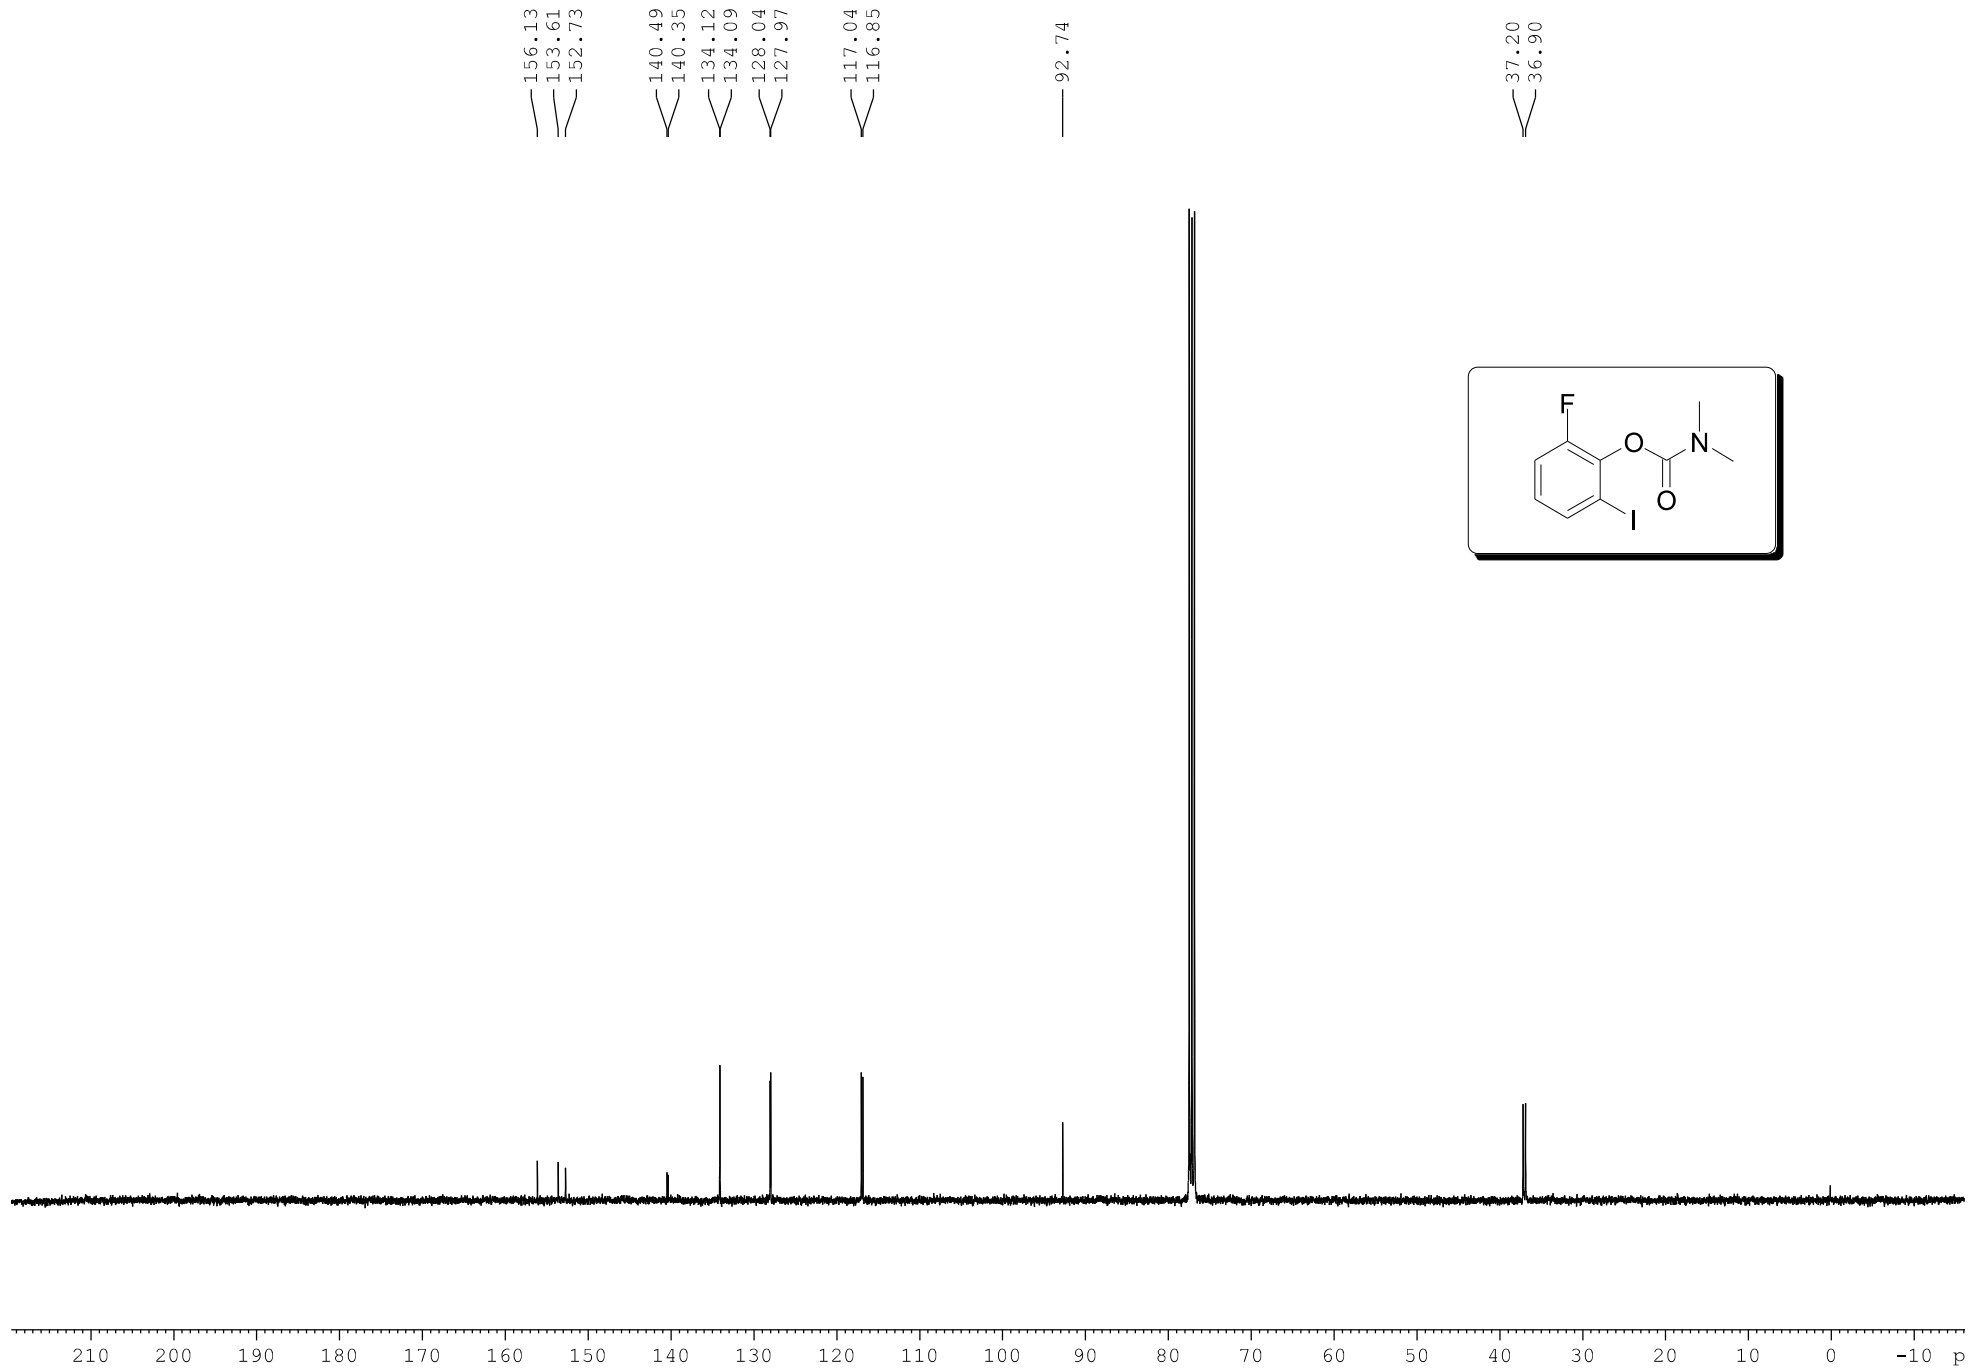

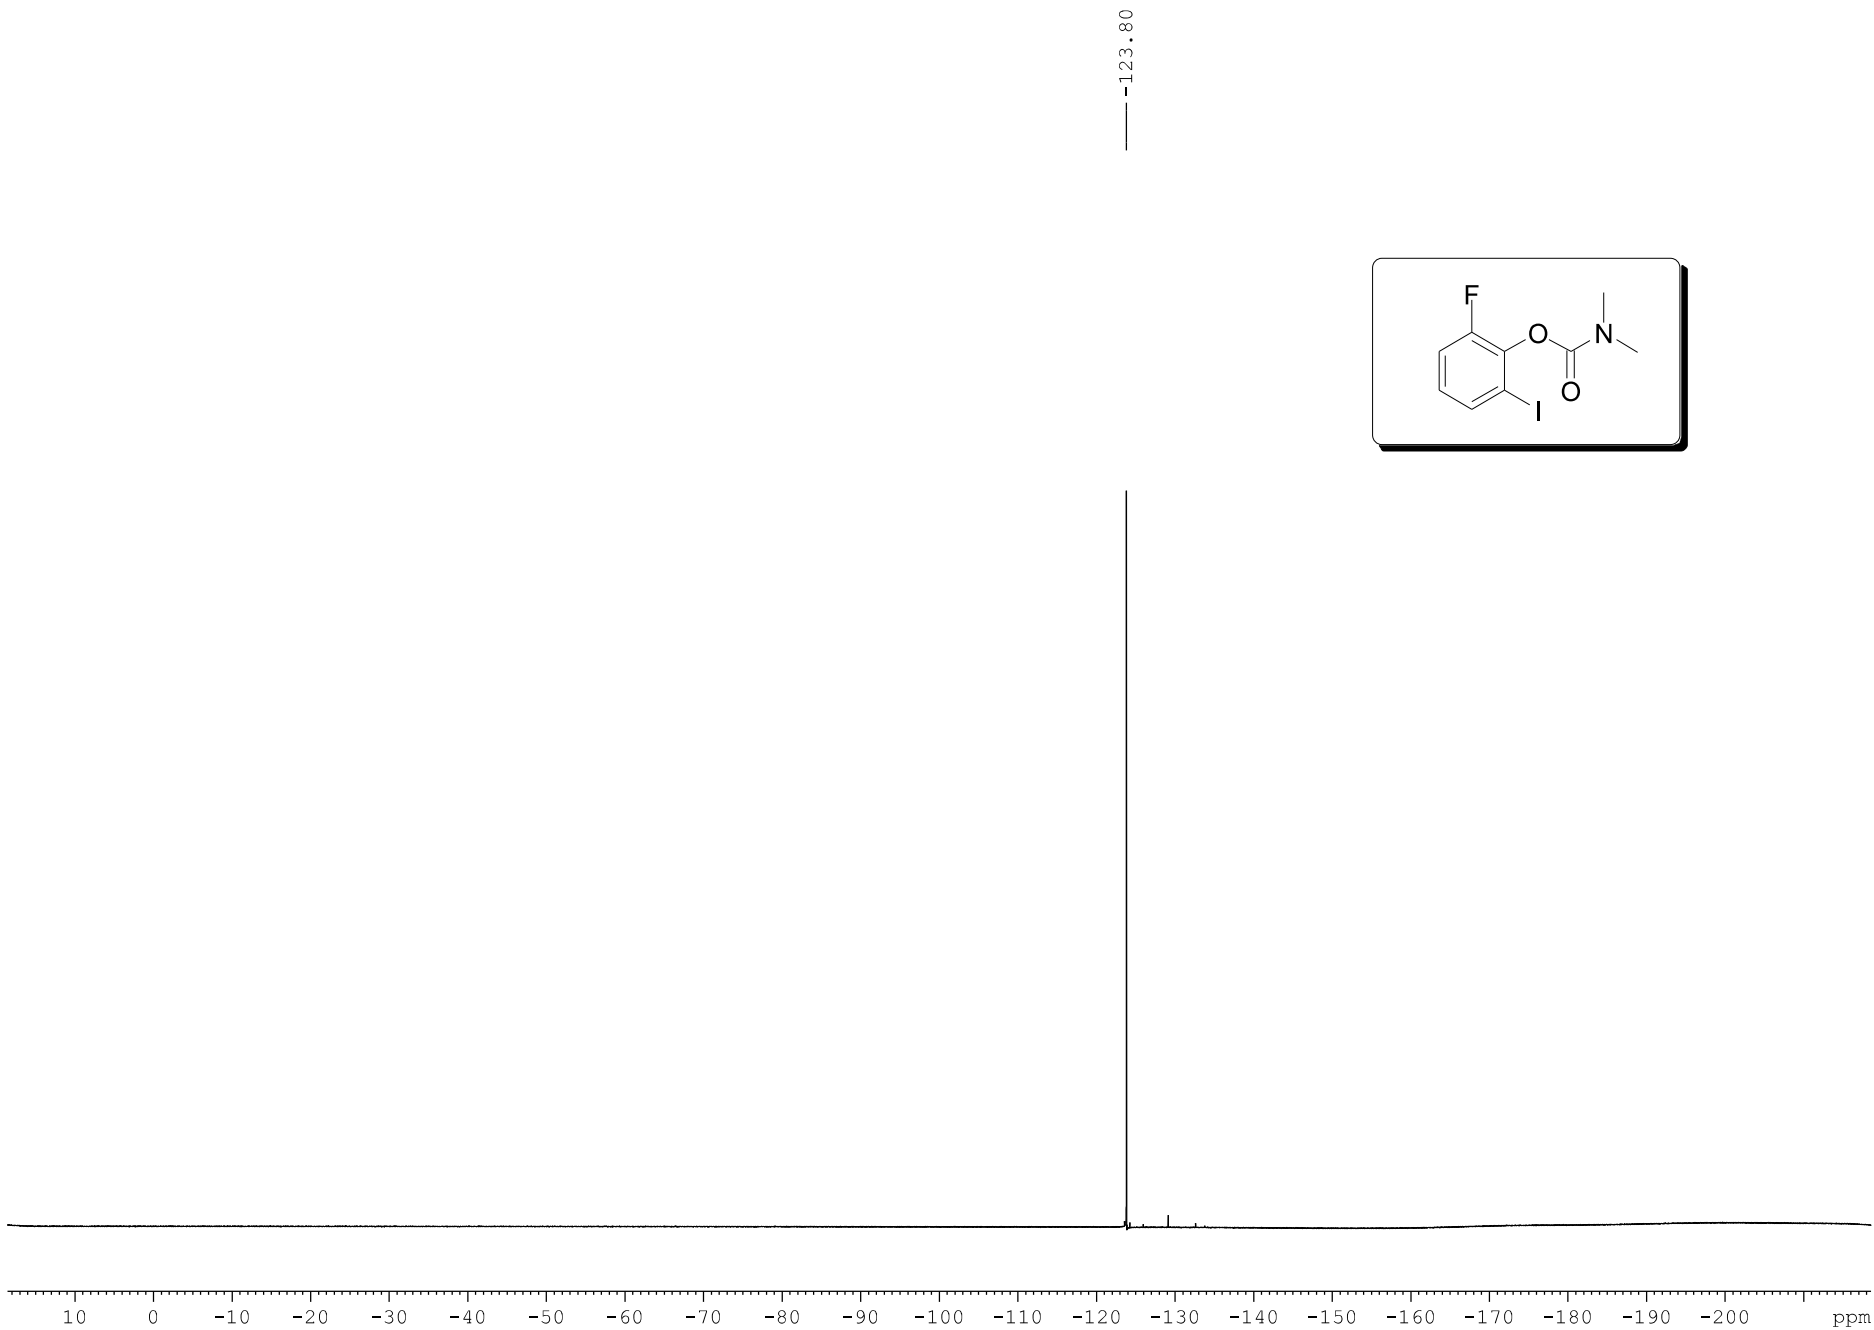



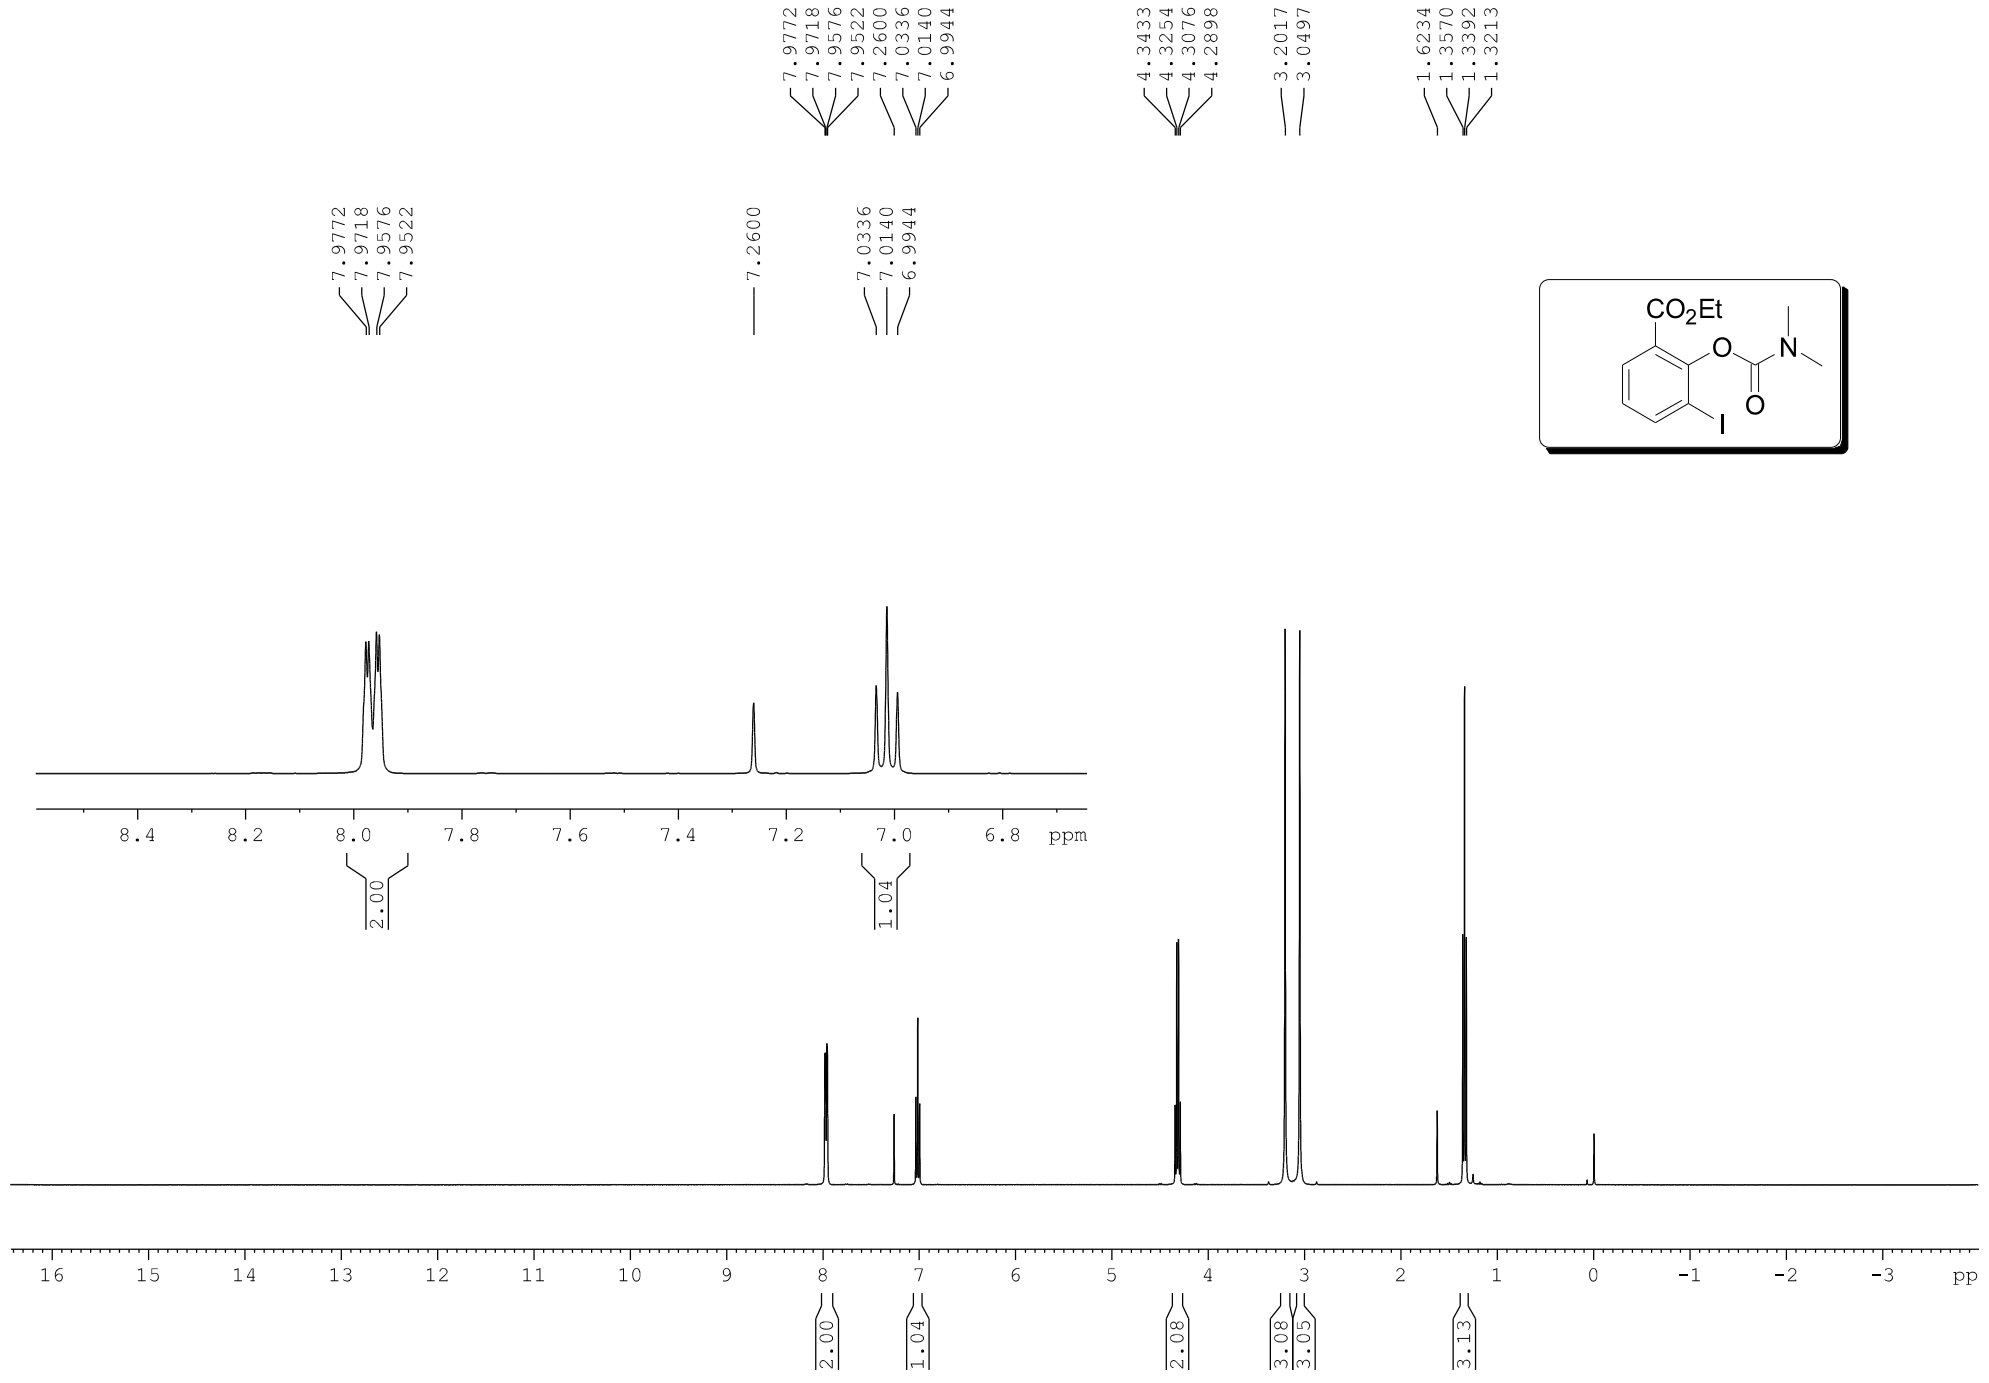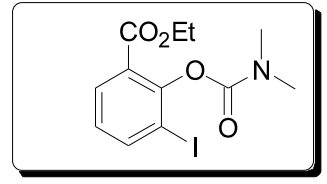

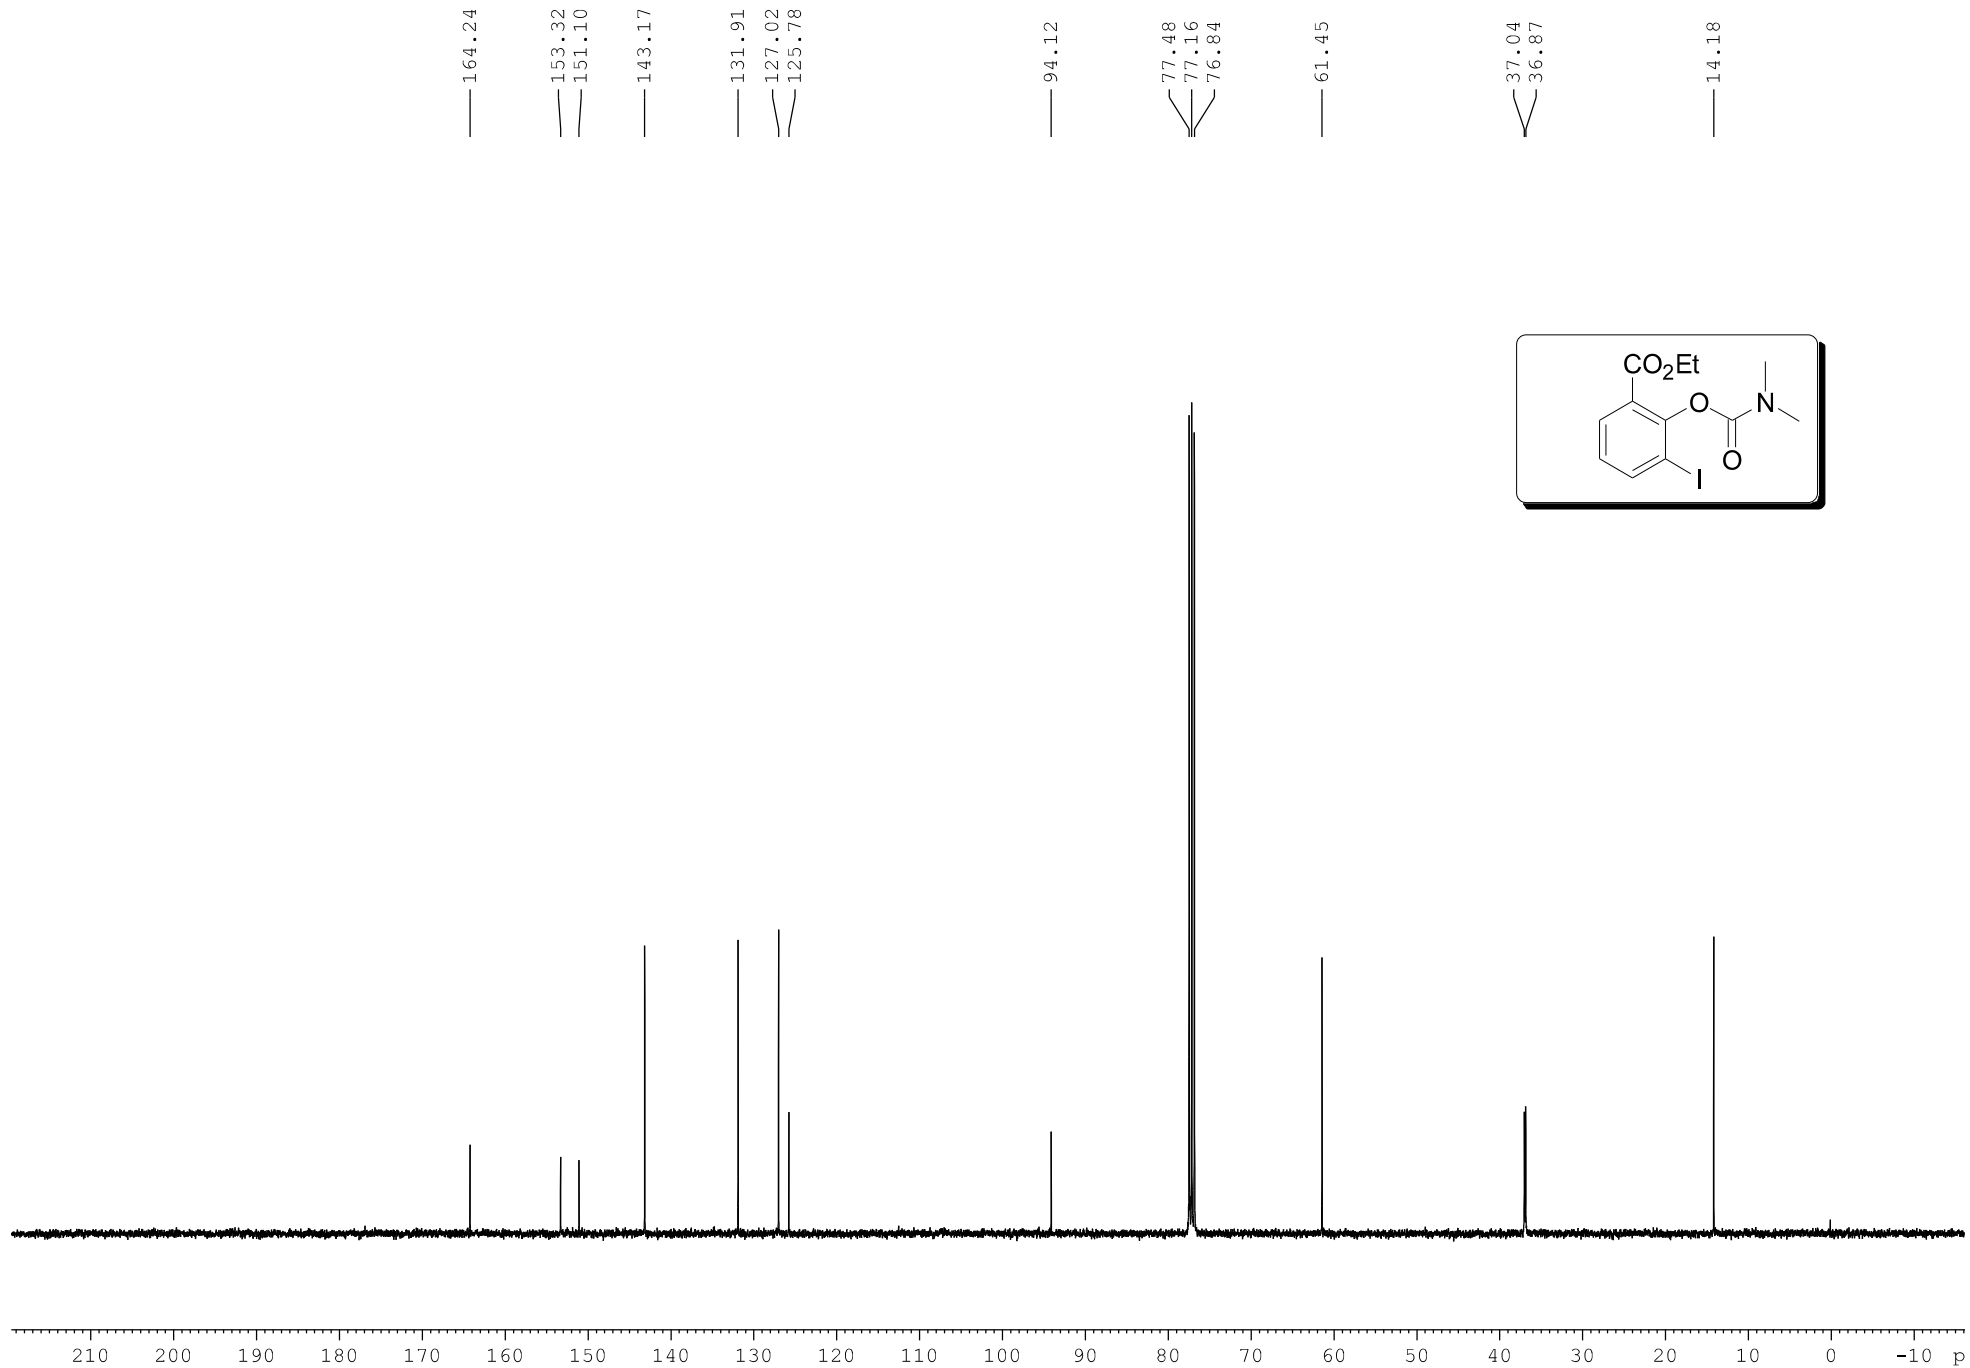

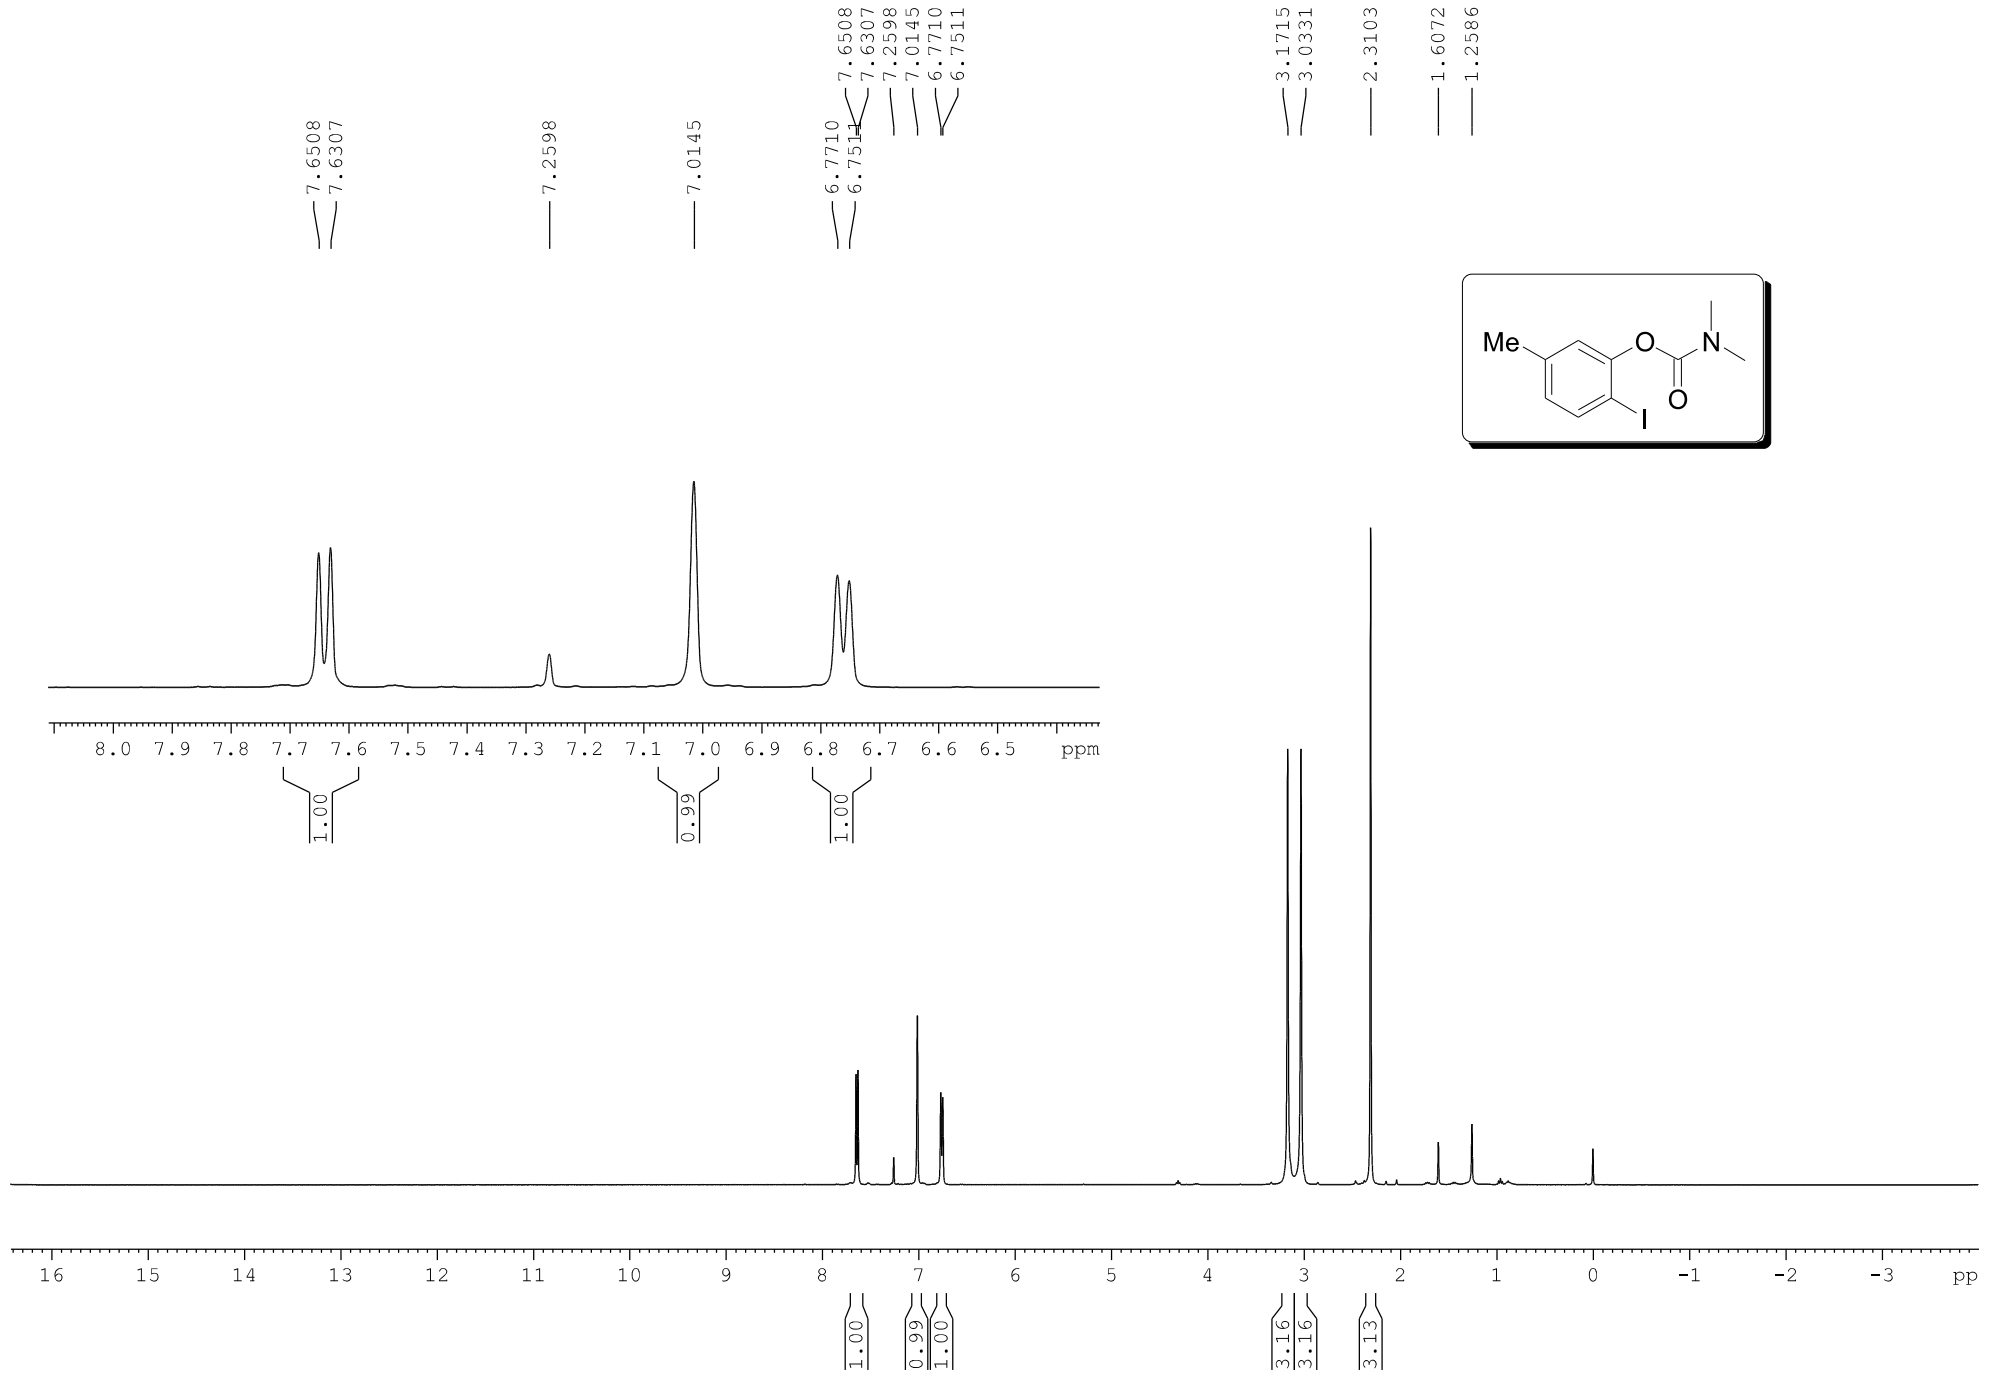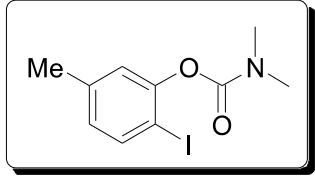

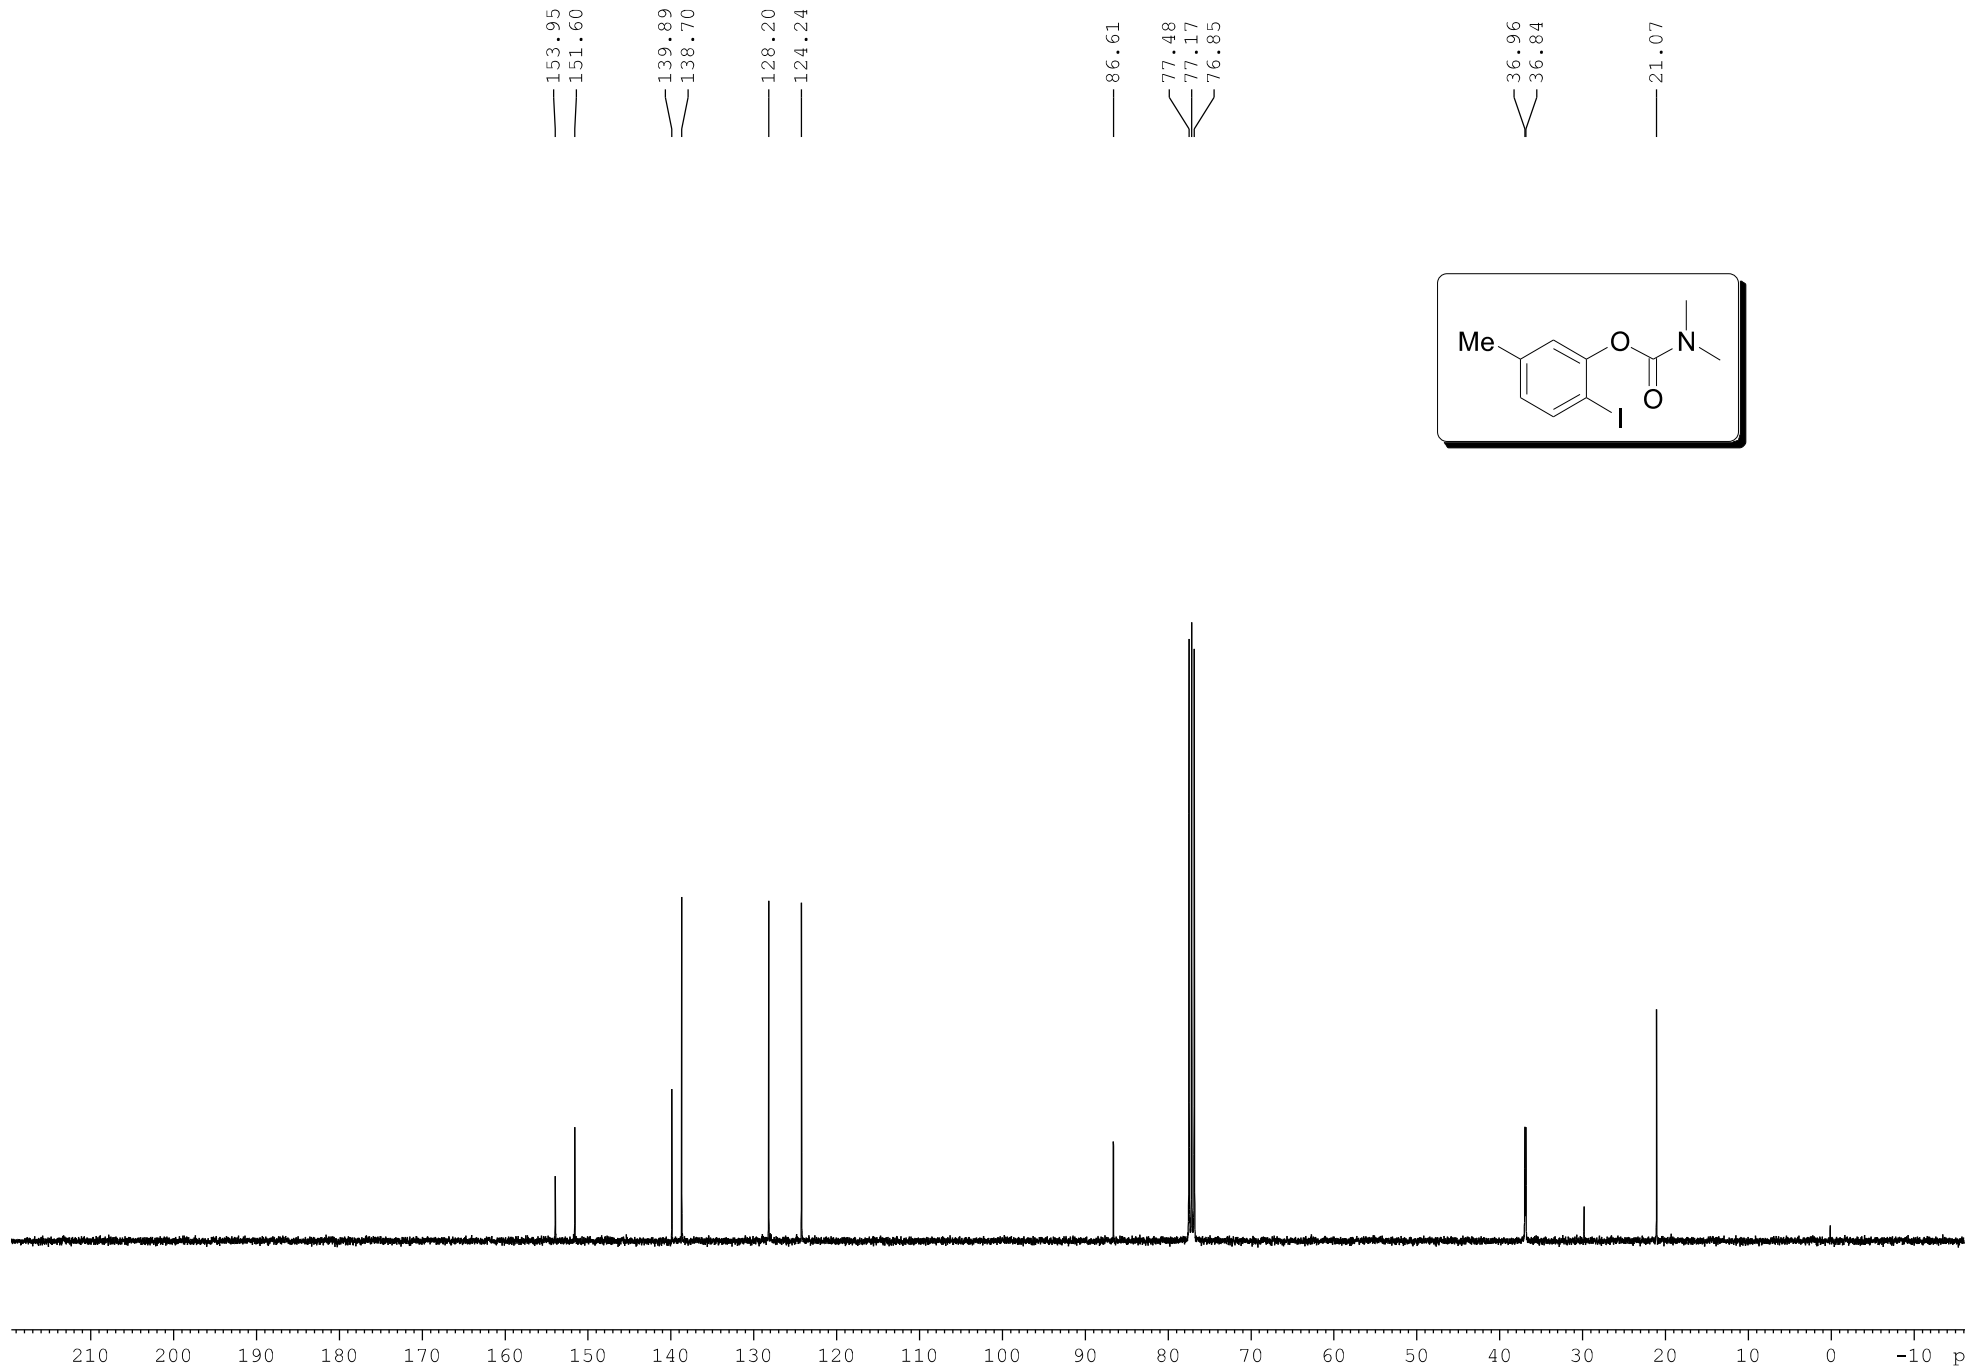

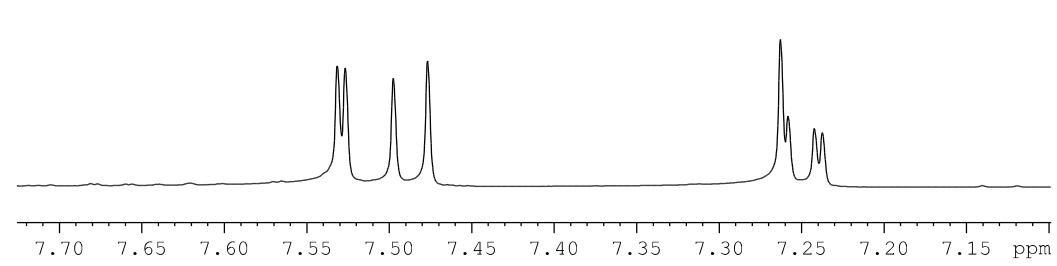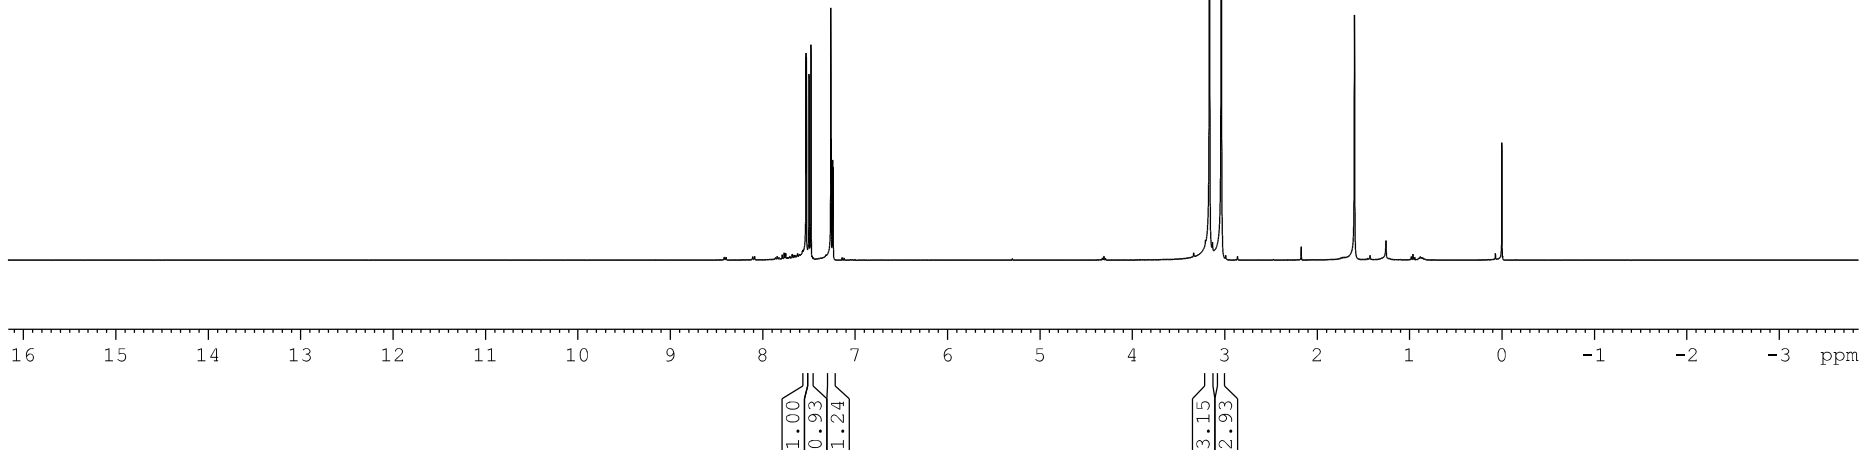

7.5315  
7.5267  
7.4975  
7.4767  
7.2628  
7.2582  
7.2423  
7.2374

3.1639  
3.0362

1.5951

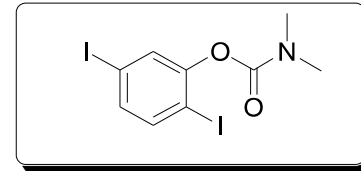

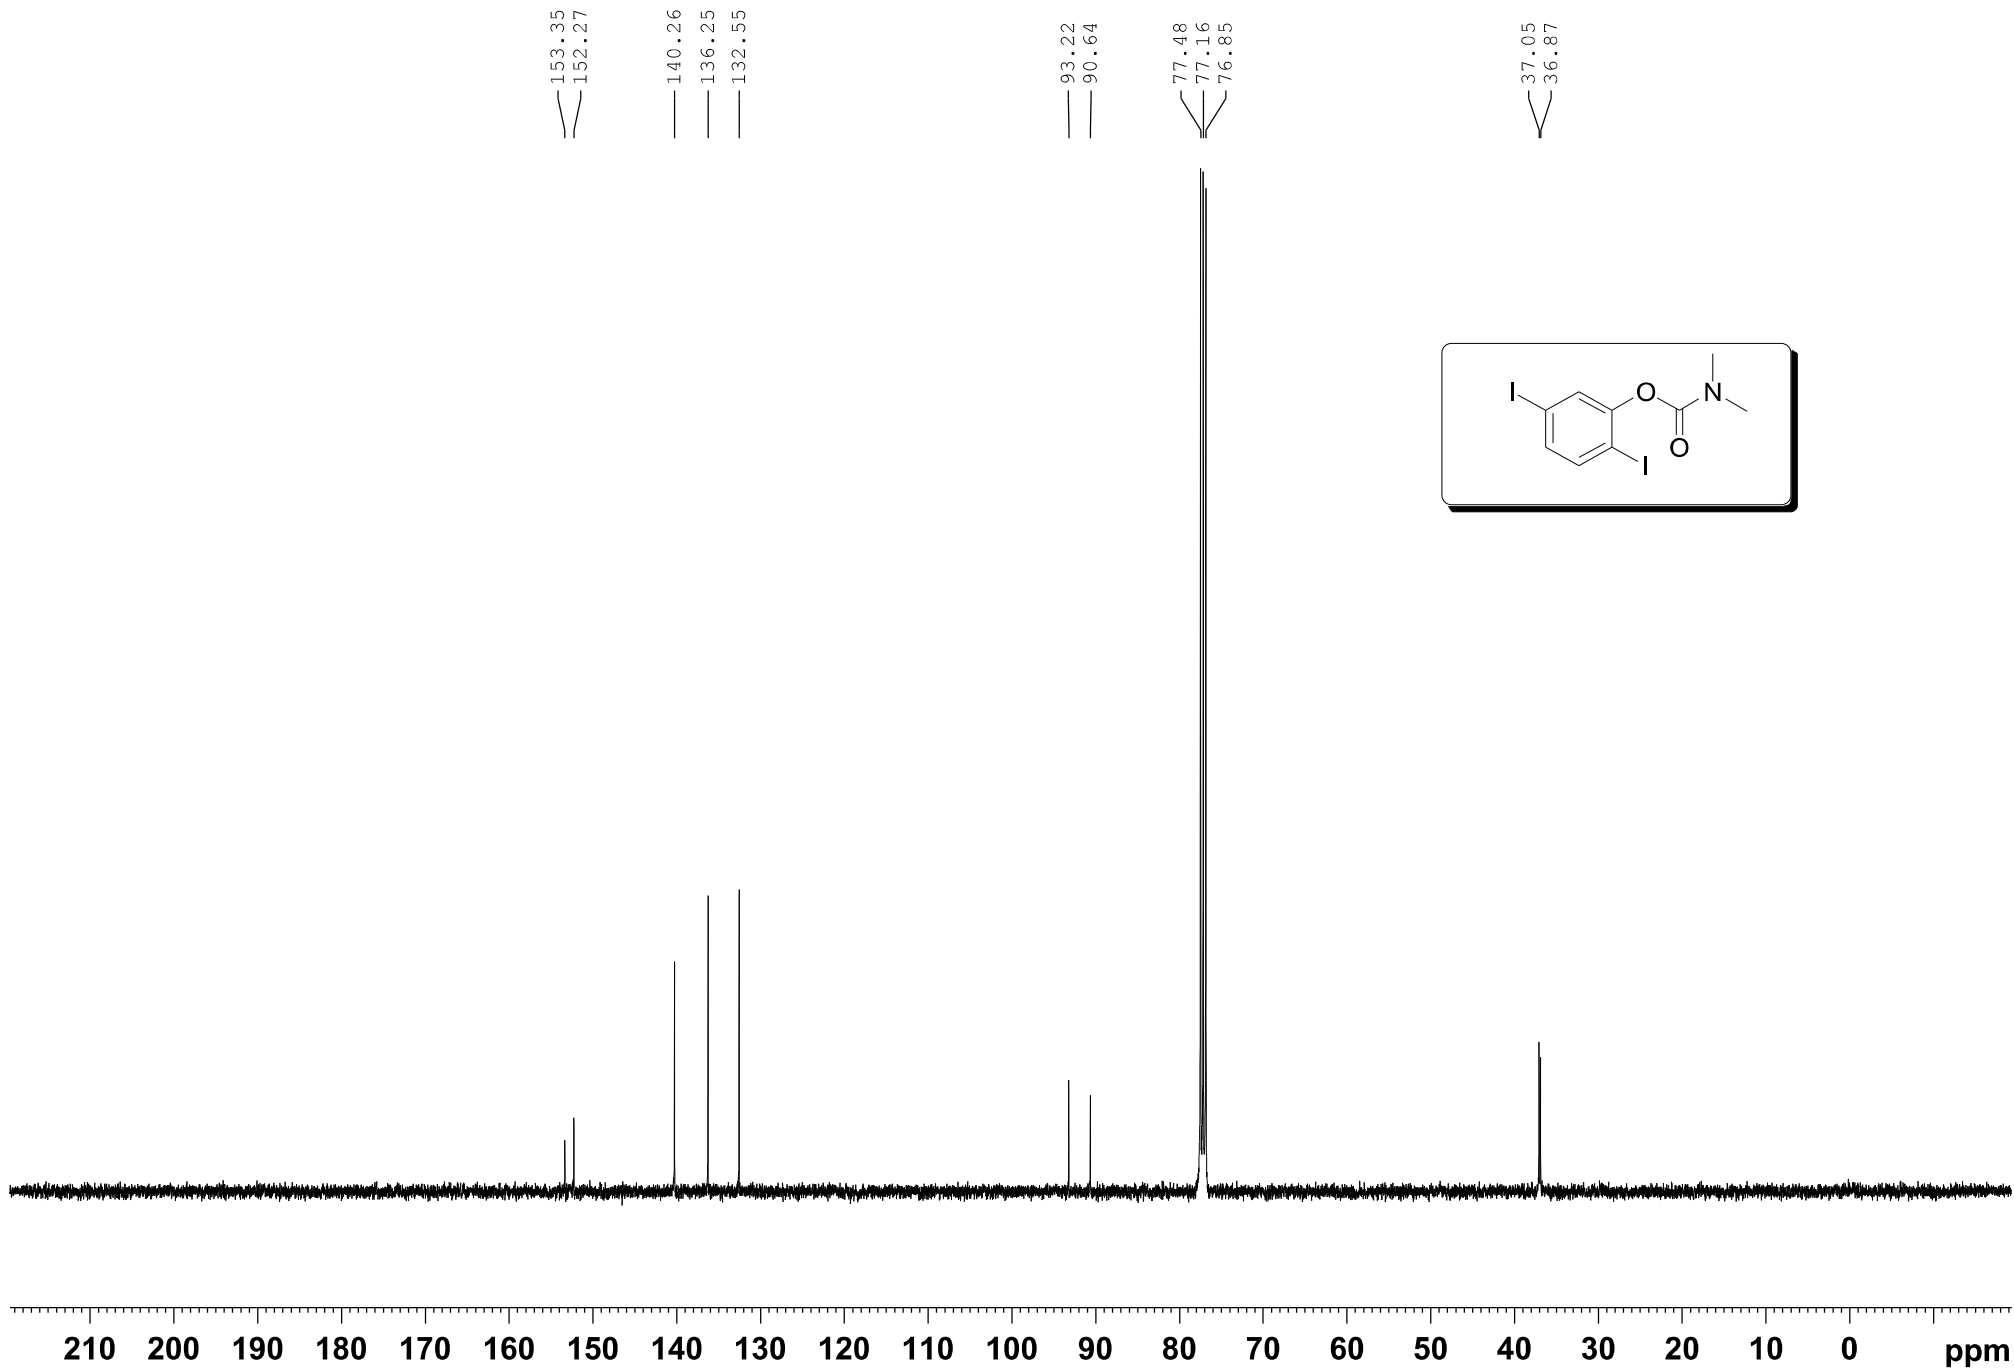

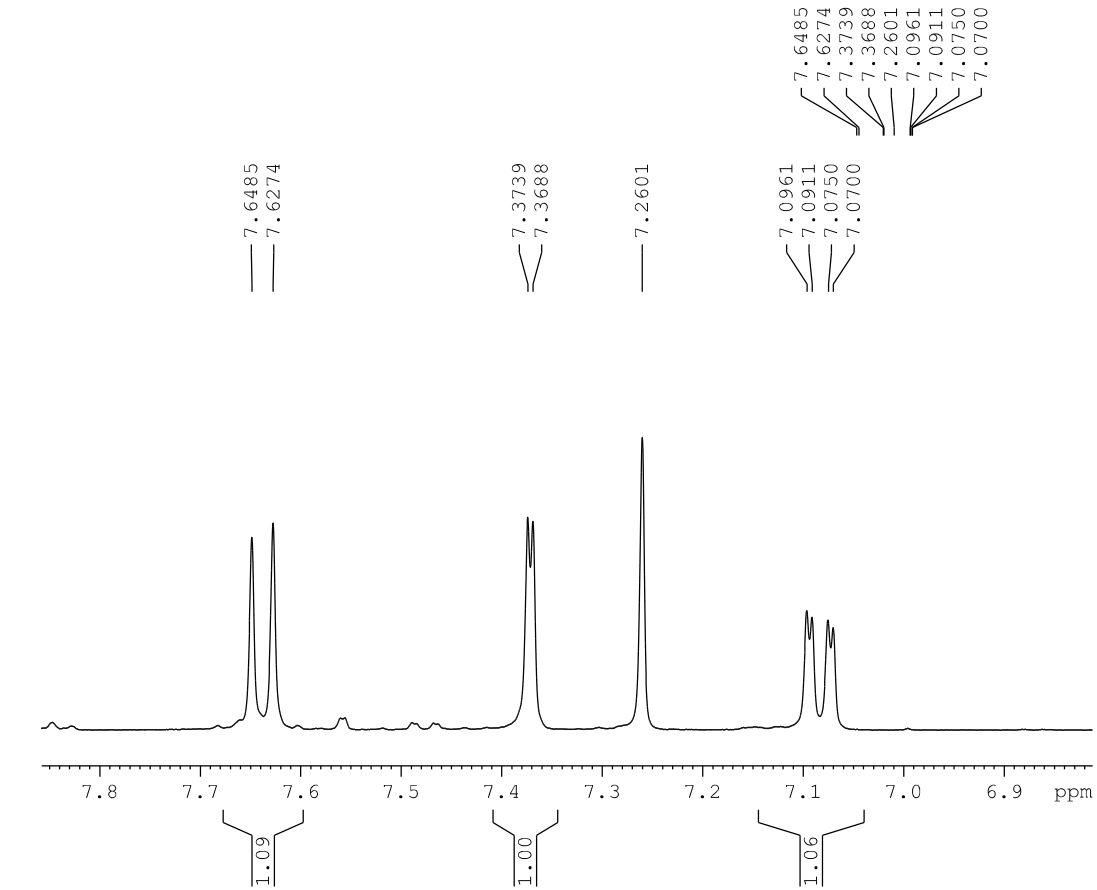

3.1706  
3.0390

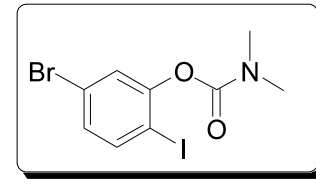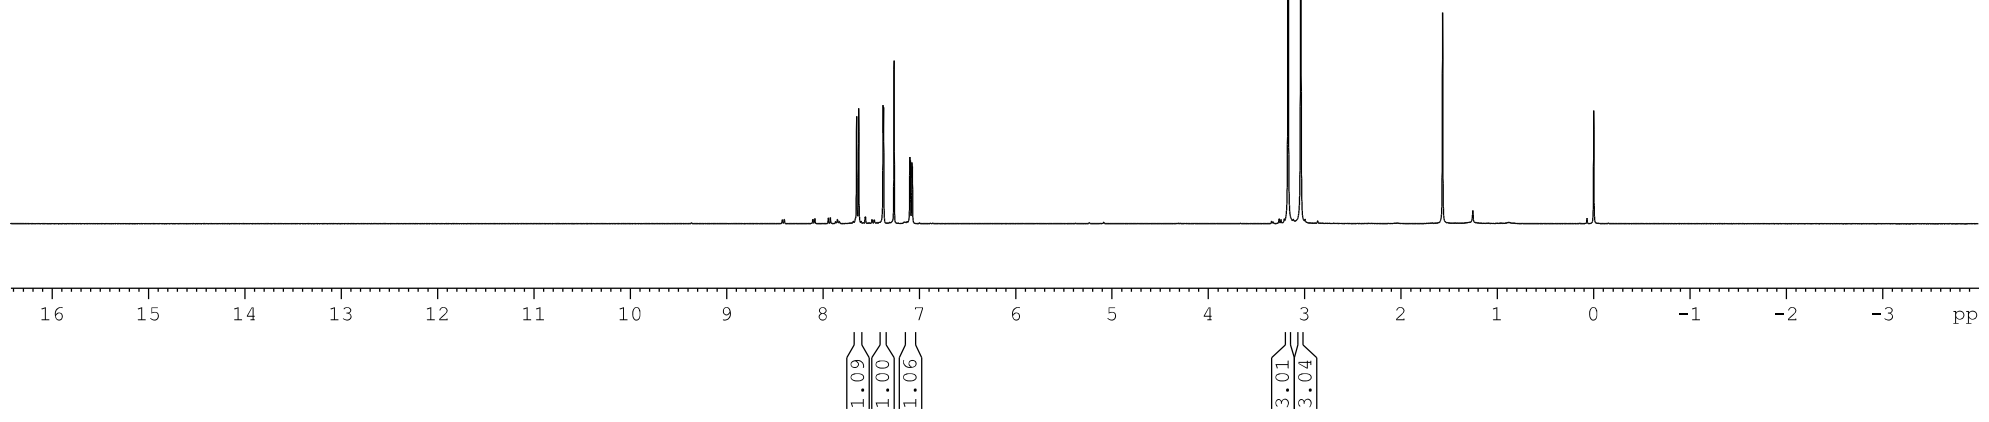

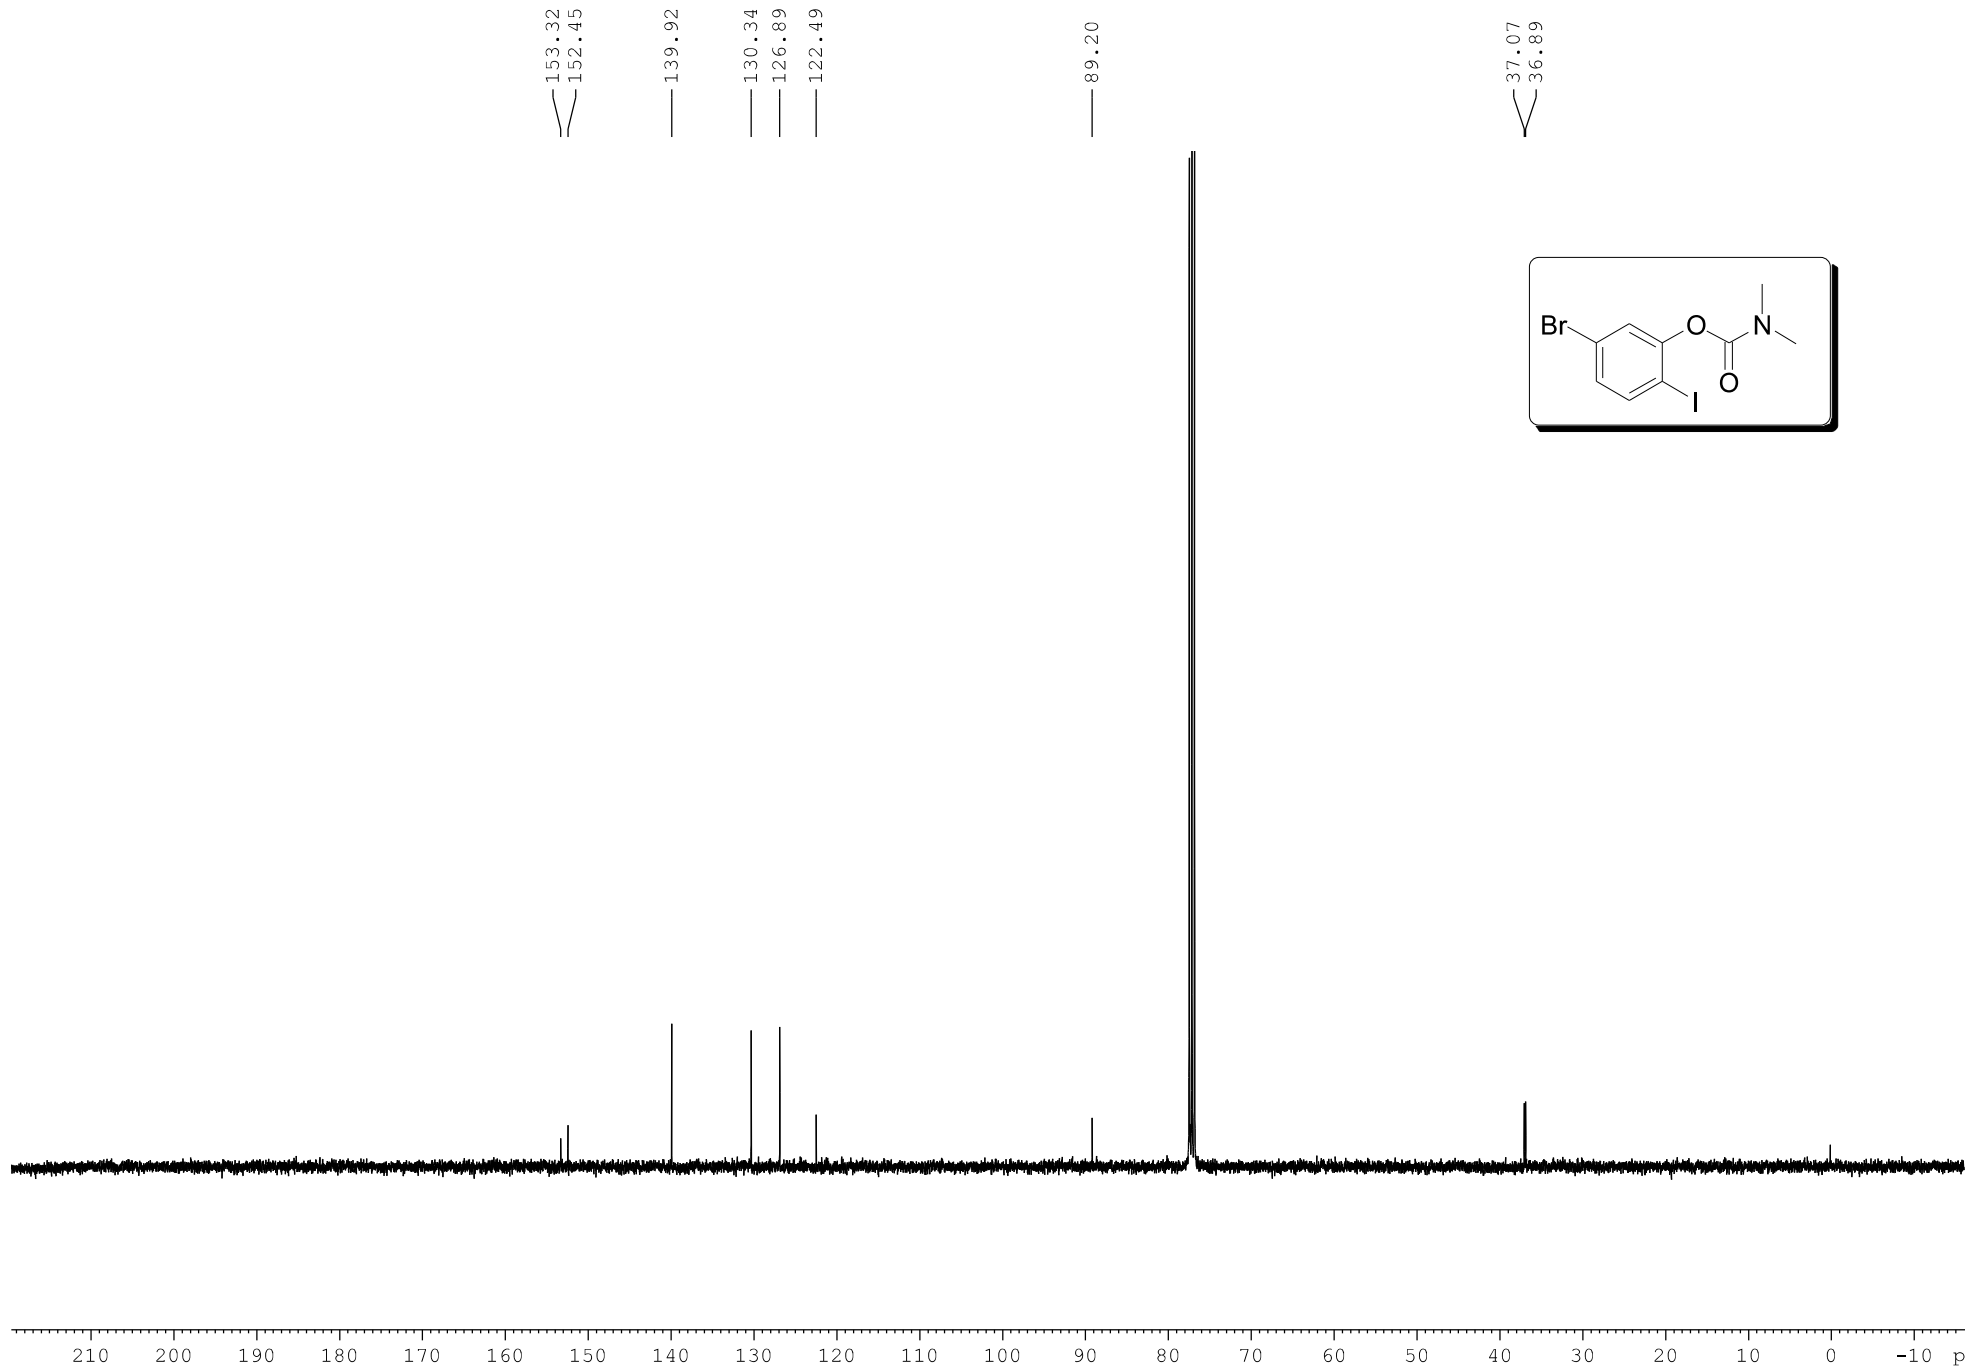



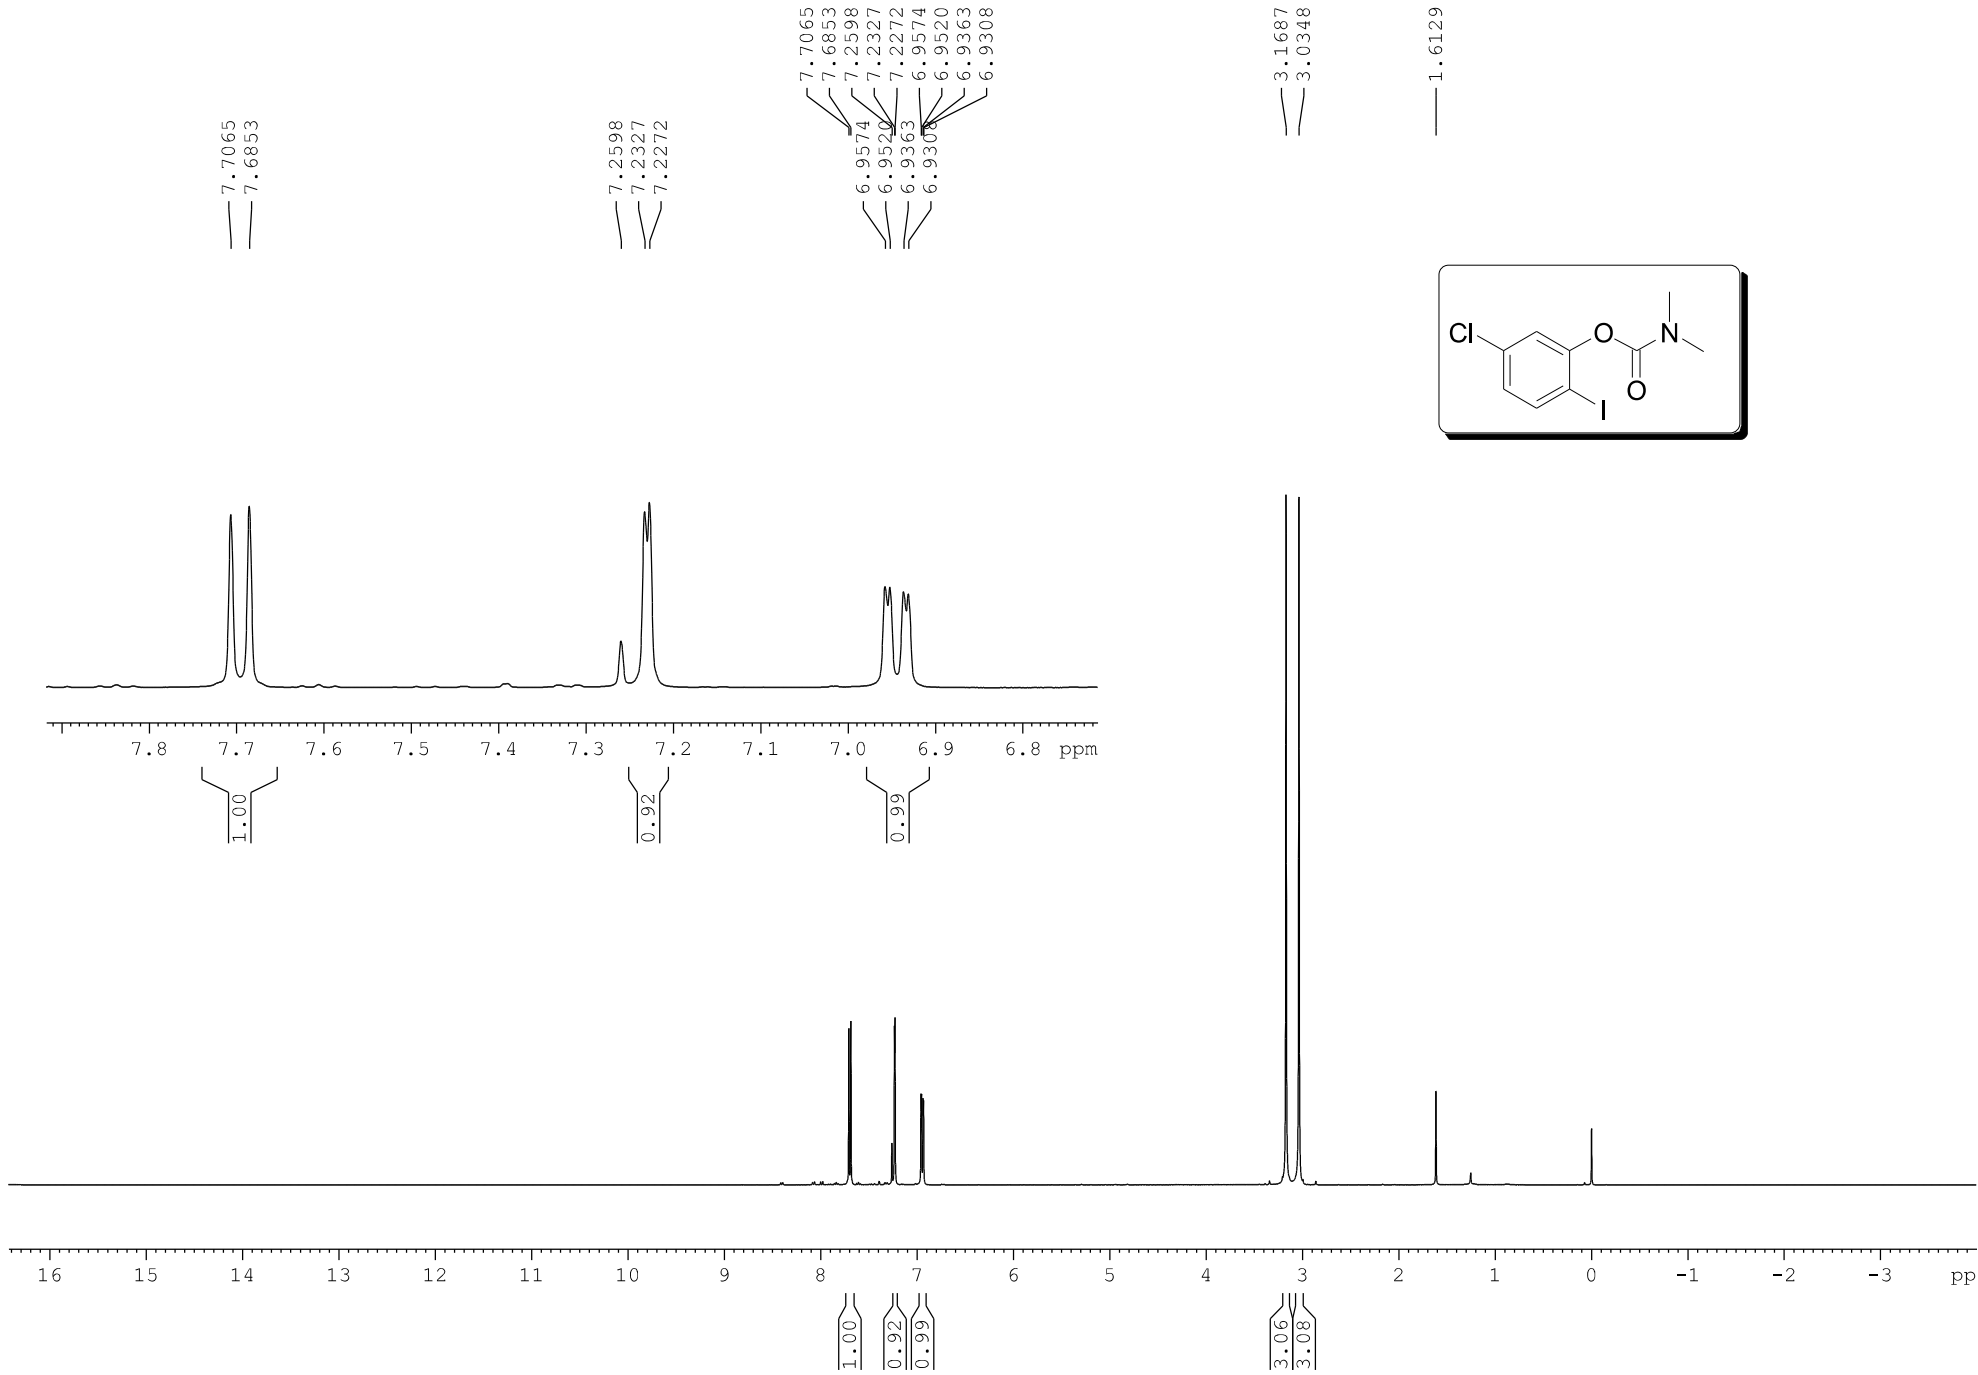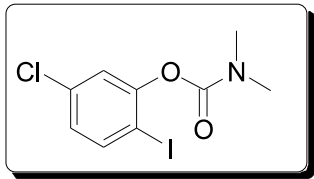

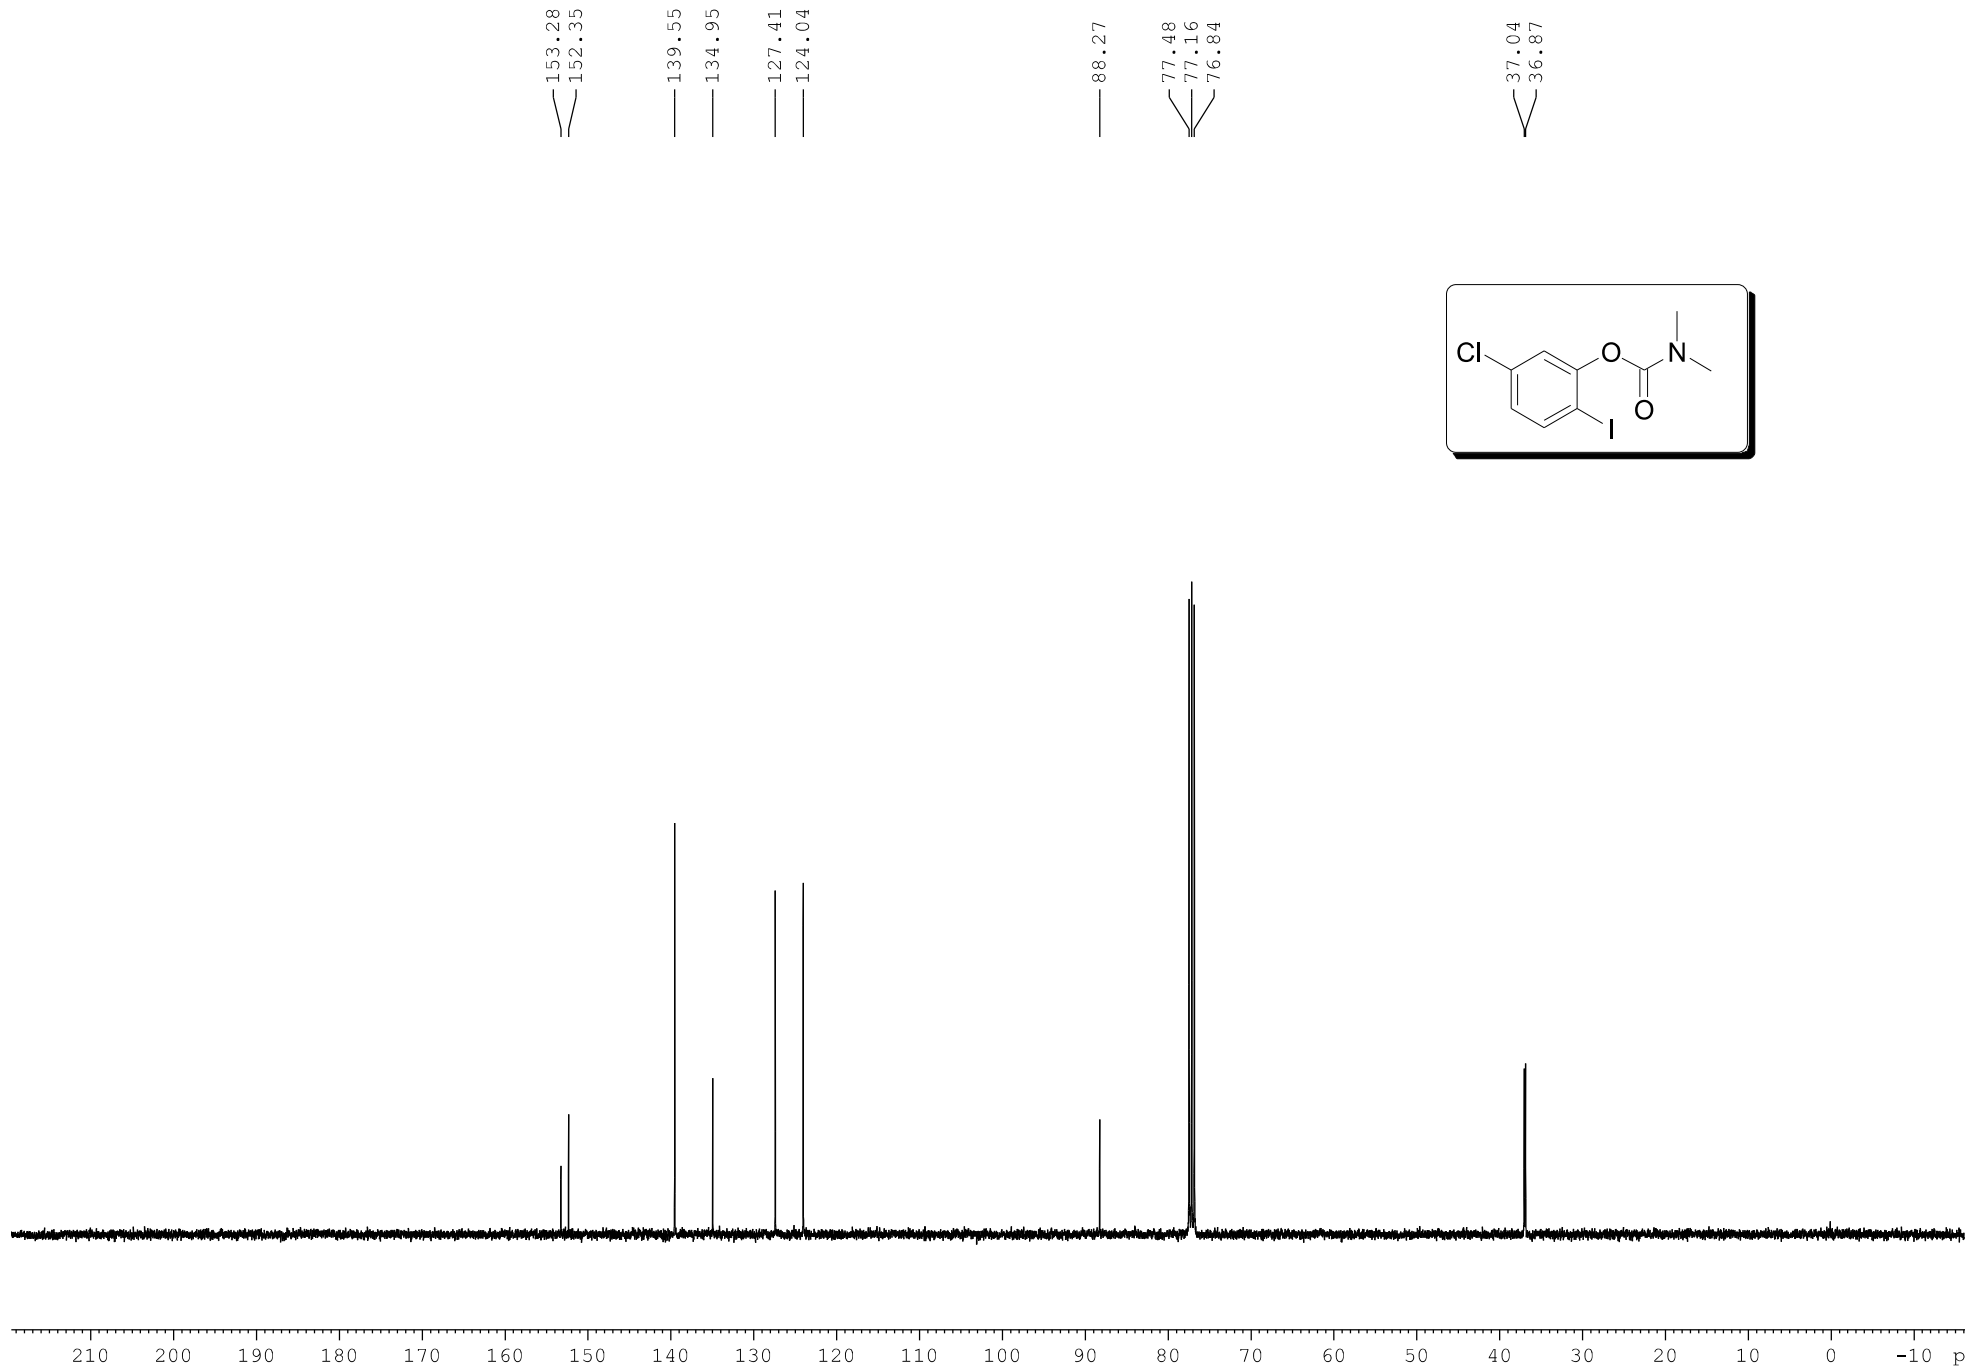

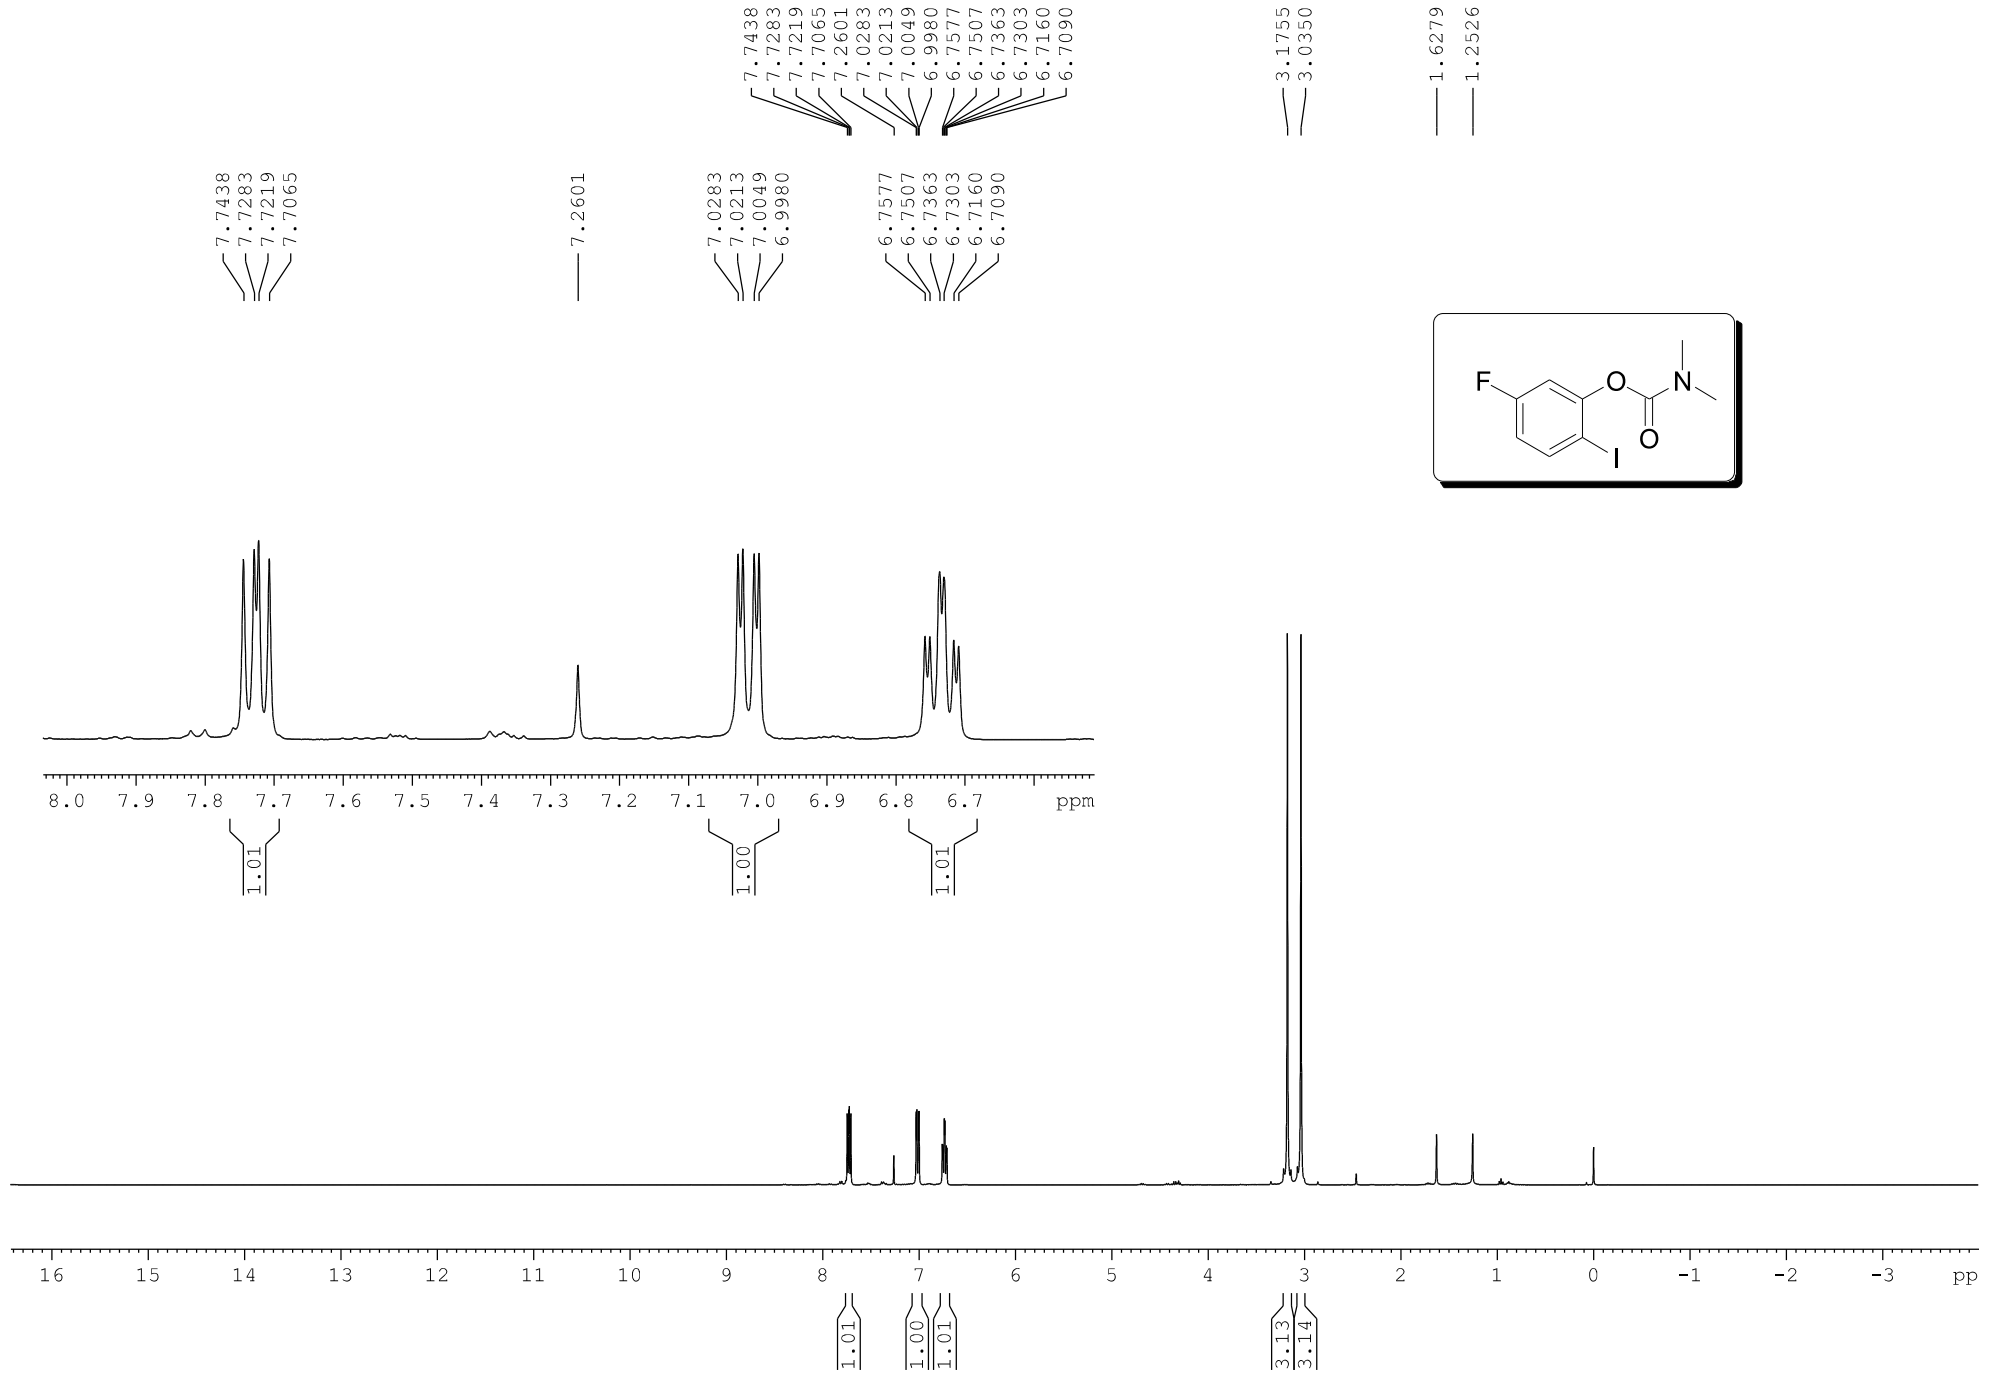

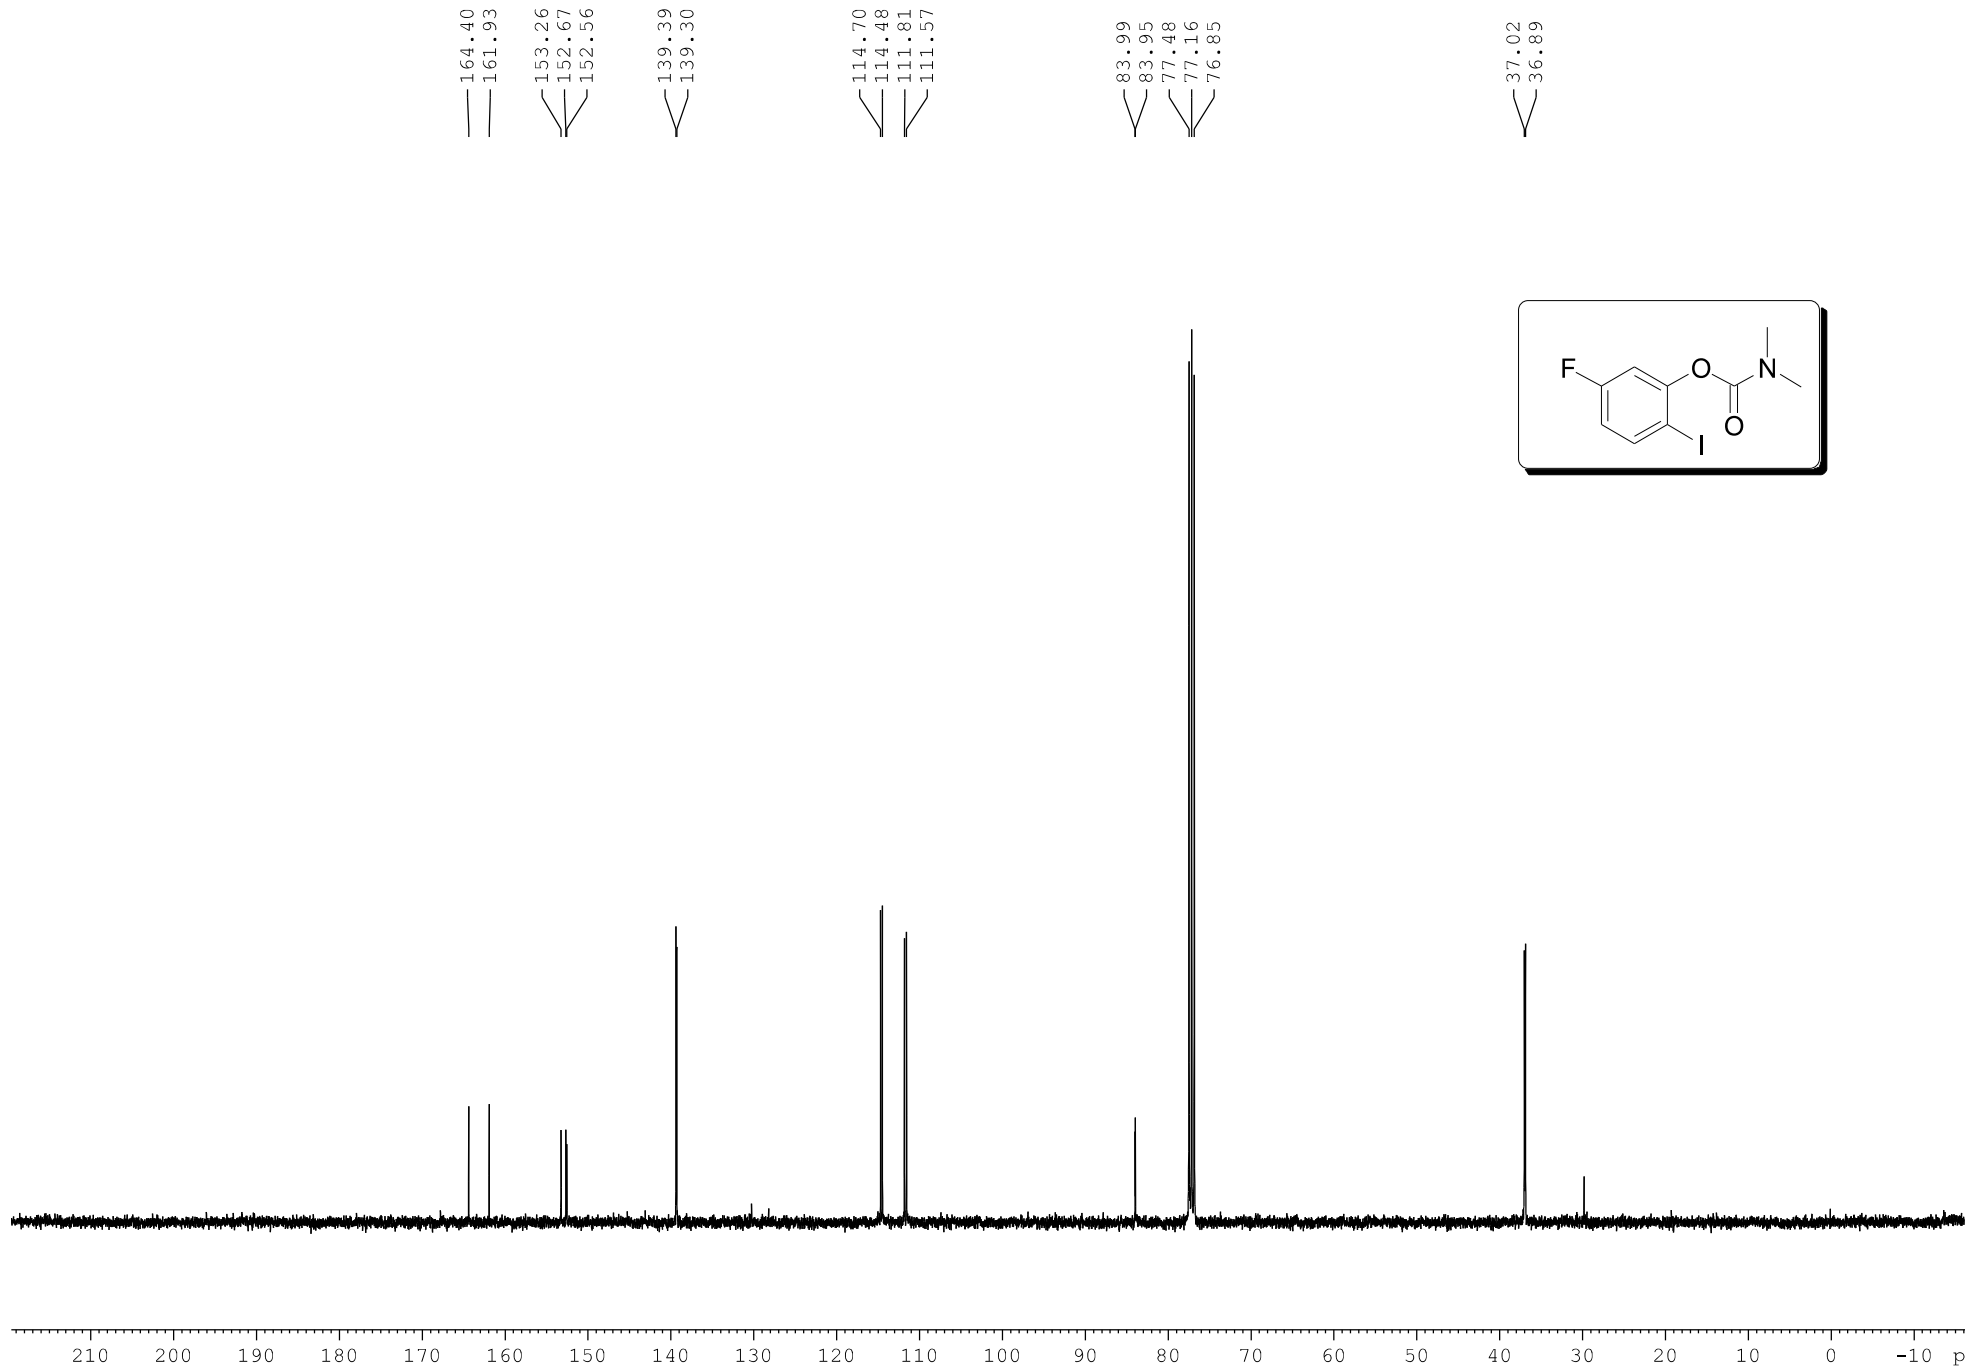

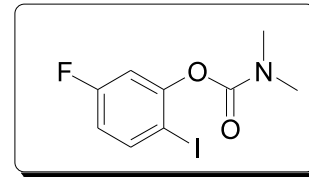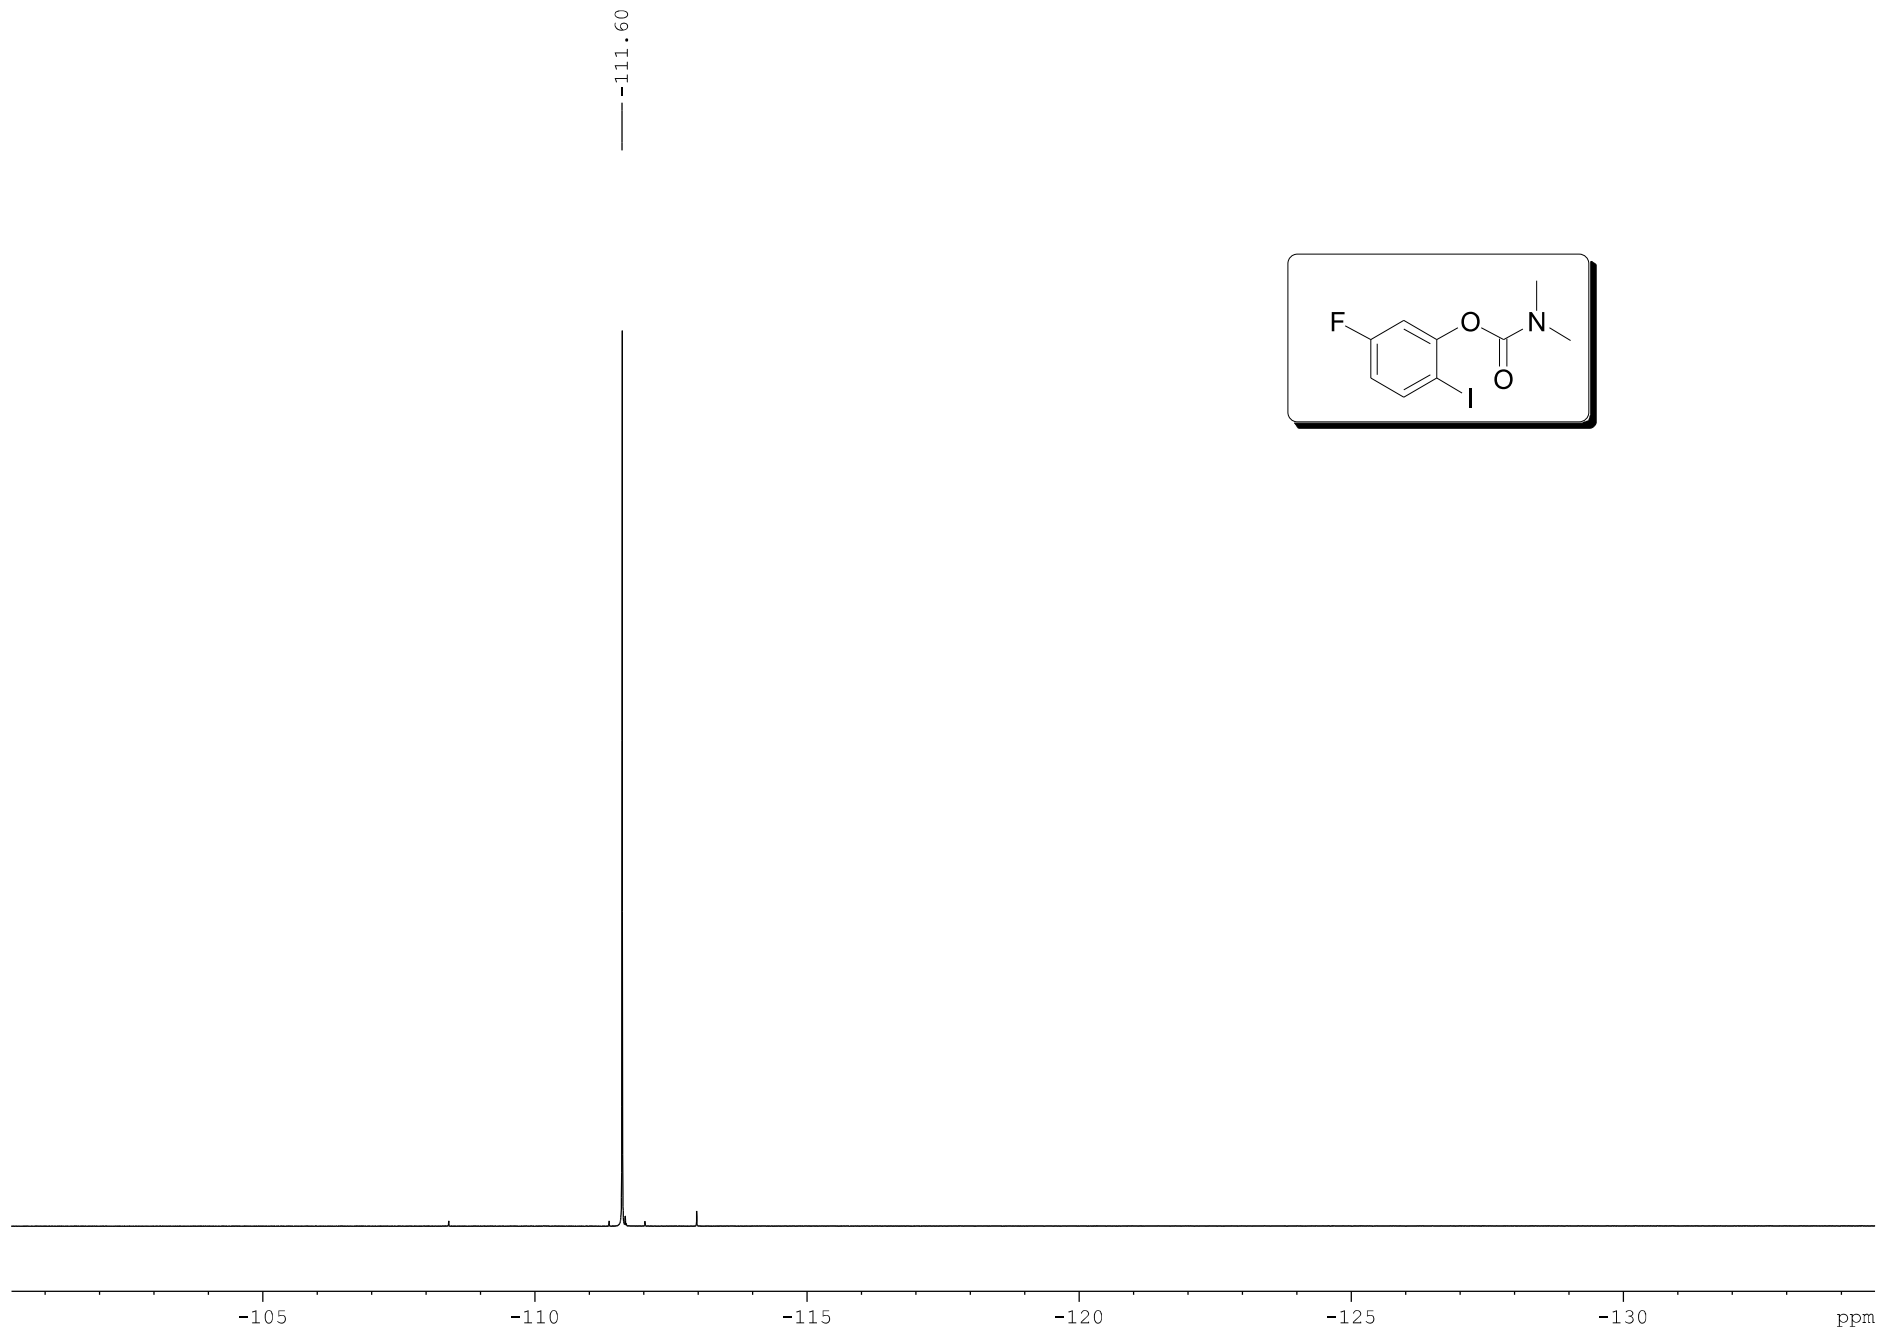

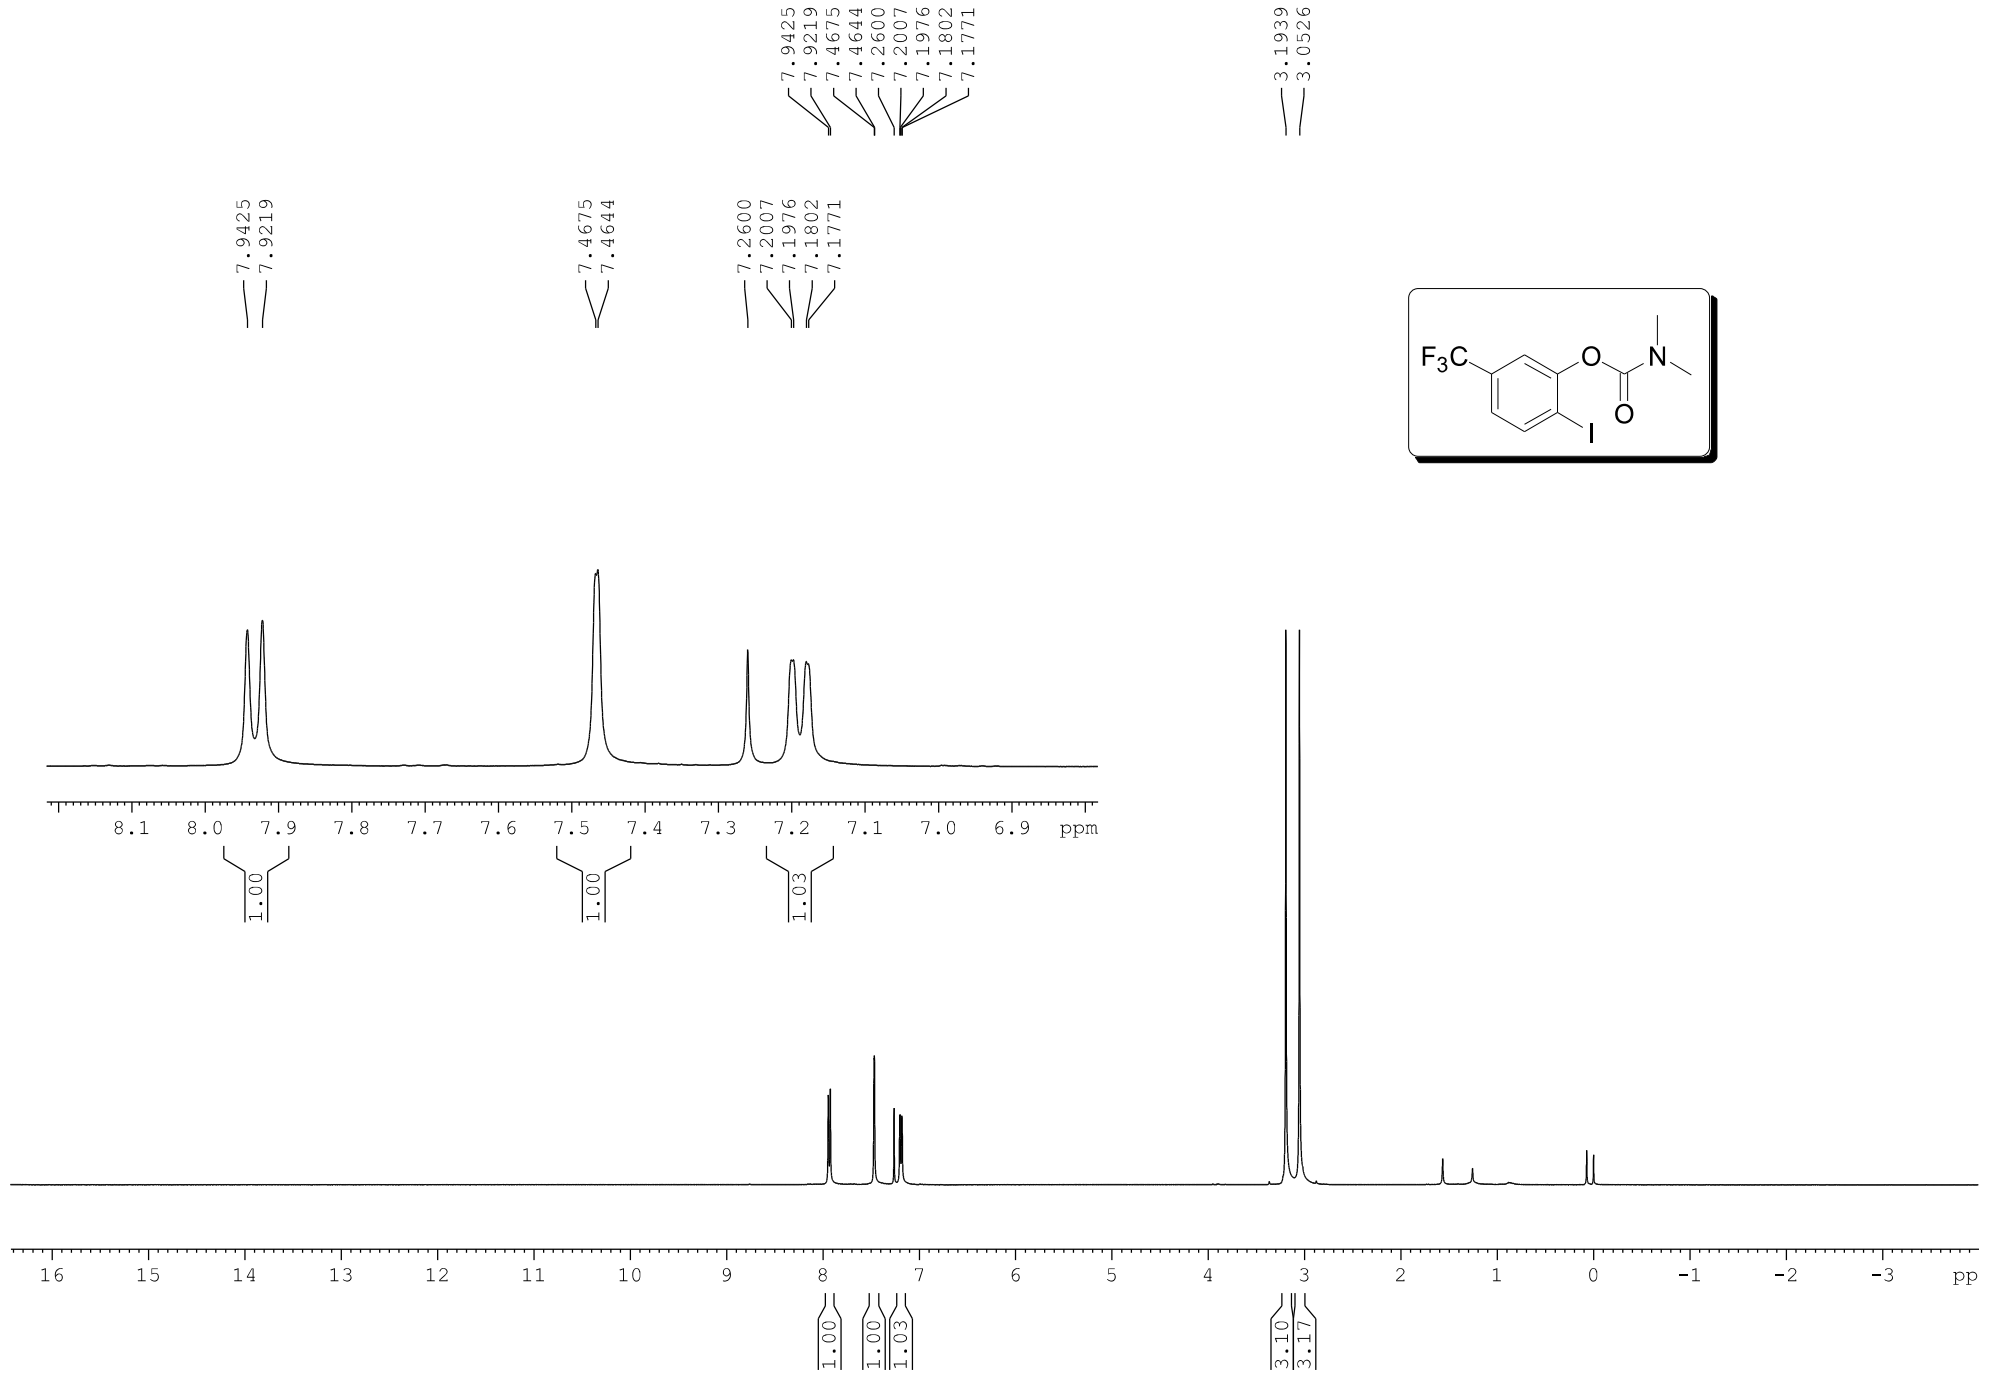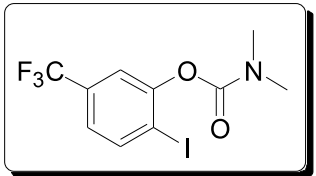

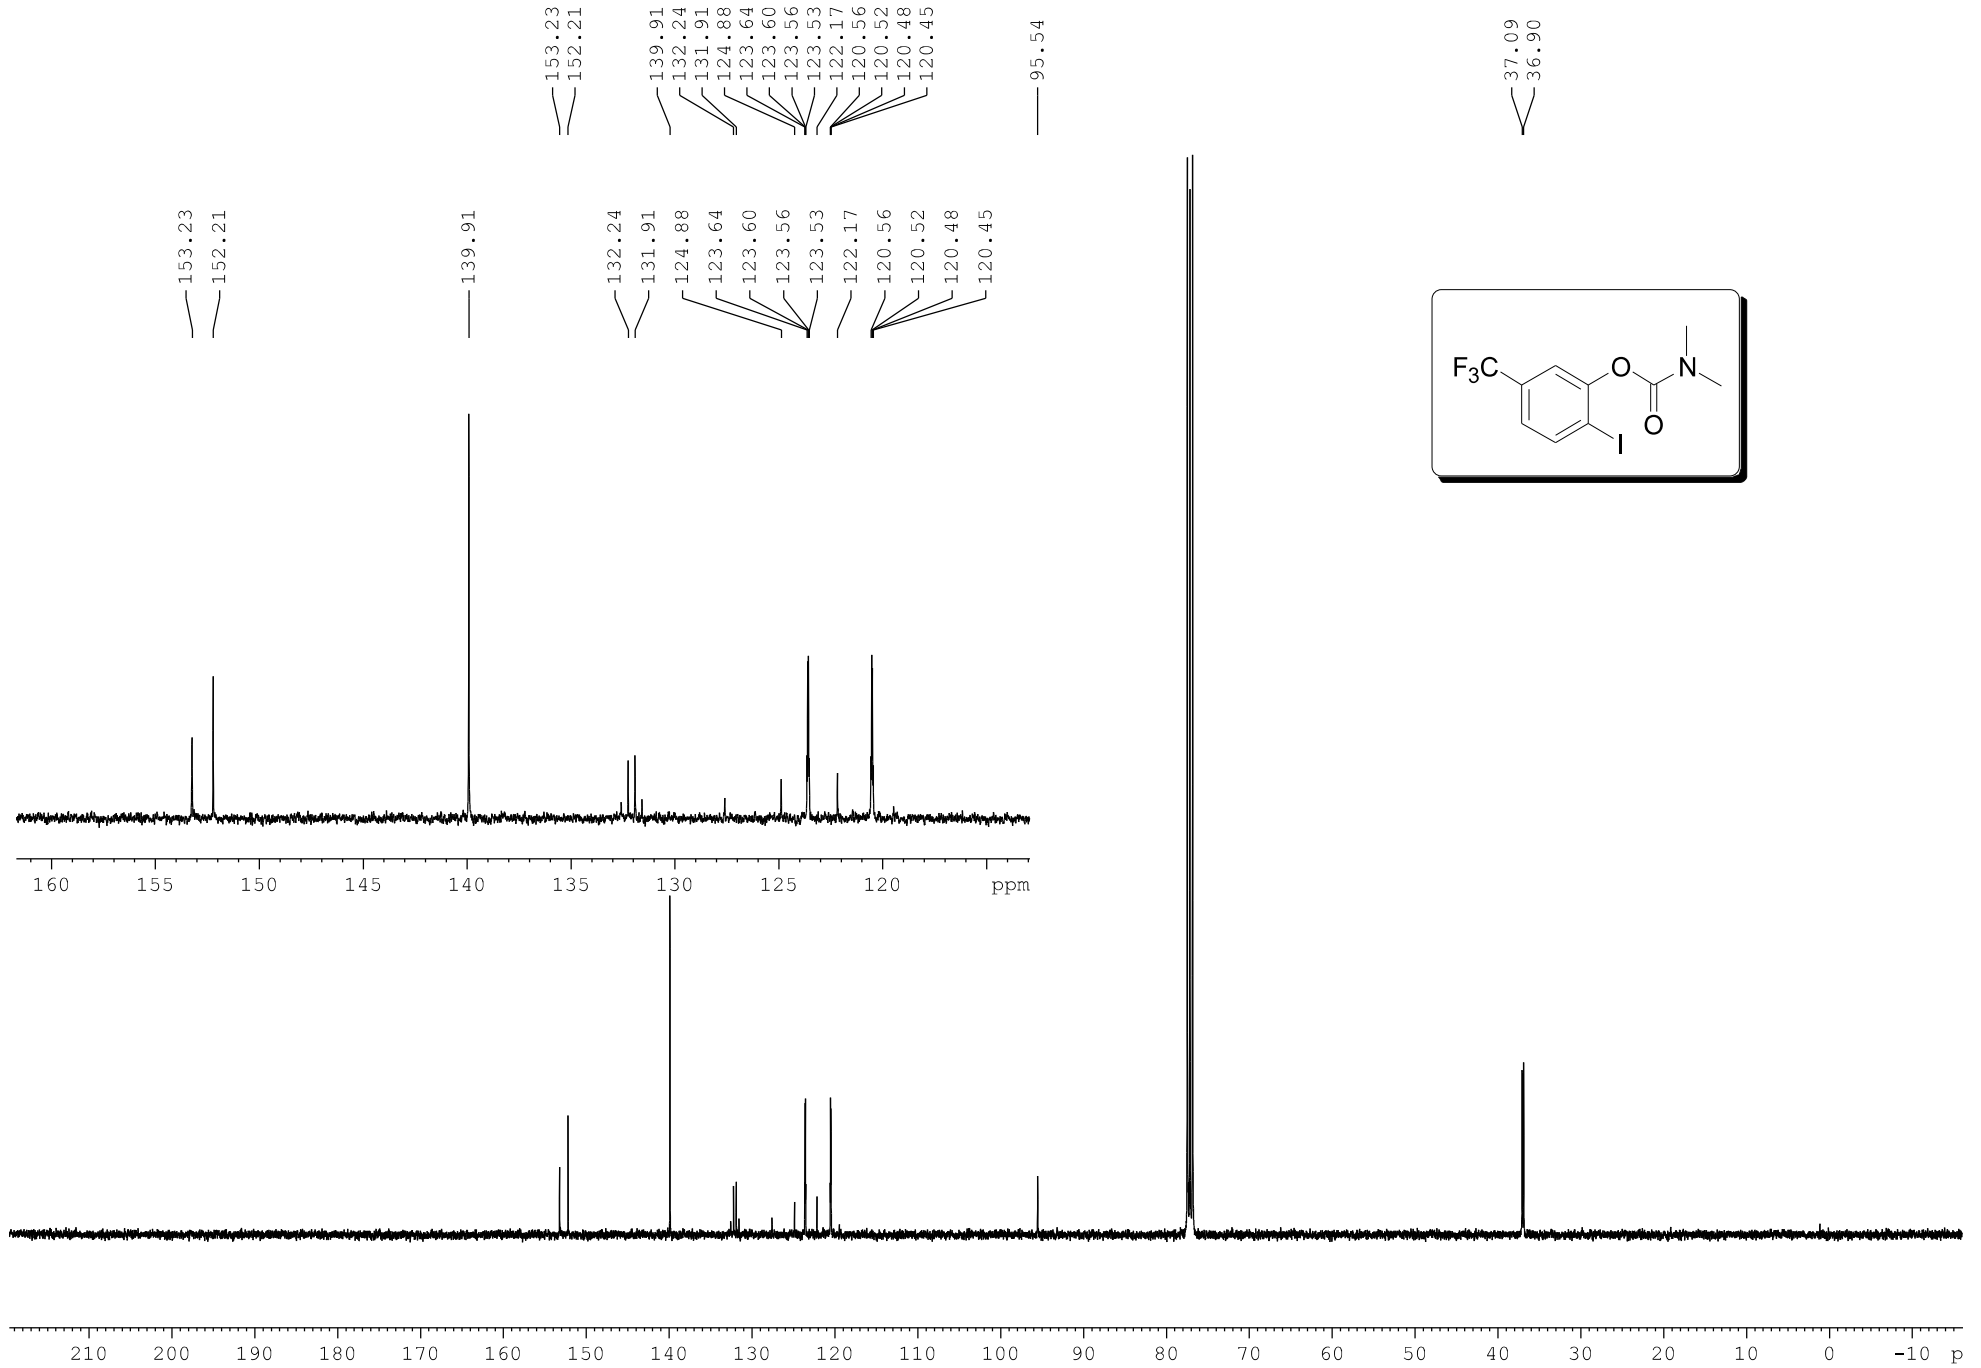

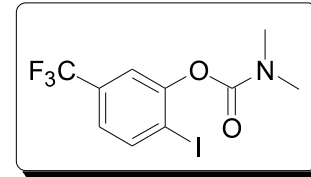

62.85

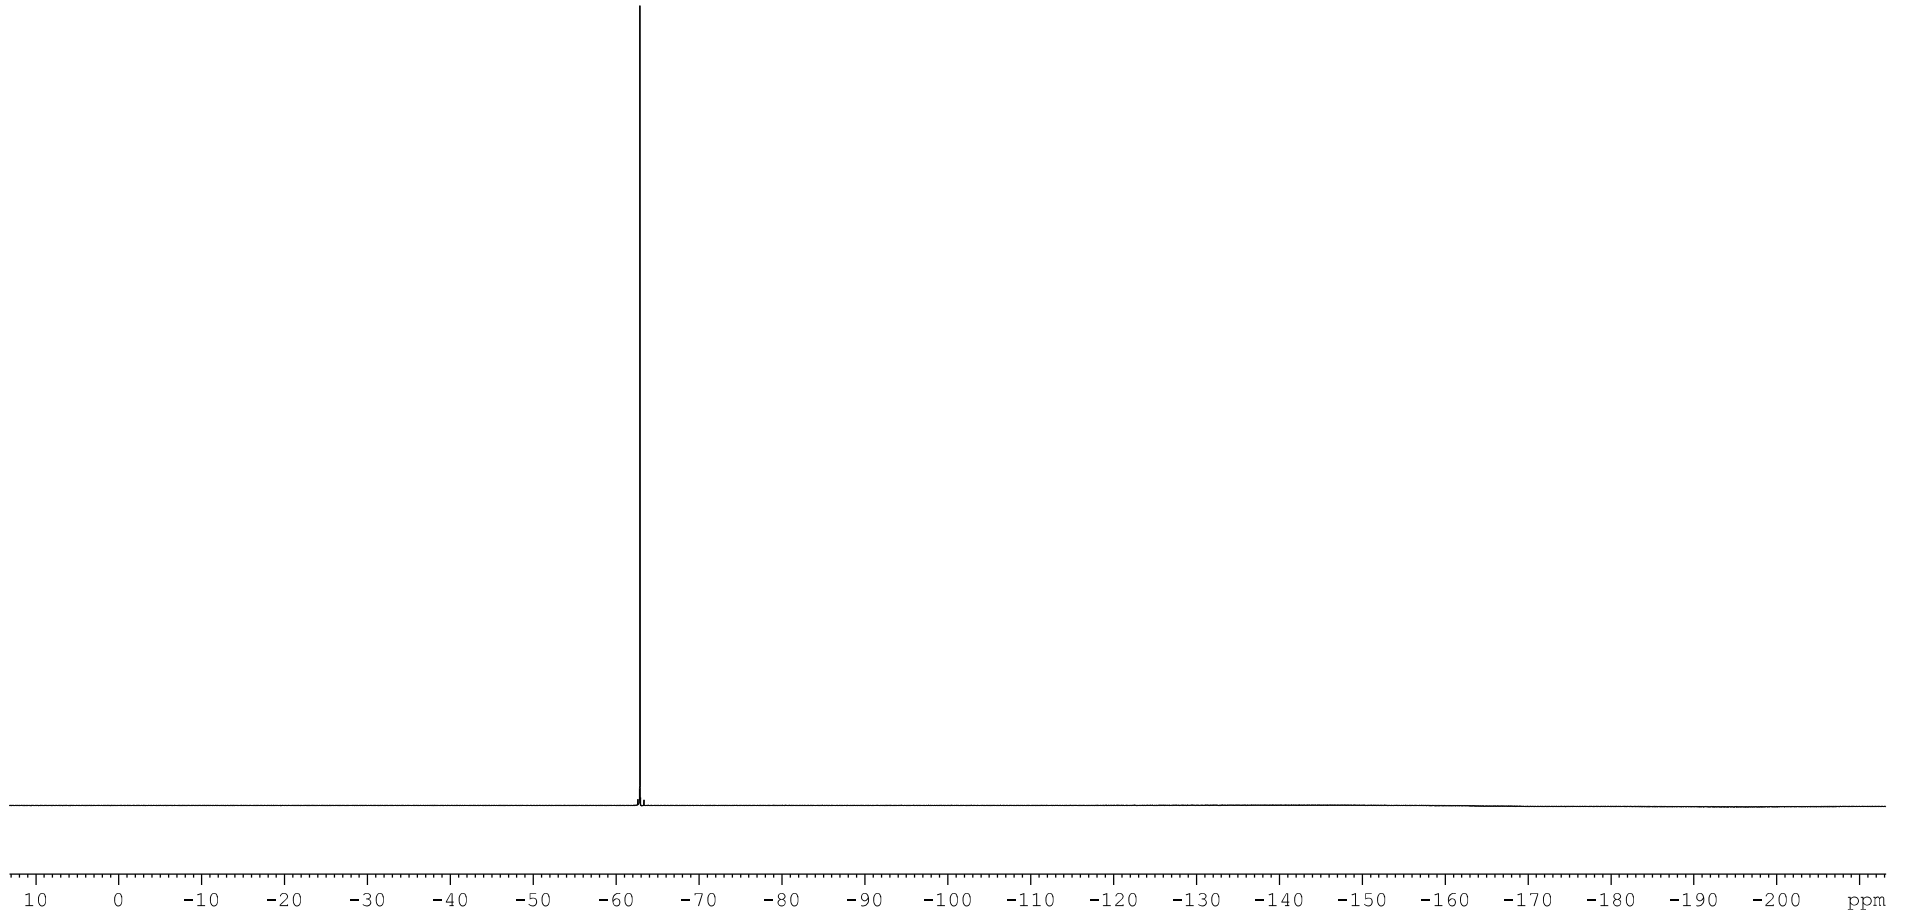



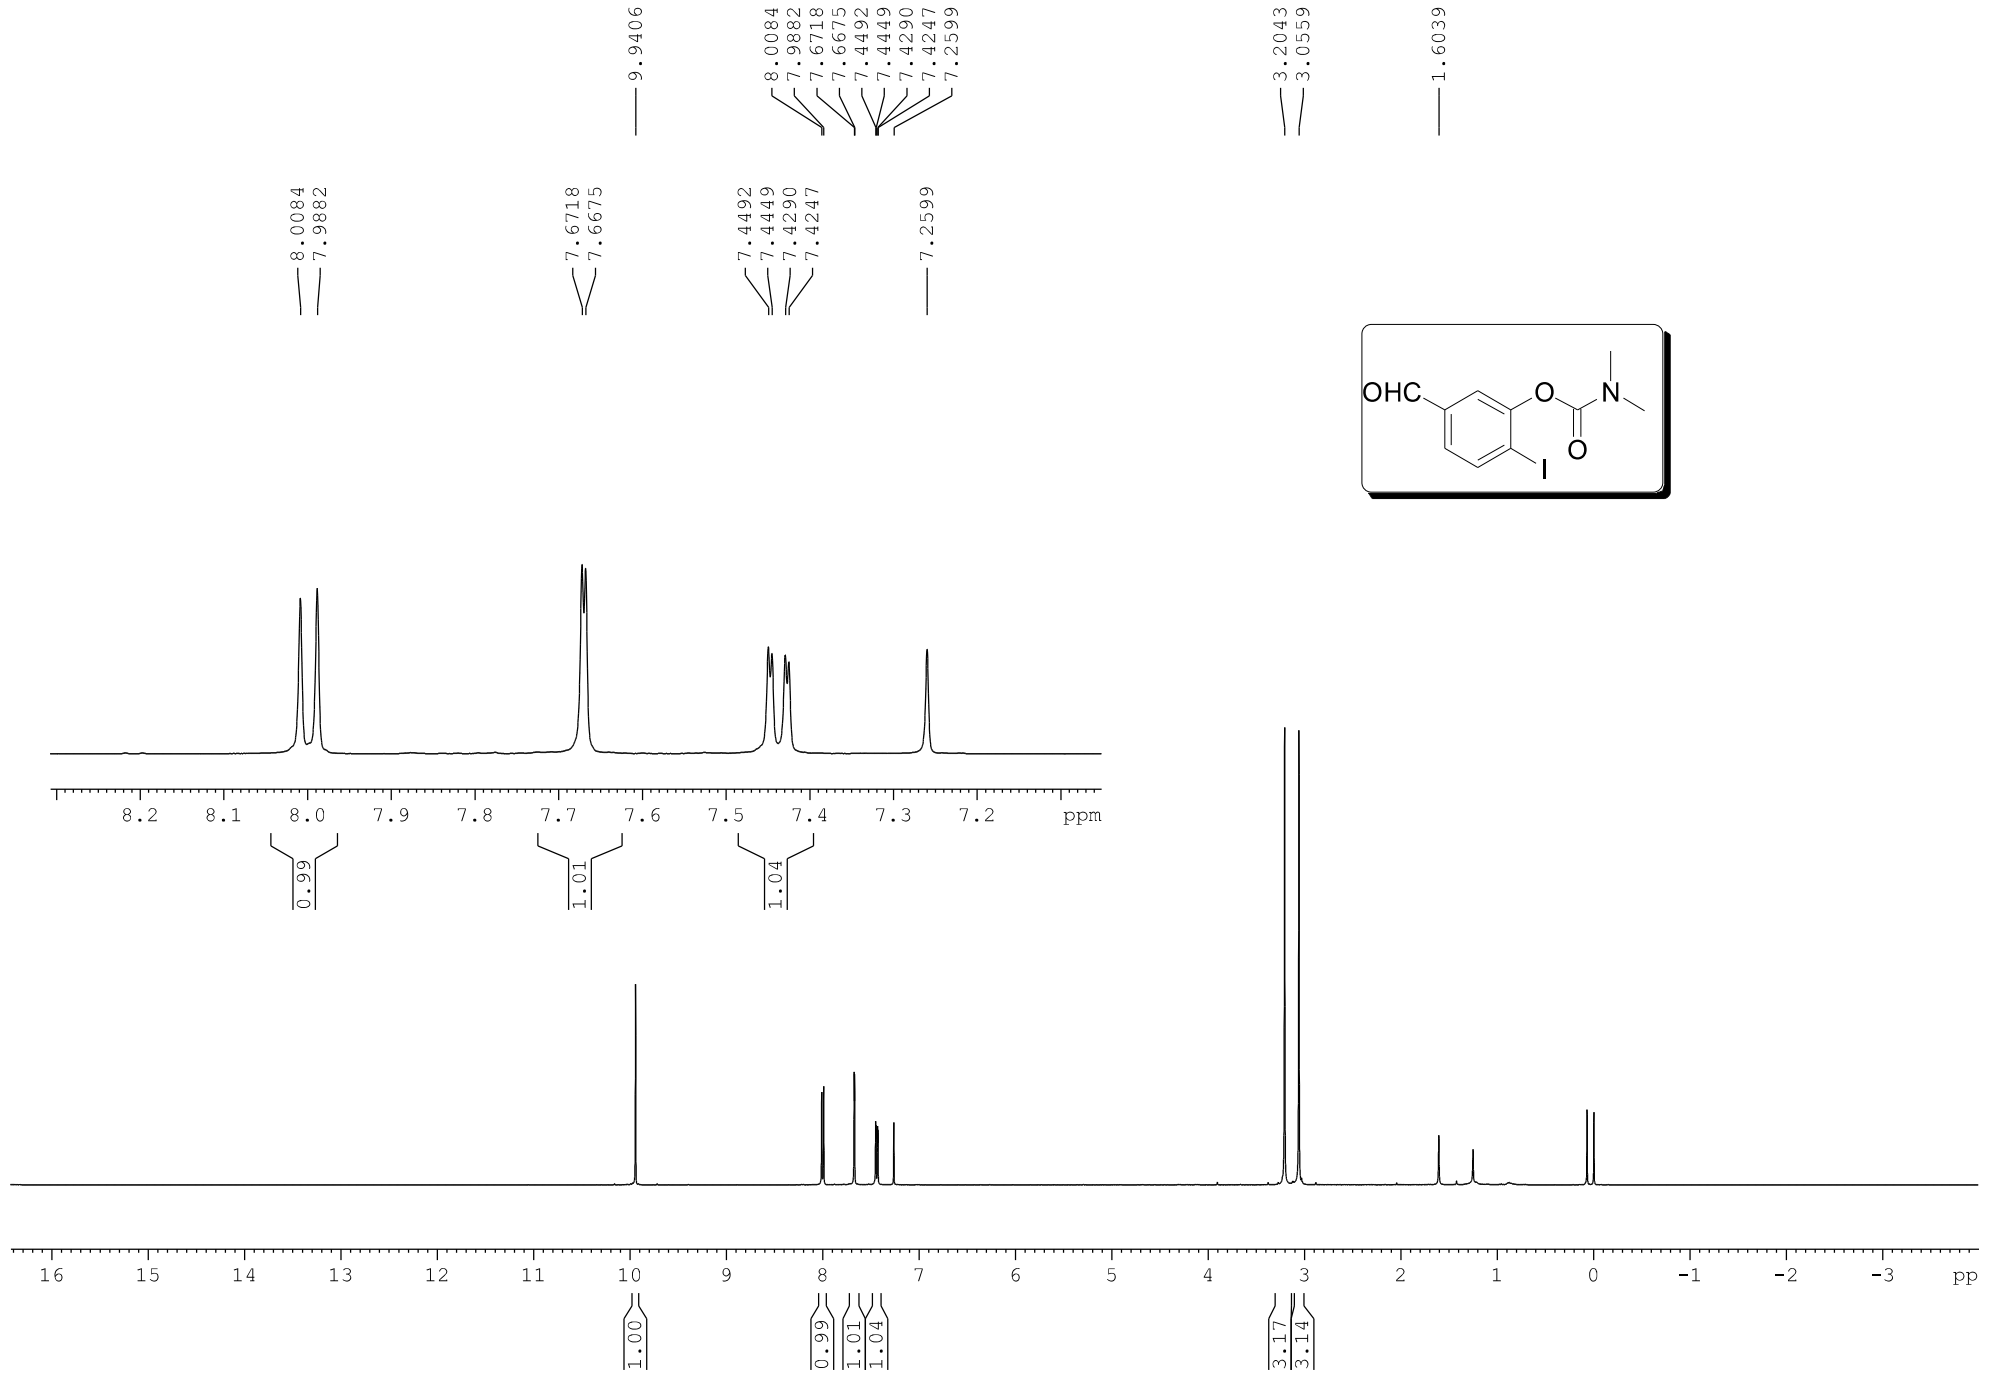

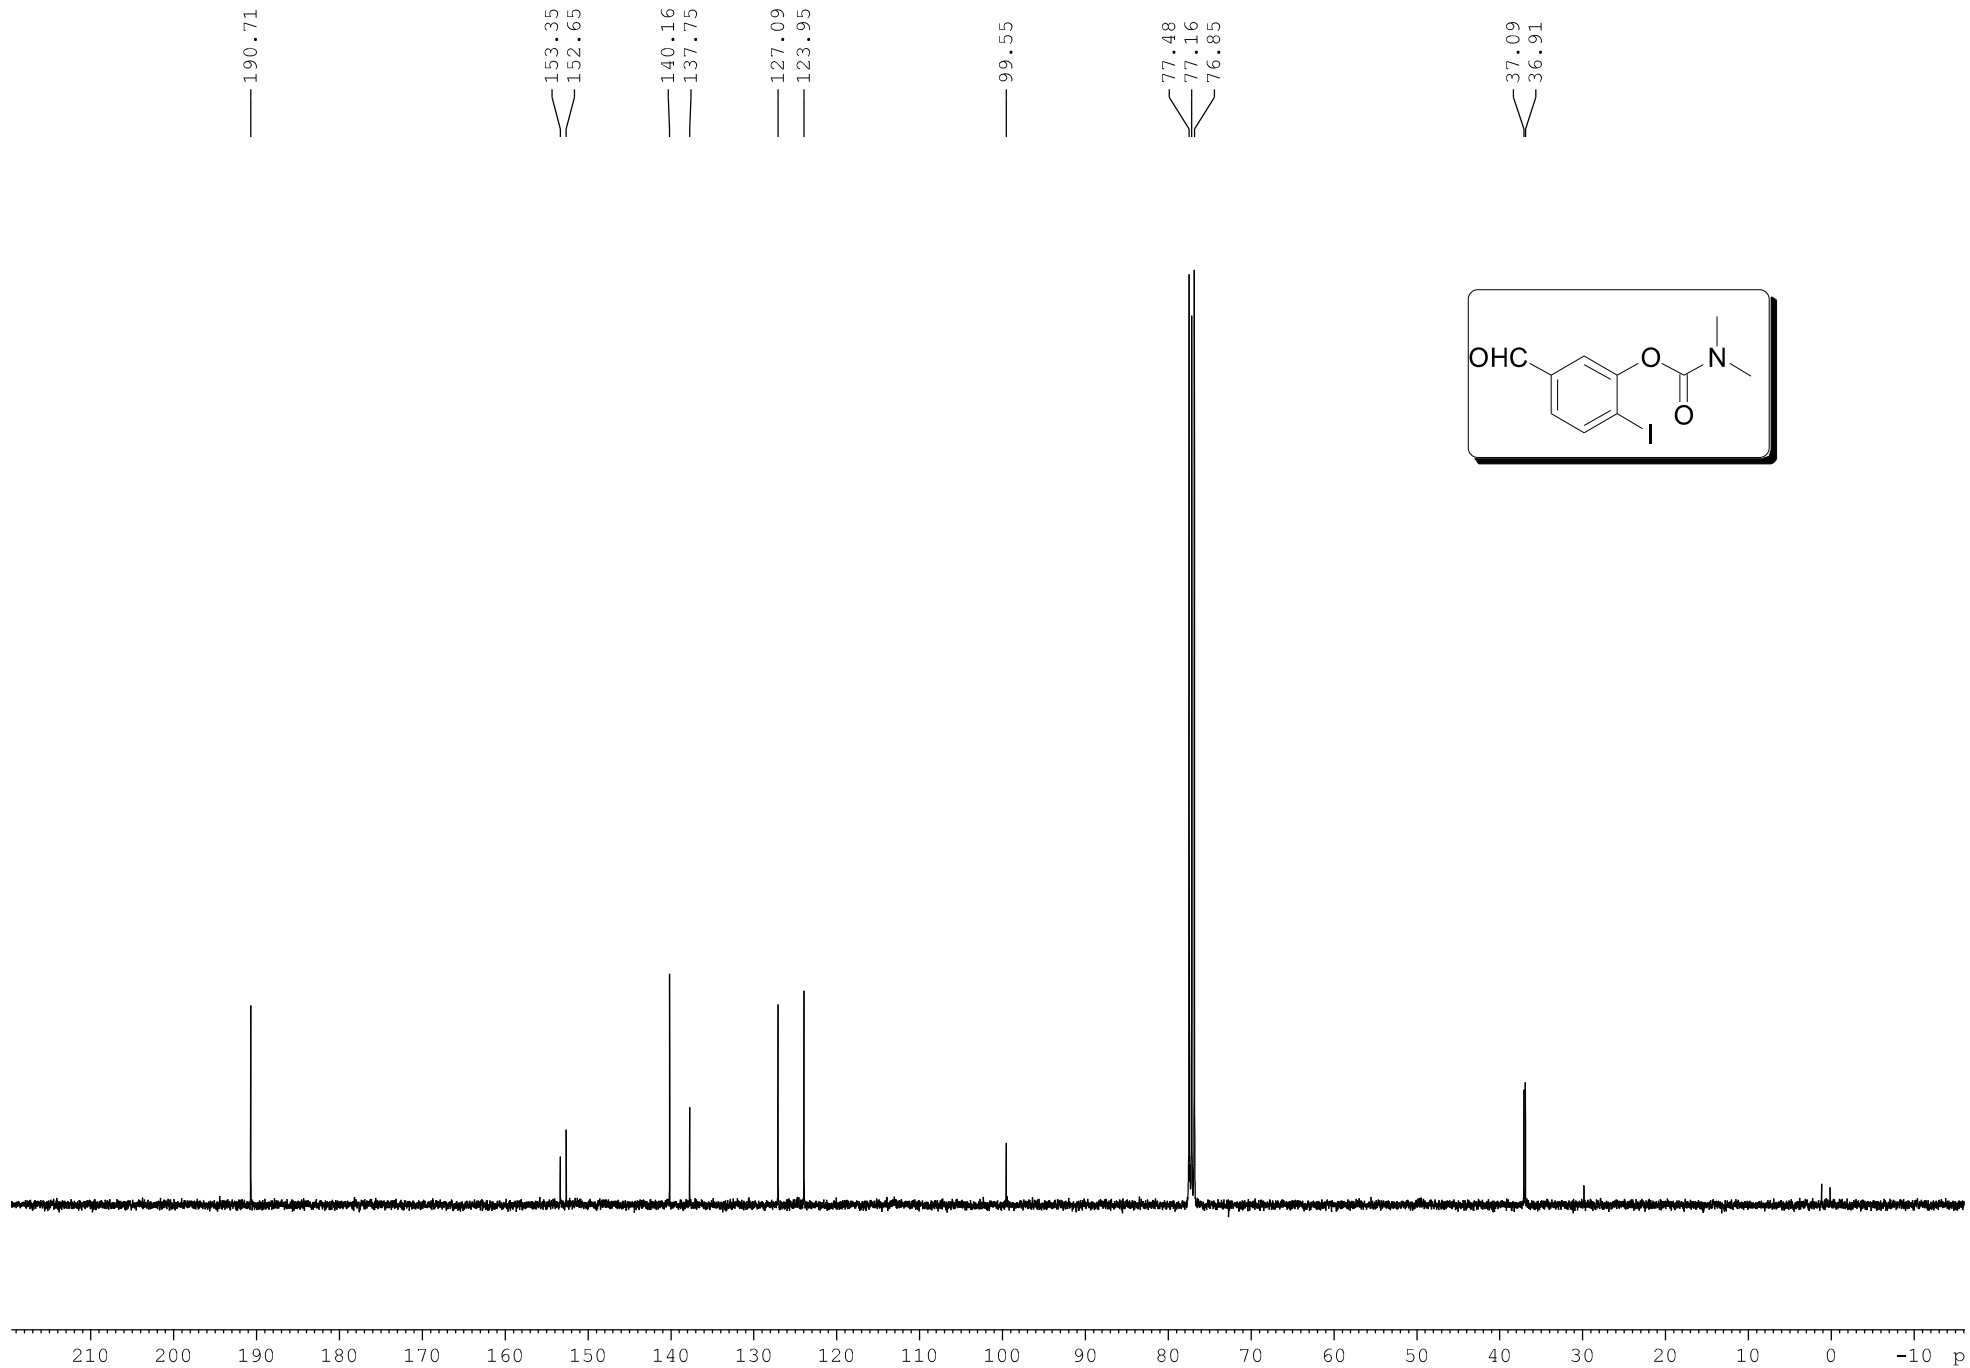

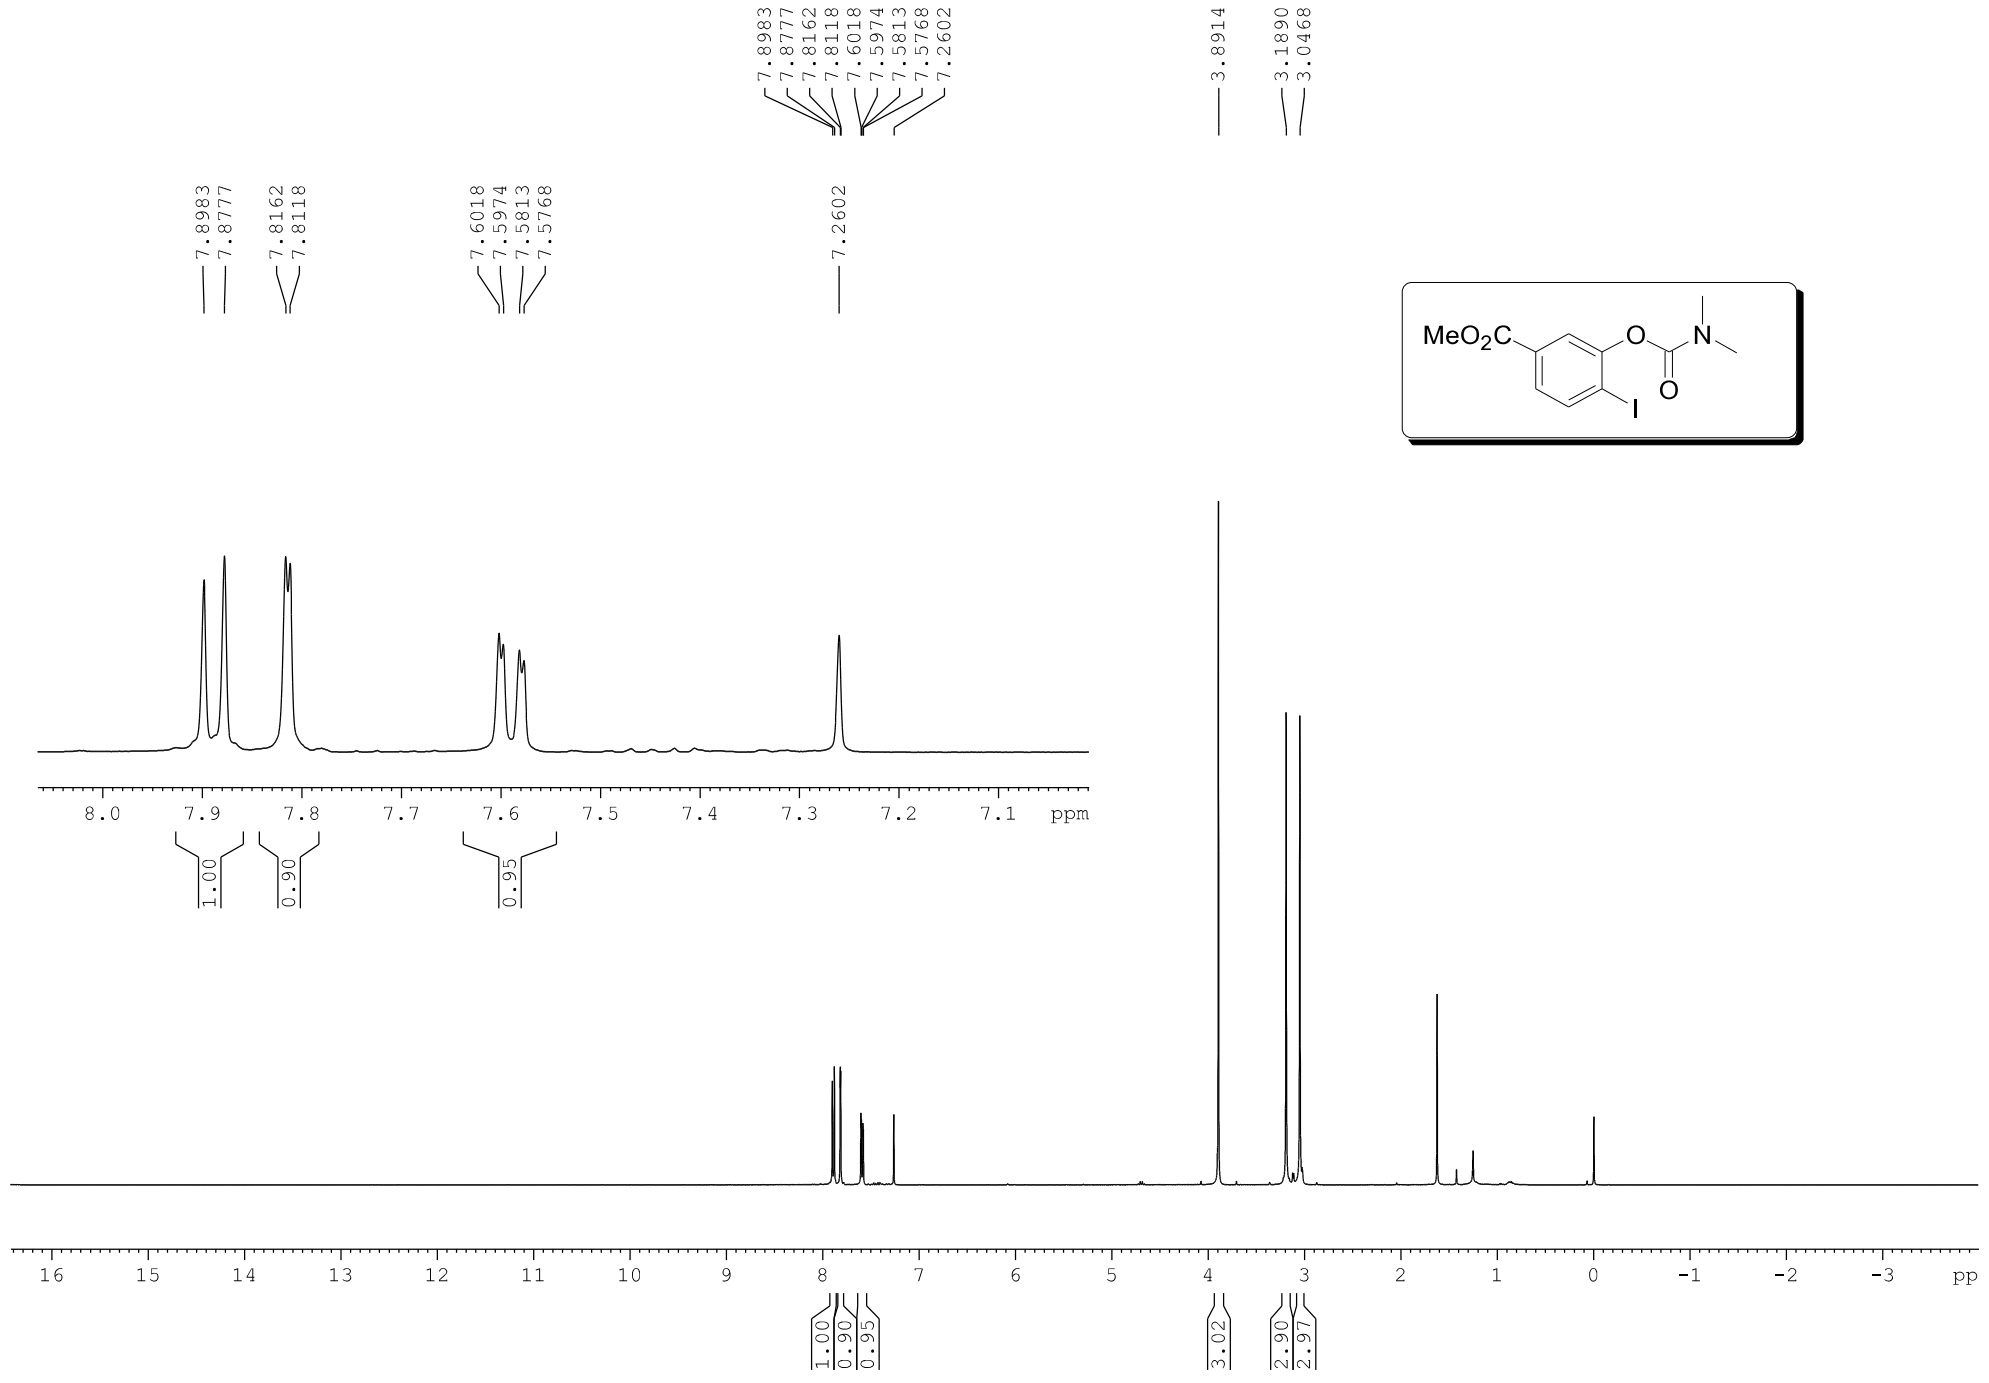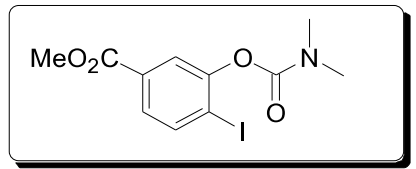

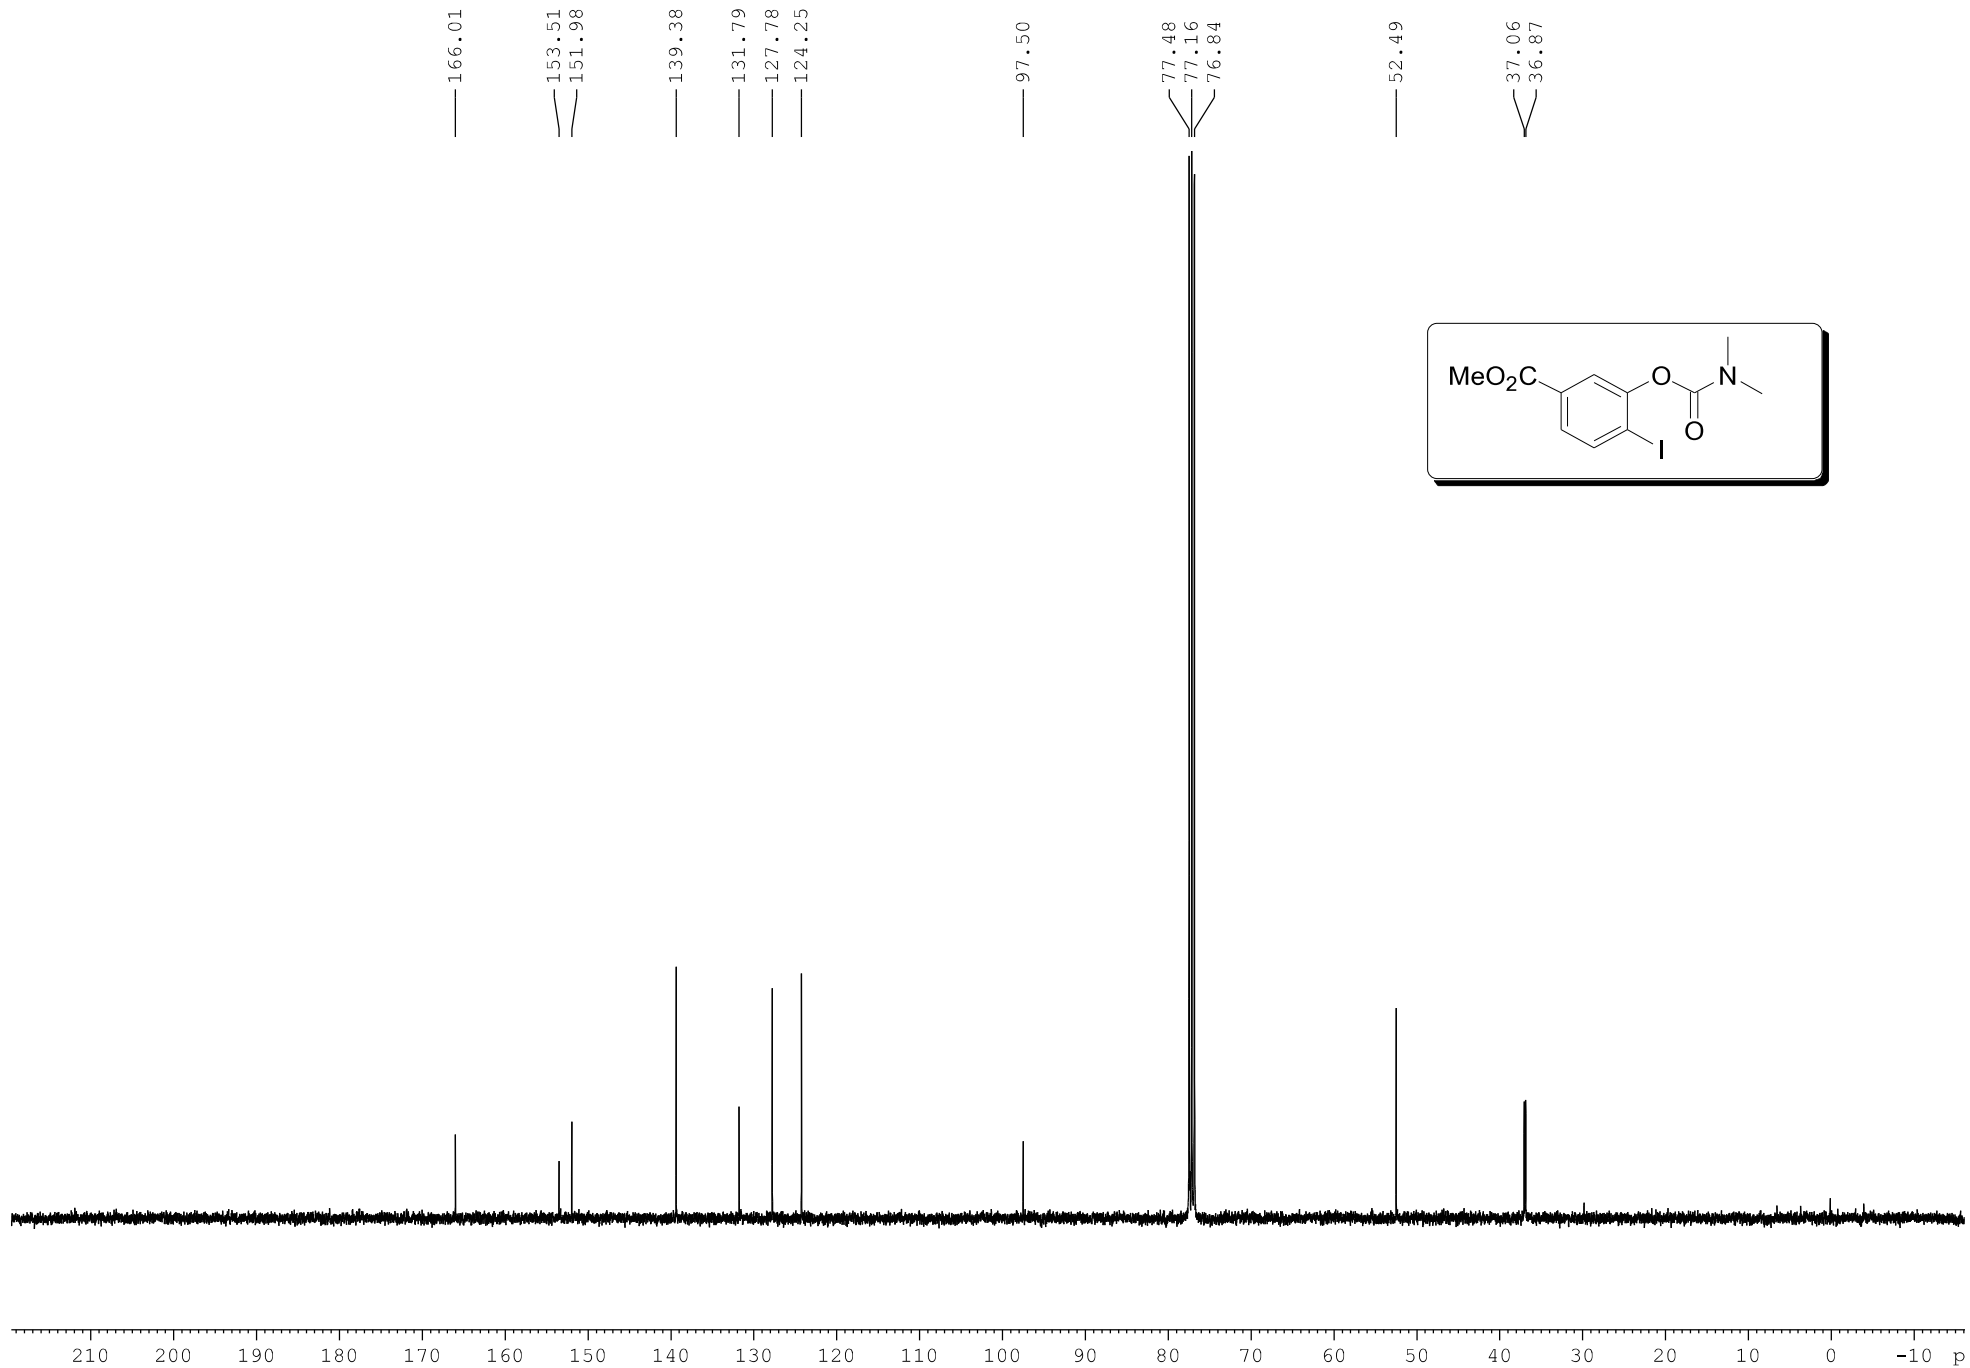

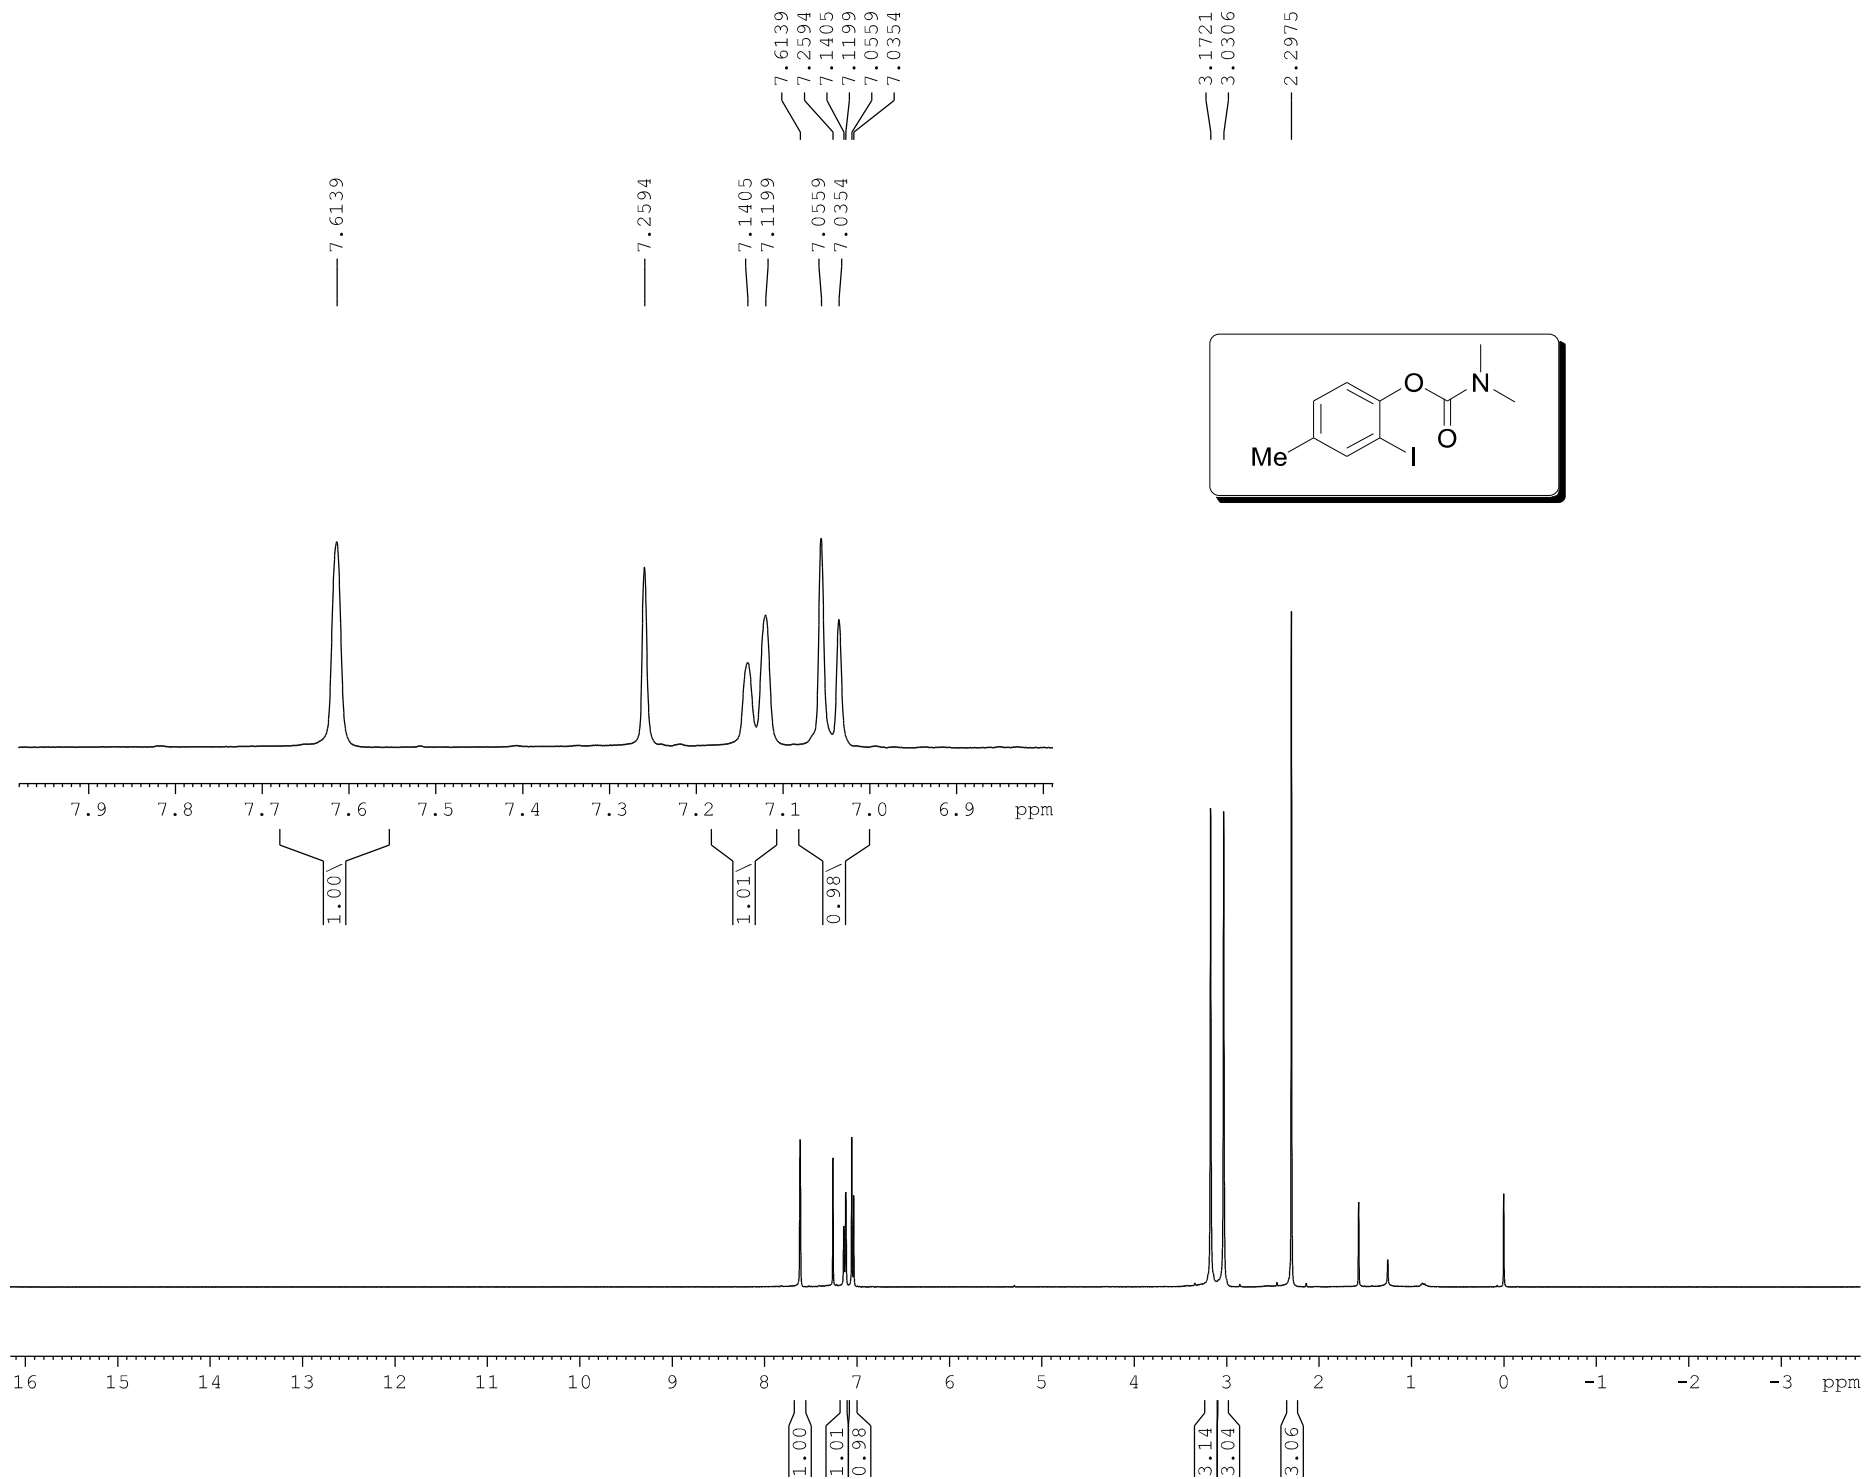

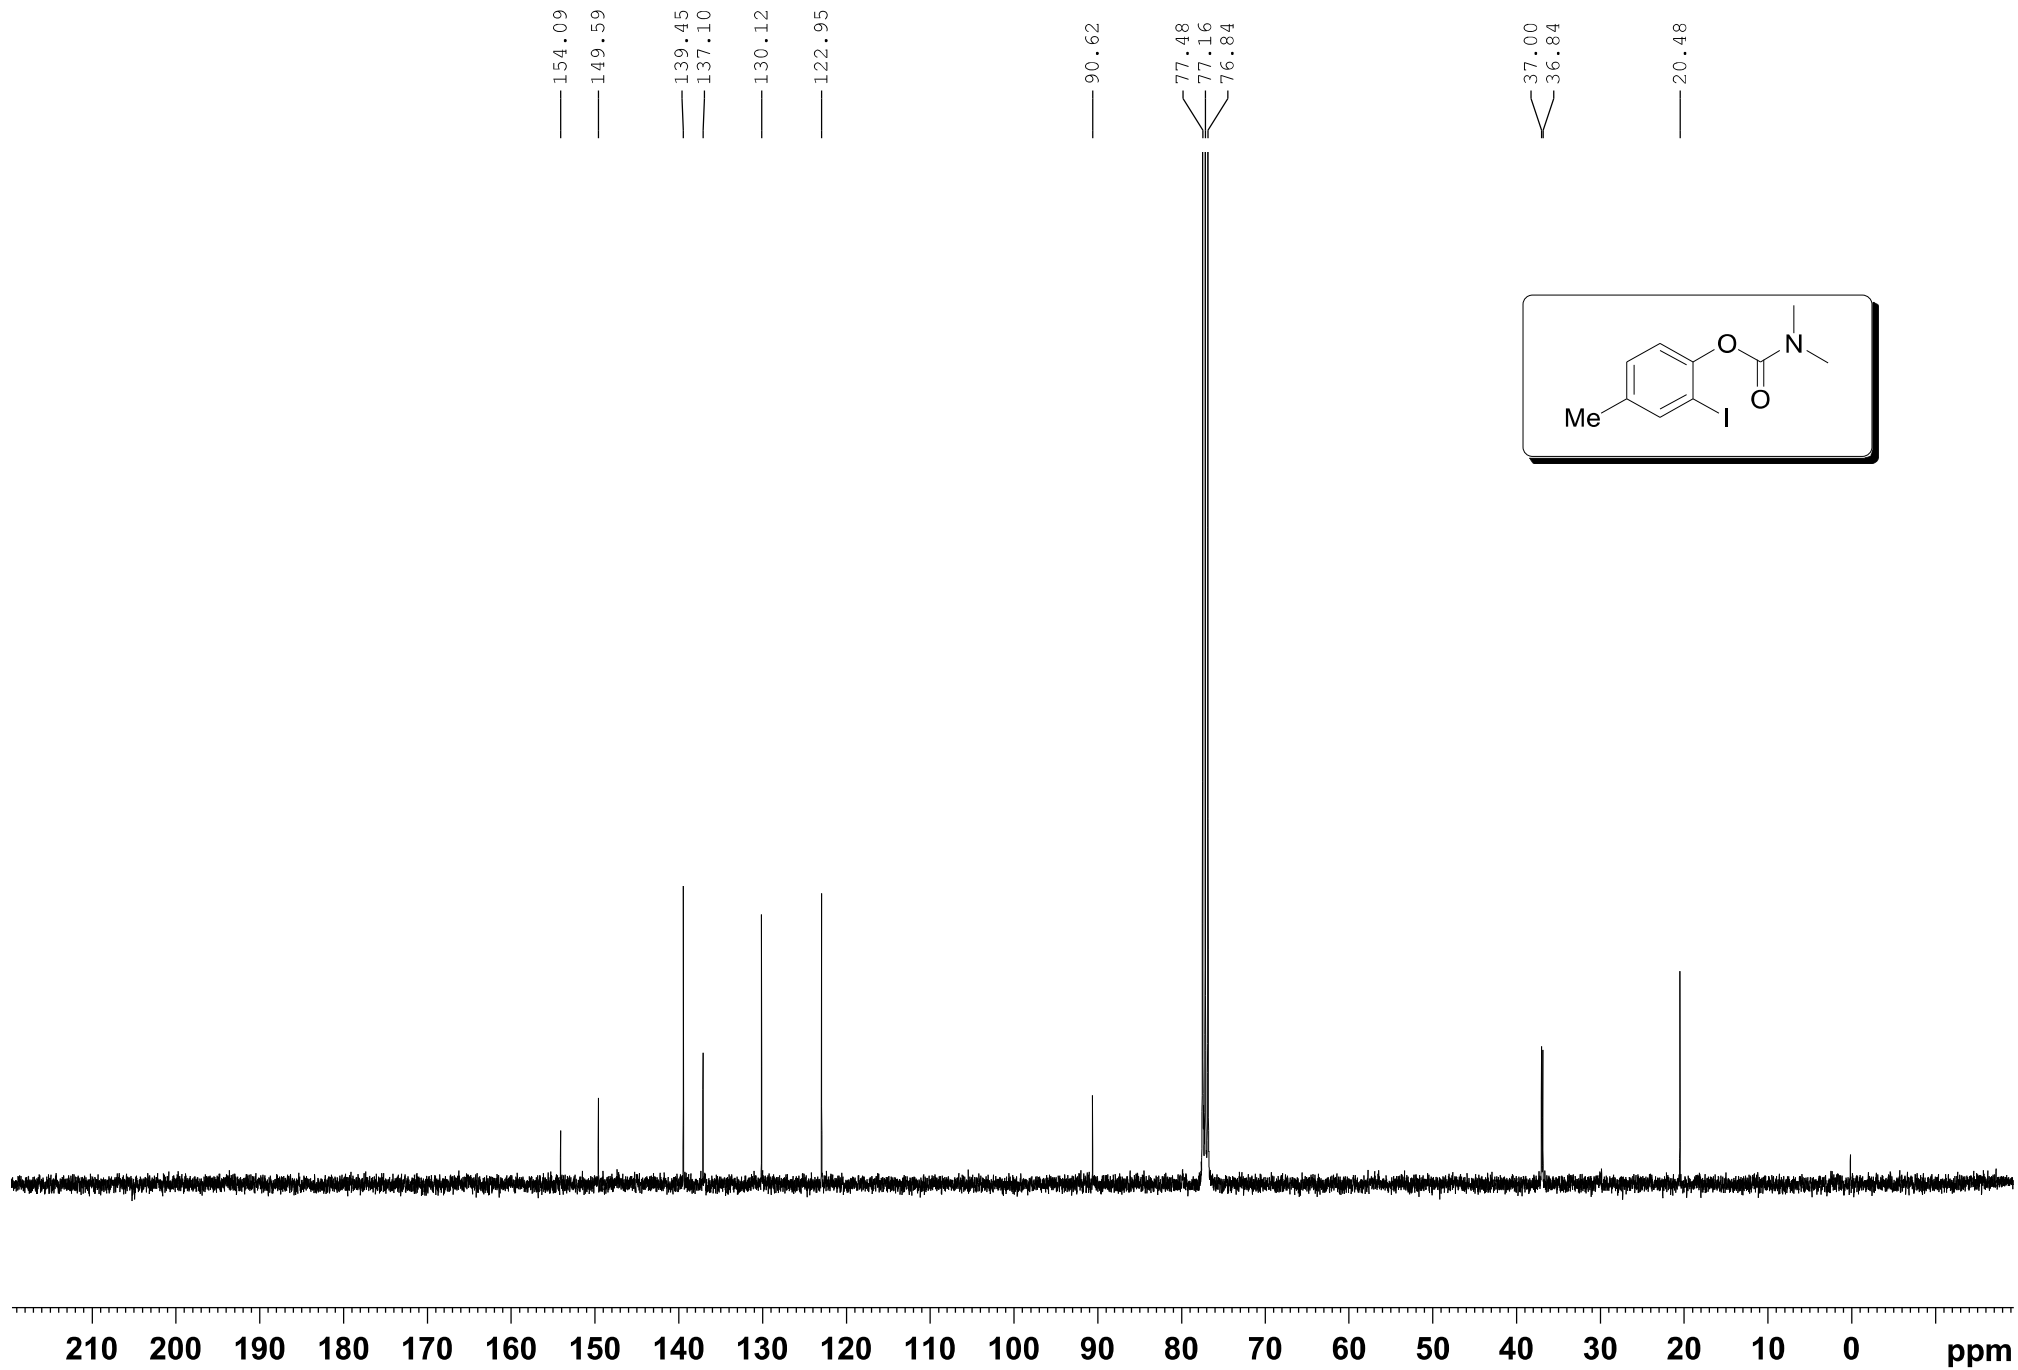

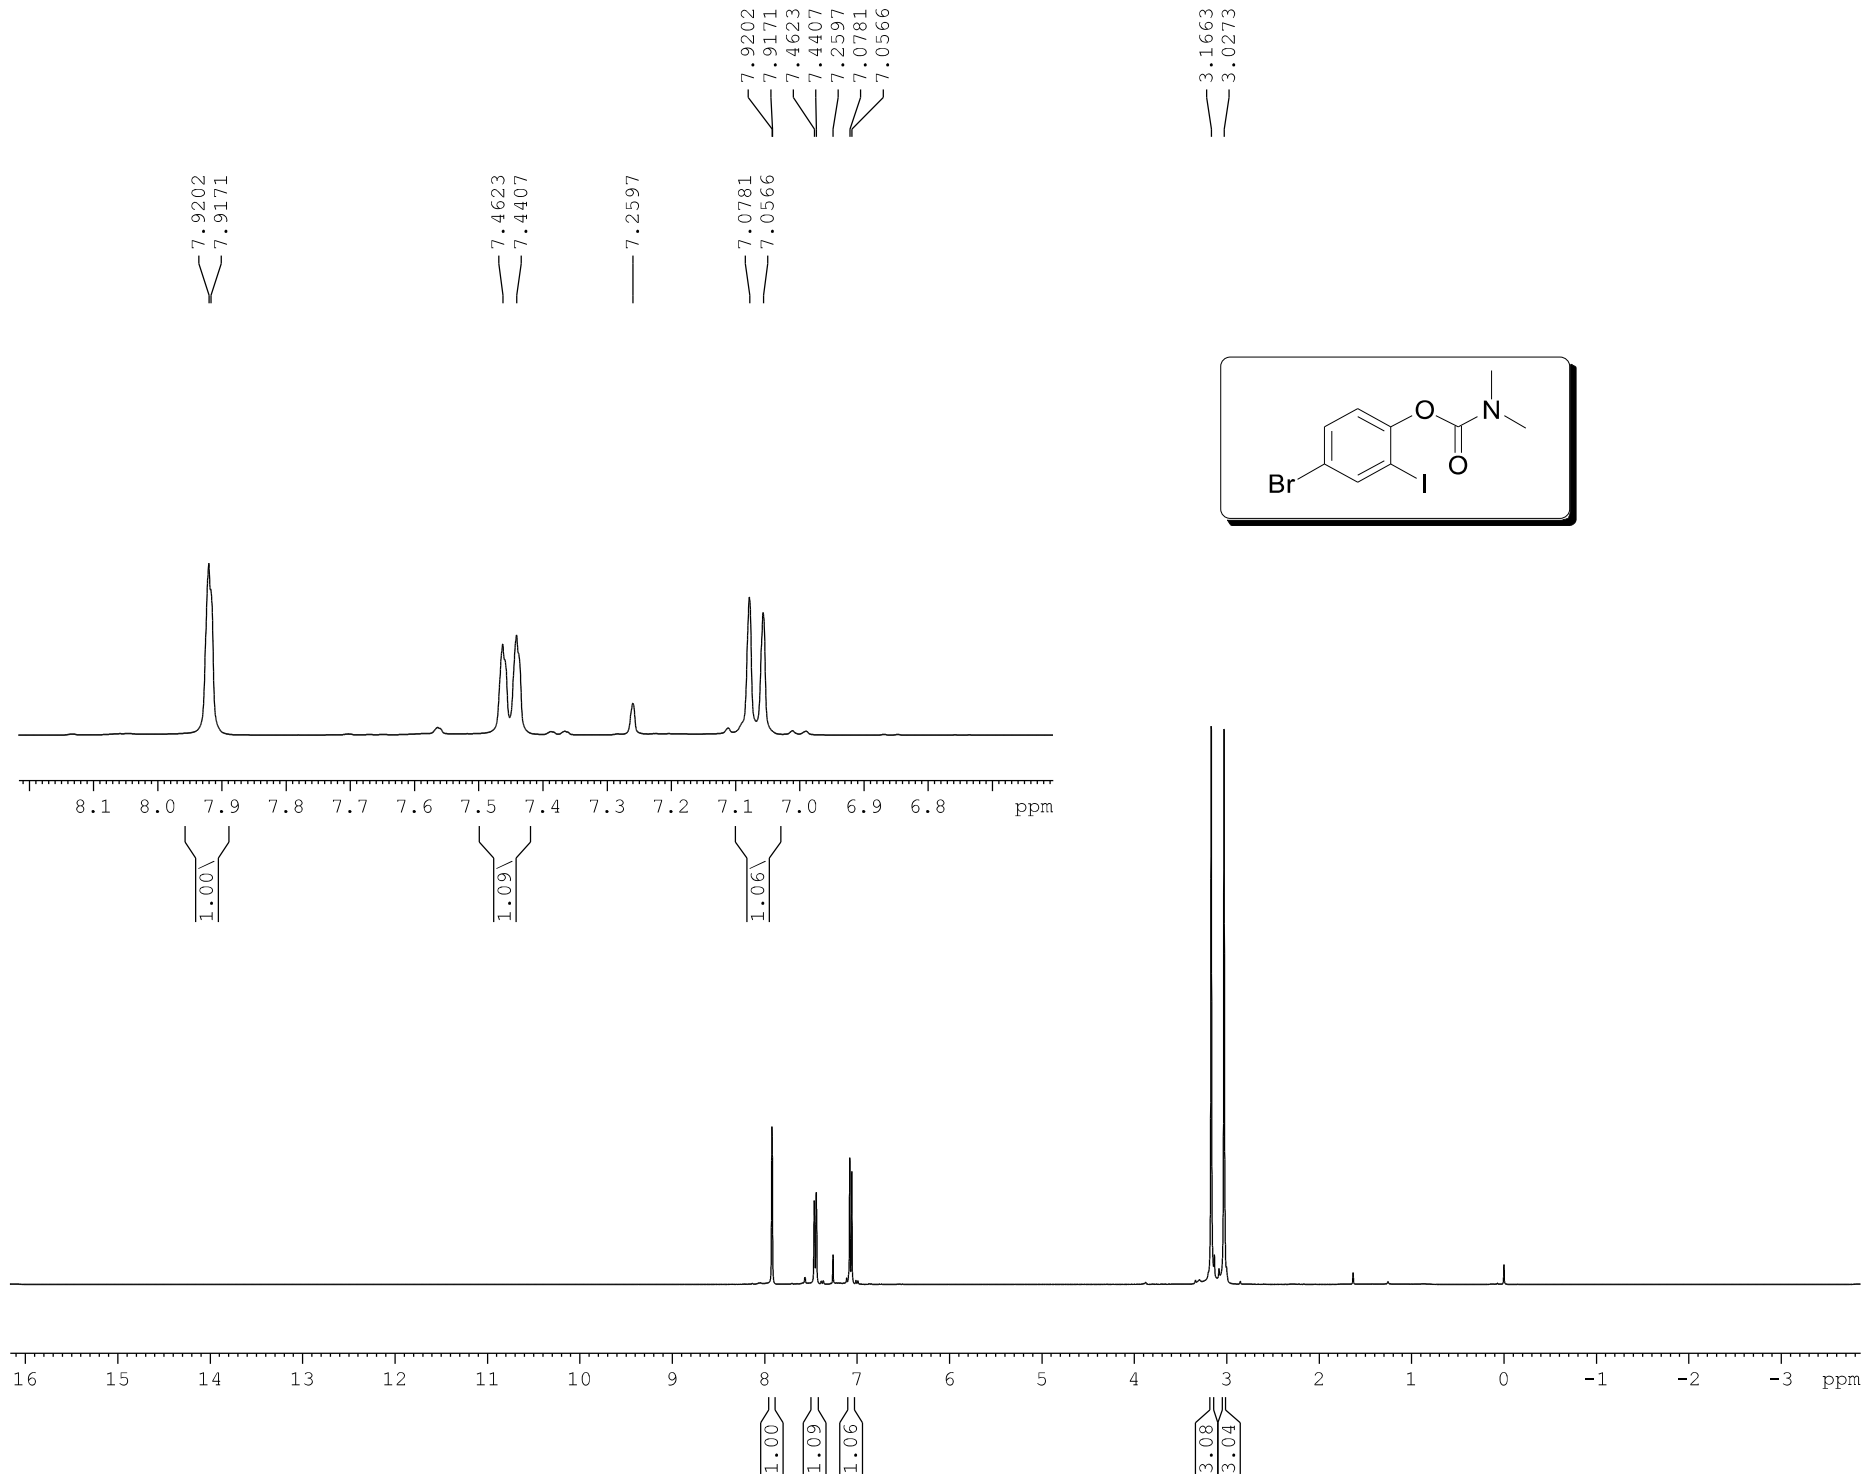

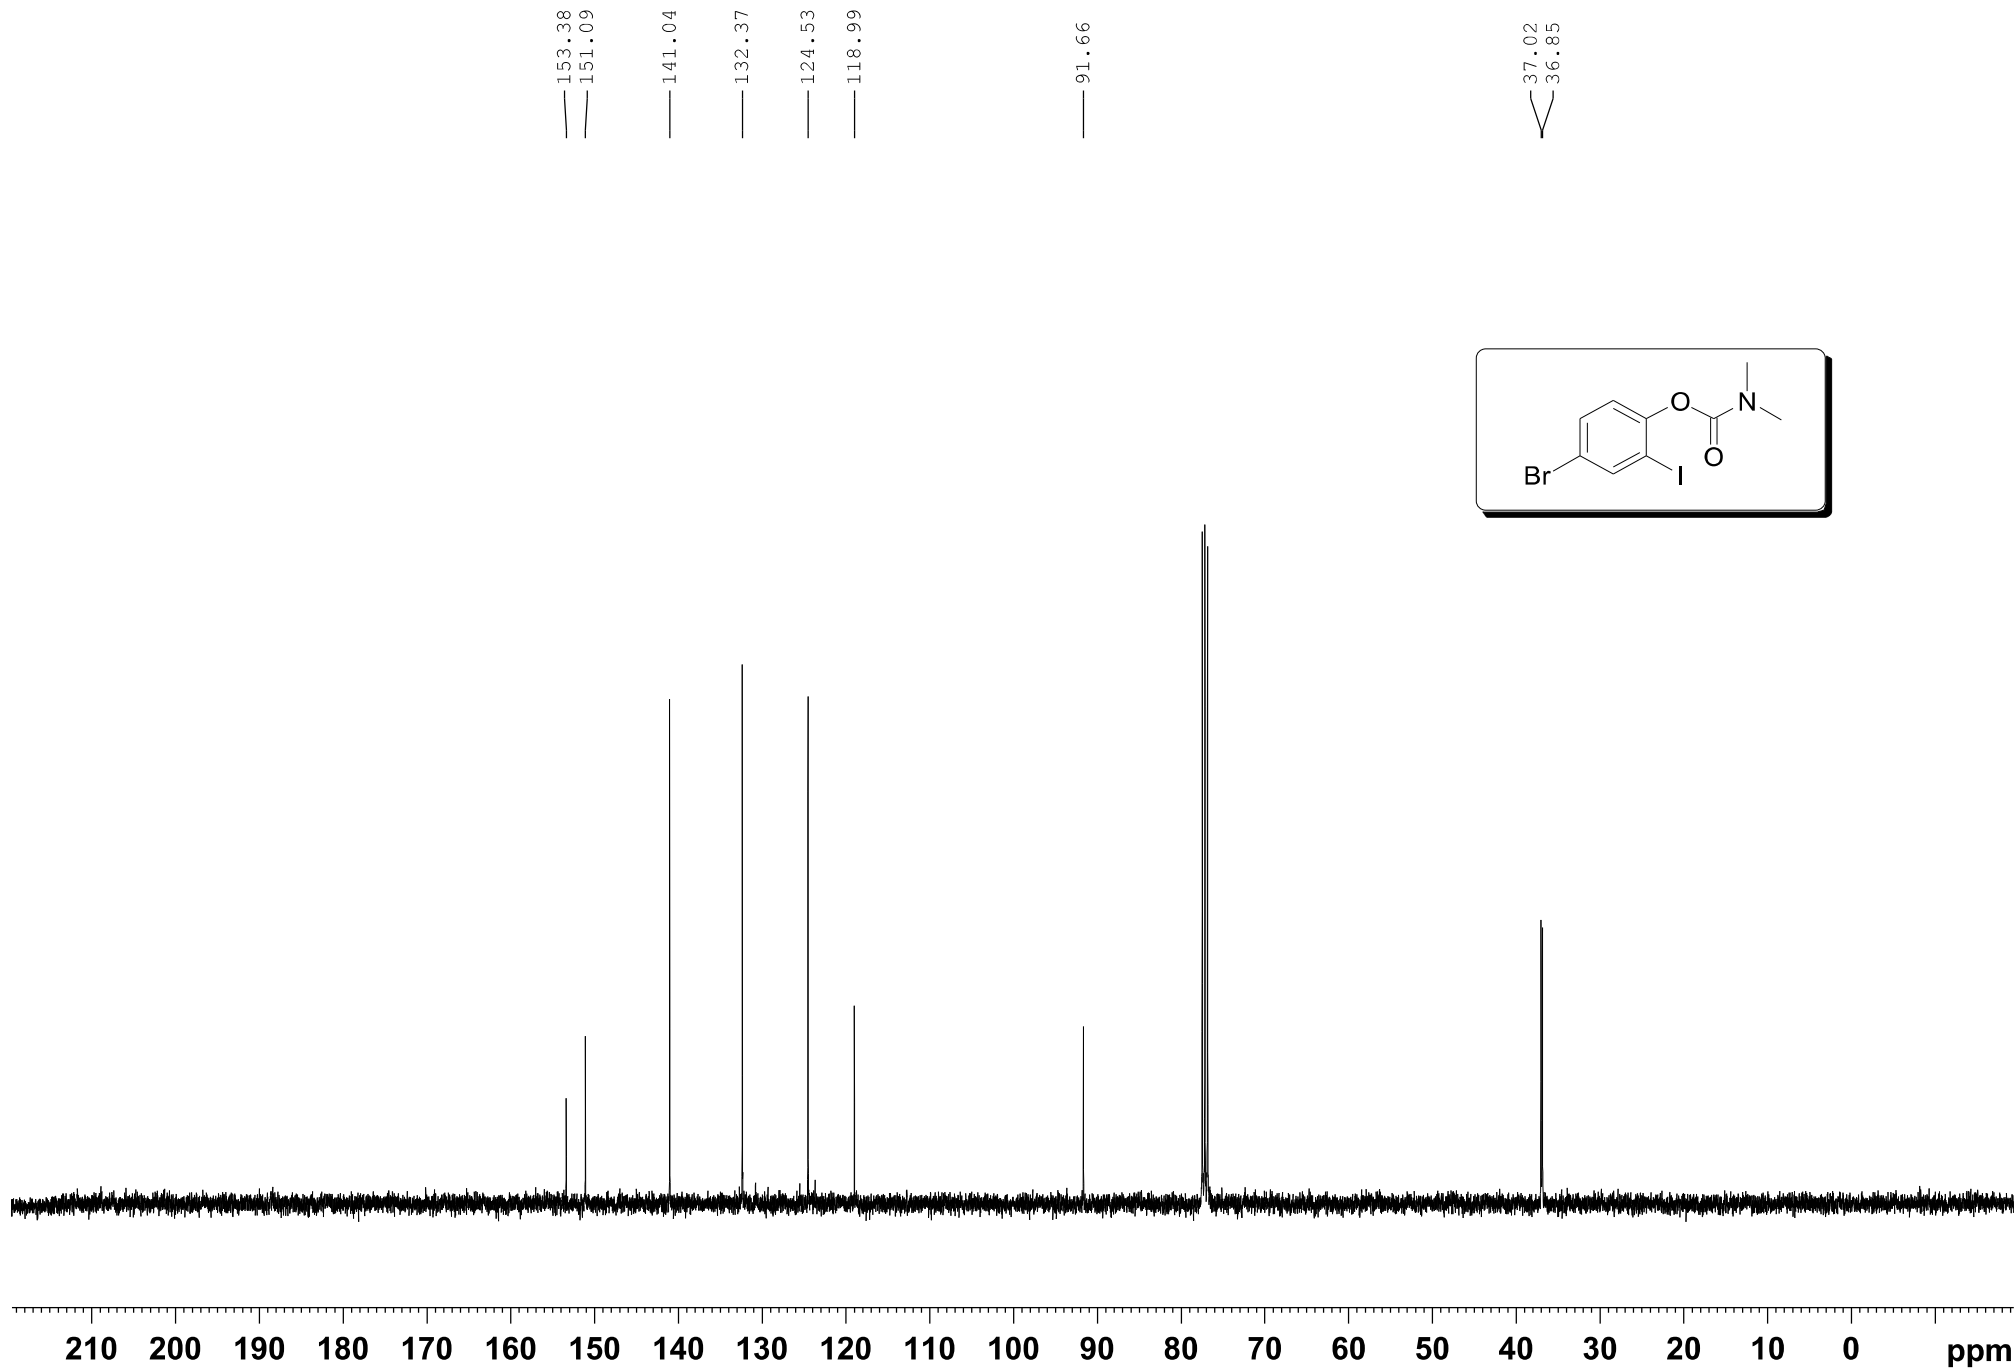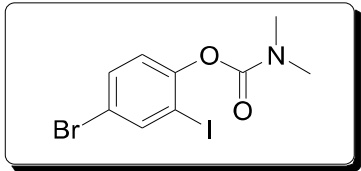



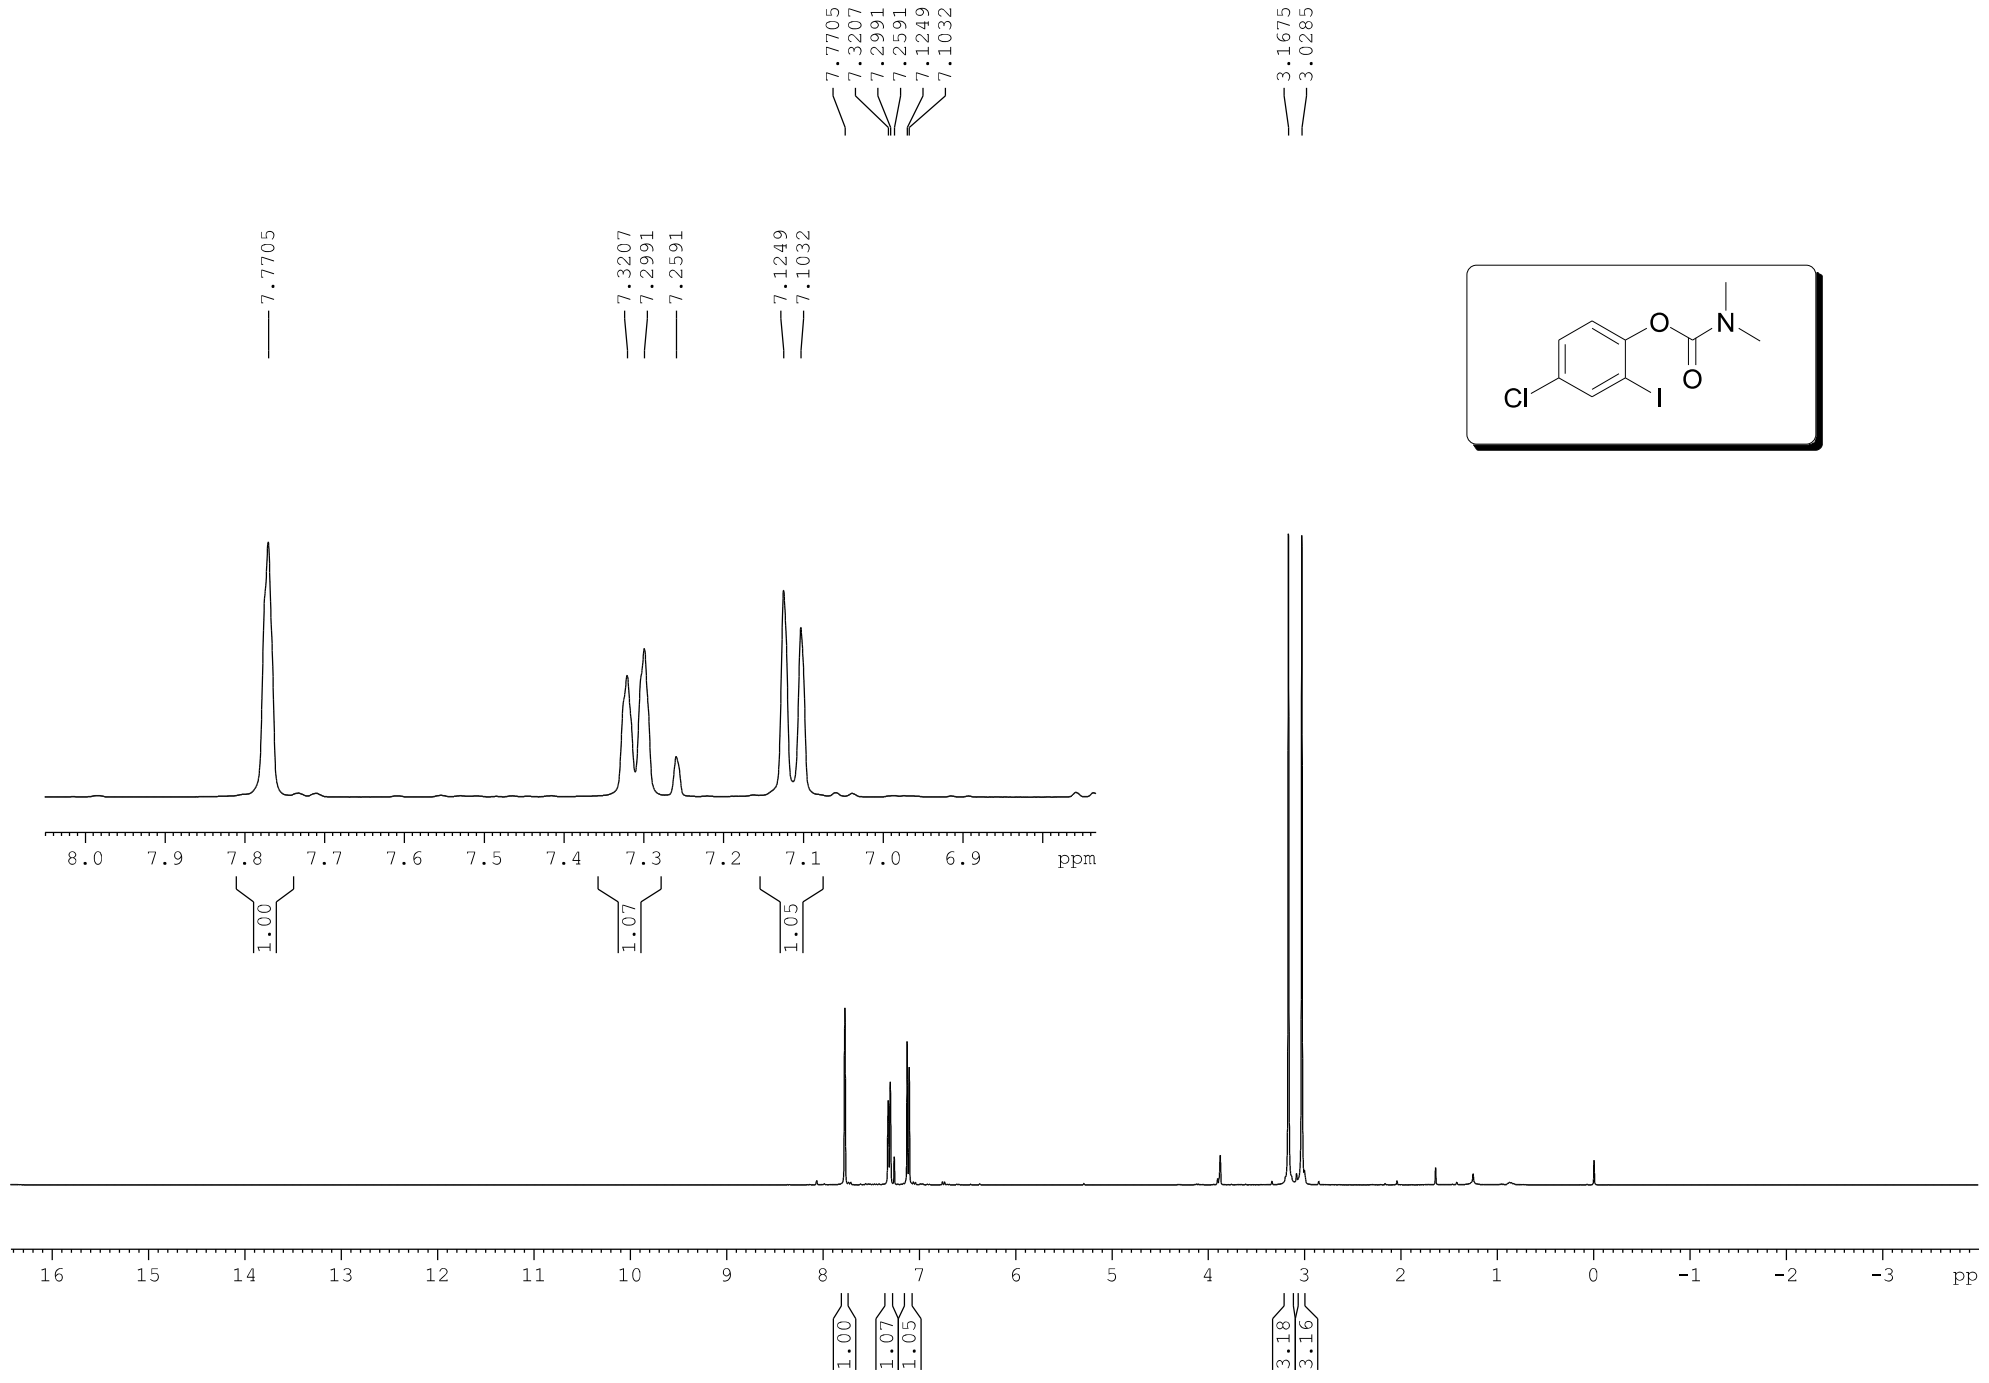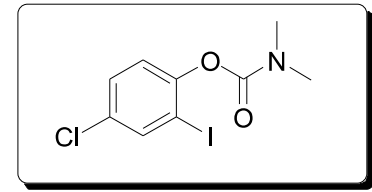

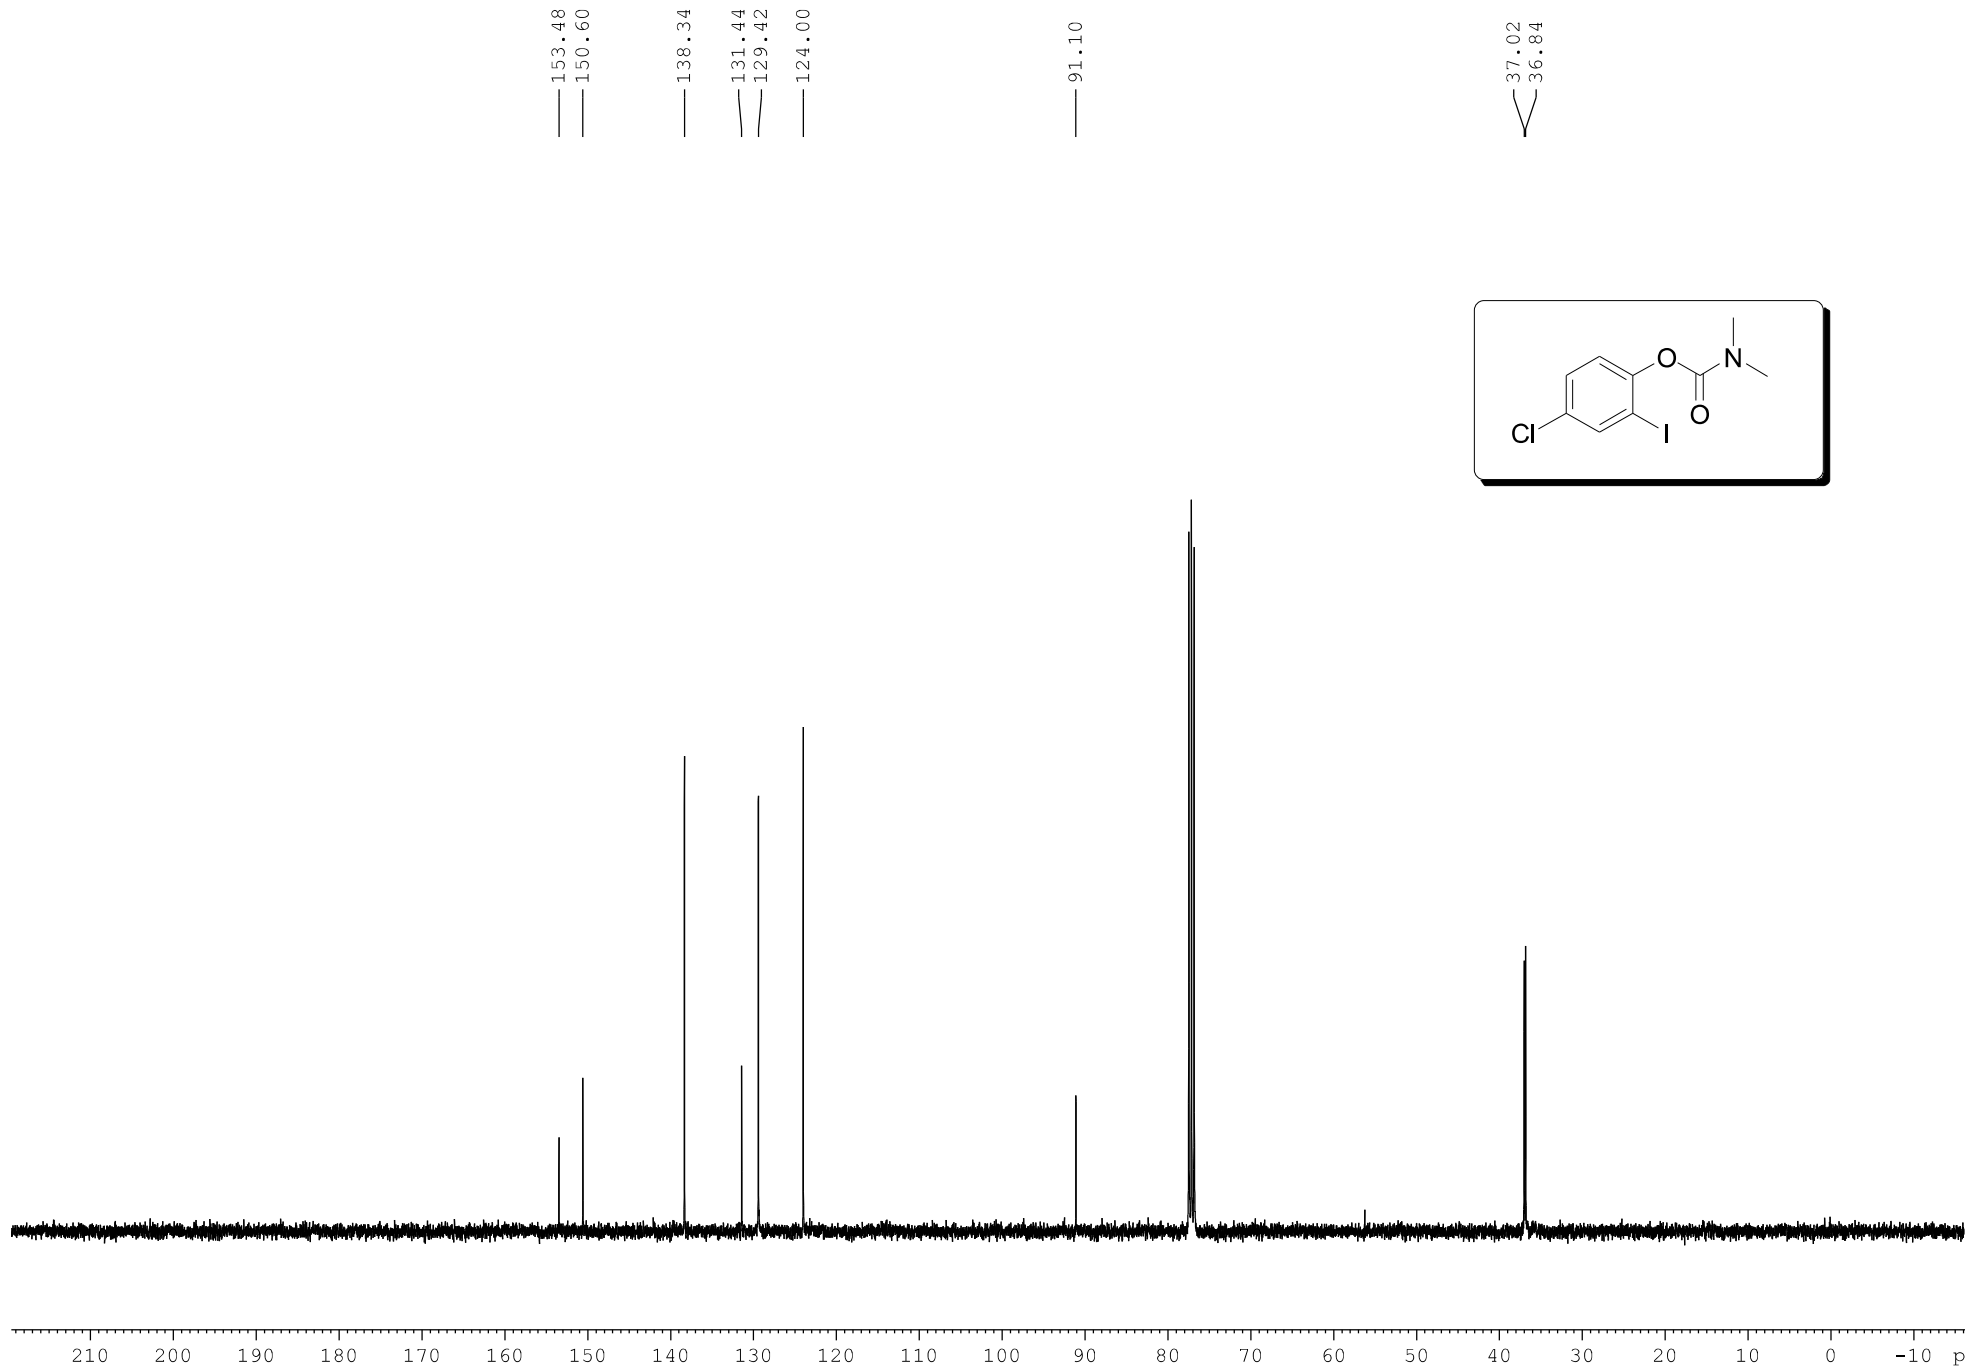

153.48  
150.60

138.34

131.44  
129.42

124.00

91.10

37.02  
36.84

210 200 190 180 170 160 150 140 130 120 110 100 90 80 70 60 50 40 30 20 10 0 -10 p

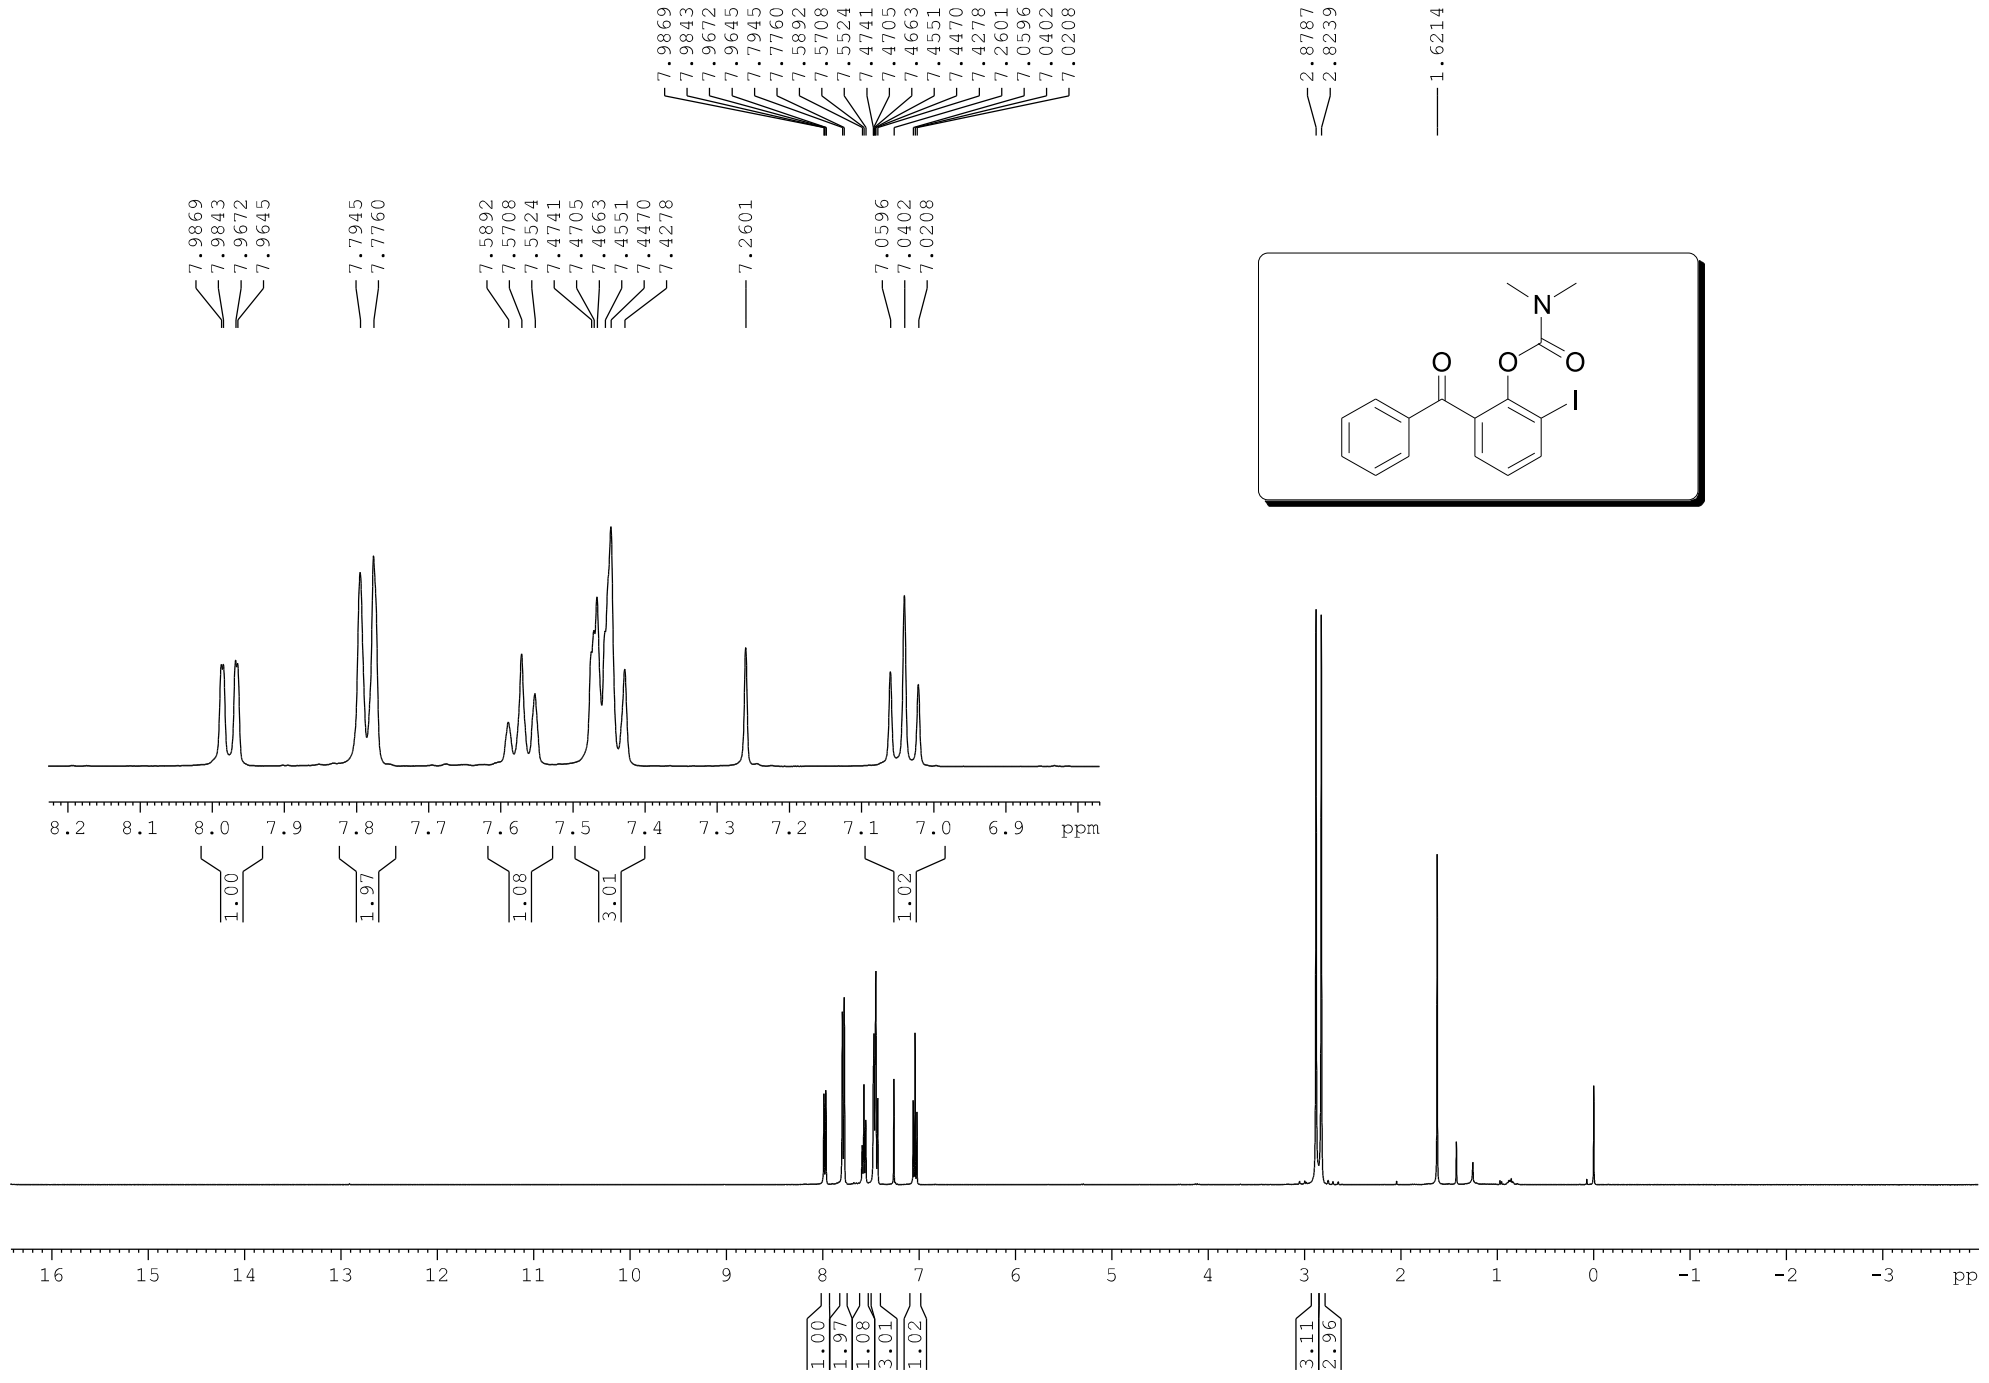

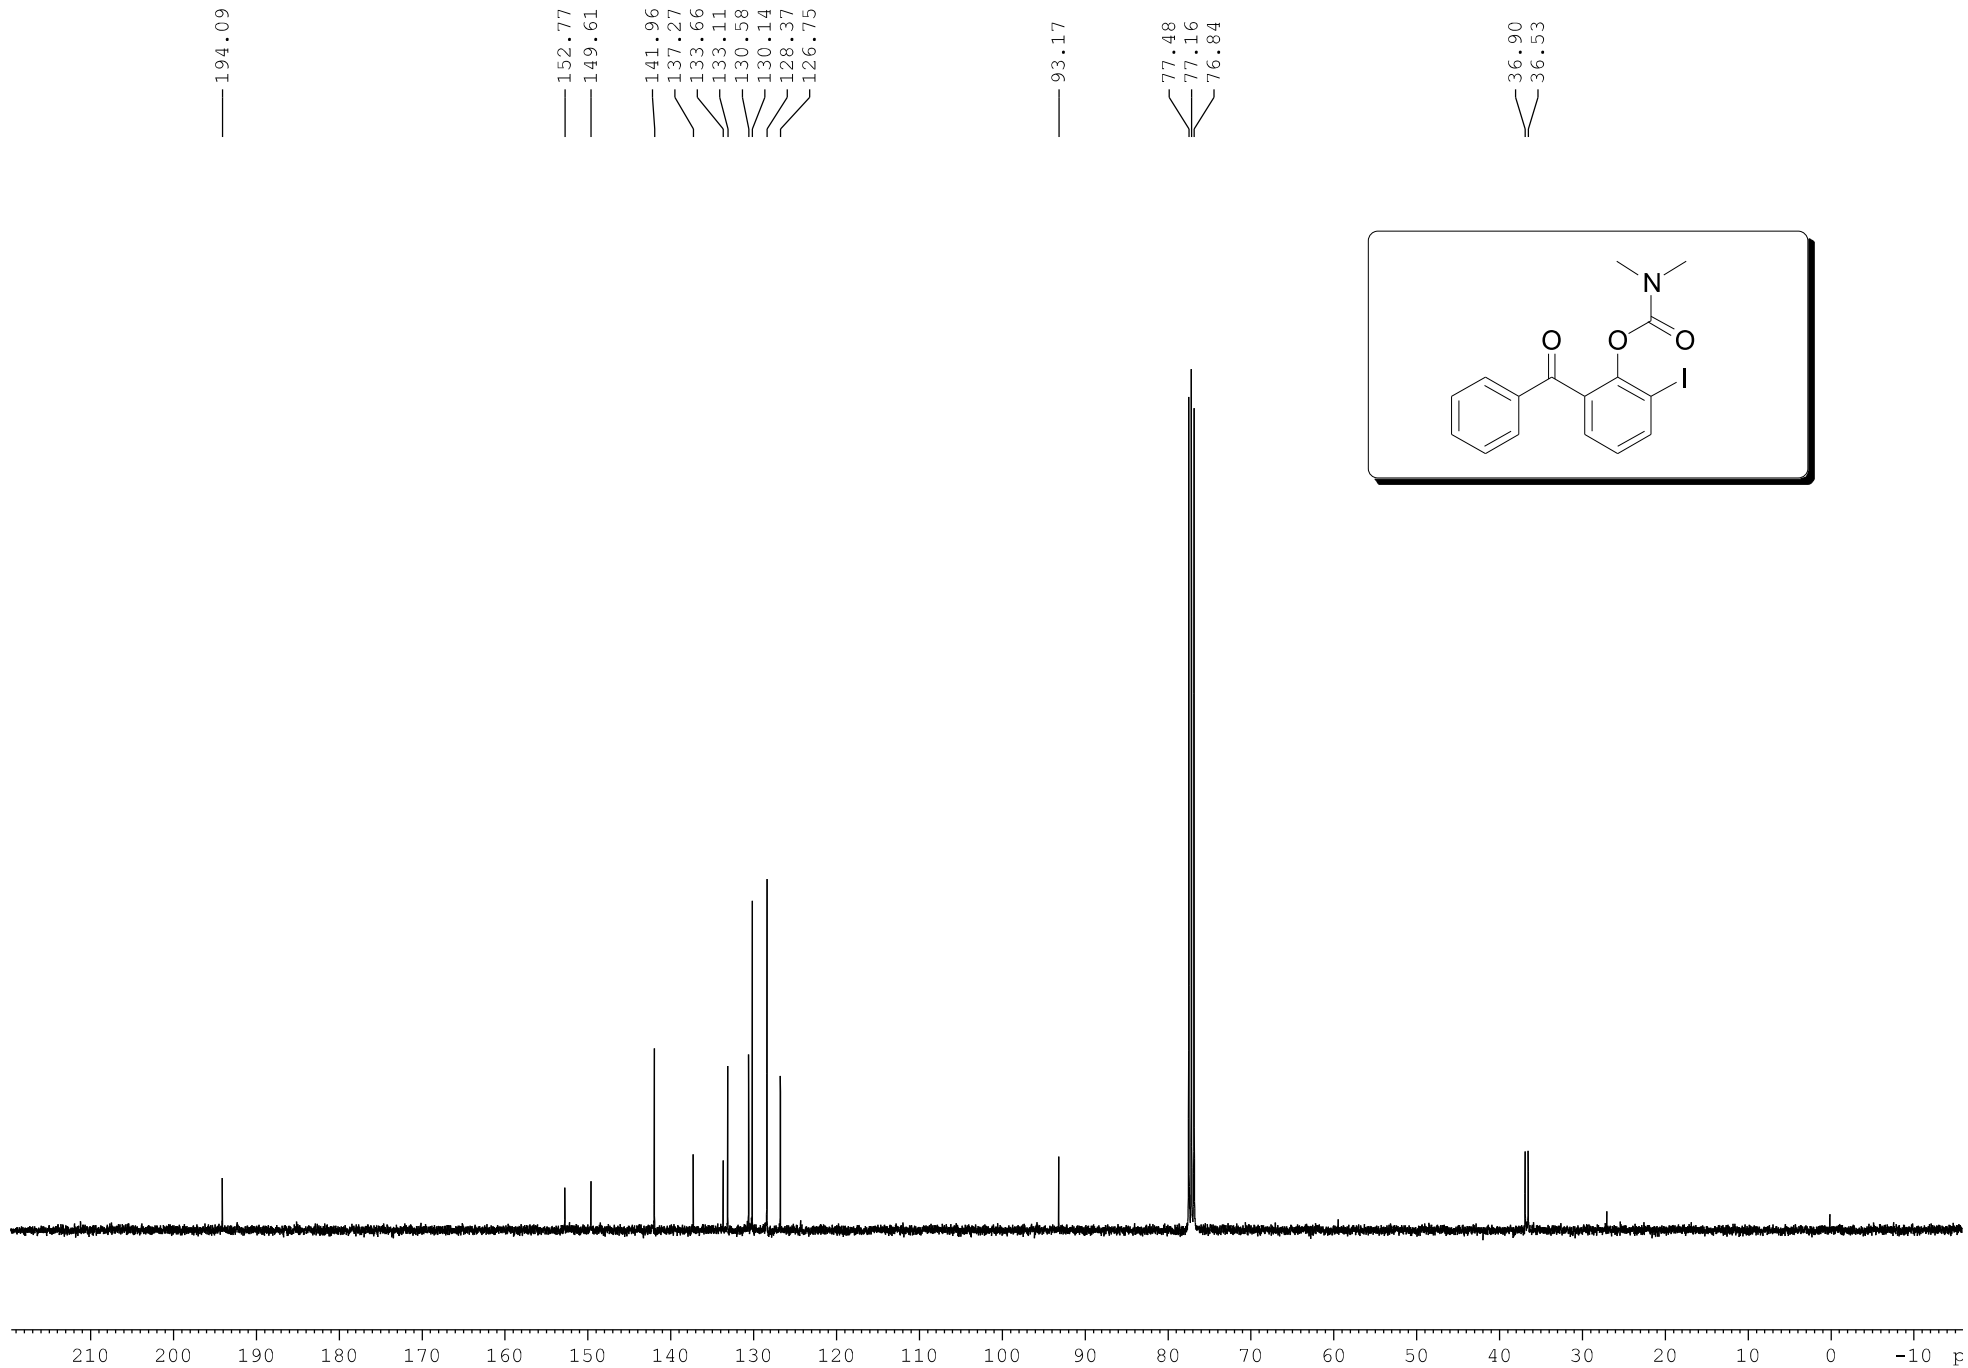

194.09

152.77

149.61

141.96

137.27

133.66

133.11

130.58

130.14

128.37

126.75

93.17

77.48

77.16

76.84

36.90

36.53

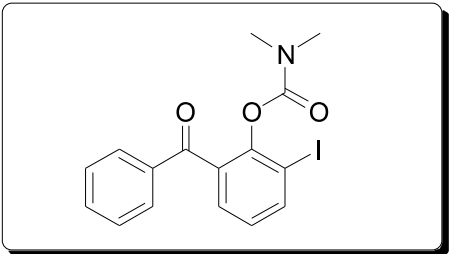

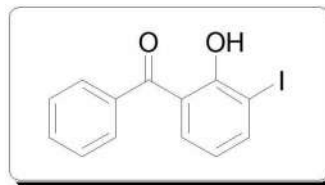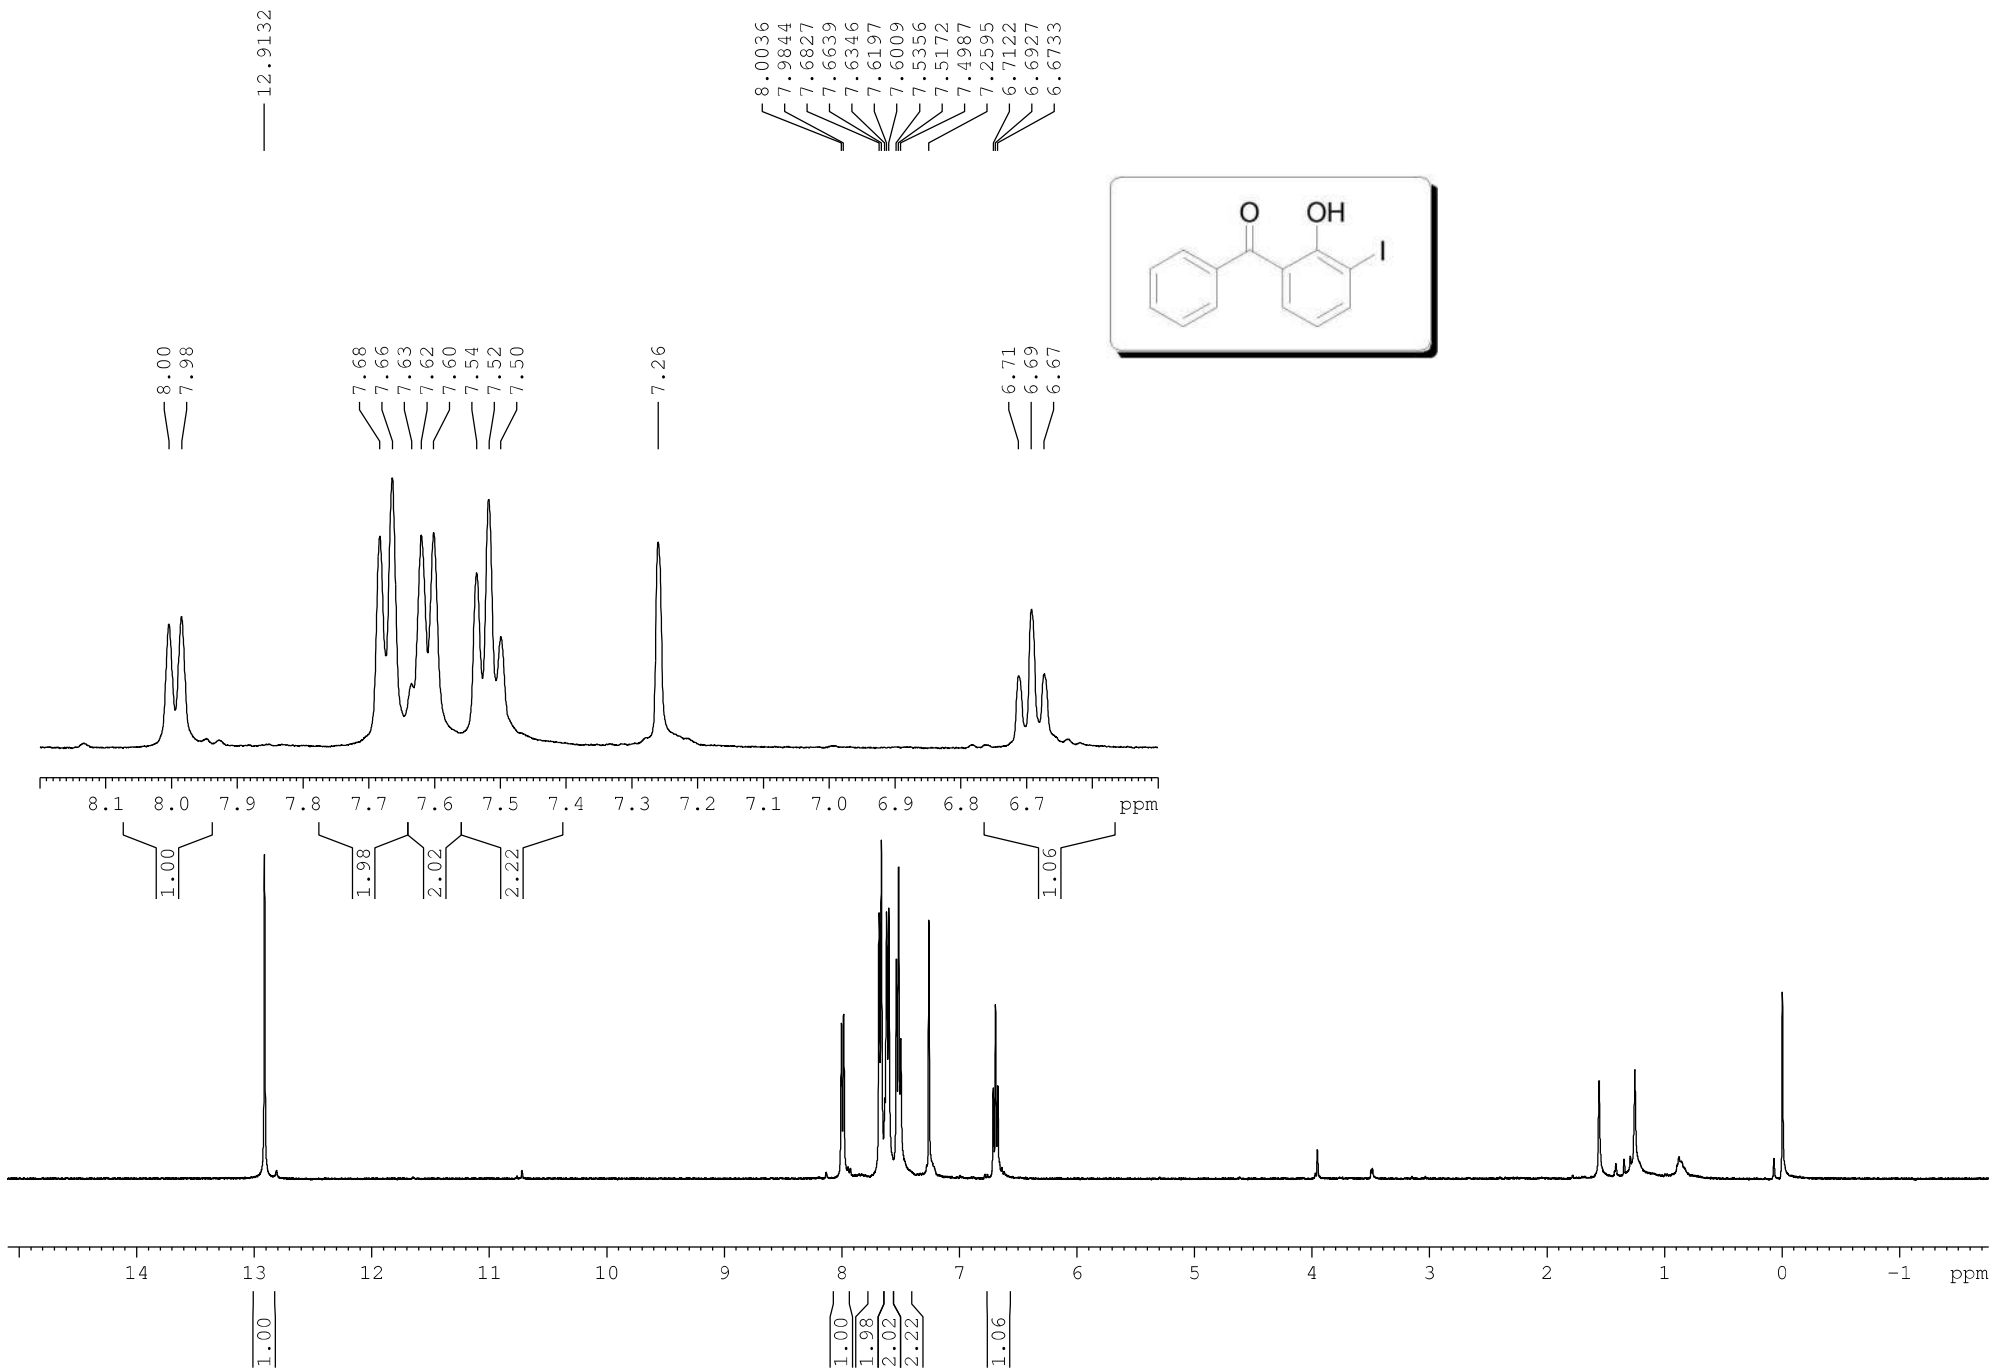

— 201.29

— 161.94

— 145.80

— 137.32

— 134.01

— 132.47

— 129.41

— 128.60

— 120.50

— 119.38

— 86.61

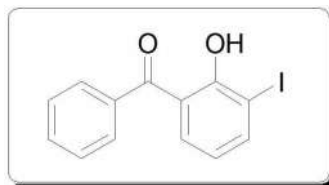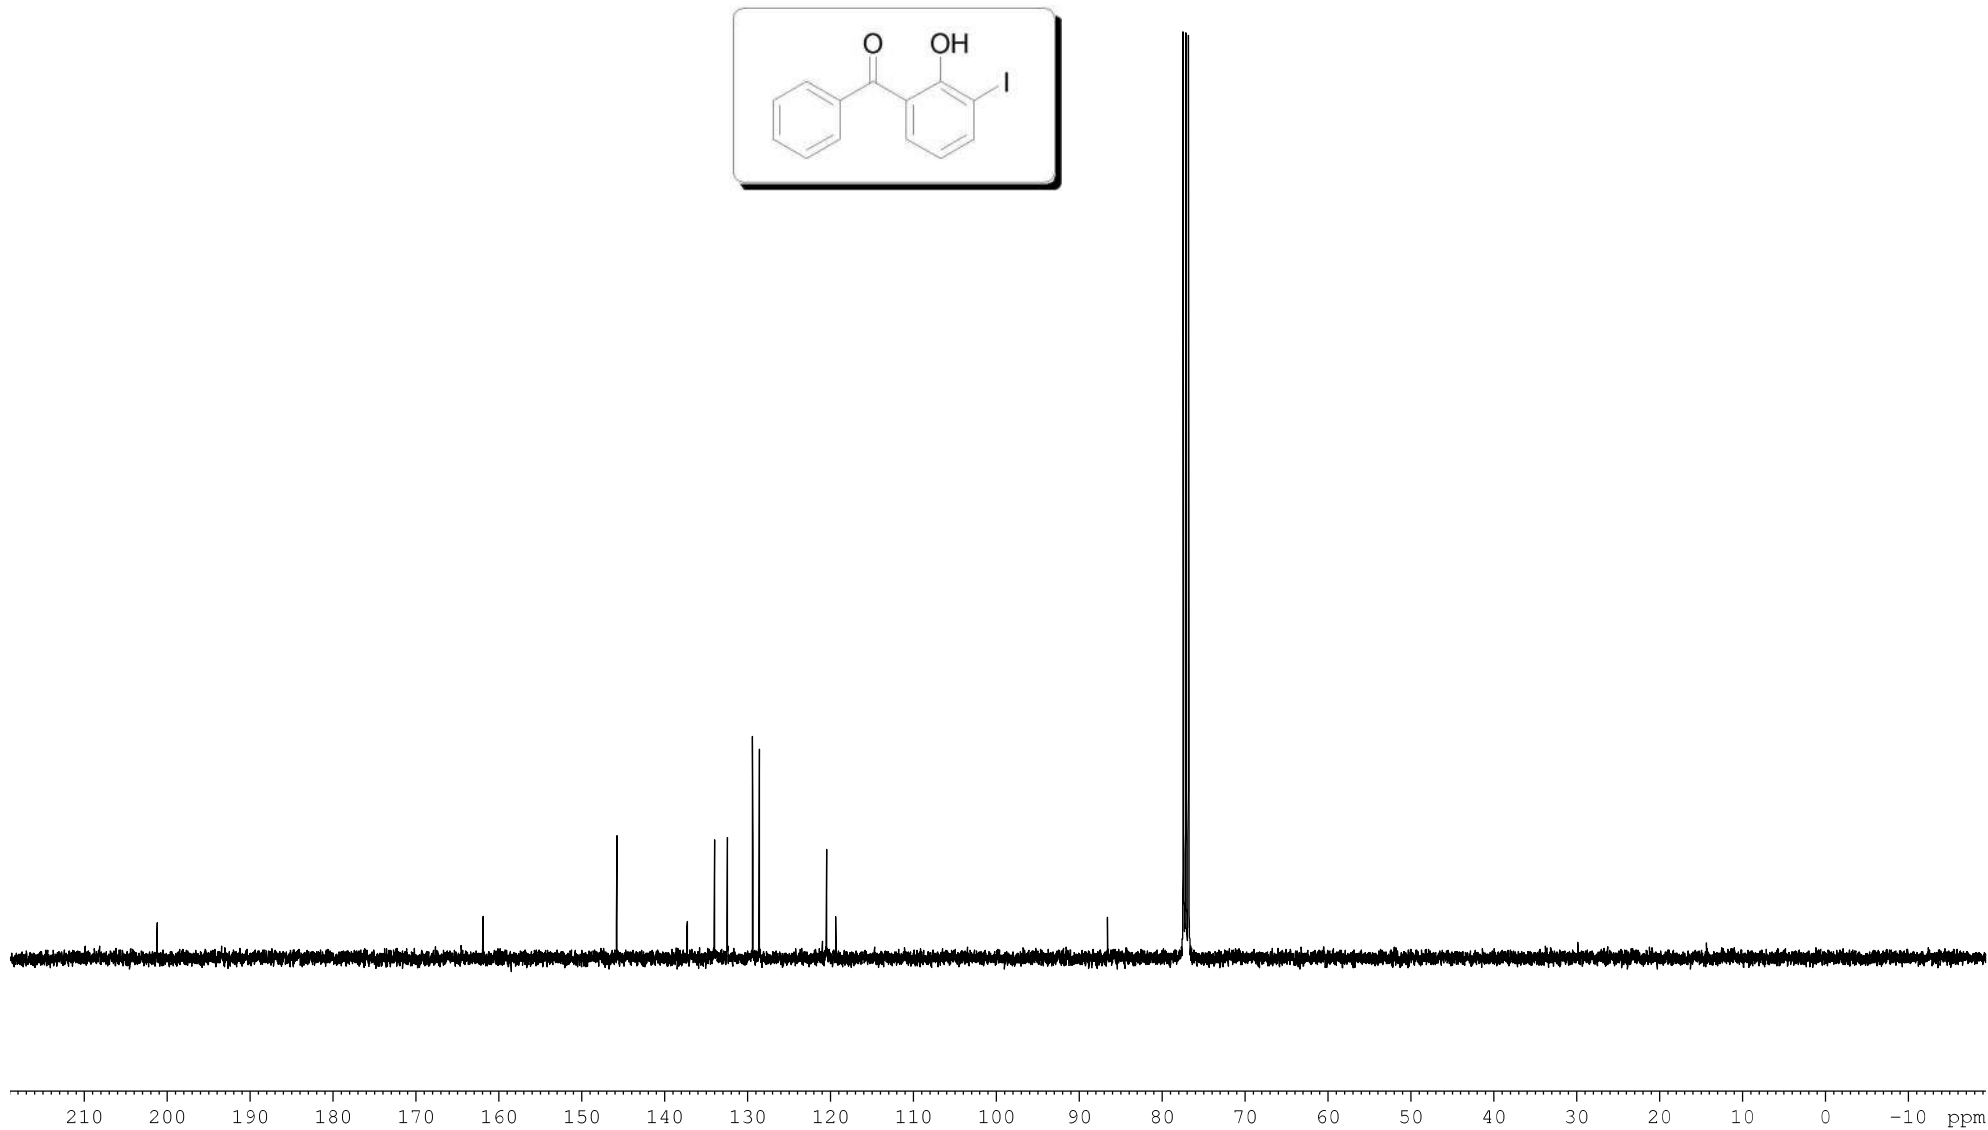

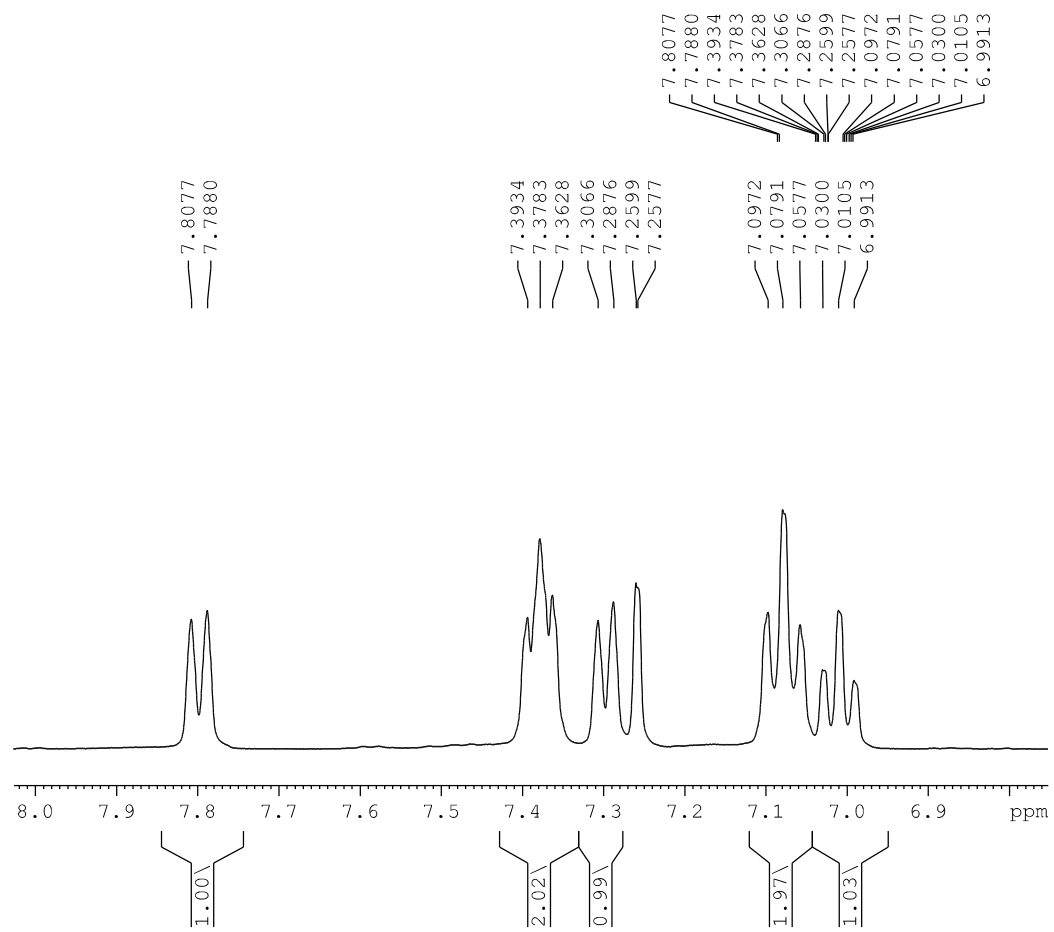

2.9947  
2.8800

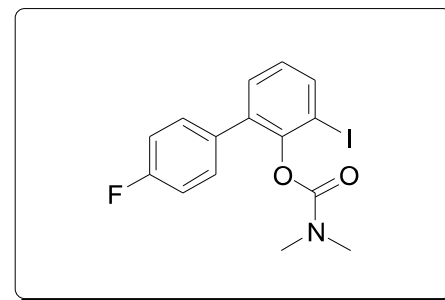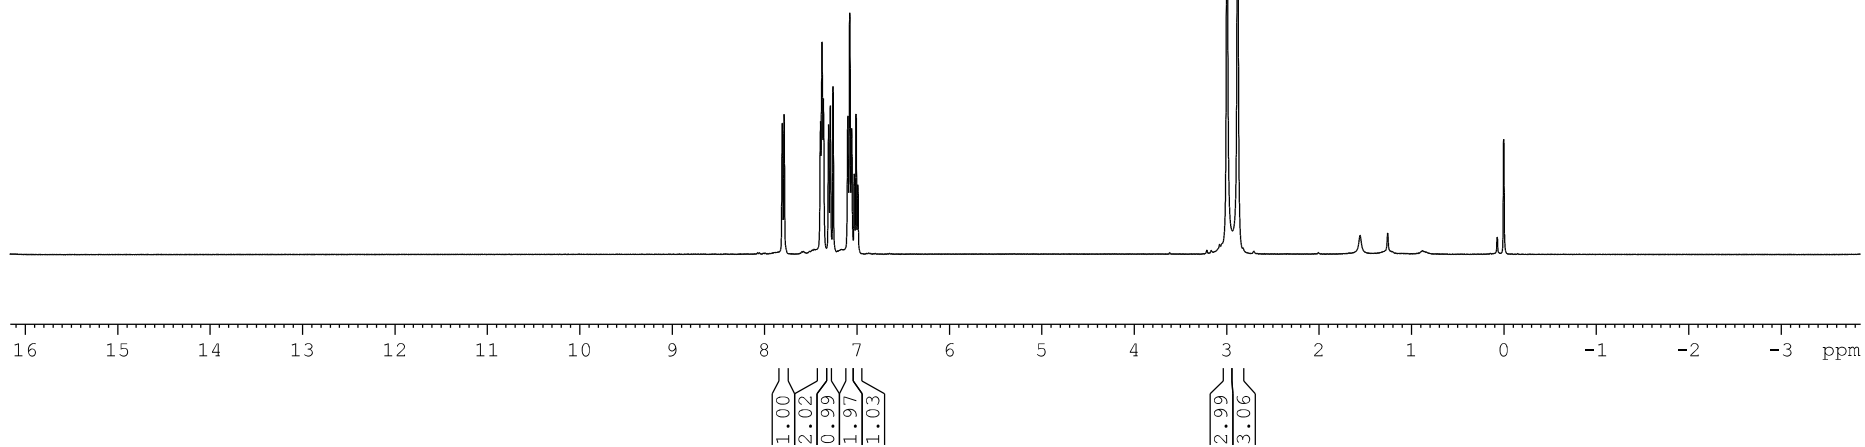

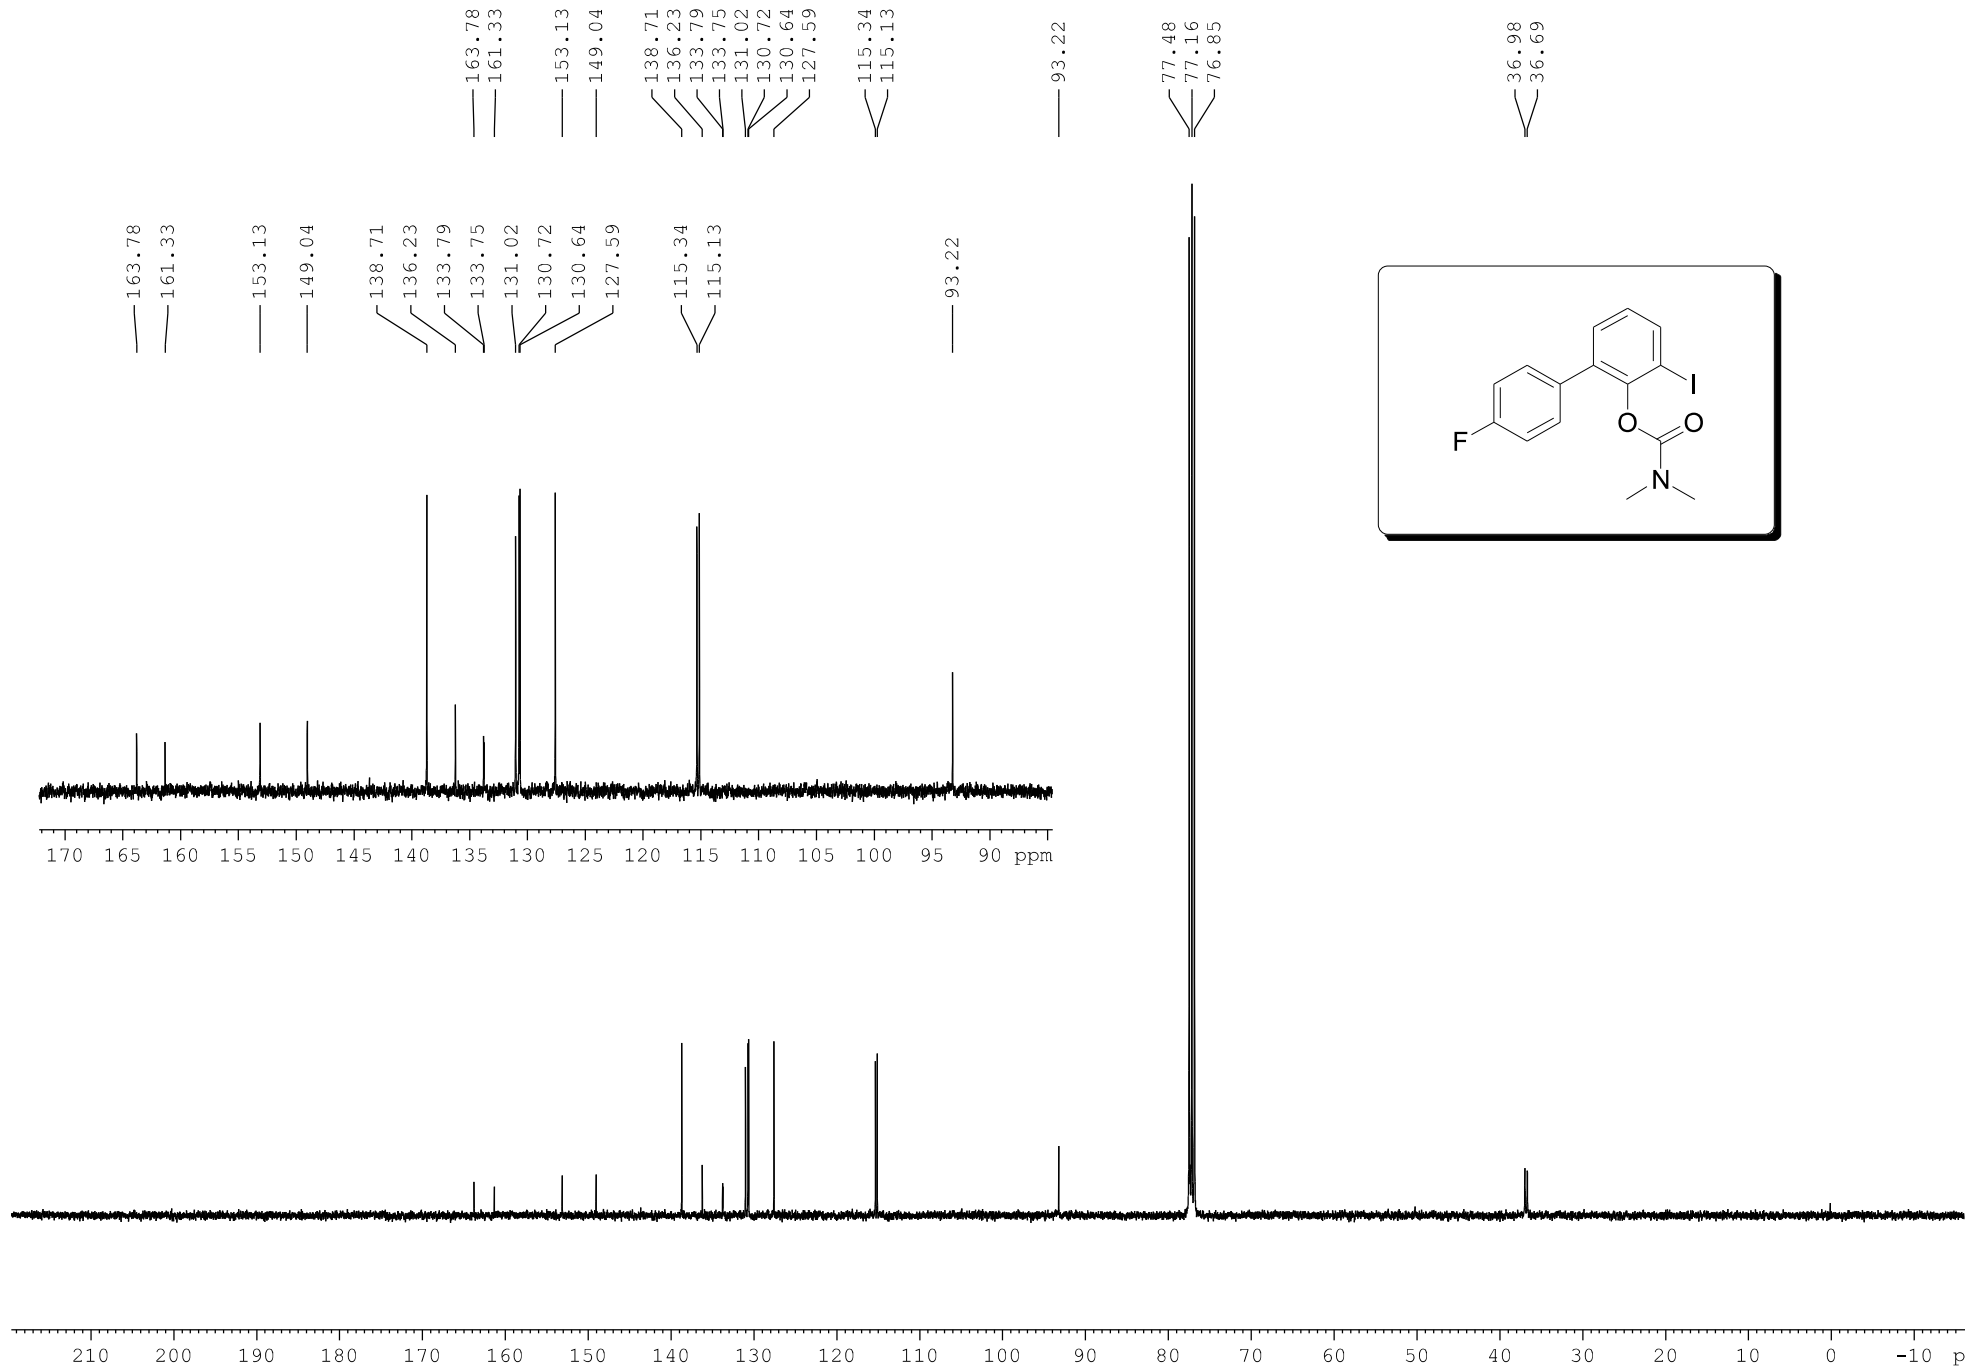



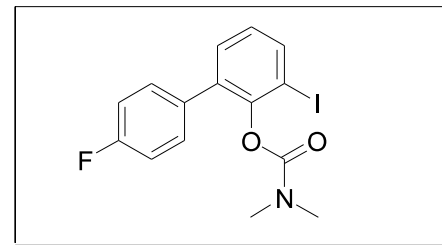

— -114.659

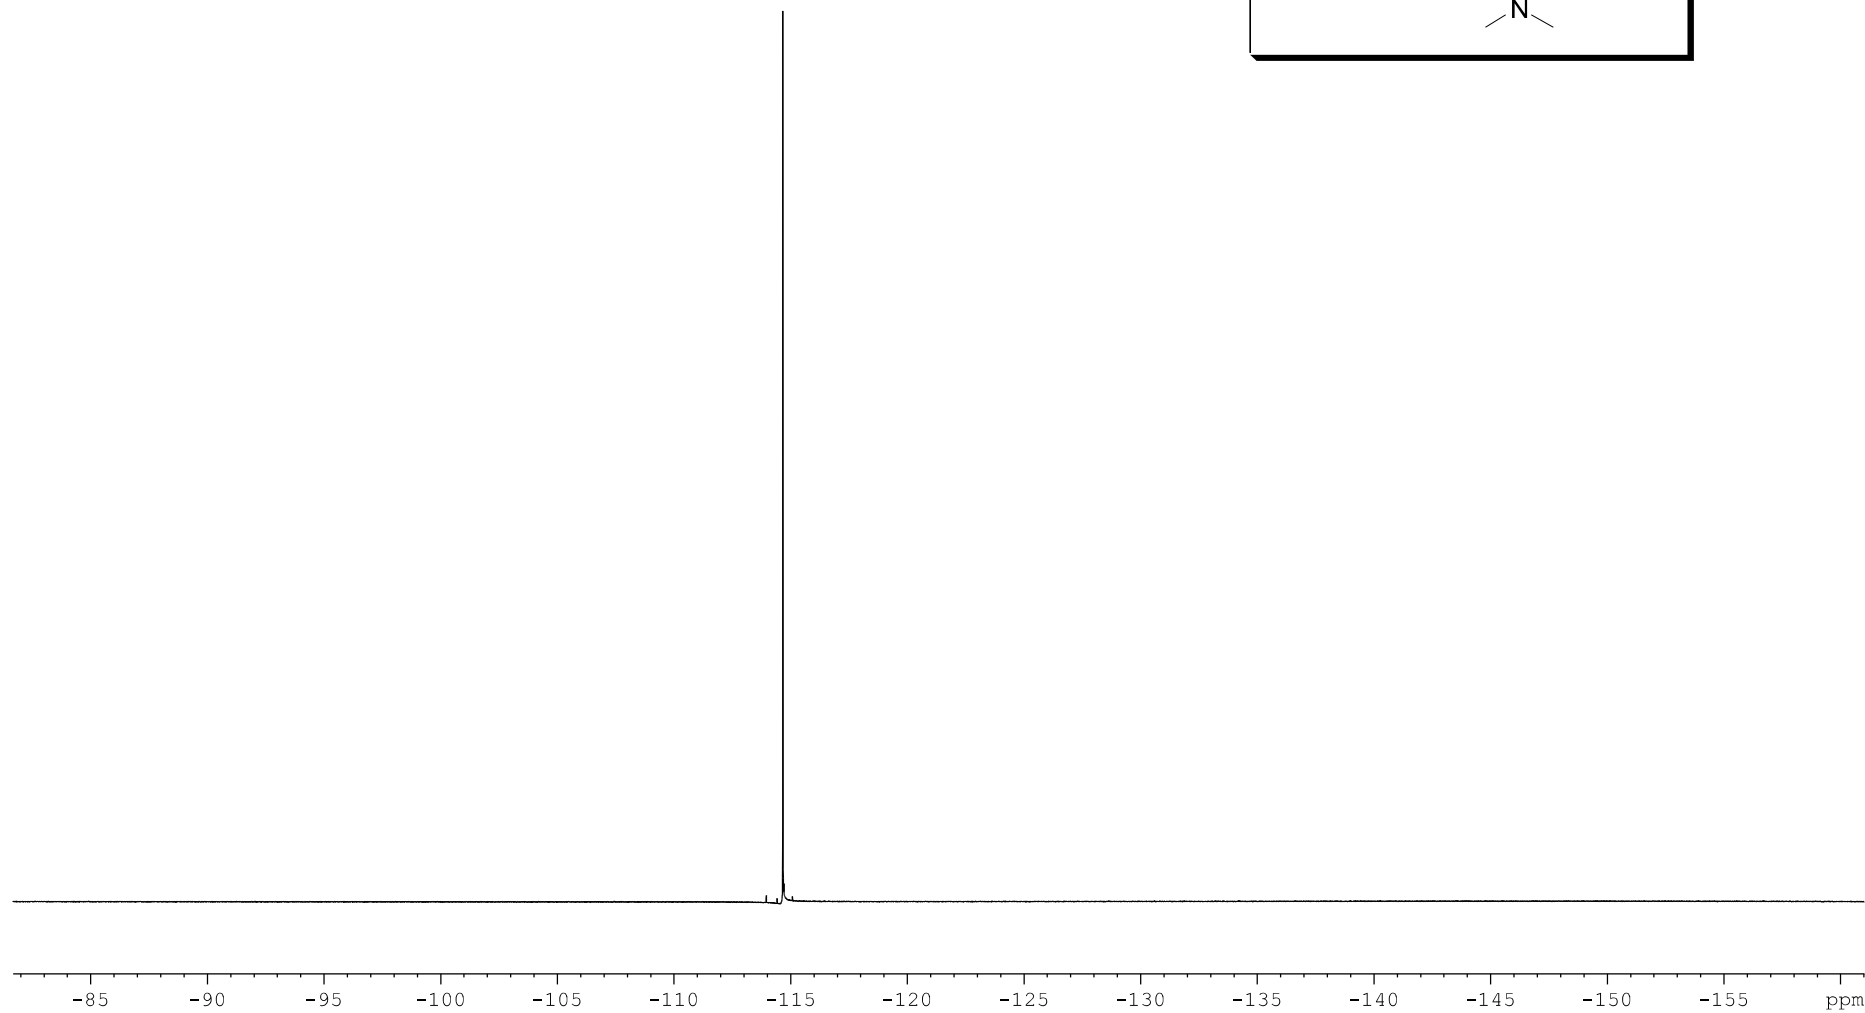

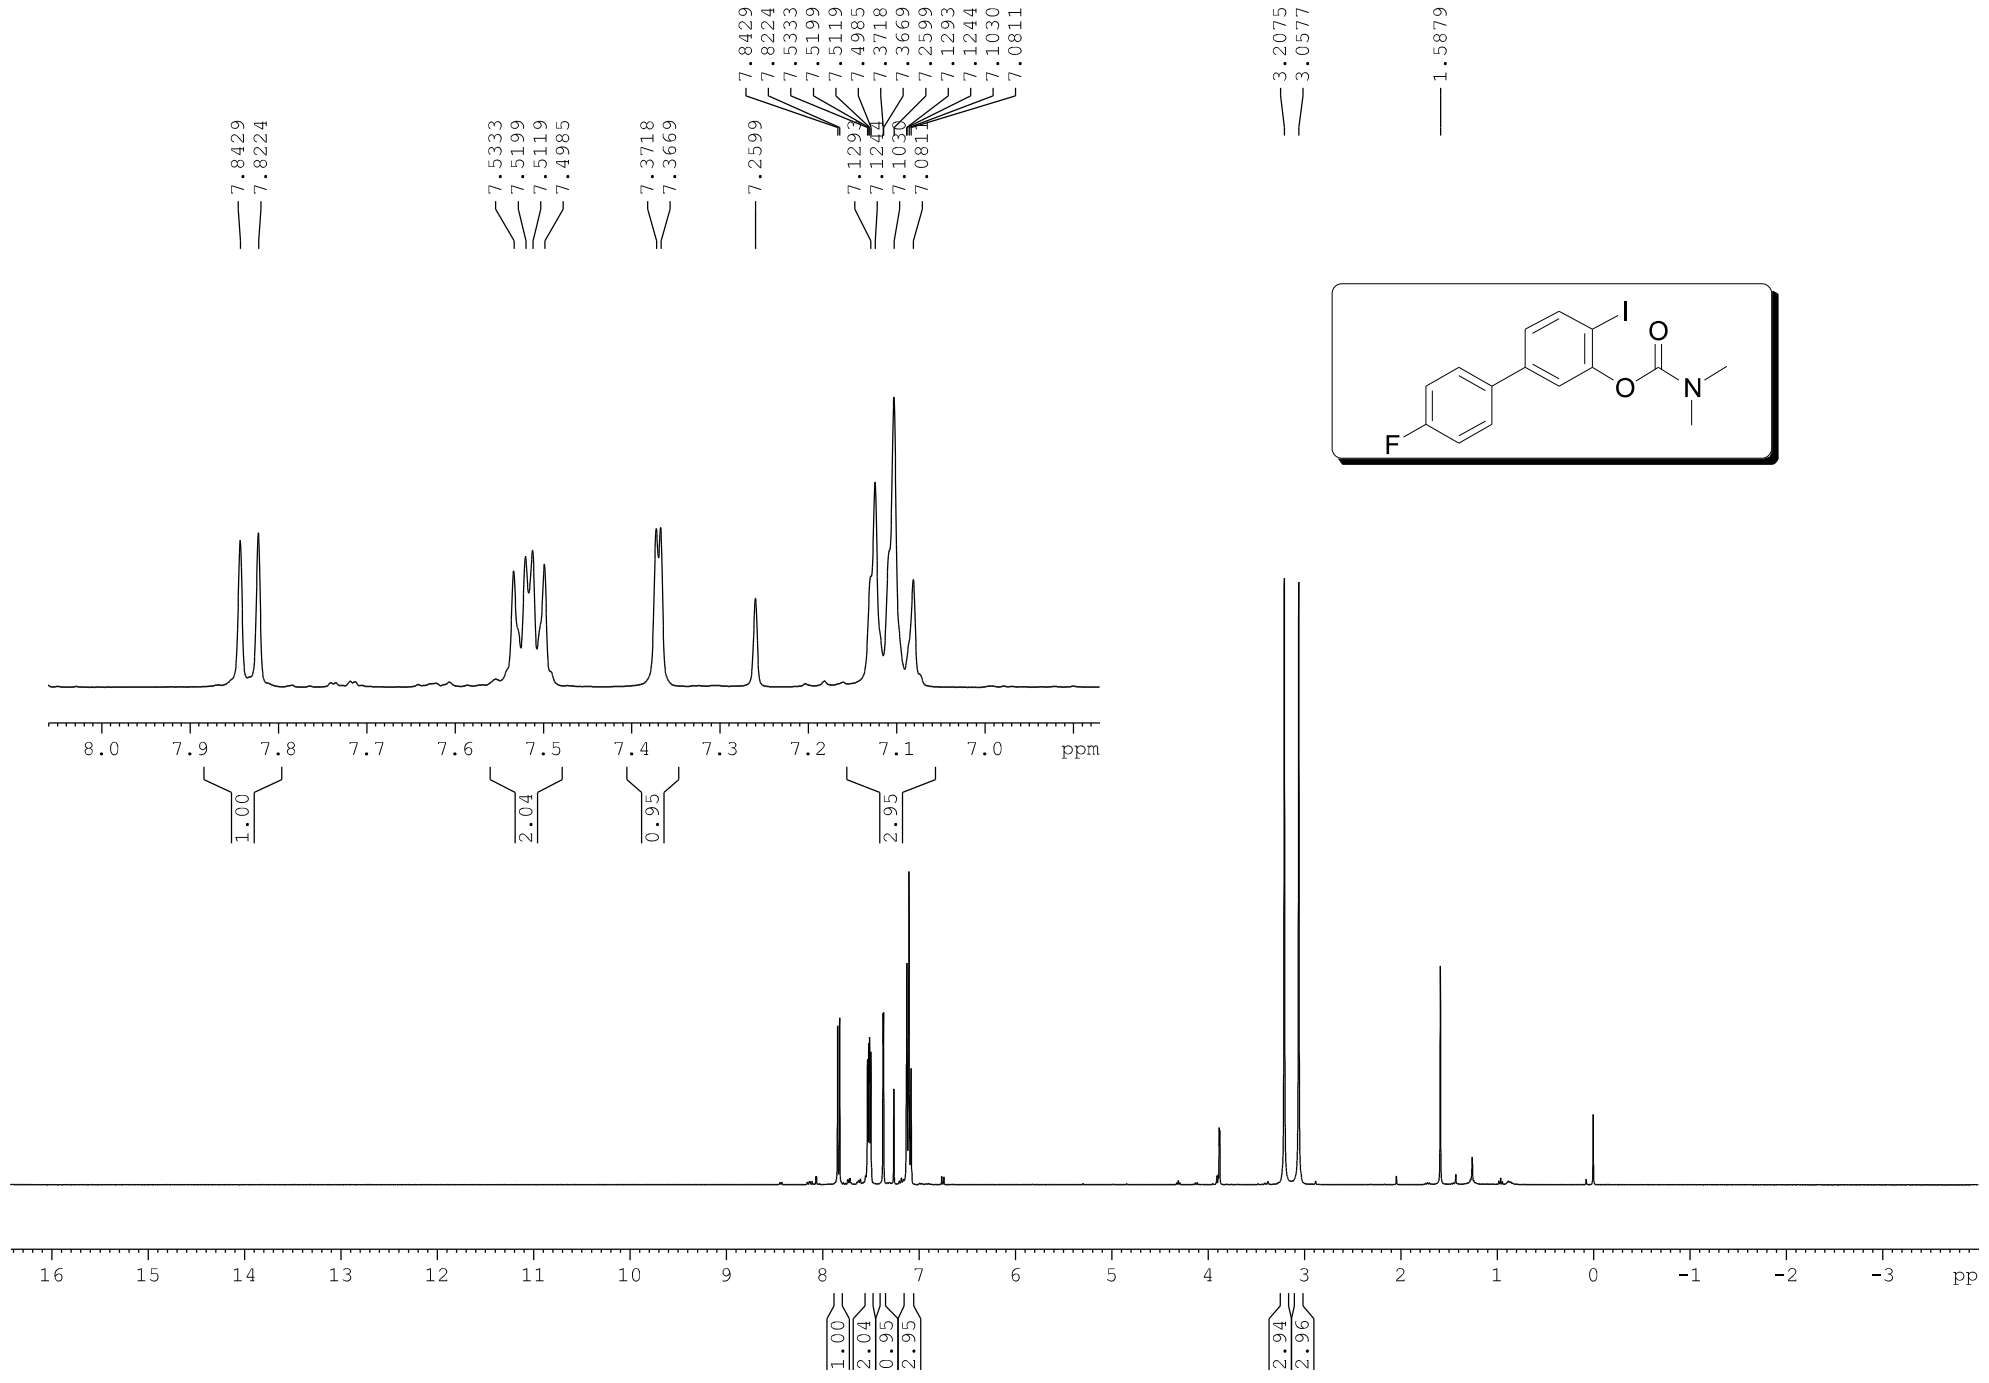

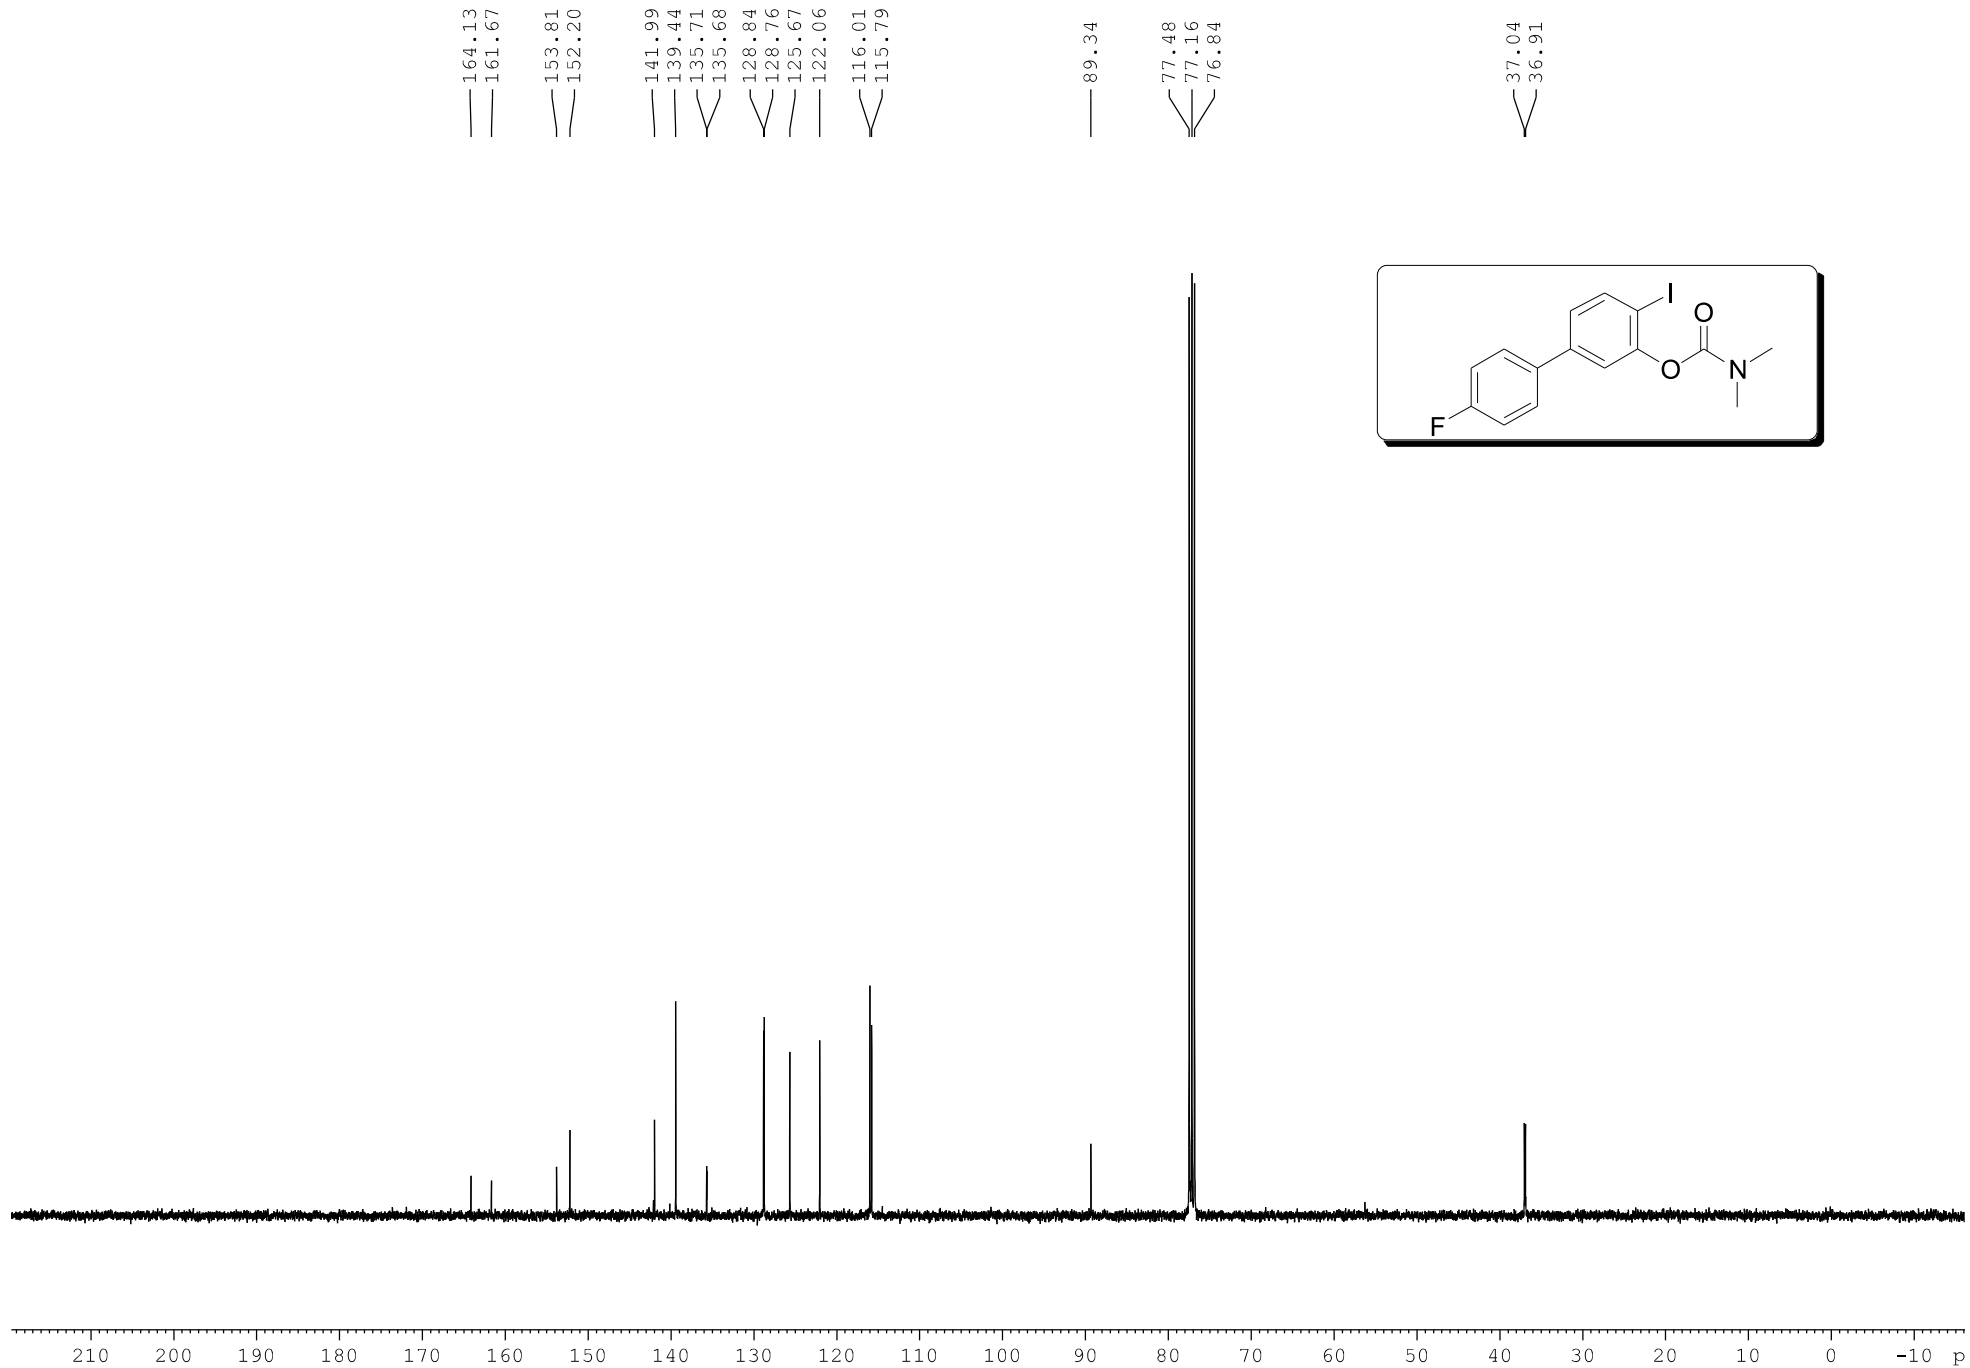

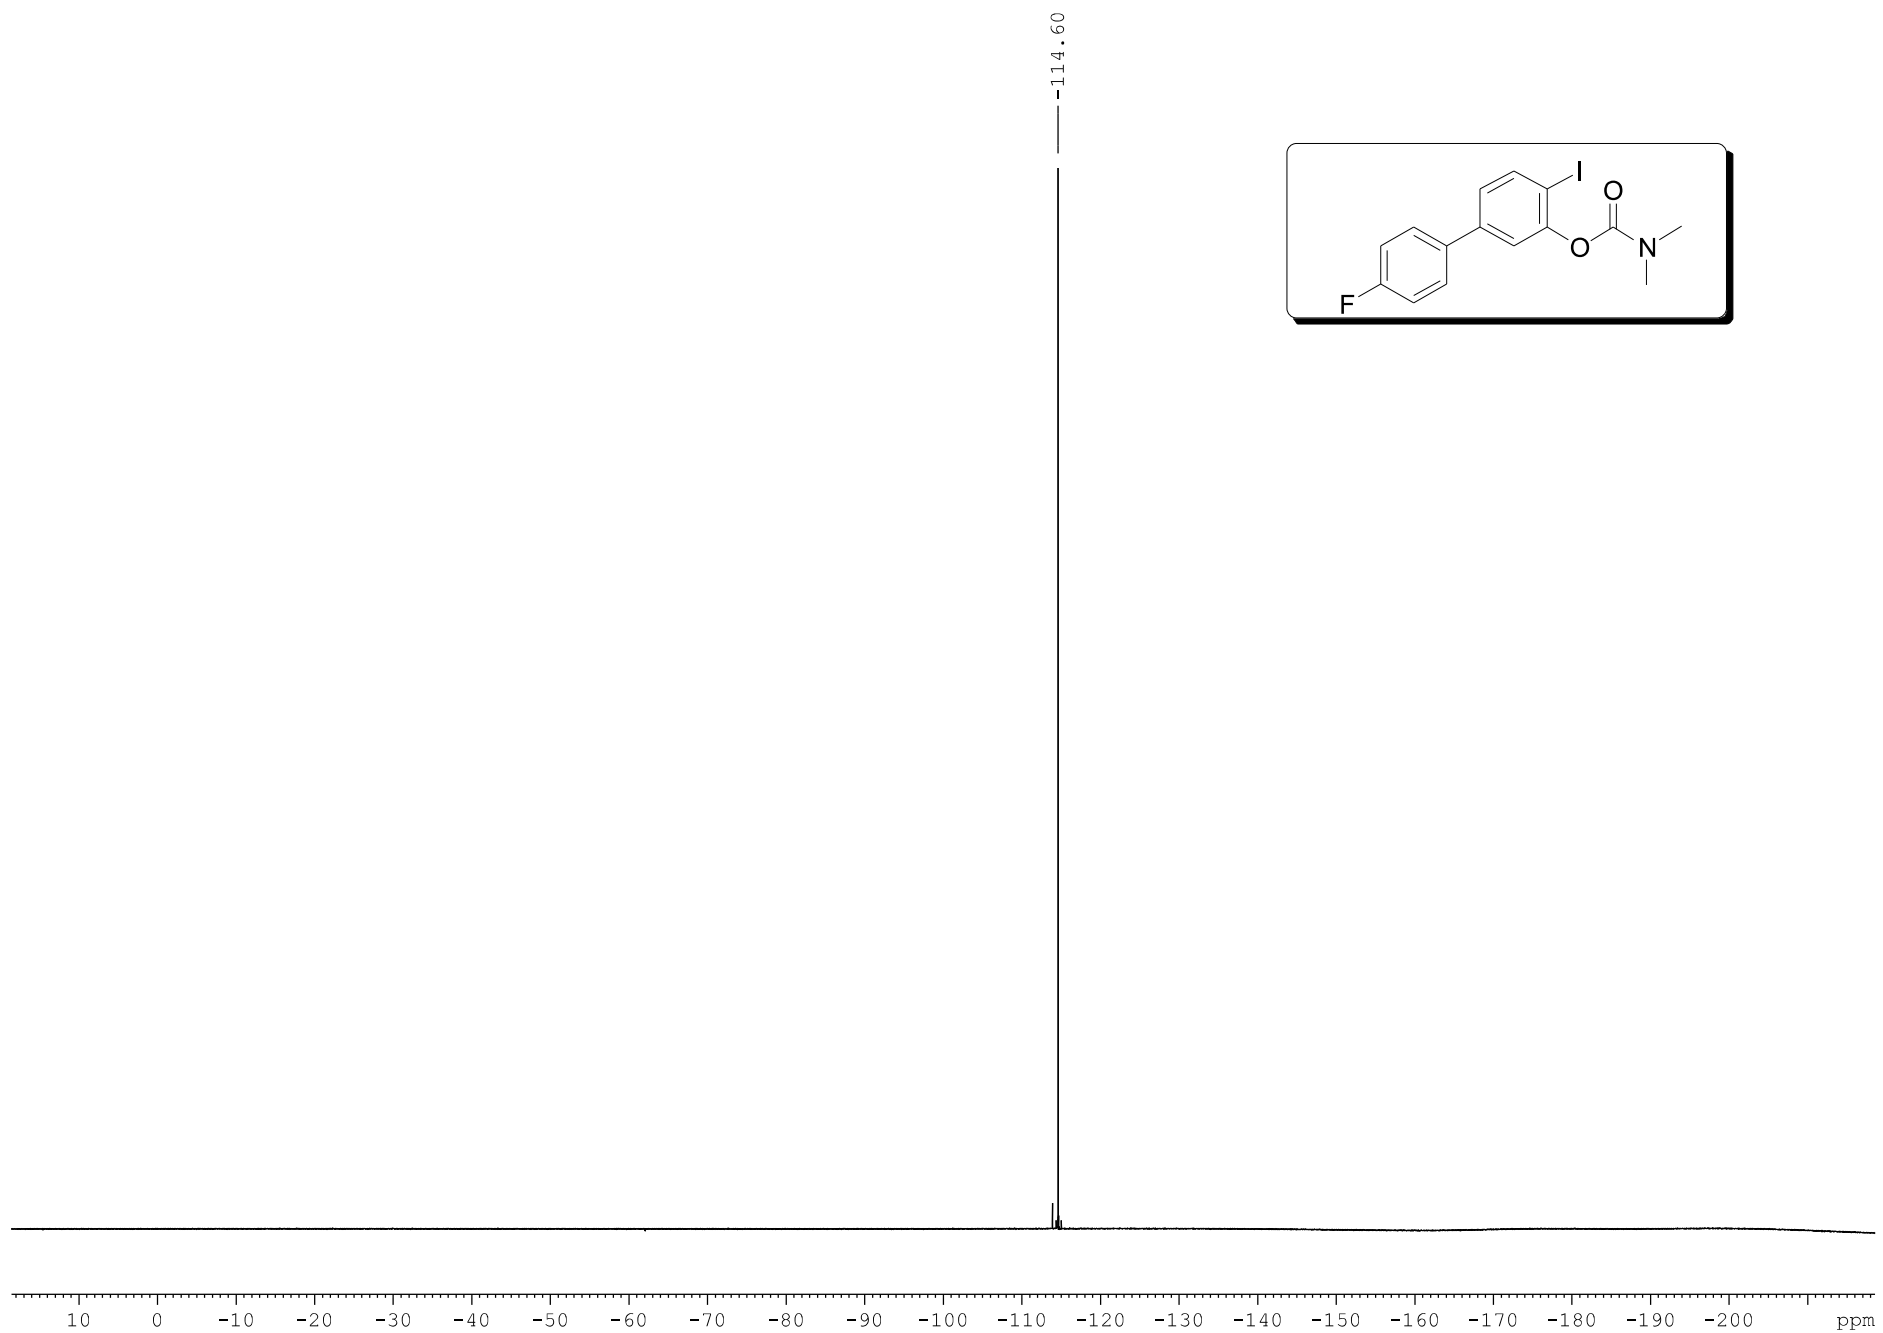

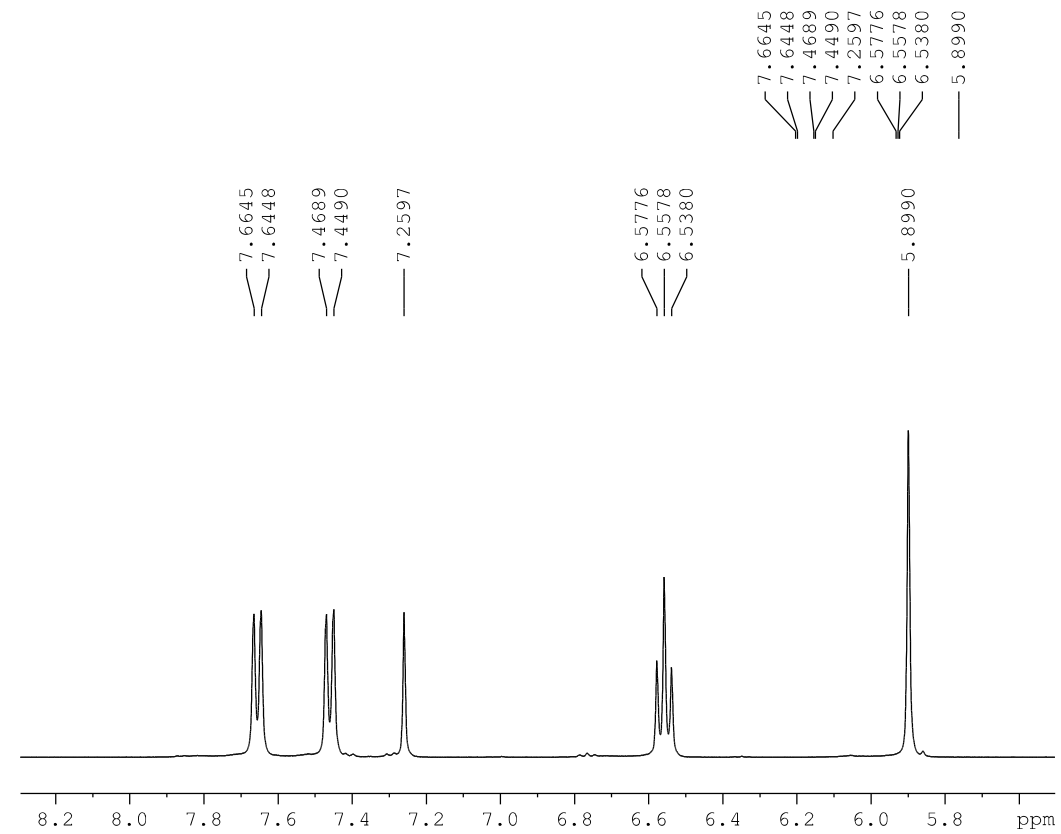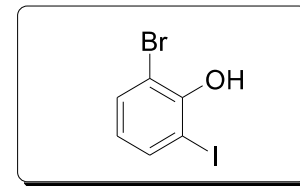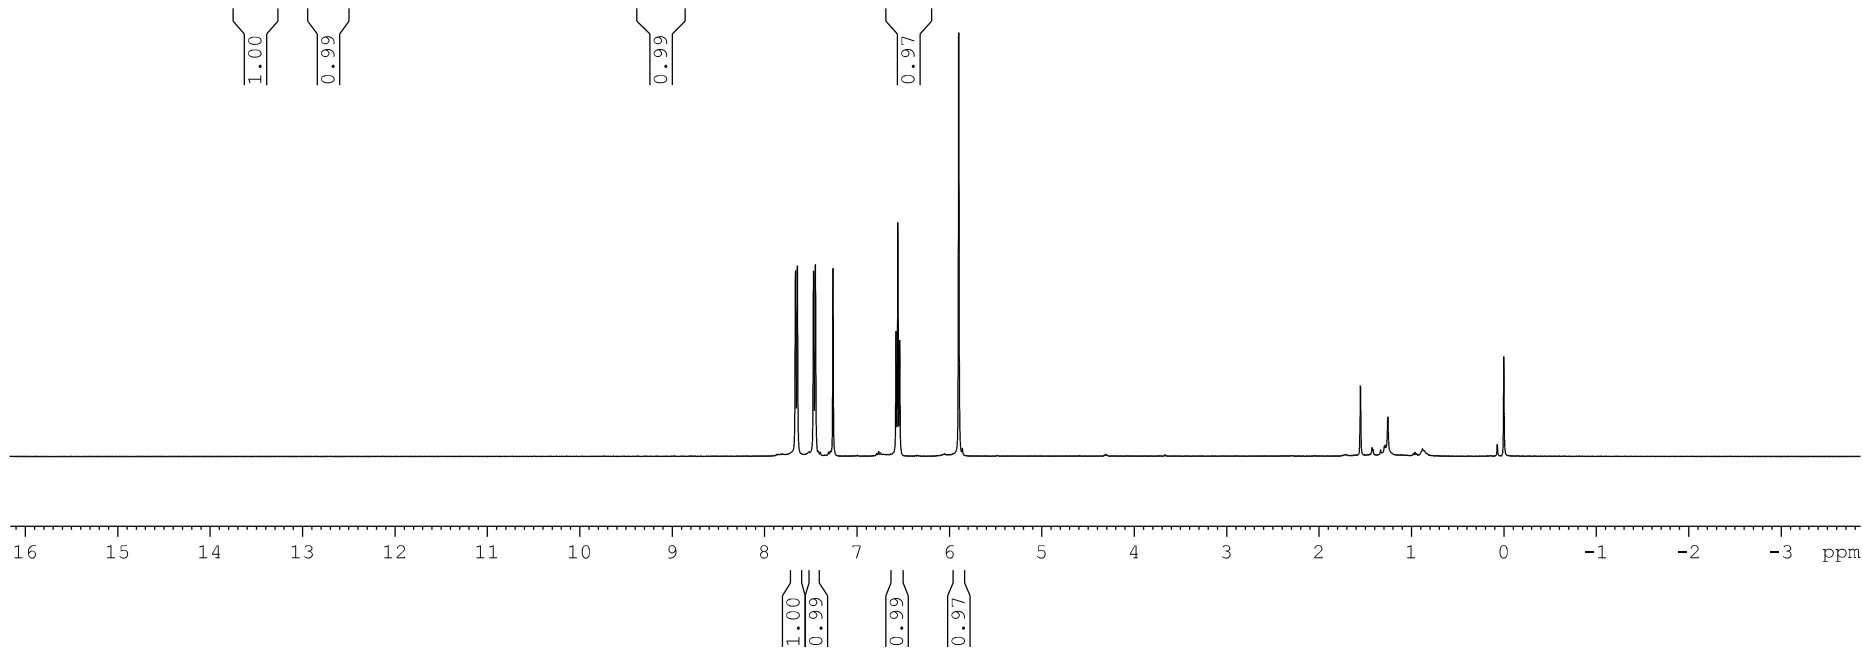

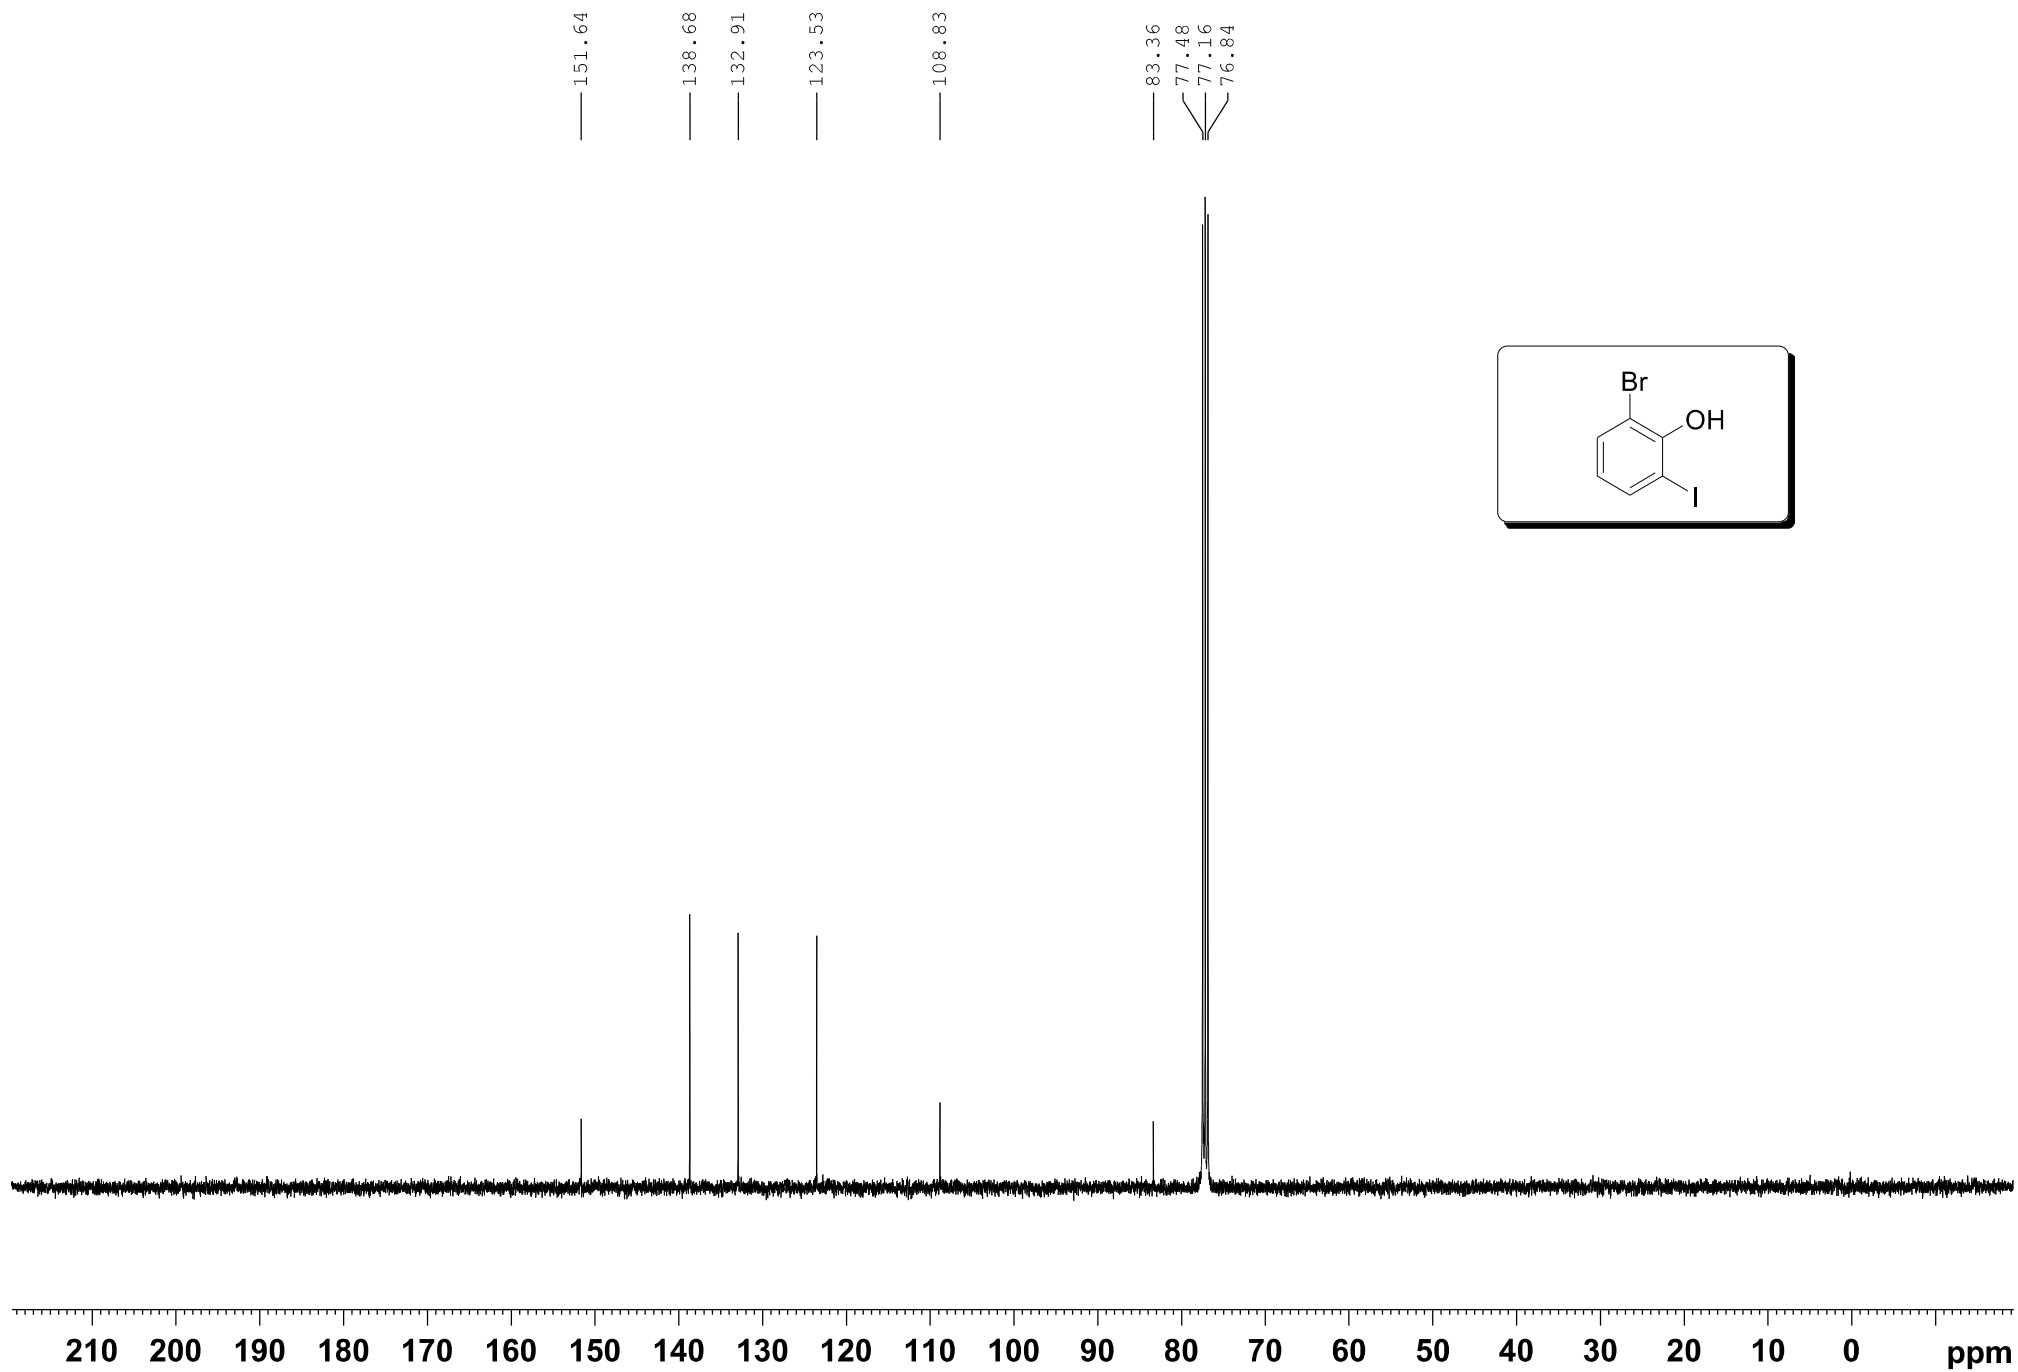

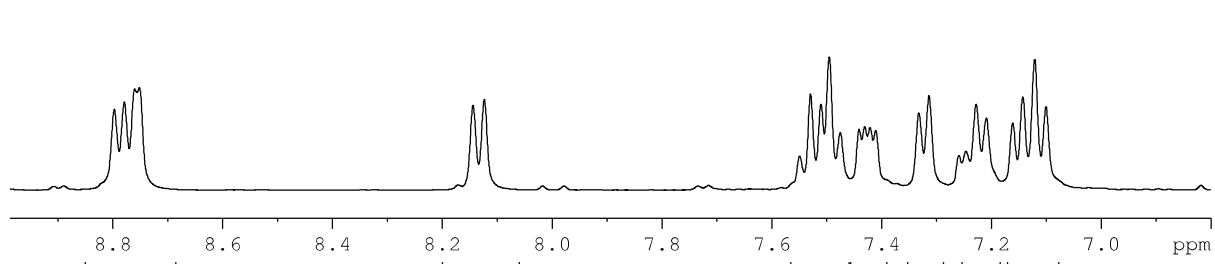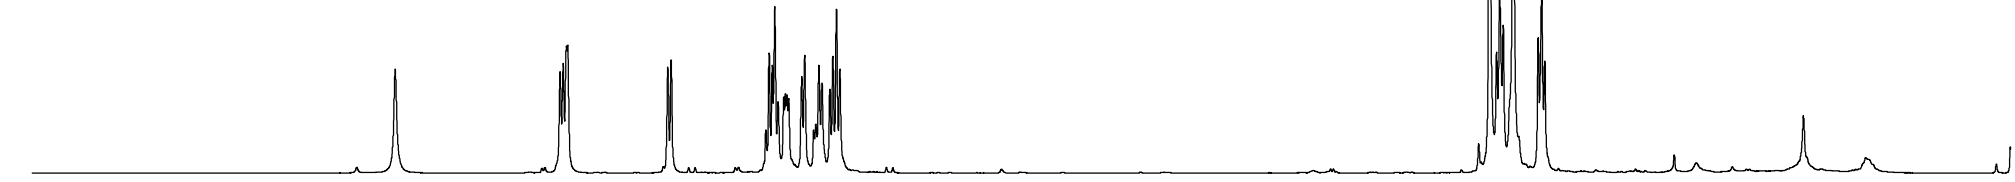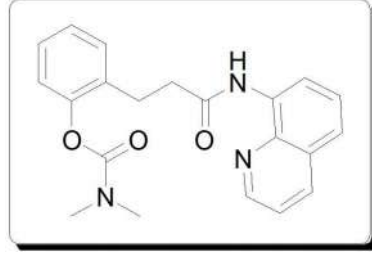

9.7971

8.7971  
8.7789  
8.7601  
8.7512  
8.1443  
8.1238  
7.5494  
7.5297  
7.5106  
7.4956  
7.4754  
7.4412  
7.4310  
7.4211  
7.4109  
7.3323  
7.3139  
7.2593  
7.2466  
7.2280  
7.2093  
7.1613  
7.1430  
7.1213  
7.1007

3.1600  
3.1176  
3.0988  
3.0780  
3.0179  
2.8657  
2.8445  
2.8259

8.7971  
8.7789  
8.7601  
8.7512

8.1443  
8.1238

7.5494  
7.5297  
7.5106  
7.4956  
7.4754  
7.4412  
7.4310  
7.4211  
7.4109  
7.3323  
7.3139  
7.2593  
7.2466  
7.2280  
7.2093  
7.1613  
7.1430  
7.1213  
7.1007

2.08

1.07

2.17  
1.11  
1.04  
1.22  
2.12

11.5 11.0 10.5 10.0 9.5 9.0 8.5 8.0 7.5 7.0 6.5 6.0 5.5 5.0 4.5 4.0 3.5 3.0 2.5 2.0 1.5 1.0 0.5 ppm

1.00

2.08

1.07

2.17  
1.11  
1.04  
1.22  
2.12

2.94  
2.37  
2.97  
2.14

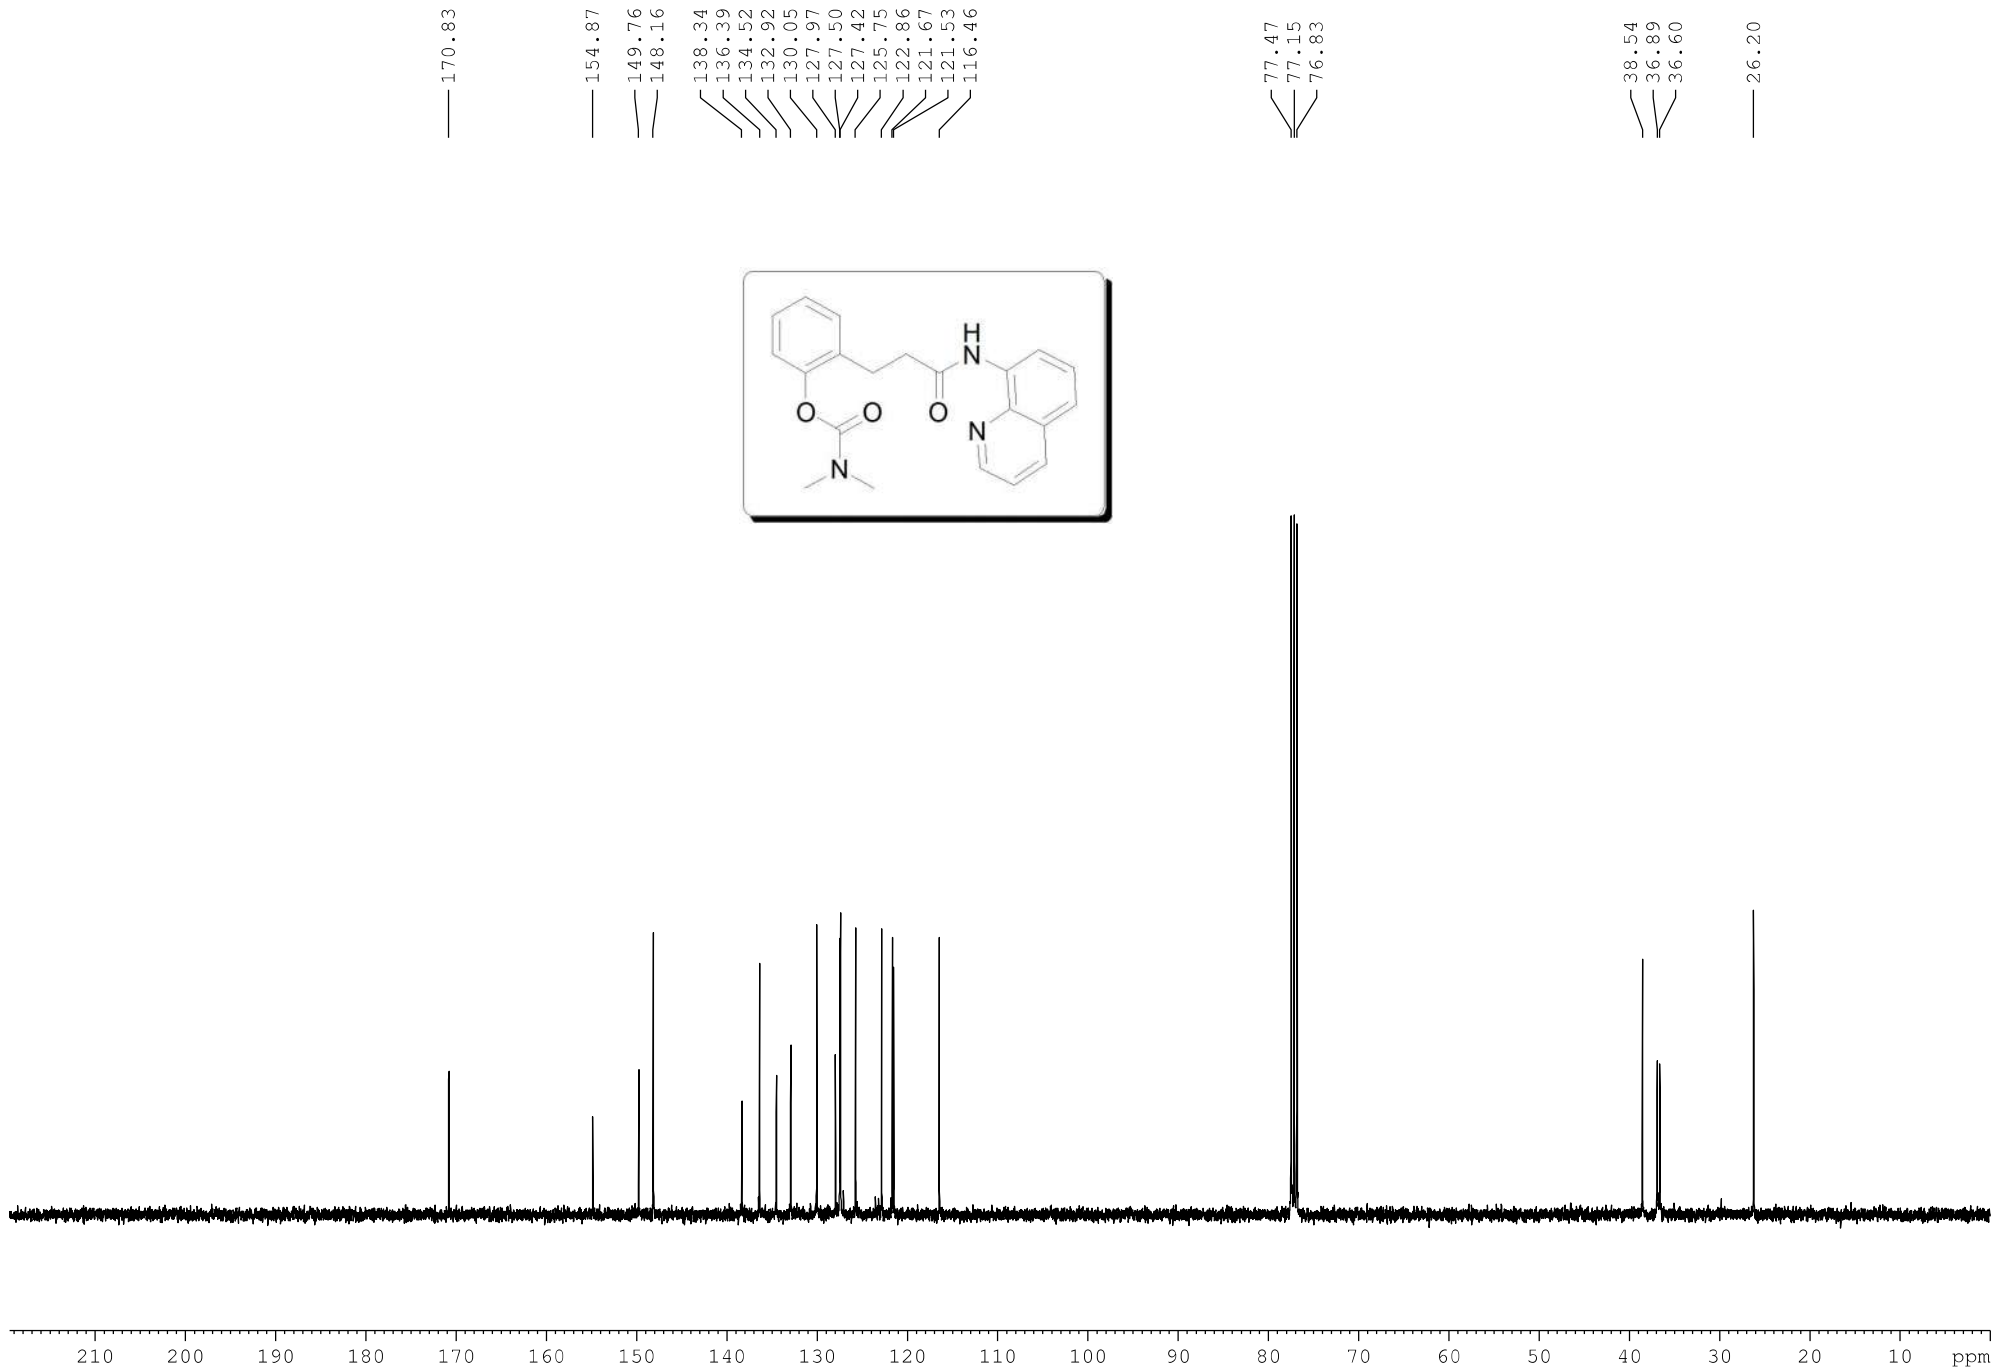



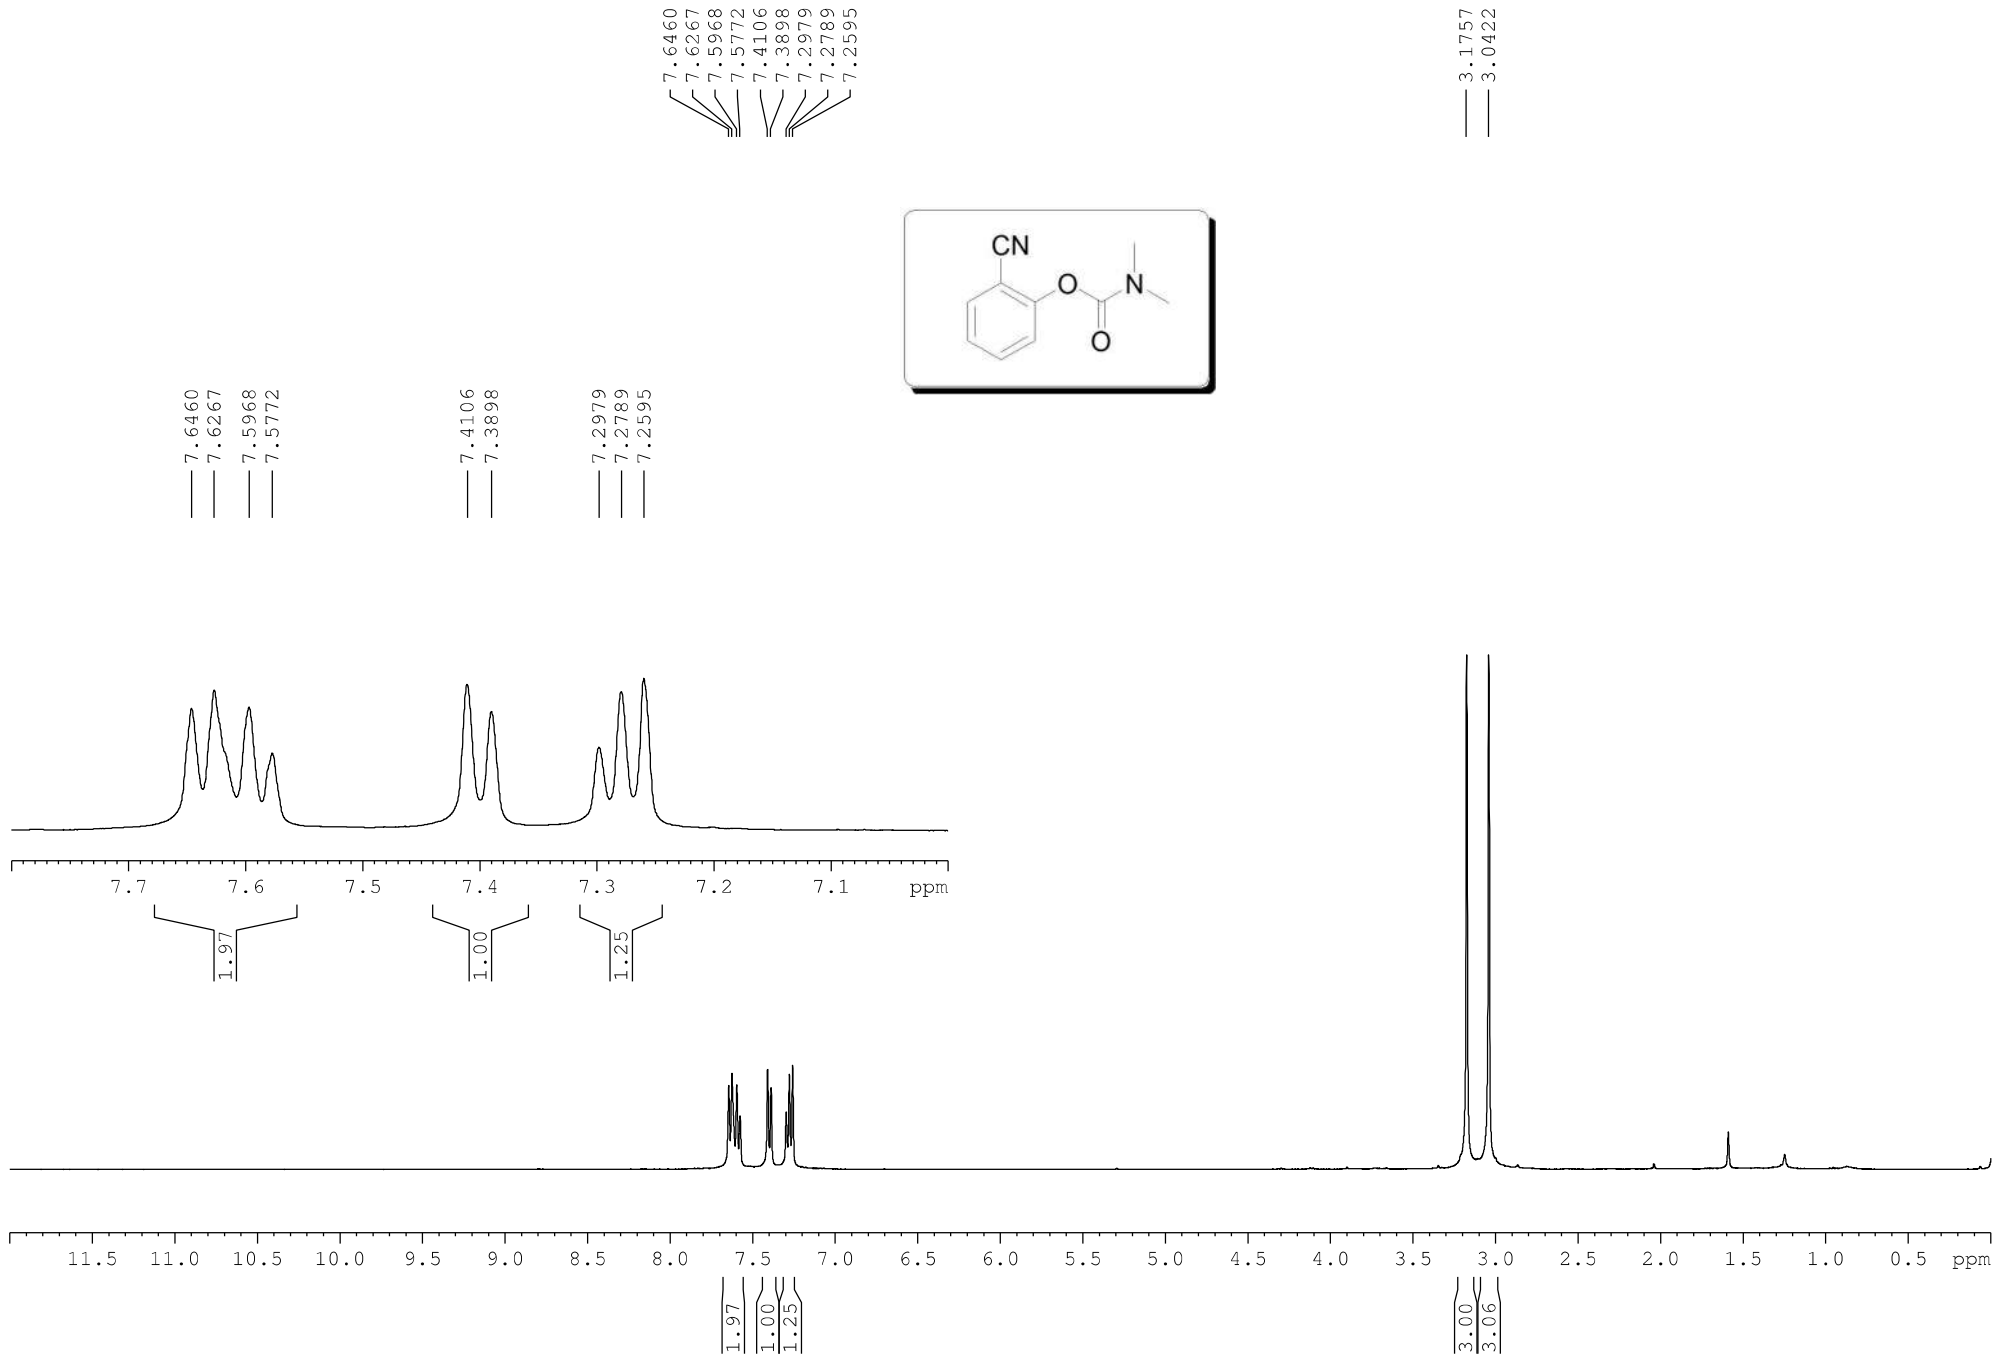

153.42  
153.24

133.95  
133.07

125.58  
123.46

115.63

106.91

77.47  
77.16  
76.84

37.03  
36.75

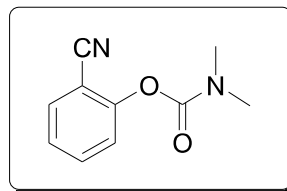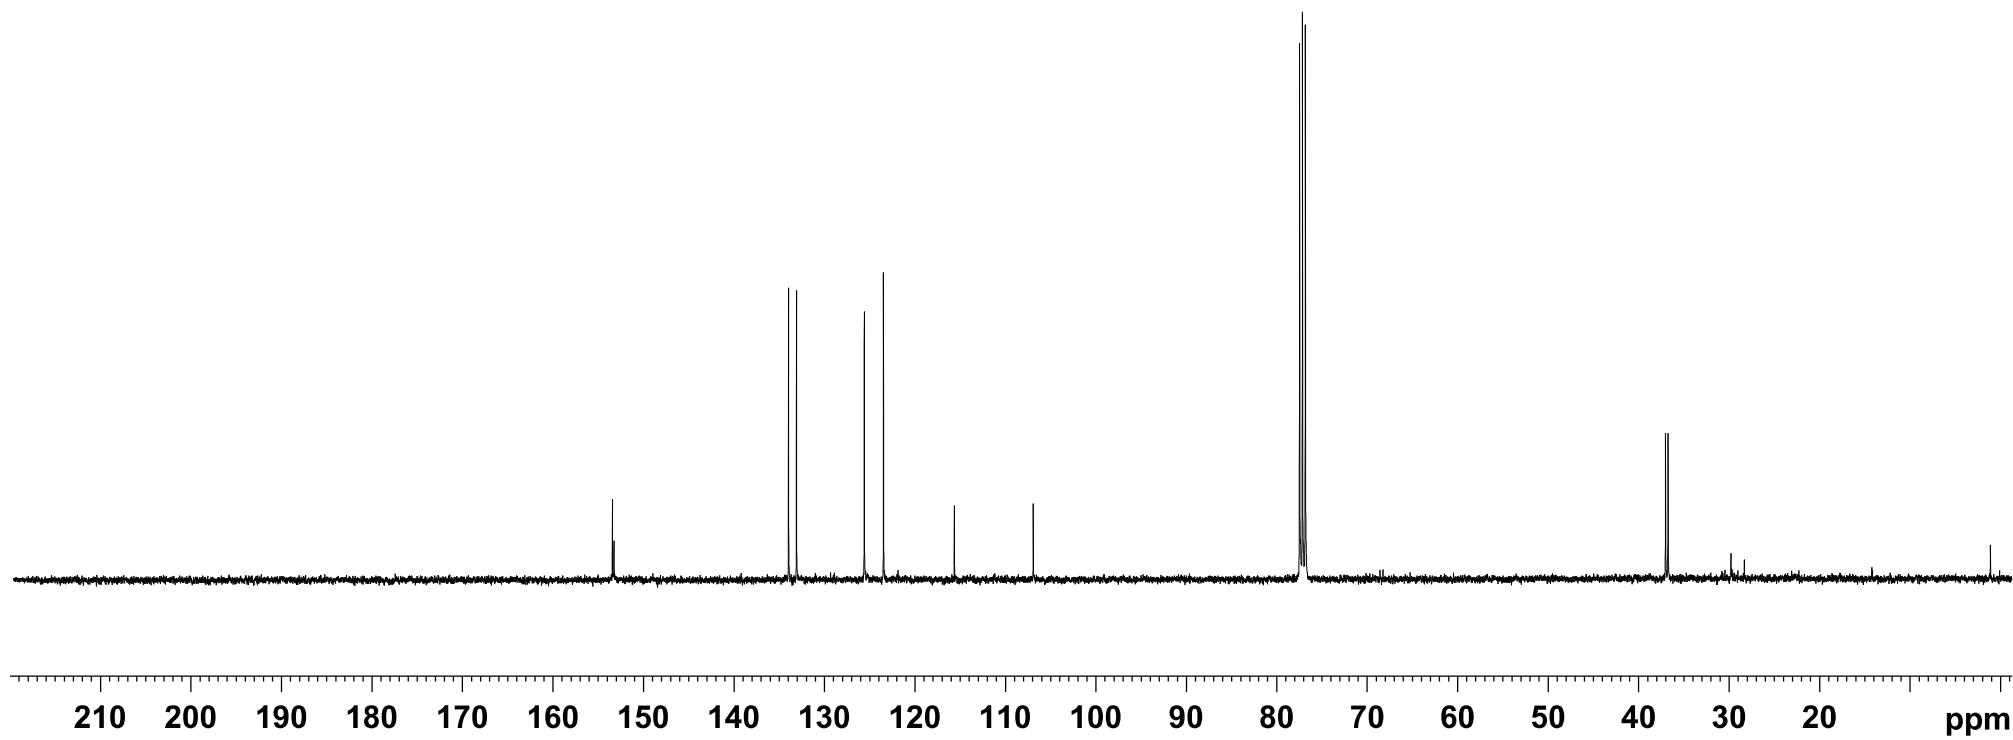

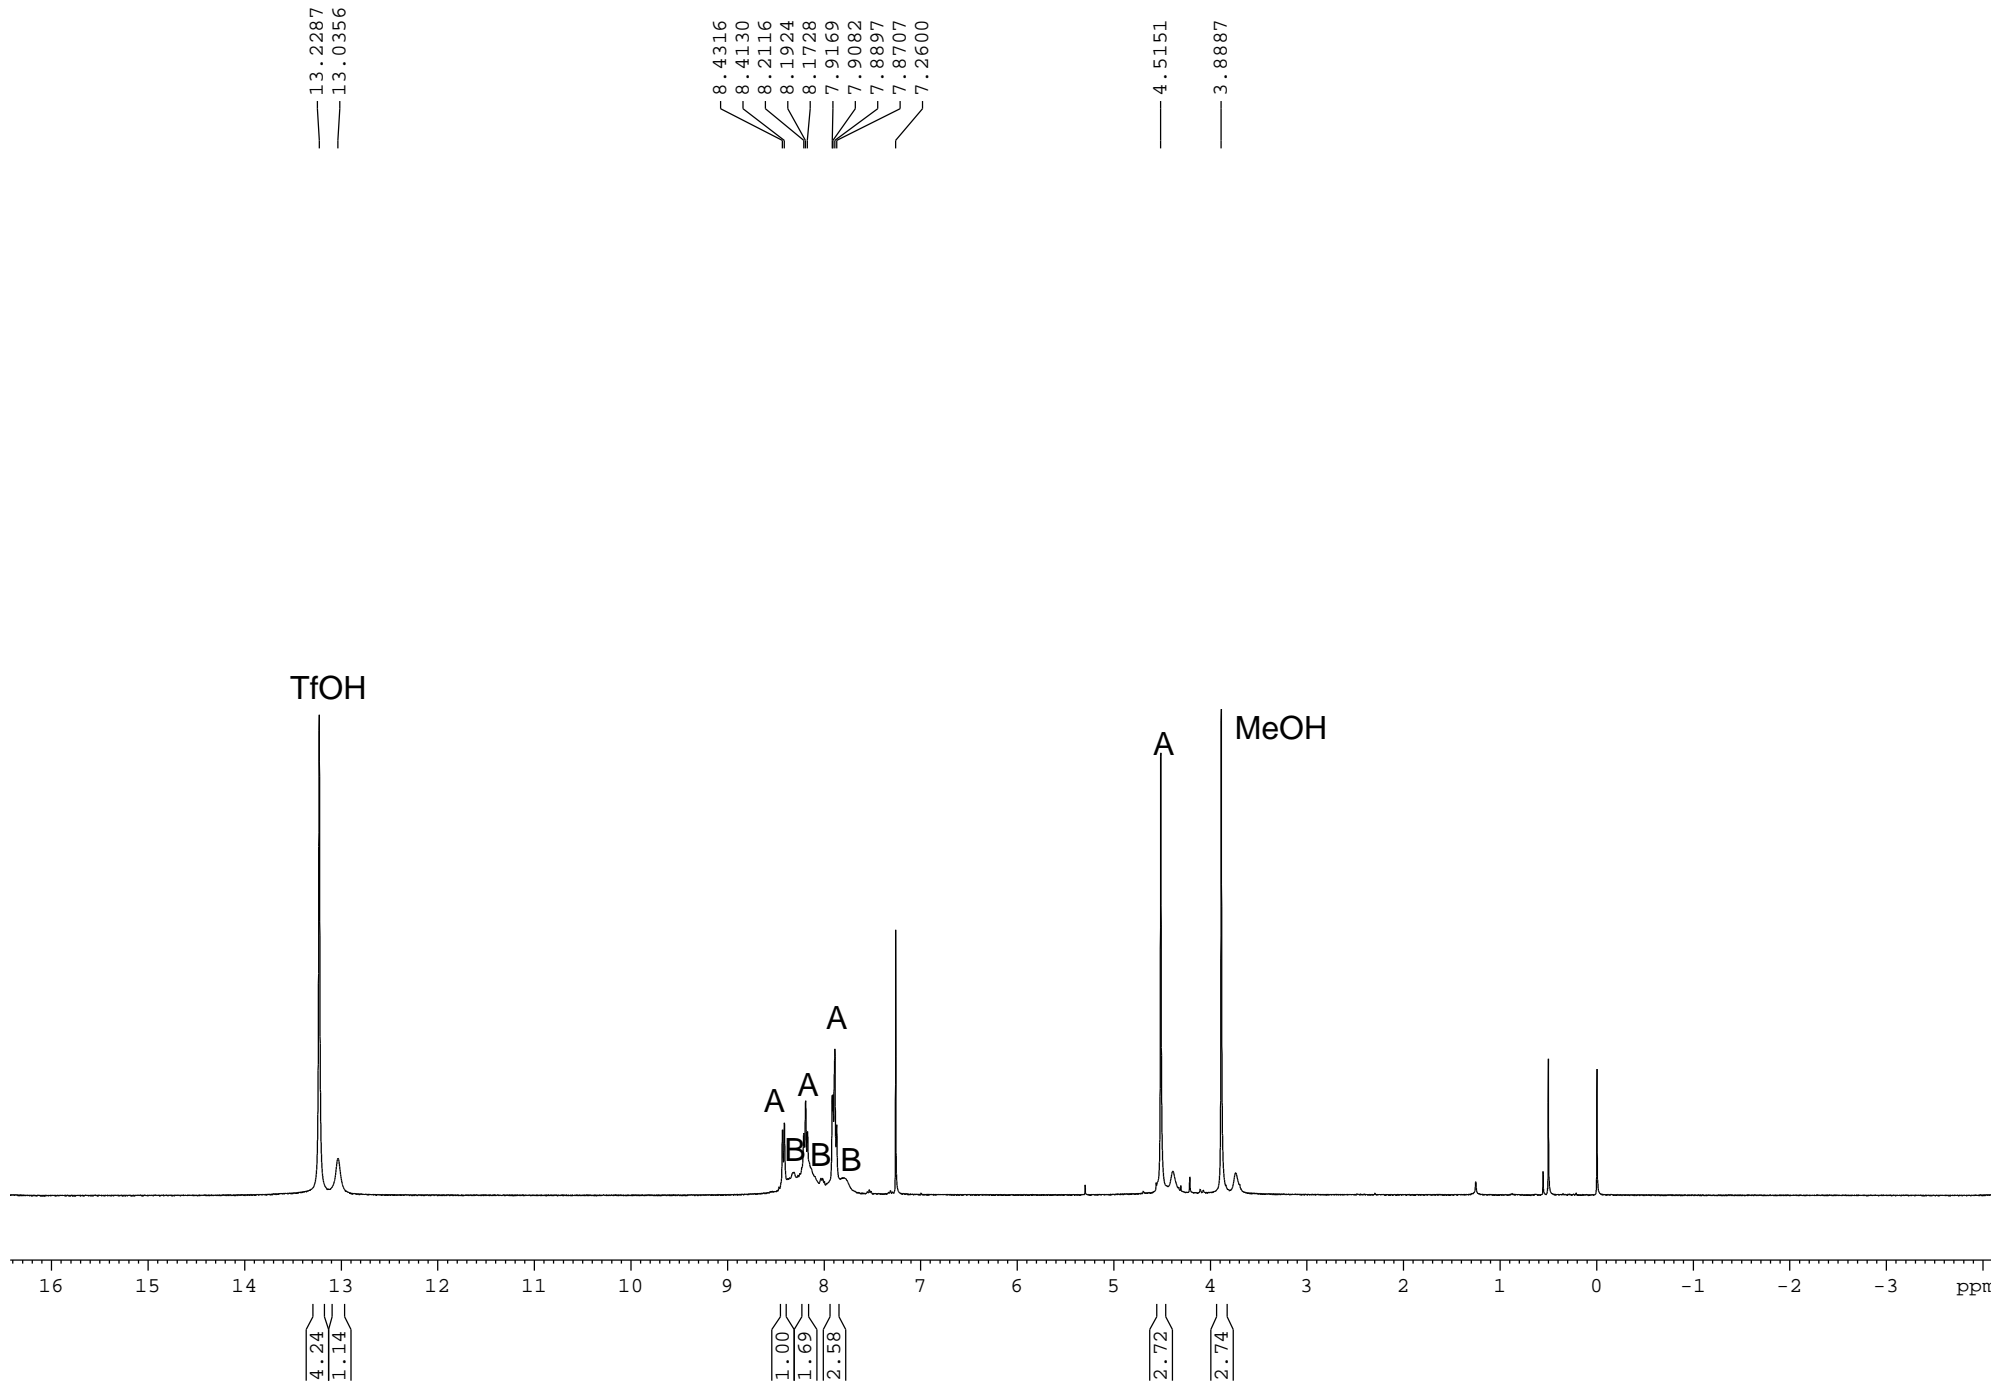

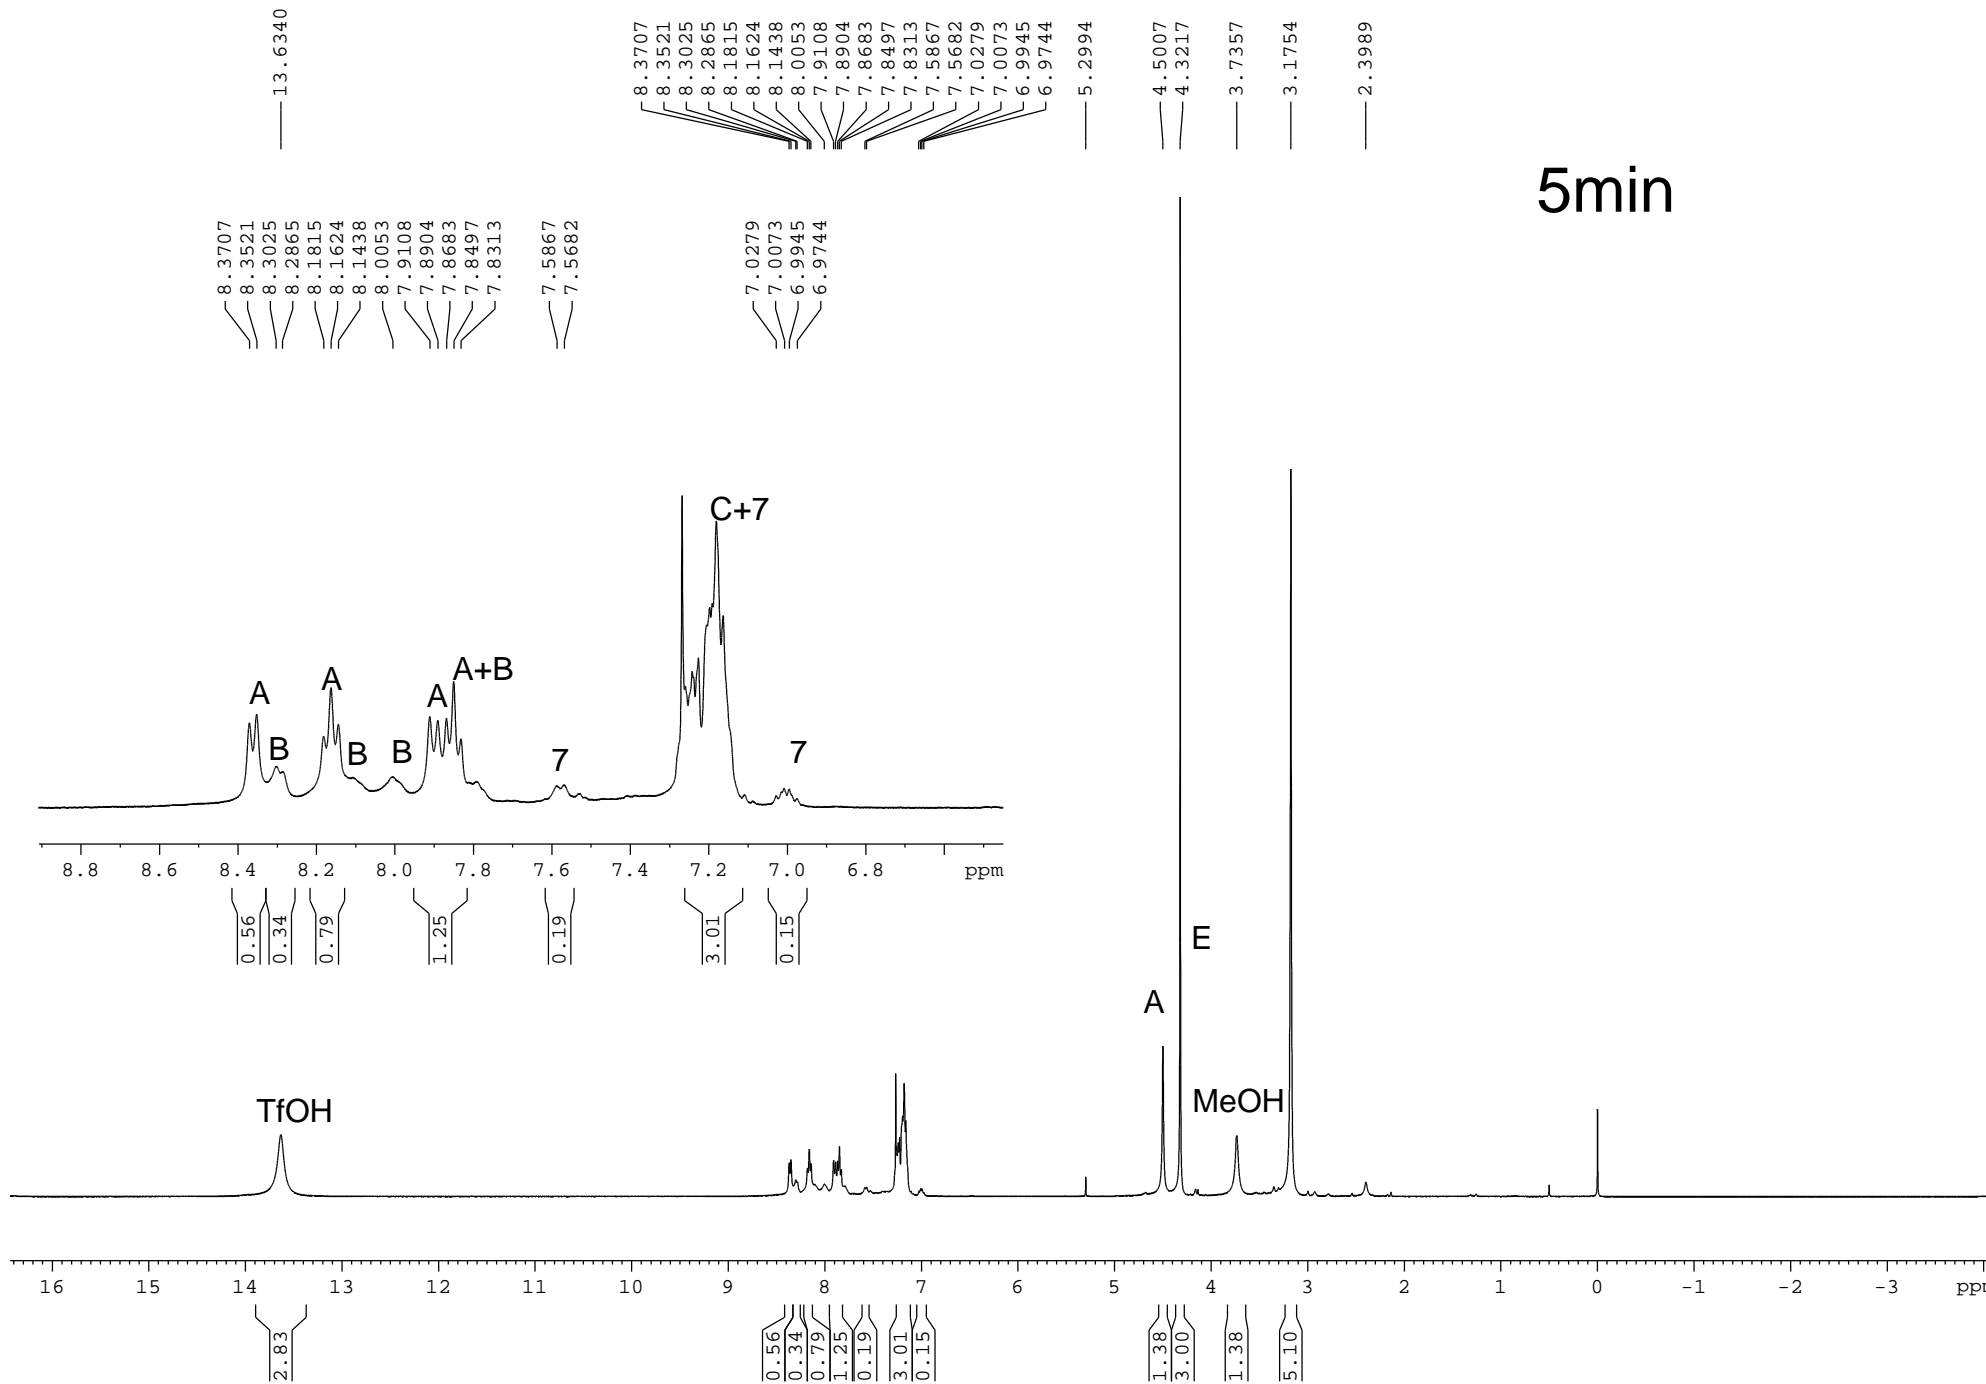

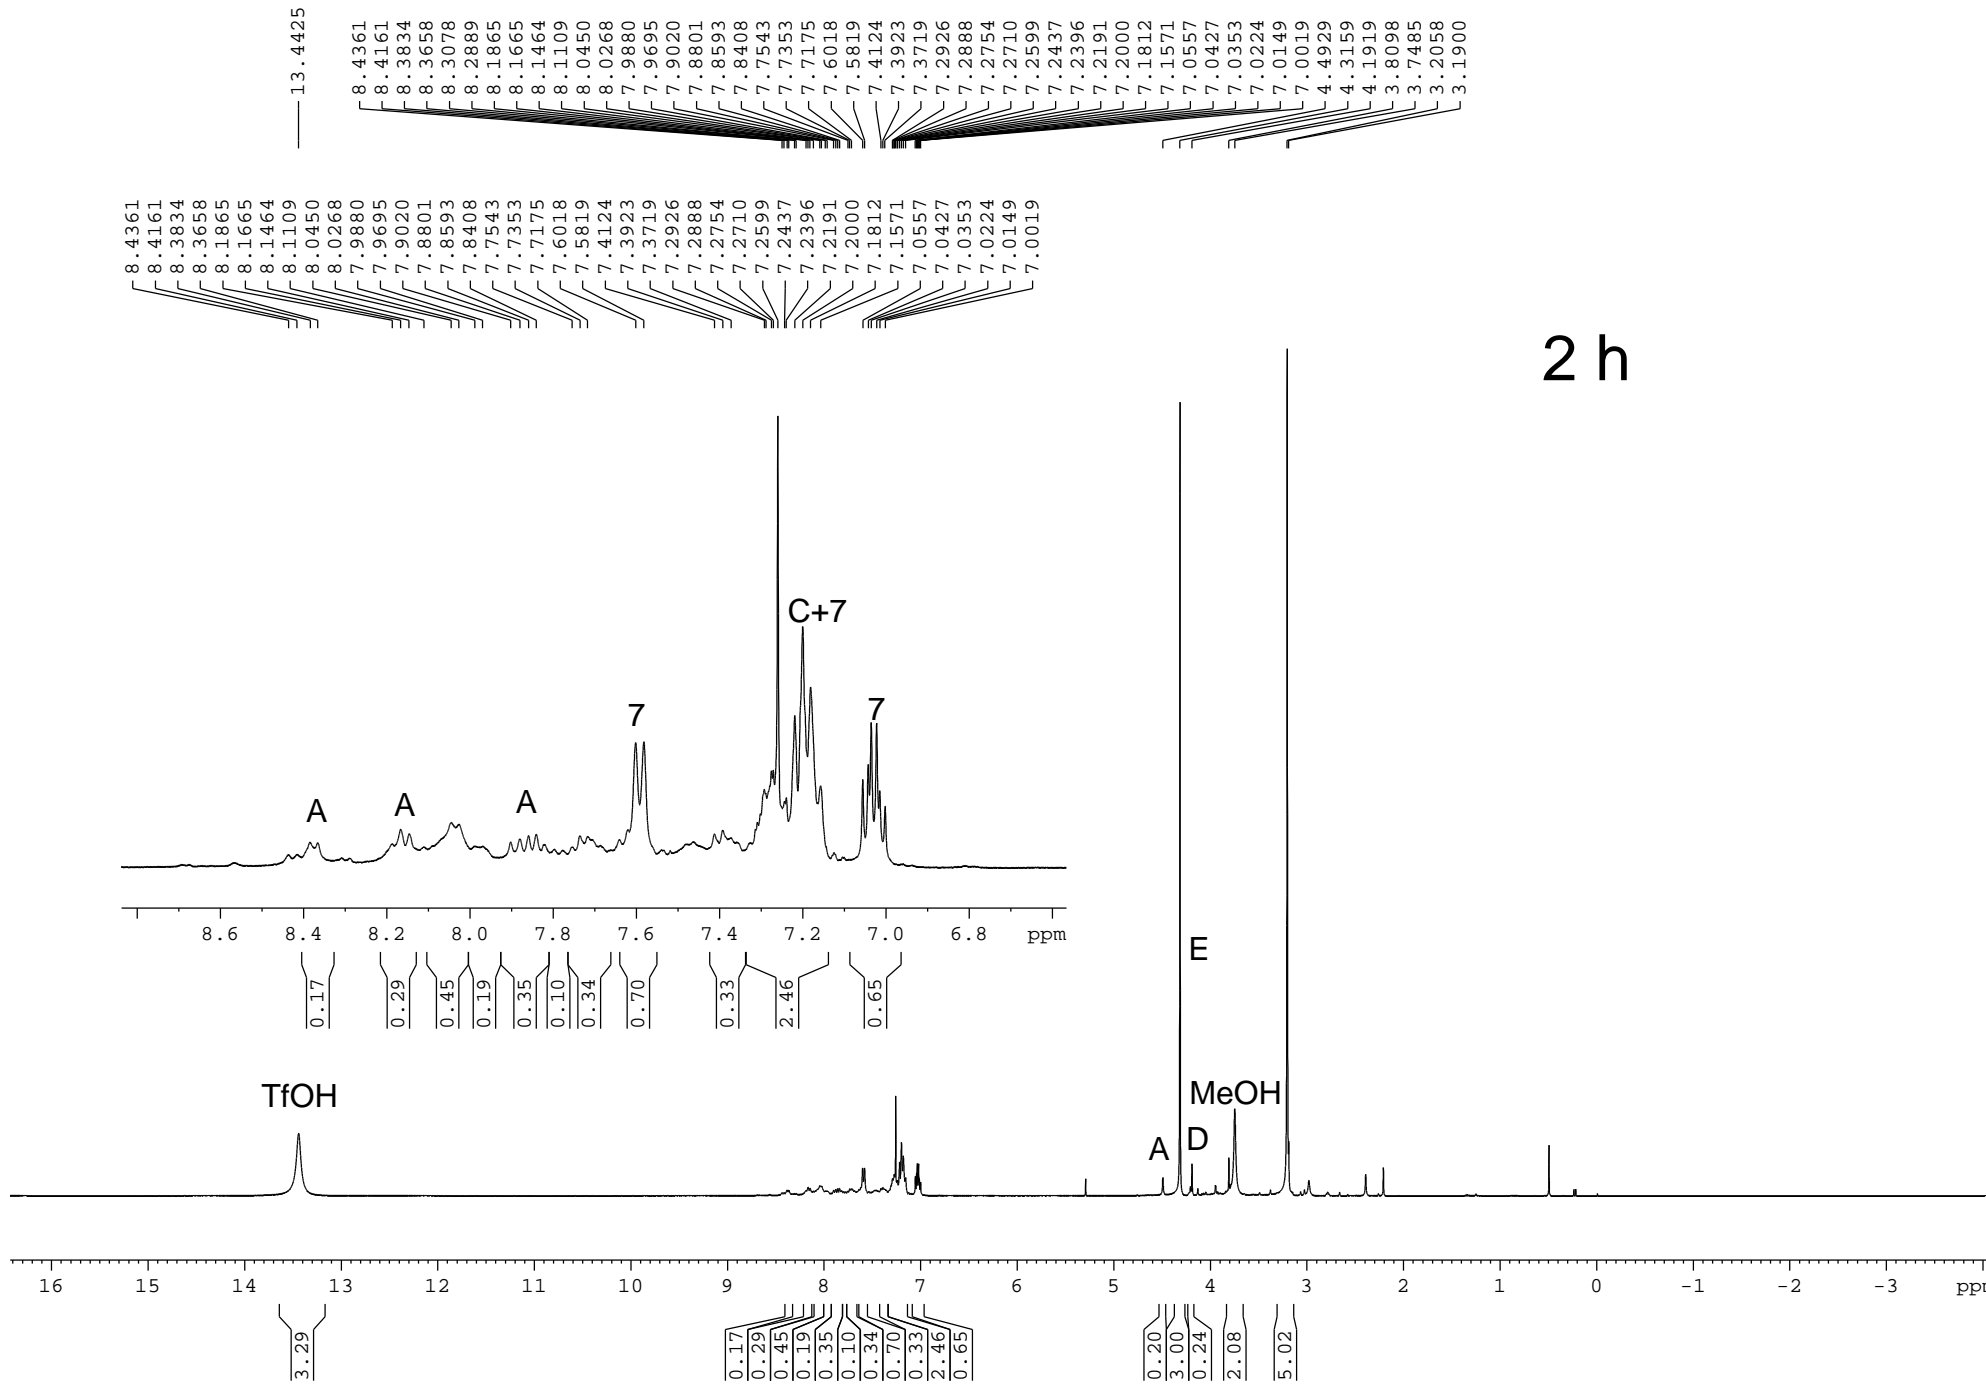

4 h

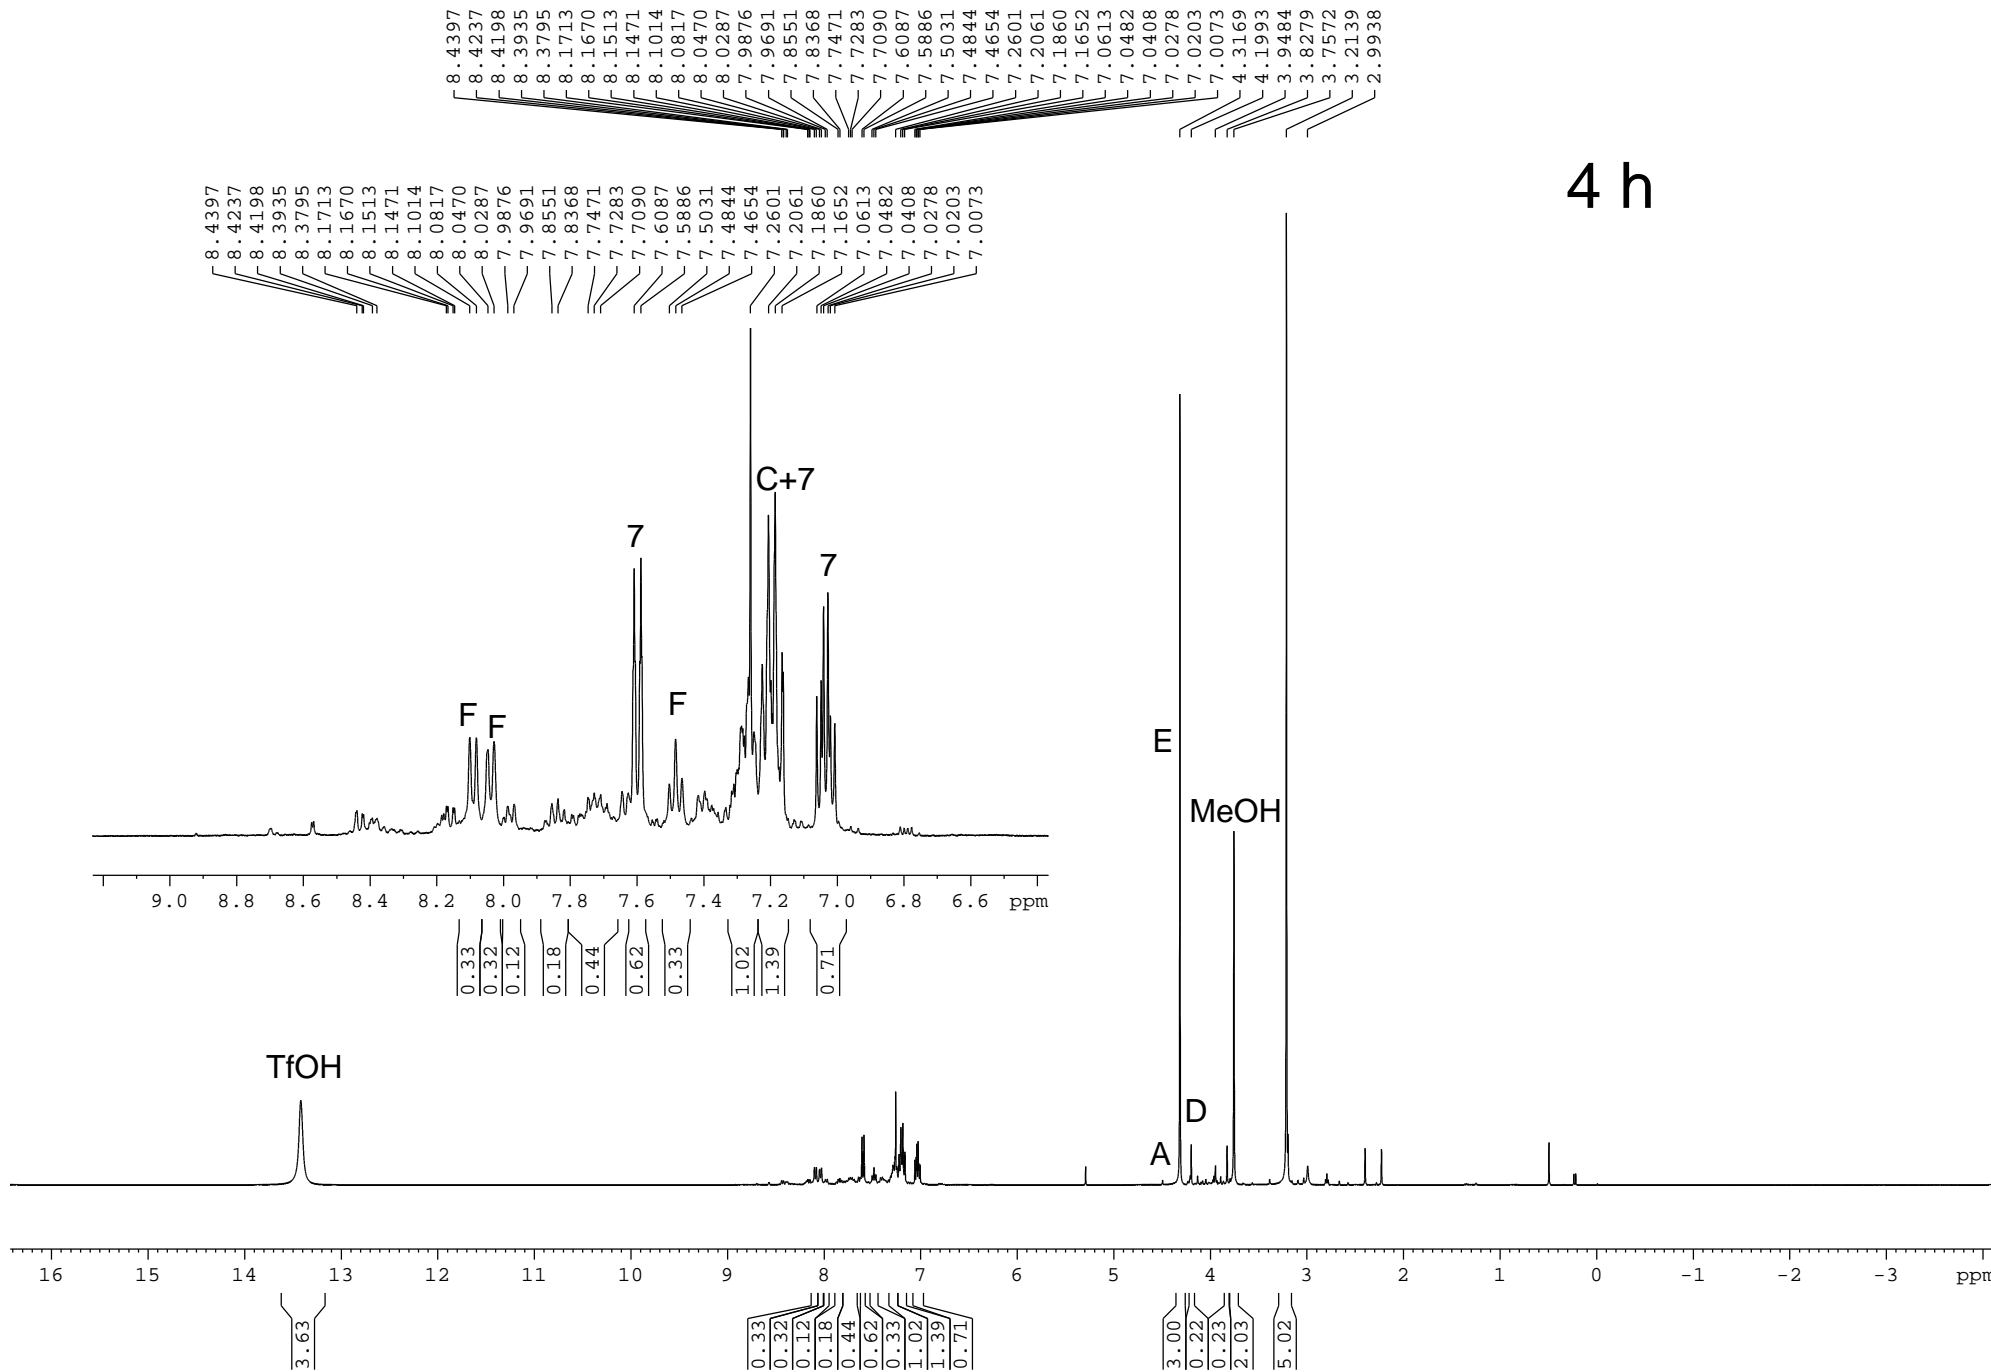

Supplement: c5cc02533h1.pdf [file c5cc02533h1.pdf]
